# Supplementary material
Source: publisher figshare collection journal article supplement (https://acs.figshare.com/ndownloader/files/14400632)

## Trifluoromethylation of Unactivated Alkenes with Me<sub>3</sub>SiCF<sub>3</sub> and *N*-Iodosuccinimide

Xinkan Yang and Gavin Chit Tsui\*

### Table of Contents

|                              |     |
|------------------------------|-----|
| General Experimental .....   | S1  |
| Materials.....               | S1  |
| Instrumentation.....         | S1  |
| Experimental Procedures..... | S2  |
| Mechanistic Studies.....     | S8  |
| Optimization Studies.....    | S13 |
| Characterization Data .....  | S16 |
| Spectra.....                 | S28 |

**General Experimental.** Unless otherwise noted, reactions were carried out under argon in a 25mL round-bottom flask with magnetic stirring. Analytical thin layer chromatography (TLC) was performed with EM Science silica gel 60 F254 aluminum plates. Visualization was done under a UV lamp (254 nm) and by immersion in ethanolic phosphomolybdic acid (PMA) or potassium permanganate (KMnO<sub>4</sub>), followed by heating using a heat gun. Organic solutions were concentrated by rotary evaporation at 23–35 °C. Purification of reaction products were generally done by flash column chromatography with Grace Materials Technologies 230–400 mesh silica gel.

**Materials.** Anhydrous DMSO was purchased from J&K Scientific. NIS was purchased from Dieckmann then recrystallized from hexane : dioxane (2 : 1), then filtration and dried under reduced pressure for overnight.. AgOAc was purchased from Acros. DMF was dried over Solvent Purification System then bubbled with argon for 24 h. Other chemicals for substrates preparation were purchased from Acros, J&K Scientific, Aldrich and Dikemann.

**Instrumentation.** Proton nuclear magnetic resonance spectra (<sup>1</sup>H NMR) spectra, carbon nuclear magnetic resonance spectra (<sup>13</sup>C NMR) and fluorine nuclear magnetic resonance spectra (<sup>19</sup>F NMR) were recorded at 23 °C on a Bruker 400 spectrometer in CDCl<sub>3</sub> (400 MHz for <sup>1</sup>H, 101 MHz for <sup>13</sup>C and 376 MHz for <sup>19</sup>F) and Bruker 500 spectrometer in CDCl<sub>3</sub> (500 MHz for <sup>1</sup>H, 126 MHz for <sup>13</sup>C and 470 MHz for <sup>19</sup>F). Chemical shifts for protons were reported as parts per million in δ scale using solvent residual peak (CHCl<sub>3</sub>: 7.26 ppm) or tetramethylsilane (0.00 ppm) as internal standards. Chemical shifts of <sup>13</sup>C NMR spectra were reported in ppm from the central peak of CDCl<sub>3</sub> (77.16 ppm) on the δ scale. Chemical shifts of <sup>19</sup>F NMR are reported as parts per million in δ scale using benzotrifluoride (-63.72 ppm) as internal standards. Data are represented as follows: chemical shift, integration, multiplicity (s = singlet, d = doublet, t = triplet, q = quartet, qn = quintuplet, sx = sextet, sp = septuplet, m = multiplet, br = broad), and coupling constant (*J*, Hz). High resolution mass spectra (HRMS) were obtained on a Finnigan MAT 95XL GC Mass Spectrometer or a Thermo Scientific Q Exactive Focus Mass Spectrometer or Bruker 9.4T FTICR Mass Spectrometer. The control experiment results were obtained on a Shimadzu GCMS-QP2010 SE GC MS Spectrometer.

## Experimental Procedures:

### General procedure (*cf.* Scheme 2):

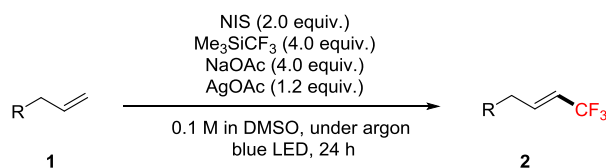

To a glass tube equipped with a magnetic stir bar were added alkene **1** (0.3 mmol), NIS (0.6 mmol), NaOAc (1.2 mmol) and AgOAc (0.36 mmol). The tube was then sealed with a septum, evacuated and refilled with argon for three times. Anhydrous DMSO (3.0 mL) was added via a syringe and the solution was further evacuated and refilled with argon for three times. Finally, Me<sub>3</sub>SiCF<sub>3</sub> (180 μL, 0.4 mmol) was added dropwise to the solution. The tube was sealed and placed under a 16 W blue LED light trip at room temperature and stirred for 24 h (see picture below). The *E/Z* ratio was determined by <sup>19</sup>F NMR of the crude mixture. The reaction was quenched with H<sub>2</sub>O, extracted with diethyl ether for three times. The organic layers were combined, washed with brine, dried over anhydrous Na<sub>2</sub>SO<sub>4</sub>, filtered and concentrated by rotary evaporator. The crude product was purified by flash column chromatography on silica gel to afford the desired product.

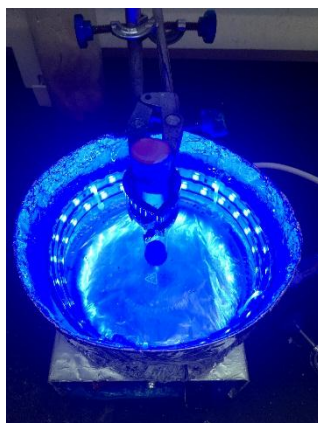

## Substrates:

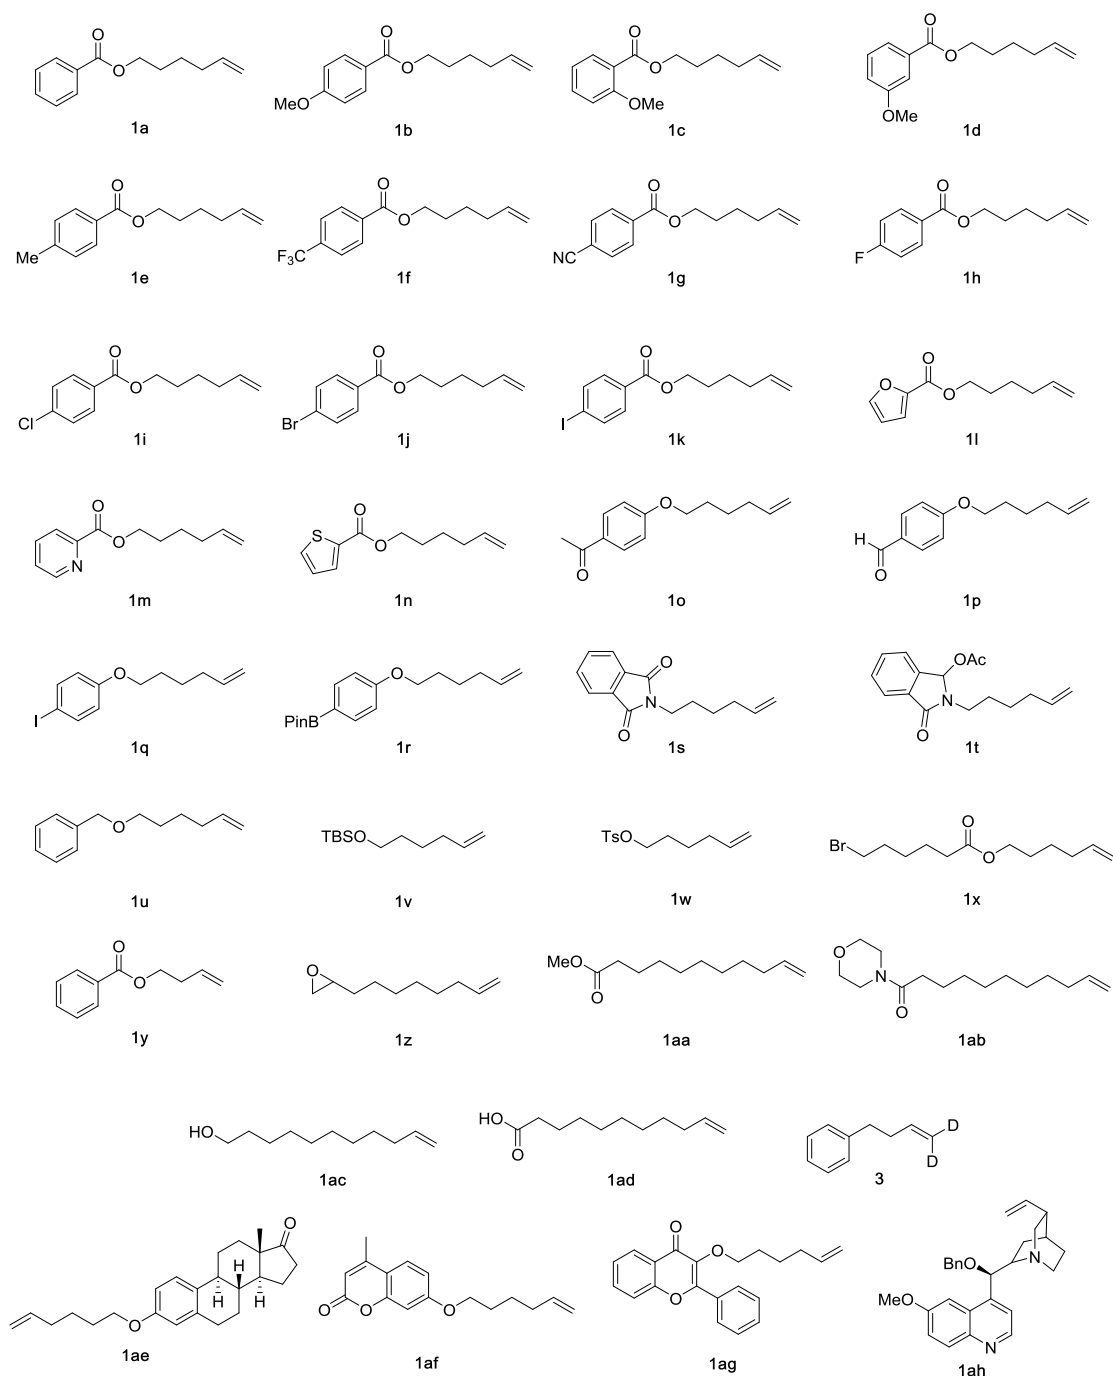

Alkenes **1a-1c**, **1e**, **1g-1s**, **1u-1y**, **1ab**, **1ae-1ah** were synthesized according to the literature procedures.<sup>1</sup> **1z**, **1aa**, **1ac**, **1ad** were commercially available. **1t** was synthesized from **1s**, **1d** and **1f** were synthesized by esterification from corresponding benzoyl chloride and 5-hexene-1-ol. **3** was synthesized according to the literature reported procedure.<sup>2</sup>

1 (a) Zhu, L.; Wang, L. S.; Li, B.; Fu, B.; Zhang, C. P.; Li, W. *Chem. Commun.* **2016**, 52, 6371. (b) Lin, Q.-Y.; Xu, X.-H.; Zhang, K.; Qing, F.-L. *Angew. Chem., Int. Ed.* **2016**, 55, 1479. (c) Liu, Z.-Q.; Liu, D. *J. Org. Chem.* **2017**, 82, 1649. (d) Braun, M.-G.; Doyle, A. G. *J. Am. Chem. Soc.* **2013**, 135, 12990. (e) Wu, X.; Chu, L.; Qing, F.-L. *Angew. Chem., Int. Ed.* **2013**, 52, 2198. (f) Ren, Y.; Zheng, X.; Zhang, X. *Synlett* **2018**, 29, 1028. (g) Ma, G.; Wan, W.; Hu, Q.; Jiang, H.; Wang, J.; Zhu, S.; Hao, J. *Chem. Commun.* **2014**, 50, 7527.

2 Shaw, M. H.; Croft, R. A.; Whittingham, W. G.; Bower, J. F. *J. Am. Chem. Soc.* **2015**, 137, 8054.

#### Preparation of hex-5-en-1-yl 3-methoxybenzoate (1d):

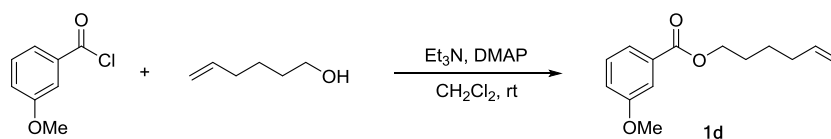

To a solution of 5-hexene-1-ol (0.48 mL, 4.0 mmol), Et<sub>3</sub>N (1.11 mL, 8.0 mmol), DMAP (49.0 mg, 0.4 mmol) in CH<sub>2</sub>Cl<sub>2</sub> (10 mL) was added dropwise with a solution of 3-Methoxybenzoyl chloride (0.89 mL, 6.0 mmol) in CH<sub>2</sub>Cl<sub>2</sub> (4.0 mL) at 0 °C, the resulting mixture was vigorously stirred at room temperature and monitored the reaction by TLC. After completion, treated with sat. NaHCO<sub>3</sub> aq. then stirred at room temperature for another 20 mins. Et<sub>2</sub>O was added, the organic layer was separated, washed with water, the combined extracts were washed with brine, dried over anhydrous Na<sub>2</sub>SO<sub>4</sub>, Filtered and evaporated the solvent, the residue was directly purified by flash chromatography to deliver the desired product **1d** as a colorless oil (930 mg, 4.0 mmol, 100% yield), R<sub>f</sub> = 0.60 (hexane : EtOAc = 5 : 1). **<sup>1</sup>H NMR** (400 MHz, CDCl<sub>3</sub>): δ 7.63 (d, *J* = 7.6 Hz, 1H), 7.56 (s, 1H), 7.34 (t, *J* = 7.8 Hz, 1H), 7.09 (dd, *J* = 8.4 Hz, *J* = 2.8 Hz, 1H), 5.87-5.77 (m, 1H), 5.06-4.96 (m, 2H), 4.32 (t, *J* = 6.6 Hz, 2H), 3.85 (s, 3H), 2.16-2.10 (m, 2H), 1.82-1.75 (m, 2H), 1.59-1.51 (m, 2H) ppm. **<sup>13</sup>C NMR** (101 MHz, CDCl<sub>3</sub>): δ 166.6, 159.6, 138.4, 131.9, 129.5, 122.0, 119.4, 115.0, 114.2, 65.1, 55.5, 33.4, 28.3, 25.4 ppm. **HRMS** m/z (APCI): calcd. for C<sub>14</sub>H<sub>19</sub>O<sub>3</sub> [M+H]<sup>+</sup> : 235.1329; found: 235.1324.

#### Preparation of hex-5-en-1-yl 4-(trifluoromethyl)benzoate (1f):

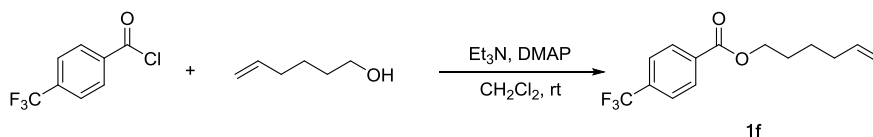

To a solution of 5-hexene-1-ol (0.24 mL, 2.0 mmol), Et<sub>3</sub>N (0.56 mL, 4.0 mmol), DMAP (24.4 mg, 0.2 mmol) in CH<sub>2</sub>Cl<sub>2</sub> (5.0 mL) was added dropwise with a solution of 4-trifluoromethylbenzoyl chloride (626 mg, 3.0 mmol) in CH<sub>2</sub>Cl<sub>2</sub> (2.0 mL) at 0 °C, the resulting mixture was vigorously stirred at room temperature and monitored the reaction by TLC. After completion, treated with sat. NaHCO<sub>3</sub> aq. then stirred at room temperature for another 20 mins. Et<sub>2</sub>O was added, the organic layer was separated, washed with water, the combined extracts were washed with brine, dried over anhydrous Na<sub>2</sub>SO<sub>4</sub>. Filtered and evaporated the solvent, the residue was directly purified by flash chromatography to deliver the desired product **1f** as a colorless oil (510 mg, 1.88 mmol, 94% yield), R<sub>f</sub> = 0.70 (hexane : EtOAc = 5 : 1). **<sup>1</sup>H NMR** (400 MHz, CDCl<sub>3</sub>): δ 8.15 (d, *J* = 8.0 Hz, 2H), 7.70 (d, *J* = 8.0 Hz, 2H), 5.87-5.77 (m, 1H), 5.06-4.97 (m, 2H), 4.36 (t, *J* = 6.6 Hz, 2H), 2.16-2.11 (m, 2H), 1.84-1.77 (m, 2H), 1.59-1.52 (m, 2H) ppm. **<sup>13</sup>C NMR** (101 MHz, CDCl<sub>3</sub>): δ 165.6, 138.3, 134.5 (q, *J*<sub>C-F</sub> = 32.6 Hz), 133.8, 130.1, 125.5 (q, *J*<sub>C-F</sub> = 3.7 Hz), 123.8 (q, *J*<sub>C-F</sub> = 273.6 Hz), 115.1, 65.6, 33.4, 28.2, 25.4 ppm. **<sup>19</sup>F NMR** (376 MHz, CDCl<sub>3</sub>): δ: -64.11 (s, 3F). **HRMS** m/z (APCI): calcd. for C<sub>14</sub>H<sub>16</sub>F<sub>3</sub>O<sub>2</sub> [M+H]<sup>+</sup> : 273.1097; found: 273.1098.

### Preparation of 2-(hex-5-en-1-yl)-3-oxoisindolin-1-yl acetate (**1t**):

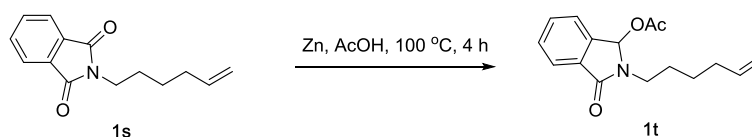

A solution of **1s** (190 mg, 0.83 mmol), Zn (124 mg, 1.91 mmol) dust in acetic acid (4.2 mL) was heated to reflux for 4 hours, then cool down to room temperature. Most of acetic acid was removed under reduced pressure, then the residue was directly purified by column chromatography to afford the product **1t** (153 mg, 0.56 mmol, 68% yield) as a yellow oil.  $R_f = 0.20$  (hexane : EtOAc = 5 : 1). **<sup>1</sup>H NMR** (400 MHz, CDCl<sub>3</sub>):  $\delta$  7.78-7.76 (m, 1H), 7.55-7.47 (m, 3H), 6.98 (s, 1H), 5.80-5.69 (m, 1H), 5.00-4.90 (m, 2H), 3.76-3.69 (m, 1H), 3.28-3.21 (m, 1H), 2.14 (s, 3H), 2.09-2.03 (m, 2H), 1.70-1.54 (m, 2H), 1.45-1.37 (m, 2H) ppm. **<sup>13</sup>C NMR** (101 MHz, CDCl<sub>3</sub>):  $\delta$  171.2, 167.8, 140.9, 138.4, 132.3, 132.1, 130.3, 123.8, 123.5, 114.9, 81.2, 40.2, 33.3, 27.7, 26.1, 21.1 ppm. **HRMS**  $m/z$  (APCI): calcd. for C<sub>16</sub>H<sub>20</sub>NO<sub>3</sub> [M+H]<sup>+</sup>: 274.1438; found: 274.1437.

### Preparation of (2-(2-vinylcyclopropyl)ethyl)benzene (**9**):

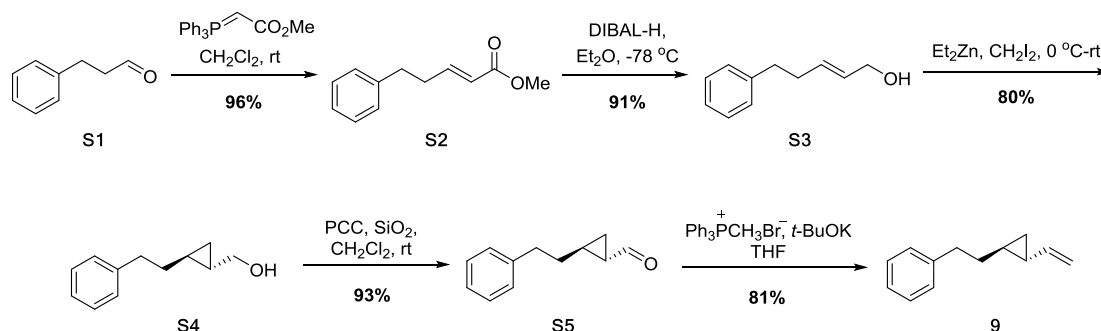

To a stirred solution of **S1** (670 mg, 5.0 mmol) in CH<sub>2</sub>Cl<sub>2</sub> (20.0 mL), Wittig ylide (2.0 g, 6.0 mmol) was added at room temperature under argon atmosphere, then stirred at room temperature for 24 h. the solvent was evaporated and the residue was directly purified by column chromatography to afford **S2** as a colorless oil (840 mg, 4.8 mmol, 96% yield, E / Z = 91 : 9).  $R_f = 0.60$  (hexane : EtOAc = 8 : 1). The spectral data are in full accordance with the literature report.<sup>3</sup>

To a stirred solution of **S2** (840 mg, 4.78 mmol) in Et<sub>2</sub>O (48.0 mL), DIBAL-H (1.0 M in hexane, 9.6 mL, 9.6 mmol) was added at -78 °C under argon atmosphere, then stirred at -78 °C for 2 h. Carefully quenched with saturated aqueous solution of sodium/potassium tartrate, then stirred for extra 1 h at room temperature. Extracted with Et<sub>2</sub>O for three times, then the organic layers were combined and washed with brine, dried over anhydrous Na<sub>2</sub>SO<sub>4</sub>. Filtered and evaporated the solvent, the residue was directly purified by flash chromatography to deliver the desired product **S3** as a light yellow oil (435 mg, 4.4 mmol, 91% yield, E / Z = 91 : 9).  $R_f = 0.20$  (hexane : EtOAc = 5 : 1). The spectral data are in full accordance with the literature report.<sup>3</sup>

Under argon, **S3** (405 mg, 2.5 mmol) in dry CH<sub>2</sub>Cl<sub>2</sub> (7.5 mL) was treated with Et<sub>2</sub>Zn (1.0 M in hexane, 3.1 mmol, 3.1 mmol) at 0 °C, the suspension was stirred at 0 °C for 30 mins. In a second flask, Et<sub>2</sub>Zn (1.0 M in hexane, 3.1 mmol, 3.1 mmol) was added to CH<sub>2</sub>I<sub>2</sub> (0.4 mL, 5.0 mmol) in dry CH<sub>2</sub>Cl<sub>2</sub>

(15.0 mL) and stirred for 30 min at 0 °C. The contents of the first flask were transferred into the second flask at 0 °C and the mixture was stirred at room temperature until the substrate was completely consumed. Slowly quenched with sat. NH<sub>4</sub>Cl aq., when an emulsion formed, 2 M HCl aq. was added slowly until the solution became clear. Extracted with CH<sub>2</sub>Cl<sub>2</sub> for three times, then the organic layers were combined and washed with brine, dried over anhydrous Na<sub>2</sub>SO<sub>4</sub>. Filtered and evaporated the solvent, the residue was directly purified by flash chromatography to deliver the desired product **S4** as a light yellow oil. (350 mg, 2.0 mmol, 80% yield, dr (anti : syn) = 95 : 5). R<sub>f</sub> = 0.22 (hexane : EtOAc = 5 : 1). **<sup>1</sup>H NMR** (400 MHz, CDCl<sub>3</sub>): δ 7.32-7.28 (m, 2H), 7.21-7.18 (m, 3H), 3.44-3.36 (m, 2H), 2.79-5.67 (m, 2H), 1.66 (s, 1H), 1.69-1.51 (m, 2H), 0.88-0.80 (m, 1H), 0.67-0.59 (m, 1H), 0.42-0.32 (m, 2H) ppm. **<sup>13</sup>C NMR** (101 MHz, CDCl<sub>3</sub>): δ 142.3, 128.5, 128.4, 125.8, 67.0, 35.9, 35.4, 21.4, 16.9, 9.0 ppm.

To a stirred solution of **S4** (350 mg, 2.0 mmol) in CH<sub>2</sub>Cl<sub>2</sub> (10.0 mL) was added PCC (650 mg, 3.0 mmol) and silica gel (1.0 g) at room temperature under argon atmosphere, then stirred at room temperature and monitored by TLC. After completion, the solvent was evaporated and the residue was directly purified by column chromatography to afford the desired product **S5** as a colorless oil: (334 mg, 1.9 mmol, 93% yield, dr (anti : syn) = 95 : 5). R<sub>f</sub> = 0.4 (hexane : EtOAc = 2 : 1). **<sup>1</sup>H NMR** (400 MHz, CDCl<sub>3</sub>): δ 8.97 (d, *J* = 5.6 Hz, 1H), 7.31-7.28 (m, 2H), 7.22-7.16 (m, 3H), 2.73 (d, *J* = 7.4 Hz, 2H), 1.76-1.59 (m, 3H), 1.51-1.46 (m, 1H), 1.31-1.27 (m, 1H), 0.95-0.90 (m, 1H) ppm. **<sup>13</sup>C NMR** (101 MHz, CDCl<sub>3</sub>): δ 201.0, 141.4, 128.5, 128.5, 126.1, 35.4, 34.5, 30.5, 22.3, 14.8 ppm.

Under argon, to a suspension of Wittig ylide (1.37 g, 3.84 mmol) in THF (2.0 mL) was quickly added *t*-BuOK (430 mg, 3.84 mmol), then stirred at room temperature for 30 mins, after that, the reaction system was cooled to 0 °C, a THF (2.0 mL) solution of **S5** (334 mg, 1.92 mmol) was added dropwise, then warmed to room temperature and stirred for overnight. Quenched with water, extracted with Et<sub>2</sub>O for three times, then the organic layers were combined and washed with brine, dried over anhydrous Na<sub>2</sub>SO<sub>4</sub>. Filtered and evaporated the solvent, the residue was directly purified by flash chromatography to deliver the desired product **9** as a colorless oil. (270 mg, 1.55 mmol, 81% yield, dr (anti : syn) = 95 : 5). R<sub>f</sub> = 0.90 (hexane : EtOAc = 5 : 1). **<sup>1</sup>H NMR** (400 MHz, CDCl<sub>3</sub>): δ 7.34-7.32 (m, 2H), 7.26-7.24 (m, 3H), 5.48-5.39 (m, 1H), 5.08 (d, *J* = 16.8 Hz, 1H), 4.90 (d, *J* = 10.0 Hz, 1H), 2.79-2.76 (m, 2H), 1.69-1.63 (m, 2H), 1.26-1.21 (m, 1H), 0.88-0.85 (m, 1H), 0.67-0.57 (m, 2H) ppm. **<sup>13</sup>C NMR** (101 MHz, CDCl<sub>3</sub>): δ 142.4, 142.1, 128.6, 128.4, 125.8, 111.3, 35.9, 35.8, 22.7, 20.8, 14.0 ppm. **HRMS** *m/z* (APCI): calcd. for C<sub>13</sub>H<sub>17</sub> [M+H]<sup>+</sup> : 173.1325; found: 173.1324.

### Gram scale synthesis:

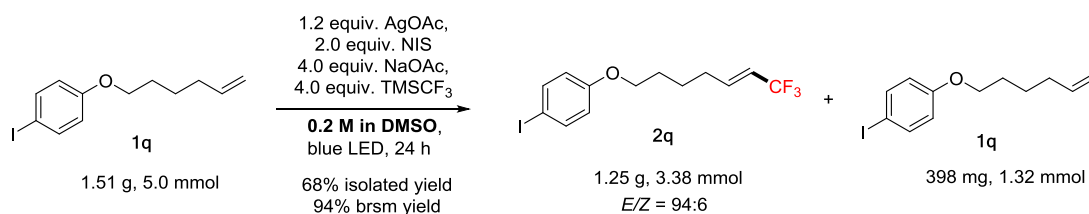

Under argon, to a 50 mL round bottom flask equipped with a magnetic stir bar was added alkene **1q** (1.51 g, 5.0 mmol), NIS (2.25 g, 10.0 mmol), NaOAc (1.64 g, 20.0 mmol) and AgOAc (1.0 g, 6.0 mmol). Then the tube was sealed with a septum, evacuated and refilled with argon for three times. Dry DMSO (25 mL) was added via syringe and the solution was again evacuated and refilled with argon for three times. Then Me<sub>3</sub>SiCF<sub>3</sub> (3.0 mL, 20.0 mmol) was added dropwise to the above solution. The flask was sealed and placed under a 16 W blue LED light trip at room temperature and stirred for 24 h. The *E/Z* ratio (94:6) was determined by <sup>19</sup>F NMR of the crude mixture. Then quenched with H<sub>2</sub>O, extracted with diethyl ether for three times. The organic layers were combined, washed with brine, dried over anhydrous Na<sub>2</sub>SO<sub>4</sub>, filtered and concentrated by rotary evaporator. The crude product was purified by flash column chromatography on silica gel to afford the desired product **2q** as a colorless oil (1.25 g, 3.38 mmol, 68%, *E/Z* = 93:7, 398 mg **1q** was recovered, 94% brsm yield). R<sub>f</sub> = 0.40 (hexane).

## Mechanistic Studies:

### NMR experiments:

Under argon, to an NMR tube charged with AgOAc (10.0 mg, 0.06 mmol), NIS (22.5 mg, 0.1 mmol), DMSO- $d_6$  (0.5 mL) was added, then sealed with a septum. The mixture was evacuated and refilled with argon for three times, sealed and sonicated for 5 mins, then directly run the  $^1\text{H}$  NMR and  $^{13}\text{C}$  NMR experiments on the set time.

#### $^1\text{H}$ NMR experiment

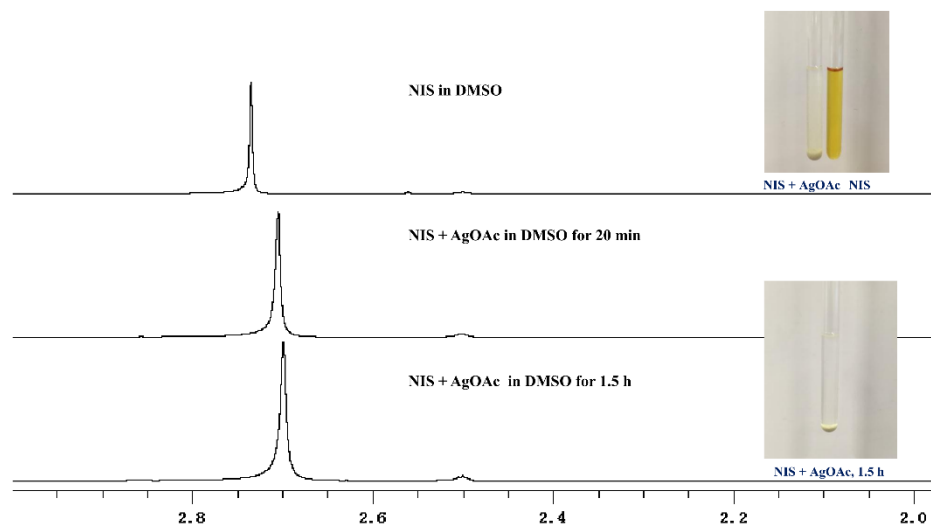

#### $^{13}\text{C}$ NMR experiment

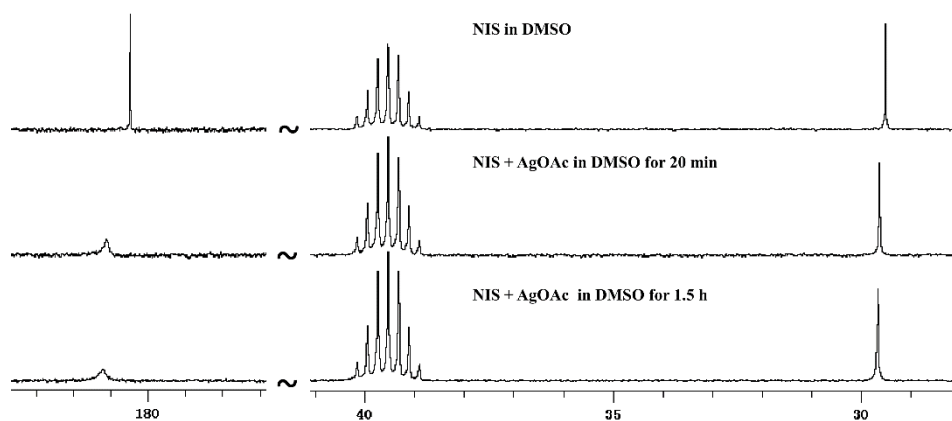



**UV-Vis absorption spectra (recorded on a Varian CARY 1E UV-vis spectrophotometer):**

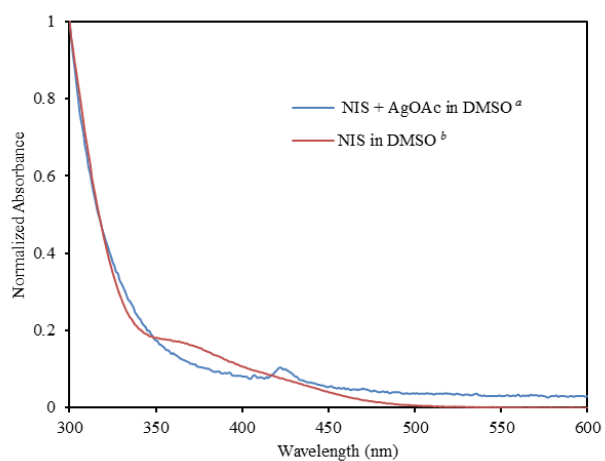

Note: <sup>a</sup>NIS/AgOAc (1:0.6) in DMSO (0.0025 M) under argon atmosphere. <sup>b</sup>NIS in DMSO (0.0025 M) under argon atmosphere.

**[AgCF<sub>3</sub>] experiment (cf. eq 1):**

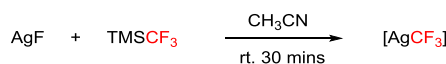

The preparation of [AgCF<sub>3</sub>] was according to literature reported procedure.<sup>4</sup> To an oven-dried glass tube equipped with a stir bar was added AgF (63.5 mg, 0.5 mmol), CH<sub>3</sub>CN (3.0 mL) and TMSCF<sub>3</sub> (71 mg, 0.5 mmol). After the mixture was stirred at rt for 30 min, a dark brown suspension [AgCF<sub>3</sub>] was formed. This suspension was immediately used without further purification. The preparation should be avoided from the light due to the photosensitivity of [AgCF<sub>3</sub>].

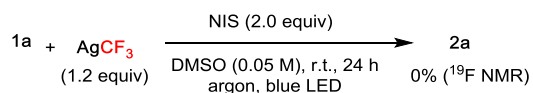

Under argon, to a glass tube equipped with a magnetic stir bar was added alkene **1a** (20.4 mg, 0.1 mmol), NIS (45.0 mg, 0.2 mmol). Then the tube was sealed with a septum, evacuated and refilled with argon for three times. Dry DMSO (2.0 mL) was added via syringe and the solution was again evacuated and refilled with argon for three times. Then the above freshly prepared [AgCF<sub>3</sub>] (0.33 M in CH<sub>3</sub>CN, 0.36 mL, 0.12 mmol) was added dropwise to the above solution. The tube was sealed and placed under a 16 W blue LED light trip at room temperature and stirred for 24 h. The result was analyzed by <sup>19</sup>F NMR using benzotrifluoride as the internal standard.

**Labeling experiment (cf. eq 2):**

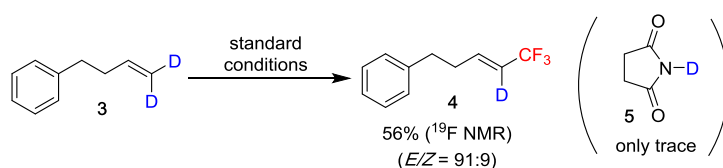

Under argon, to a glass tube equipped with a magnetic stir bar was added alkene **3** (40.2 mg, 0.3 mmol), NIS (135 mg, 0.6 mmol), NaOAc (98.4 mg, 1.2 mmol) and AgOAc (60.2 mg, 0.36 mmol). Then the tube was sealed with a septum, evacuated and refilled with argon for three times. Dry DMSO (3.0 mL) was added via syringe and the solution was again evacuated and refilled with argon for three times. Then Me<sub>3</sub>SiCF<sub>3</sub> (180 μL, 0.4 mmol) was added dropwise to the above solution. The tube was sealed and placed under a 16 W blue LED light trip at room temperature and stirred for 24 h. The yield and *E/Z* ratio (91:9) were determined by <sup>19</sup>F NMR of the crude mixture with benzotrifluoride as the internal standard. Then quenched with H<sub>2</sub>O, extracted with diethyl ether for three times. The organic layers were combined, washed with brine, dried over anhydrous Na<sub>2</sub>SO<sub>4</sub>, filtered and concentrated by rotary evaporator. The crude product was purified by flash column chromatography on silica gel to afford the desired product **4** as a colorless oil (56% <sup>19</sup>F NMR yield, *E/Z* = 93:7). *R*<sub>f</sub> = 0.60 (hexane). Major isomer: **<sup>1</sup>H NMR** (500 MHz, CDCl<sub>3</sub>): δ 7.32 (t, *J* = 7.5 Hz, 2H), 7.23 (t, *J* = 7.5 Hz, 1H), 7.19 (d, *J* = 7.5 Hz, 2H), 6.44-6.40 (m, 1H), 2.77 (t, *J* = 7.8 Hz, 2H), 2.51-2.48 (m, 2H) ppm. **<sup>13</sup>C NMR** (126 MHz, CDCl<sub>3</sub>): δ 140.6, 139.7 (q, *J*<sub>C-F</sub> = 6.6 Hz), 128.7, 128.5, 126.5, 123.1 (q, *J*<sub>C-F</sub> = 269.6 Hz), 119.0 (m), 34.5, 33.3 ppm. **<sup>19</sup>F NMR** (470 MHz, CDCl<sub>3</sub>): δ *E* isomer: -65.00 (s, 3F), *Z* isomer: -59.23 (s, 3F) ppm. **HRMS** *m/z* (EI): calcd. for C<sub>11</sub>H<sub>11</sub>DF<sub>3</sub> [*M*]<sup>+</sup>: 201.0870; found: 201.0872. The isotopic purity of **4** and succinimide **5** was determined by Shimadzu GCMS-QP2010 SE GC MS Spectrometer.

4 Zeng, Y.; Zhang, L.; Zhao, Y.; Ni, C.; Zhao, J.; Hu, J. *J. Am. Chem. Soc.* **2013**, *135*, 2955.

**The EI-MS spectrum of succinimide 5 obtained from the labeling experiment:**

Line#:1 R.Time:6.180(Scan#:219)

MassPeaks:429

RawMode:Single 6.180(219) BasePeak:99.05(12280)

BG Mode:None Group 1 - Event 1 Scan

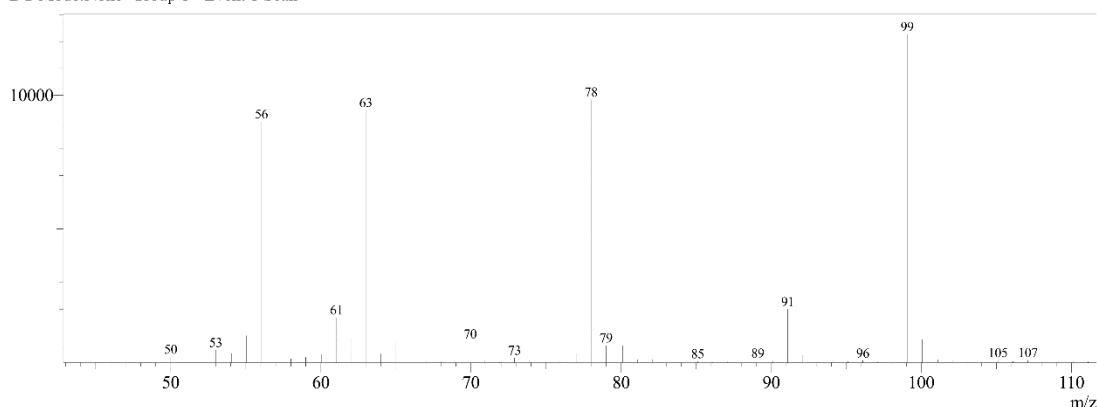

The relative intensity of m/z 99 (93.5% isotopic purity) and m/z 100 are 12280 and 858 respectively.

**The EI-MS spectrum of succinimide 4 obtained from the labeling experiment:**

Line#:1 R.Time:5.660(Scan#:167)

MassPeaks:451

RawMode:Averaged 5.610-5.700(162-171) BasePeak:91.05(350761)

BG Mode:None Group 1 - Event 1 Scan

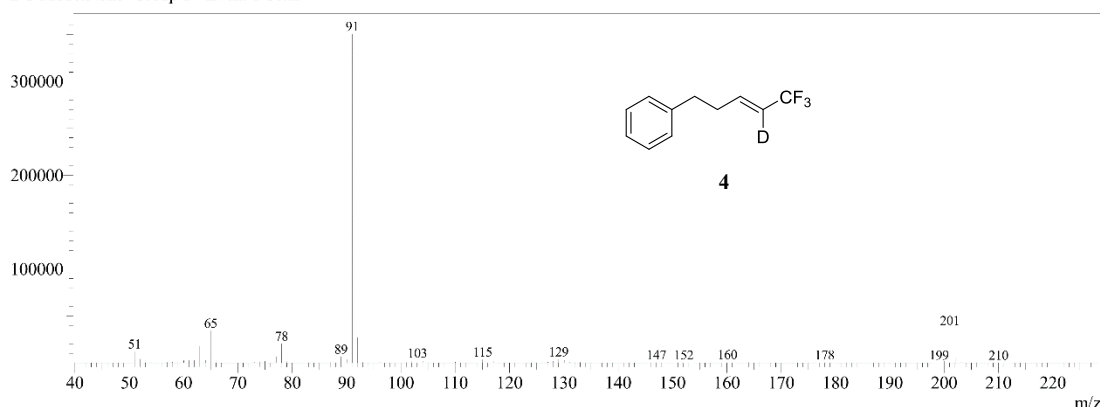

The relative intensity of m/z 200 and m/z 201 (95.3% isotopic purity) are 37049 and 1826 respectively.

**Cyclohexene experiment (cf. eq3):**

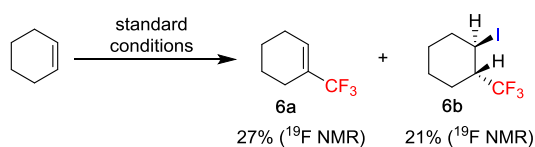

Under argon, to a glass tube equipped with a magnetic stir bar was added NIS (135 mg, 0.6 mmol), NaOAc (98.4 mg, 1.2 mmol) and AgOAc (60.2 mg, 0.36 mmol). Then the tube was sealed with a septum, evacuated and refilled with argon for three times. Dry DMSO (3.0 mL) was added via syringe and the solution was again evacuated and refilled with argon for three times. Then cyclohexene (31  $\mu$ L, 0.3 mmol) and Me<sub>3</sub>SiCF<sub>3</sub> (180  $\mu$ L, 0.4 mmol) was added dropwise to the above solution sequentially. The tube was sealed and placed under a 16 W blue LED light trip at room temperature and stirred for 24 h. The result was analyzed by <sup>19</sup>F NMR using benzotrifluoride as the internal standard. Then quenched with H<sub>2</sub>O,

extracted with diethyl ether for three times. The organic layers were combined, washed with brine, dried over anhydrous Na<sub>2</sub>SO<sub>4</sub>, filtered and concentrated by rotary evaporator. The crude product was purified by flash column chromatography on silica gel to afford the desired product.

**6a:** 27% <sup>19</sup>F NMR yield, <sup>19</sup>F NMR (376 MHz, CDCl<sub>3</sub>): δ -70.67 (s, 3F) ppm.

**6b:** 21 % <sup>19</sup>F NMR yield, R<sub>f</sub> = 0.70 (hexane). <sup>1</sup>H NMR (500 MHz, CDCl<sub>3</sub>): δ 4.40-4.35 (m, 1H), 2.58-2.50 (m, 1H), 2.32-2.27 (m, 1H), 2.11-1.96 (m, 2H), 1.80-1.73 (m, 1H), 1.68-1.57 (m, 2H), 1.50-1.38 (m, 2H) ppm. <sup>19</sup>F NMR (376 MHz, CDCl<sub>3</sub>): δ -69.40 (d, *J* = 7.5 Hz, 3F) ppm. The spectral data are in full accordance with the literature report.<sup>5</sup>

#### Radical clock cyclization experiment (cf. eq 4):

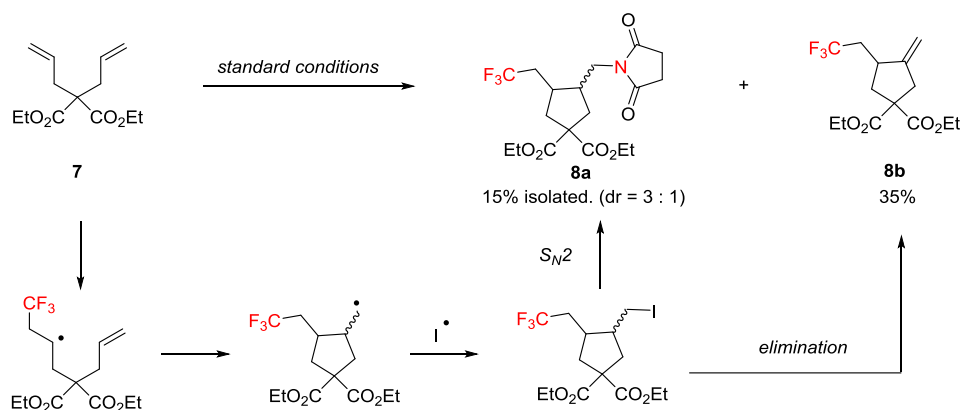

Under argon, to a glass tube equipped with a magnetic stir bar was added alkene **7** (72 mg, 0.3 mmol), NIS (135 mg, 0.6 mmol), NaOAc (98.4 mg, 1.2 mmol) and AgOAc (60.2 mg, 0.36 mmol). Then the tube was sealed with a septum, evacuated and refilled with argon for three times. Dry DMSO (3.0 mL) was added via syringe and the solution was again evacuated and refilled with argon for three times. Then Me<sub>3</sub>SiCF<sub>3</sub> (180 μL, 0.4 mmol) was added dropwise to the above solution sequentially. The tube was sealed and placed under a 16 W blue LED light trip at room temperature and stirred for 24 h. The result was analyzed by <sup>19</sup>F NMR using benzonitrile as the internal standard. Then quenched with H<sub>2</sub>O, extracted with diethyl ether for three times. The organic layers were combined, washed with brine, dried over anhydrous Na<sub>2</sub>SO<sub>4</sub>, filtered and concentrated by rotary evaporator. The crude product was purified by flash column chromatography on silica gel to afford the desired product.

**8a:** (18 mg, 0.044 mmol, 15% yield, dr = 3 : 1), R<sub>f</sub> = 0.30 (hexane : EtOAc = 1 : 1). Major isomer: <sup>1</sup>H NMR (500 MHz, CDCl<sub>3</sub>): δ 4.19-4.14 (m, 4H), 3.48-3.38 (m, 2H), 2.70 (s, 4H), 2.56-2.51 (m, 1H), 2.46-2.39 (m, 1H), 2.38-2.32 (m, 2H), 2.16-2.08 (m, 1H), 2.05-2.00 (m, 2H), 1.98-1.92 (m, 1H), 1.23 (t, *J* = 7.5 Hz, 6H) ppm. <sup>13</sup>C NMR (101 MHz, CDCl<sub>3</sub>): δ 177.4, 172.2, 172.2, 127.1 (q, *J*<sub>C-F</sub> = 278.2 Hz), 62.0, 61.9, 58.4, 43.9, 40.5, 38.9, 38.3, 36.8, 35.4, 33.1 (q, *J*<sub>C-F</sub> = 28.2 Hz), 28.2, 14.1 ppm. <sup>19</sup>F NMR (470 MHz, CDCl<sub>3</sub>): δ -65.32 (t, *J* = 10.6 Hz, 3F) ppm. HRMS *m/z* (APCI): calcd. for C<sub>18</sub>H<sub>25</sub>F<sub>3</sub>NO<sub>6</sub> [M+H]<sup>+</sup>: 408.1629; found: 408.1628.

**8b:** (32.0 mg, 0.11 mmol, 35% yield), R<sub>f</sub> = 0.50 (hexane : EtOAc = 5 : 1). <sup>1</sup>H NMR (500 MHz, CDCl<sub>3</sub>): δ 4.99 (s, 1H), 4.82 (s, 1H), 4.17 (q, *J* = 6.0 Hz, 4H), 3.02 (d, *J* = 17.5 Hz, 1H), 2.89 (d, *J* = 17.0 Hz, 1H), 2.82-2.76 (m, 1H), 2.69-2.64 (m, 1H), 2.50-2.40 (m, 1H), 2.07-1.99 (m, 1H), 1.91 (t, *J* = 11.8 Hz, 1H), 1.21 (t, *J* = 7.0 Hz, 6H) ppm. <sup>13</sup>C NMR (101 MHz, CDCl<sub>3</sub>): δ 171.4, 150.0, 126.8 (q, *J*<sub>C-F</sub> = 278.2 Hz), 107.2, 61.7, 58.4, 40.2, 39.8, 37.9 (q, *J*<sub>C-F</sub> = 28.1 Hz), 36.3 (q, *J*<sub>C-F</sub> = 2.6 Hz), 14.0 ppm. <sup>19</sup>F

5 Beniazza, R.; Molton, F.; Duboc, C.; Tron, A.; McClenaghan, N. D.; Lastecoueres, D.; Vincent, J. M. *Chem. Commun.* **2015**, 51, 9571–9574.

**NMR** (470 MHz, CDCl<sub>3</sub>):  $\delta$  -65.58 (t,  $J$  = 11.0 Hz, 3F) ppm. The spectral data are in full accordance with the literature report.<sup>6</sup>

**Radical clock ring-opening experiment (cf. eq 5):**

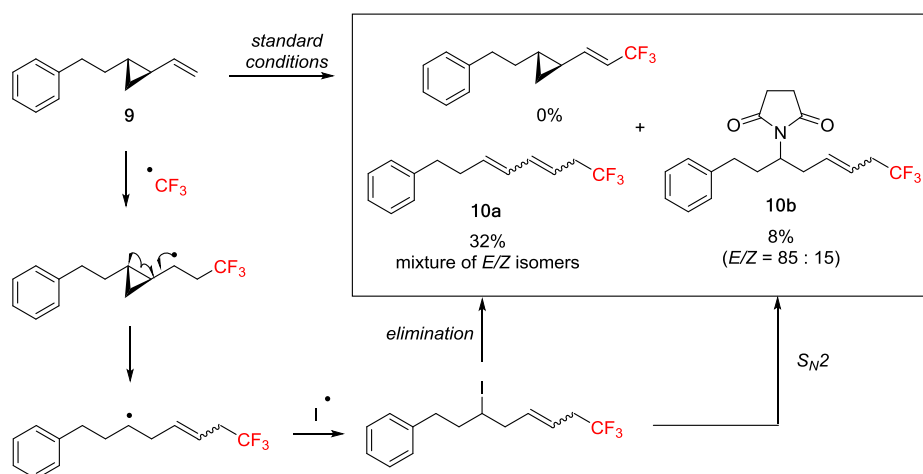

Under argon, to a glass tube equipped with a magnetic stir bar was added alkene **9** (51.6 mg, 0.3 mmol), NIS (135 mg, 0.6 mmol), NaOAc (98.4 mg, 1.2 mmol) and AgOAc (60.2 mg, 0.36 mmol). Then the tube was sealed with a septum, evacuated and refilled with argon for three times. Dry DMSO (3.0 mL) was added via syringe and the solution was again evacuated and refilled with argon for three times. Then Me<sub>3</sub>SiCF<sub>3</sub> (180  $\mu$ L, 0.4 mmol) was added dropwise to the above solution sequentially. The tube was sealed and placed under a 16 W blue LED light trip at room temperature and stirred for 24 h. The result was analyzed by <sup>19</sup>F NMR using benzonitrile as the internal standard. Then quenched with H<sub>2</sub>O, extracted with diethyl ether for three times. The organic layers were combined, washed with brine, dried over anhydrous Na<sub>2</sub>SO<sub>4</sub>, filtered and concentrated by rotary evaporator. The crude product was purified by flash column chromatography on silica gel to afford the desired product.

**10a:** (23.0 mg, 0.096 mmol, 32% yield),  $R_f$  = 0.40 (hexane). Major isomer: **<sup>1</sup>H NMR** (400 MHz, CDCl<sub>3</sub>):  $\delta$  7.31 (t,  $J$  = 7.2 Hz, 2H), 7.23-7.19 (m, 3H), 6.23-6.20 (m, 1H), 6.13-6.06 (m, 1H), 5.81-5.73 (m, 1H), 5.53-5.45 (m, 1H), 2.89-2.79 (m, 2H), 2.73 (t,  $J$  = 7.8 Hz, 2H), 2.44 (t,  $J$  = 8.0 Hz, 2H) ppm. **<sup>13</sup>C NMR** (126 MHz, CDCl<sub>3</sub>):  $\delta$  141.7, 137.0, 135.1, 129.8, 128.5, 128.5, 126.1, 126.1 (q,  $J_{\text{C-F}}$  = 276.3 Hz), 118.5 (q,  $J_{\text{C-F}}$  = 3.5 Hz), 37.4 (q,  $J_{\text{C-F}}$  = 29.9 Hz), 35.7, 34.5 ppm. **<sup>19</sup>F NMR** (376 MHz, CDCl<sub>3</sub>):  $\delta$  -67.41 (t,  $J$  = 10.7 Hz, 3F) ppm. **HRMS**  $m/z$  (APCI): calcd. for C<sub>14</sub>H<sub>15</sub>F<sub>3</sub> [M+H]<sup>+</sup> : 241.1199; found: 241.1198.

**10b:** (8.0 mg, 0.024 mmol, 8% yield),  $R_f$  = 0.30 (hexane : EtOAc = 2 : 1). Major isomer: **<sup>1</sup>H NMR** (400 MHz, CDCl<sub>3</sub>):  $\delta$  7.26 (t,  $J$  = 7.4 Hz, 2H), 7.18-7.13 (m, 3H), 5.57-5.50 (m, 1H), 5.40-6.33 (m, 1H), 4.27-4.17 (m, 1H), 2.83-2.61 (m, 4H), 2.41-2.22 (m, 1H), 2.55-2.46 (m, 2H), 2.36 (s, 4H), 1.97-1.88 (m, 1H) ppm. **<sup>13</sup>C NMR** (126 MHz, CDCl<sub>3</sub>):  $\delta$  177.8, 144.1, 134.2, 128.5, 128.4, 126.2, 126.0 (q,  $J_{\text{C-F}}$  = 276.9 Hz), 121.4 (q,  $J_{\text{C-F}}$  = 3.5 Hz), 52.1, 37.3 (q,  $J_{\text{C-F}}$  = 29.6 Hz), 35.1, 33.5, 31.7, 27.8 ppm. **<sup>19</sup>F NMR** (376 MHz, CDCl<sub>3</sub>):  $\delta$  -67.78 (t,  $J$  = 10.7 Hz, 3F) ppm. **HRMS**  $m/z$  (APCI): calcd. for C<sub>18</sub>H<sub>20</sub>F<sub>3</sub>NO<sub>2</sub> [M+H]<sup>+</sup> : 340.1519; found: 340.1518.

## Optimization Studies:

**Table S1. Optimization studies (part 1).**

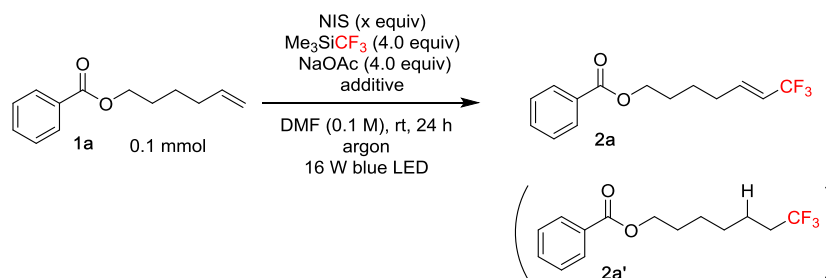

| entry                 | x                | additive (equiv)                                                | yield ( <i>E/Z</i> ) <sup>a</sup>                  |
|-----------------------|------------------|-----------------------------------------------------------------|----------------------------------------------------|
| 1                     | 3.0              | none                                                            | <b>2a</b> 38% (94:6); <b>2a'</b> 5%                |
| 2 <sup>b</sup>        | 3.0              | none                                                            | <b>2a</b> 0%; <b>2a'</b> 0%                        |
| 3                     | 3.0 <sup>c</sup> | none                                                            | <b>2a</b> 0%; <b>2a'</b> 0%                        |
| 4                     | 3.0 <sup>d</sup> | none                                                            | <b>2a</b> 0%; <b>2a'</b> 0%                        |
| 5                     | 3.0 <sup>e</sup> | none                                                            | <b>2a</b> 0%; <b>2a'</b> 0%                        |
| 6                     | 3.0 <sup>f</sup> | none                                                            | <b>2a</b> trace; <b>2a'</b> 0%                     |
| 7                     | 4.0              | none                                                            | <b>2a</b> 62% (92:8); <b>2a'</b> 6%                |
| 8 <sup>g</sup>        | 4.0              | none                                                            | <b>2a</b> 0%; <b>2a'</b> 0%                        |
| 9                     | 5.0              | none                                                            | <b>2a</b> 42% (93:7); <b>2a'</b> 4%                |
| 10                    | 3.0              | Ru(bpy) <sub>3</sub> Cl <sub>2</sub> ·6H <sub>2</sub> O (0.025) | <b>2a</b> 53% (93:7); <b>2a'</b> 5%                |
| 11                    | 3.0              | Ru(bpy) <sub>3</sub> Cl <sub>2</sub> ·6H <sub>2</sub> O (0.05)  | <b>2a</b> 45% (93:7); <b>2a'</b> 5%                |
| 12                    | 3.0              | Ru(bpy) <sub>3</sub> Cl <sub>2</sub> ·6H <sub>2</sub> O (0.10)  | <b>2a</b> 15% (93:7); <b>2a'</b> 1%                |
| 13                    | 3.0              | AgNO <sub>3</sub> (0.2)                                         | <b>2a</b> 38% (93:7); <b>2a'</b> 2%                |
| 14                    | 3.0              | AgNO <sub>3</sub> (0.4)                                         | <b>2a</b> 39% (93:7); <b>2a'</b> 2%                |
| 15                    | 3.0              | AgNO <sub>3</sub> (1.0)                                         | <b>2a</b> 73% (93:7); <b>2a'</b> 5%                |
| 16 <sup>h</sup>       | 3.0              | AgNO <sub>3</sub> (1.2)                                         | <b>2a</b> 73% (93:7); <b>2a'</b> 5%                |
| 17                    | 3.0              | AgNO <sub>3</sub> (2.0)                                         | <b>2a</b> 74% (92:8); <b>2a'</b> 5%                |
| 18                    | 3.0              | AgF (1.0)                                                       | <b>2a</b> 50% (94:6); <b>2a'</b> 6%                |
| 19                    | 3.0              | Ag <sub>2</sub> O (1.0)                                         | <b>2a</b> 63% (93:7); <b>2a'</b> 5%                |
| 20                    | 3.0              | AgOAc (1.0)                                                     | <b>2a</b> 73% (92:8); <b>2a'</b> 6%                |
| <b>21<sup>h</sup></b> | <b>3.0</b>       | <b>AgOAc (1.2)</b>                                              | <b>2a</b> <b>73% (93:7)</b> ; <b>2a'</b> <b>5%</b> |
| 22                    | 3.0              | Ag <sub>2</sub> CO <sub>3</sub> (1.0)                           | <b>2a</b> 49% (94:6); <b>2a'</b> 1%                |
| 23                    | 3.0              | AgPF <sub>6</sub> (1.0)                                         | <b>2a</b> 15% (94:6); <b>2a'</b> 5%                |
| 24                    | 3.0              | AgOTf (1.0)                                                     | <b>2a</b> 18% (93:7); <b>2a'</b> 2%                |
| 25                    | 3.0              | CuCl (1.0)                                                      | <b>2a</b> trace; <b>2a'</b> 2%                     |
| 26                    | 3.0              | FeCl <sub>3</sub> (1.0)                                         | <b>2a</b> 0%; <b>2a'</b> 0%                        |
| 27                    | 3.0              | FeCl <sub>2</sub> (1.0)                                         | <b>2a</b> 0%; <b>2a'</b> 0%                        |
| 28 <sup>i</sup>       | 3.0              | AgNO <sub>3</sub> (1.0)                                         | <b>2a</b> 66% (92:8); <b>2a'</b> 6%                |
| 29 <sup>j</sup>       | 3.0              | AgNO <sub>3</sub> (1.0)                                         | <b>2a</b> 64% (91:9); <b>2a'</b> 5%                |
| 30 <sup>k</sup>       | 3.0              | AgNO <sub>3</sub> (1.0)                                         | <b>2a</b> 26% (92:8); <b>2a'</b> 5%                |

<sup>a</sup>Yield and *E/Z* ratio were determined by <sup>19</sup>F NMR analysis of the crude mixture using benzotrifluoride as the internal standard. <sup>b</sup>Open to air. <sup>c</sup>Used *N*-bromosuccinimide (NBS) instead. <sup>d</sup>Used *N*-chlorosuccinimide (NCS) instead. <sup>e</sup>Used iodine (I<sub>2</sub>) instead. <sup>f</sup>Used iodo- monoacetate (IOAc) instead.

<sup>g</sup>Added TEMPO (2.0 equiv). <sup>h</sup>Improved reproducibility. <sup>i</sup>TMSCF<sub>3</sub>/NaOAc (5.0/5.0 equiv).  
<sup>j</sup>TMSCF<sub>3</sub>/NaOAc (3.0/3.0 equiv). <sup>k</sup>TMSCF<sub>3</sub>/NaOAc (2.0/2.0 equiv).

**Table S2. Optimization studies (part 2).**

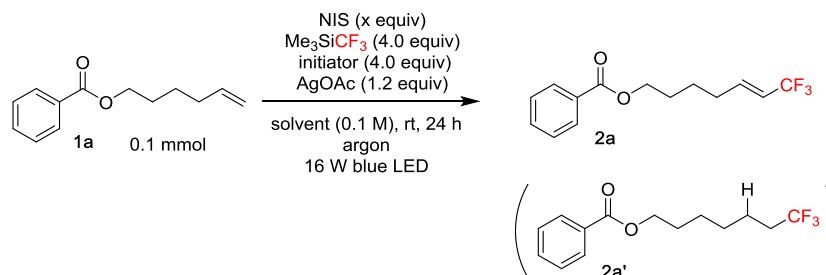

| entry           | x          | initiator                        | solvent     | yield ( <i>E/Z</i> ) <sup>a</sup>   |
|-----------------|------------|----------------------------------|-------------|-------------------------------------|
| 1               | 3.0        | NaOAc                            | DMF         | <b>2a</b> 73% (93:7); <b>2a'</b> 5% |
| 2               | 3.0        | NaOAc                            | DMSO        | <b>2a</b> 76% (93:7); <b>2a'</b> 0% |
| 3               | 3.0        | NaOAc                            | MeCN        | <b>2a</b> 33% (96:4); <b>2a'</b> 0% |
| 4               | 3.0        | NaOAc                            | 1,4-dioxane | <b>2a</b> 0%; <b>2a'</b> 0%         |
| <b>5</b>        | <b>2.0</b> | <b>NaOAc</b>                     | <b>DMSO</b> | <b>2a</b> 76% (93:7); <b>2a'</b> 0% |
| 6               | 2.0        | Na <sub>2</sub> CO <sub>3</sub>  | DMSO        | <b>2a</b> 69% (93:7); <b>2a'</b> 0% |
| 7               | 2.0        | NaHCO <sub>3</sub>               | DMSO        | <b>2a</b> 56% (91:9); <b>2a'</b> 0% |
| 8               | 2.0        | sodium phenoxide                 | DMSO        | <b>2a</b> 0%; <b>2a'</b> 0%         |
| 9               | 2.0        | sodium benzoate                  | DMSO        | <b>2a</b> 74% (93:7); <b>2a'</b> 0% |
| 10              | 2.0        | NaH <sub>2</sub> PO <sub>4</sub> | DMSO        | <b>2a</b> 44% (94:6); <b>2a'</b> 0% |
| 11              | 2.0        | Na <sub>2</sub> HPO <sub>4</sub> | DMSO        | <b>2a</b> trace; <b>2a'</b> 0%      |
| 12              | 2.0        | NaF                              | DMSO        | <b>2a</b> trace; <b>2a'</b> 0%      |
| 13              | 2.0        | NH <sub>4</sub> OAc              | DMSO        | <b>2a</b> trace; <b>2a'</b> 0%      |
| 14              | 2.0        | Bu <sub>4</sub> NOAc             | DMSO        | <b>2a</b> 49% (92:8); <b>2a'</b> 0% |
| 15              | 2.0        | KOAc                             | DMSO        | <b>2a</b> 75% (92:8); <b>2a'</b> 0% |
| 16              | 2.0        | LiOAc                            | DMSO        | <b>2a</b> 75% (92:8); <b>2a'</b> 0% |
| 17              | 2.0        | K <sub>2</sub> CO <sub>3</sub>   | DMSO        | <b>2a</b> trace; <b>2a'</b> 0%      |
| 18              | 2.0        | Et <sub>3</sub> N                | DMSO        | <b>2a</b> trace; <b>2a'</b> 0%      |
| 19 <sup>b</sup> | 2.0        | NaOAc                            | DMSO        | <b>2a</b> 61% (95:5); <b>2a'</b> 0% |
| 20 <sup>c</sup> | 2.0        | NaOAc                            | DMSO        | <b>2a</b> 74% (93:7); <b>2a'</b> 0% |
| 21 <sup>d</sup> | 2.0        | NaOAc                            | DMSO        | <b>2a</b> 68% (94:6); <b>2a'</b> 0% |
| 22 <sup>e</sup> | 2.0        | NaOAc                            | DMSO        | <b>2a</b> 72% (92:8); <b>2a'</b> 0% |

<sup>a</sup>Yield and *E/Z* ratio were determined by <sup>19</sup>F NMR analysis of the crude mixture using benzotrifluoride as the internal standard. <sup>b</sup>Used 4 W blue LED instead. <sup>c</sup>Used 24 W white CFL bulb instead. <sup>d</sup>0.2 M in DMSO. <sup>e</sup>0.05 M in DMSO.

**Table S3. Control experiments.**

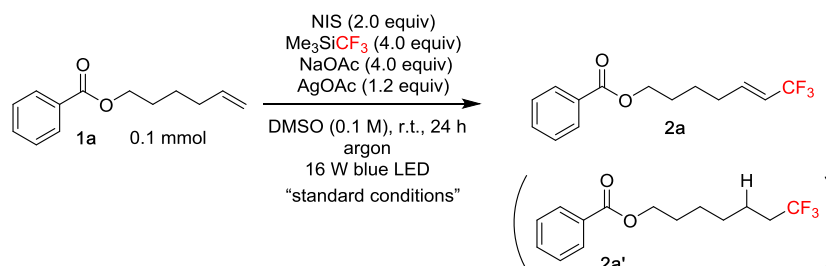

| entry          | change from the "standard conditions" | yield ( <i>E/Z</i> ) <sup>a</sup>      |
|----------------|---------------------------------------|----------------------------------------|
| 1              | none                                  | <b>2a</b> 76% (93:7); <b>2a'</b> 0%    |
| 2 <sup>b</sup> | no NIS                                | <b>2a</b> 0%; <b>2a'</b> 0%            |
| 3              | 1.0 equiv NIS                         | <b>2a</b> 37% (94:6); <b>2a'</b> trace |
| 4              | no AgOAc                              | <b>2a</b> 7%; <b>2a'</b> 3%            |
| 5              | no NaOAc                              | <b>2a</b> 30% (94:6); <b>2a'</b> 0%    |
| 6              | no NaOAc, 5.2 equiv AgOAc             | <b>2a</b> 15% (93:7); <b>2a'</b> 4%    |
| 7              | no irradiation                        | <b>2a</b> 8%; <b>2a'</b> 0%            |
| 8              | no irradiation, 80 °C                 | <b>2a</b> 13% (92:8); <b>2a'</b> 0%    |

<sup>a</sup>Yield and *E/Z* ratio were determined by <sup>19</sup>F NMR analysis of the crude mixture using benzotrifluoride as the internal standard. <sup>b</sup>Detected the formation of AgCF<sub>3</sub> mainly.



### Characterization Data:

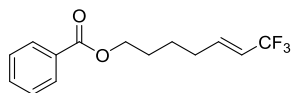

**2a: 7,7,7-trifluorohept-5-en-1-yl benzoate.** Prepared according to the general procedure. Reaction was run using **1a** (61.2 mg, 0.3 mmol), NIS (135 mg, 0.6 mmol), AgOAc (60.1 mg, 0.36 mmol), Me<sub>3</sub>SiCF<sub>3</sub> (180  $\mu$ L, 1.2 mmol), NaOAc (98.4 mg, 1.2 mmol) and DMSO (3.0 mL). The *E/Z* ratio (94:6) was determined by <sup>19</sup>F NMR of the crude mixture with benzotrifluoride as the internal standard. The product was purified by flash column chromatography on silica gel (hexane/EtOAc) and obtained a colorless oil (0.25 mmol, 68.5 mg, 84 %, *E/Z* = 92:8), *R*<sub>f</sub> = 0.60 (hexane : EtOAc = 5 : 1). E isomer: <sup>1</sup>H NMR (400 MHz, CDCl<sub>3</sub>):  $\delta$  8.05 (d, *J* = 8.0 Hz, 2H), 7.56 (t, *J* = 8.0 Hz, 1H), 7.44 (t, *J* = 7.6 Hz, 2H), 6.42-6.35 (m, 1H), 5.69-5.60 (m, 1H), 4.34 (t, *J* = 6.4 Hz, 2H), 2.26-2.21 (m, 2H), 1.84-1.76 (m, 2H), 1.65-1.58 (m, 2H) ppm. <sup>13</sup>C NMR (101 MHz, CDCl<sub>3</sub>):  $\delta$  166.7, 140.1 (q, *J*<sub>C-F</sub> = 6.5 Hz), 133.1, 130.4, 129.6, 128.5, 123.1 (q, *J*<sub>C-F</sub> = 270.0 Hz), 119.0 (q, *J*<sub>C-F</sub> = 33.4 Hz), 64.6, 31.1, 28.2, 24.6 ppm. <sup>19</sup>F NMR (376 MHz, CDCl<sub>3</sub>):  $\delta$  E isomer: -64.86 (s, 3F), Z isomer: -58.94 (s, 3F) ppm. The spectral data are in full accordance with the literature report.<sup>7</sup>

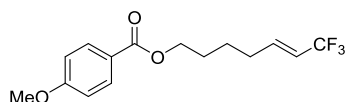

**2b: 7,7,7-trifluorohept-5-en-1-yl 4-methoxybenzoate.** Prepared according to the general procedure. Reaction was run using **1b** (70.2 mg, 0.3 mmol), NIS (135 mg, 0.6 mmol), AgOAc (60.1 mg, 0.36 mmol), Me<sub>3</sub>SiCF<sub>3</sub> (180  $\mu$ L, 1.2 mmol), NaOAc (98.4 mg, 1.2 mmol) and DMSO (3.0 mL). The *E/Z* ratio (94:6) was determined by <sup>19</sup>F NMR of the crude mixture with benzotrifluoride as the internal standard. The product was purified by flash column chromatography on silica gel (hexane/EtOAc) and obtained a colorless oil (0.26 mmol, 77.0 mg, 85 %, *E/Z* = 92:8), *R*<sub>f</sub> = 0.40 (hexane : EtOAc = 5 : 1). E isomer: <sup>1</sup>H NMR (400 MHz, CDCl<sub>3</sub>):  $\delta$  7.98 (d, *J* = 8.8 Hz, 2H), 6.90 (d, *J* = 8.8 Hz, 2H), 6.39-6.35 (m, 1H), 5.67-5.58 (m, 1H), 4.29 (t, *J* = 6.4 Hz, 2H), 3.83 (s, 3H), 2.28-2.15 (m, 2H), 1.80-1.73 (m, 2H), 1.62-1.55 (m, 2H) ppm. <sup>13</sup>C NMR (101 MHz, CDCl<sub>3</sub>):  $\delta$  166.4, 163.4, 140.2 (q, *J*<sub>C-F</sub> = 6.6 Hz), 131.6, 123.1 (q, *J*<sub>C-F</sub> = 270.0 Hz), 122.8, 118.9 (q, *J*<sub>C-F</sub> = 33.4 Hz), 113.7, 64.2, 55.4, 31.1, 28.3, 24.6 ppm. <sup>19</sup>F NMR (376 MHz, CDCl<sub>3</sub>):  $\delta$  E isomer: -64.84 (s, 3F), Z isomer: -58.93 (s, 3F) ppm. HRMS *m/z* (APCI): calcd. for C<sub>15</sub>H<sub>18</sub>F<sub>3</sub>O<sub>3</sub> [M+H]<sup>+</sup> : 303.1203; found: 303.1202.

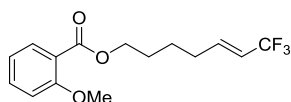

**2c: 7,7,7-trifluorohept-5-en-1-yl 2-methoxybenzoate.** Prepared according to the general procedure. Reaction was run using **1c** (70.2 mg, 0.3 mmol), NIS (135 mg, 0.6 mmol), AgOAc (60.1 mg, 0.36 mmol), Me<sub>3</sub>SiCF<sub>3</sub> (180  $\mu$ L, 1.2 mmol), NaOAc (98.4 mg, 1.2 mmol) and DMSO (3.0 mL). The *E/Z* ratio (93:7) was determined by <sup>19</sup>F NMR of the crude mixture with benzotrifluoride as the internal standard. The product was purified by flash column chromatography on silica gel (hexane/EtOAc) and obtained a colorless oil (0.25 mmol, 76.1 mg, 84 %, *E/Z* = 92:8), *R*<sub>f</sub> = 0.40 (hexane : EtOAc = 5 : 1). E isomer: <sup>1</sup>H NMR (400 MHz, CDCl<sub>3</sub>):  $\delta$  7.76 (d, *J* = 8.0 Hz, 2H), 7.44 (d, *J* = 8.0 Hz, 2H), 6.97-6.94 (m, 2H), 6.40-

6.33 (m, 1H), 5.66-5.59 (m, 1H), 4.29 (t,  $J = 6.4$  Hz, 2H), 3.86 (s, 3H), 2.28-2.15 (m, 2H), 1.79-1.72 (m, 2H), 1.62-1.55 (m, 2H) ppm.  $^{13}\text{C}$  NMR (101 MHz,  $\text{CDCl}_3$ ):  $\delta$  166.3, 159.1, 140.2 (q,  $J_{\text{C-F}} = 6.5$  Hz), 133.5, 131.5, 123.1 (q,  $J_{\text{C-F}} = 270.0$  Hz), 120.2, 120.1, 118.7 (q,  $J_{\text{C-F}} = 33.3$  Hz), 112.0, 64.3, 55.8, 30.9, 28.1, 24.5 ppm.  $^{19}\text{F}$  NMR (376 MHz,  $\text{CDCl}_3$ ):  $\delta$  E isomer: -64.86 (s, 3F), Z isomer: -58.94 (s, 3F) ppm. HRMS  $m/z$  (APCI): calcd. for  $\text{C}_{15}\text{H}_{18}\text{F}_3\text{O}_3$   $[\text{M}+\text{H}]^+$ : 303.1203; found: 303.1202.

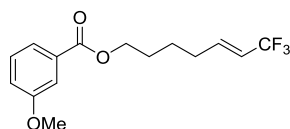

**2d: 7,7,7-trifluorohept-5-en-1-yl 3-methoxybenzoate.** Prepared according to the general procedure. Reaction was run using **1d** (70.2 mg, 0.3 mmol), NIS (135 mg, 0.6 mmol), AgOAc (60.1 mg, 0.36 mmol),  $\text{Me}_3\text{SiCF}_3$  (180  $\mu\text{L}$ , 1.2 mmol), NaOAc (98.4 mg, 1.2 mmol) and DMSO (3.0 mL). The *E/Z* ratio (93:7) was determined by  $^{19}\text{F}$  NMR of the crude mixture with benzotrifluoride as the internal standard. The product was purified by flash column chromatography on silica gel (hexane/EtOAc) and obtained a colorless oil (0.20 mmol, 60.0 mg, 66 %, *E/Z* = 91:9,  $R_f$  = 0.40 (hexane : EtOAc = 5 : 1). E isomer:  $^1\text{H}$  NMR (400 MHz,  $\text{CDCl}_3$ ):  $\delta$  7.63 (d,  $J = 7.6$  Hz, 2H), 7.56 (s, 1H), 7.34 (t,  $J = 8.0$  Hz, 1H), 7.34 (dd,  $J = 8.4$  Hz,  $J = 2.0$  Hz, 1H), 6.42-6.34 (m, 1H), 5.68-5.61 (m, 1H), 4.33 (t,  $J = 6.4$  Hz, 2H), 3.84 (s, 3H), 2.26-2.20 (m, 2H), 1.83-1.76 (m, 2H), 1.64-1.57 (m, 2H) ppm.  $^{13}\text{C}$  NMR (101 MHz,  $\text{CDCl}_3$ ):  $\delta$  166.6, 159.7, 140.1 (q,  $J_{\text{C-F}} = 6.5$  Hz), 131.7, 129.5, 123.1 (q,  $J_{\text{C-F}} = 270.1$  Hz), 122.0, 119.4, 119.0 (q,  $J_{\text{C-F}} = 33.3$  Hz), 114.3, 64.7, 55.5, 31.1, 28.2, 24.6 ppm.  $^{19}\text{F}$  NMR (376 MHz,  $\text{CDCl}_3$ ):  $\delta$  E isomer: -64.85 (s, 3F), Z isomer: -58.93 (s, 3F) ppm. HRMS  $m/z$  (APCI): calcd. for  $\text{C}_{15}\text{H}_{18}\text{F}_3\text{O}_3$   $[\text{M}+\text{H}]^+$ : 303.1203; found: 303.1203.

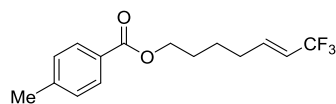

**2e: 7,7,7-trifluorohept-5-en-1-yl 4-methylbenzoate.** Prepared according to the general procedure. Reaction was run using **1e** (65.4 mg, 0.3 mmol), NIS (135 mg, 0.6 mmol), AgOAc (60.1 mg, 0.36 mmol),  $\text{Me}_3\text{SiCF}_3$  (180  $\mu\text{L}$ , 1.2 mmol), NaOAc (98.4 mg, 1.2 mmol) and DMSO (3.0 mL). The *E/Z* ratio (96:4) was determined by  $^{19}\text{F}$  NMR of the crude mixture with benzotrifluoride as the internal standard. The product was purified by flash column chromatography on silica gel (hexane/EtOAc) and obtained a colorless oil (0.25 mmol, 70.4 mg, 82 %, *E/Z* = 93:7,  $R_f$  = 0.60 (hexane : EtOAc = 5 : 1). E isomer:  $^1\text{H}$  NMR (400 MHz,  $\text{CDCl}_3$ ):  $\delta$  7.83 (d,  $J = 8.0$  Hz, 2H), 7.14 (d,  $J = 8.0$  Hz, 2H), 6.32-6.25 (m, 1H), 5.86-5.50 (m, 1H), 4.22 (t,  $J = 6.4$  Hz, 2H), 2.30 (s, 3H), 2.12-2.10 (m, 2H), 1.73-1.66 (m, 2H), 1.54-1.47 (m, 2H) ppm.  $^{13}\text{C}$  NMR (101 MHz,  $\text{CDCl}_3$ ):  $\delta$  166.7, 143.7, 140.2 (q,  $J_{\text{C-F}} = 6.6$  Hz), 129.6, 129.2, 127.6, 123.1 (q,  $J_{\text{C-F}} = 270.0$  Hz), 118.9 (q,  $J_{\text{C-F}} = 33.4$  Hz), 64.3, 31.1, 28.2, 24.6, 21.7 ppm.  $^{19}\text{F}$  NMR (376 MHz,  $\text{CDCl}_3$ ):  $\delta$  E isomer: -64.85 (s, 3F), Z isomer: -58.94 (s, 3F) ppm. HRMS  $m/z$  (APCI): calcd. for  $\text{C}_{15}\text{H}_{18}\text{F}_3\text{O}_2$   $[\text{M}+\text{H}]^+$ : 287.1253; found: 287.1253.

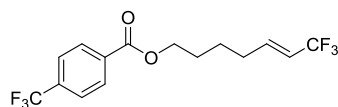

**2f: 7,7,7-trifluorohept-5-en-1-yl 4-(trifluoromethyl)benzoate.** Prepared according to the general procedure. Reaction was run using **1f** (81.6 mg, 0.3 mmol), NIS (135 mg, 0.6 mmol), AgOAc (60.1 mg, 0.36 mmol),  $\text{Me}_3\text{SiCF}_3$  (180  $\mu\text{L}$ , 1.2 mmol), NaOAc (98.4 mg, 1.2 mmol) and DMSO (3.0 mL). The *E/Z*

ratio (96:4) was determined by  $^{19}\text{F}$  NMR of the crude mixture with benzotrifluoride as the internal standard. The product was purified by flash column chromatography on silica gel (hexane/EtOAc) and obtained a colorless oil (0.20 mmol, 69.4 mg, 68 %,  $E/Z$  = 93:7),  $R_f$  = 0.60 (hexane : EtOAc = 5 : 1). E isomer:  $^1\text{H}$  NMR (400 MHz,  $\text{CDCl}_3$ ):  $\delta$  8.14 (d,  $J$  = 8.0 Hz, 2H), 7.70 (d,  $J$  = 8.0 Hz, 2H), 6.42-6.34 (m, 1H), 5.69-5.60 (m, 1H), 4.37 (t,  $J$  = 6.4 Hz, 2H), 2.27-2.21 (m, 2H), 1.86-1.78 (m, 2H), 1.65-1.58 (m, 2H) ppm.  $^{13}\text{C}$  NMR (101 MHz,  $\text{CDCl}_3$ ):  $\delta$  165.5, 140.0 (q,  $J_{\text{C-F}}$  = 6.6 Hz), 134.6 (q,  $J_{\text{C-F}}$  = 32.7 Hz), 133.6, 130.1, 125.5 (q,  $J_{\text{C-F}}$  = 3.8 Hz), 123.8 (q,  $J_{\text{C-F}}$  = 273.7 Hz), 123.1 (q,  $J_{\text{C-F}}$  = 270.1 Hz), 119.1 (q,  $J_{\text{C-F}}$  = 33.4 Hz), 65.2, 31.1, 28.2, 24.6 ppm.  $^{19}\text{F}$  NMR (376 MHz,  $\text{CDCl}_3$ ):  $\delta$  E isomer: -63.98 (s, 3F), -64.86 (s, 3F), Z isomer: -63.96 (s, 3F), -58.91 (s, 3F) ppm. HRMS  $m/z$  (APCI): calcd. for  $\text{C}_{15}\text{H}_{15}\text{F}_6\text{O}_2$   $[\text{M}+\text{H}]^+$  : 341.0971; found: 341.0970.

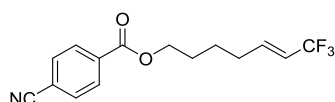

**2g: 7,7,7-trifluorohept-5-en-1-yl 4-cyanobenzoate.** Prepared according to the general procedure. Reaction was run using **1g** (68.7 mg, 0.3 mmol), NIS (135 mg, 0.6 mmol), AgOAc (60.1 mg, 0.36 mmol),  $\text{Me}_3\text{SiCF}_3$  (180  $\mu\text{L}$ , 1.2 mmol), NaOAc (98.4 mg, 1.2 mmol) and DMSO (3.0 mL). The  $E/Z$  ratio (96:4) was determined by  $^{19}\text{F}$  NMR of the crude mixture with benzotrifluoride as the internal standard. The product was purified by flash column chromatography on silica gel (hexane/EtOAc) and obtained a colorless oil (0.17 mmol, 51.7 mg, 58 %,  $E/Z$  = 93:7),  $R_f$  = 0.20 (hexane : EtOAc = 8 : 1). Major isomer:  $^1\text{H}$  NMR (400 MHz,  $\text{CDCl}_3$ ):  $\delta$  8.11 (d,  $J$  = 8.4 Hz, 2H), 7.73 (d,  $J$  = 8.4 Hz, 2H), 6.40-6.33 (m, 1H), 5.67-5.60 (m, 1H), 4.35 (t,  $J$  = 6.4 Hz, 2H), 2.23-2.20 (m, 2H), 1.84-1.77 (m, 2H), 1.63-1.56 (m, 2H) ppm.  $^{13}\text{C}$  NMR (101 MHz,  $\text{CDCl}_3$ ):  $\delta$  165.0, 139.9 (q,  $J_{\text{C-F}}$  = 6.5 Hz), 134.1, 132.3, 130.1, 123.0 (q,  $J_{\text{C-F}}$  = 270.1 Hz), 119.0 (q,  $J_{\text{C-F}}$  = 33.4 Hz), 118.0, 116.4, 65.4, 31.0, 28.1, 24.5 ppm.  $^{19}\text{F}$  NMR (376 MHz,  $\text{CDCl}_3$ ):  $\delta$  E isomer: -64.85 (s, 3F), Z isomer: -58.91 (s, 3F) ppm. The spectral data are in full accordance with the literature report.<sup>8</sup>

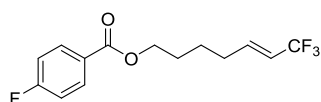

**2h: 7,7,7-trifluorohept-5-en-1-yl 4-fluorobenzoate.** Prepared according to the general procedure. Reaction was run using **1h** (66.6 mg, 0.3 mmol), NIS (135 mg, 0.6 mmol), AgOAc (60.1 mg, 0.36 mmol),  $\text{Me}_3\text{SiCF}_3$  (180  $\mu\text{L}$ , 1.2 mmol), NaOAc (98.4 mg, 1.2 mmol) and DMSO (3.0 mL). The  $E/Z$  ratio (95:5) was determined by  $^{19}\text{F}$  NMR of the crude mixture with benzotrifluoride as the internal standard. The product was purified by flash column chromatography on silica gel (hexane/EtOAc) and obtained a colorless oil (0.25 mmol, 71.3 mg, 82 %,  $E/Z$  = 92:8),  $R_f$  = 0.60 (hexane : EtOAc = 5 : 1). E isomer:  $^1\text{H}$  NMR (400 MHz,  $\text{CDCl}_3$ ):  $\delta$  8.06-8.02 (m, 2H), 7.10 (t,  $J$  = 8.6 Hz, 2H), 6.40-6.35 (m, 1H), 5.68-5.59 (m, 1H), 4.32 (t,  $J$  = 6.4 Hz, 2H), 2.25-2.21 (m, 2H), 1.82-1.75 (m, 2H), 1.63-1.56 (m, 2H) ppm.  $^{13}\text{C}$  NMR (101 MHz,  $\text{CDCl}_3$ ):  $\delta$  165.8 (d,  $J_{\text{C-F}}$  = 254.7 Hz), 165.7, 140.1 (q,  $J_{\text{C-F}}$  = 6.6 Hz), 132.2 (d,  $J_{\text{C-F}}$  = 9.3 Hz), 126.6, 123.1 (q,  $J_{\text{C-F}}$  = 270.1 Hz), 119.0 (q,  $J_{\text{C-F}}$  = 33.3 Hz), 115.6 (d,  $J_{\text{C-F}}$  = 22.1 Hz), 64.7, 31.1, 28.2, 24.6 ppm.  $^{19}\text{F}$  NMR (376 MHz,  $\text{CDCl}_3$ ):  $\delta$  E isomer: -106.65 (s, 1F), -64.85 (s, 3F), Z isomer: -106.74 (s, 1F), -58.93 (s, 3F) ppm. HRMS  $m/z$  (APCI): calcd. for  $\text{C}_{14}\text{H}_{15}\text{F}_4\text{O}_2$   $[\text{M}+\text{H}]^+$  : 291.1003; found: 291.1007.

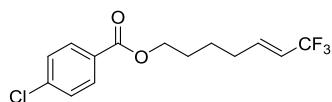

**2i: 7,7,7-trifluorohept-5-en-1-yl 4-chlorobenzoate.** Prepared according to the general procedure. Reaction was run using **1i** (71.4 mg, 0.3 mmol), NIS (135 mg, 0.6 mmol), AgOAc (60.1 mg, 0.36 mmol), Me<sub>3</sub>SiCF<sub>3</sub> (180  $\mu$ L, 1.2 mmol), NaOAc (98.4 mg, 1.2 mmol) and DMSO (3.0 mL). The *E/Z* ratio (92:8) was determined by <sup>19</sup>F NMR of the crude mixture with benzotrifluoride as the internal standard. The product was purified by flash column chromatography on silica gel (hexane/EtOAc) and obtained a colorless oil (0.24 mmol, 73.4 mg, 80 %, *E/Z* = 92:8), *R*<sub>f</sub> = 0.60 (hexane : EtOAc = 5 : 1). E isomer: **<sup>1</sup>H NMR** (400 MHz, CDCl<sub>3</sub>):  $\delta$  7.96 (d, *J* = 8.8 Hz, 2H), 7.40 (d, *J* = 8.8 Hz, 2H), 6.42-6.34 (m, 1H), 5.68-5.59 (m, 1H), 4.32 (t, *J* = 6.4 Hz, 2H), 2.26-2.20 (m, 2H), 1.83-1.74 (m, 2H), 1.63-1.56 (m, 2H) ppm. **<sup>13</sup>C NMR** (101 MHz, CDCl<sub>3</sub>):  $\delta$  165.8, 140.0 (q, *J*<sub>C-F</sub> = 6.6 Hz), 139.5, 131.0, 128.8, 128.8, 123.1 (q, *J*<sub>C-F</sub> = 270.1 Hz), 119.0 (q, *J*<sub>C-F</sub> = 33.4 Hz), 64.8, 31.1, 28.2, 24.6 ppm. **<sup>19</sup>F NMR** (376 MHz, CDCl<sub>3</sub>):  $\delta$  E isomer: -64.85 (s, 3F), Z isomer: -58.92 (s, 3F) ppm. **HRMS** *m/z* (APCI): calcd. for C<sub>14</sub>H<sub>15</sub>ClF<sub>3</sub>O<sub>2</sub> [M+H]<sup>+</sup> : 307.0707; found: 307.0707.

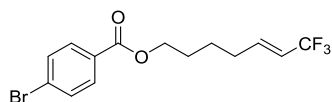

**2j: 7,7,7-trifluorohept-5-en-1-yl 4-bromobenzoate.** Prepared according to the general procedure. Reaction was run using **1j** (84.6 mg, 0.3 mmol), NIS (135 mg, 0.6 mmol), AgOAc (60.1 mg, 0.36 mmol), Me<sub>3</sub>SiCF<sub>3</sub> (180  $\mu$ L, 1.2 mmol), NaOAc (98.4 mg, 1.2 mmol) and DMSO (3.0 mL). The *E/Z* ratio (95:5) was determined by <sup>19</sup>F NMR of the crude mixture with benzotrifluoride as the internal standard. The product was purified by flash column chromatography on silica gel (hexane/EtOAc) and obtained a colorless oil (0.26 mmol, 90.3 mg, 86 %, *E/Z* = 92:8), *R*<sub>f</sub> = 0.60 (hexane : EtOAc = 5 : 1). E isomer: **<sup>1</sup>H NMR** (400 MHz, CDCl<sub>3</sub>):  $\delta$  7.88 (d, *J* = 8.4 Hz, 2H), 7.55 (d, *J* = 8.4 Hz, 2H), 6.41-6.33 (m, 1H), 5.67-5.59 (m, 1H), 4.31 (t, *J* = 6.4 Hz, 2H), 2.23-2.21 (m, 2H), 1.82-1.75 (m, 2H), 1.62-1.55 (m, 2H) ppm. **<sup>13</sup>C NMR** (101 MHz, CDCl<sub>3</sub>):  $\delta$  165.9, 140.0 (q, *J*<sub>C-F</sub> = 6.6 Hz), 131.8, 131.1, 129.3, 128.1, 123.1 (q, *J*<sub>C-F</sub> = 270.2 Hz), 119.0 (q, *J*<sub>C-F</sub> = 33.4 Hz), 64.8, 31.1, 28.2, 24.6 ppm. **<sup>19</sup>F NMR** (376 MHz, CDCl<sub>3</sub>):  $\delta$  E isomer: -64.86 (s, 3F), Z isomer: -58.93 (s, 3F) ppm. **HRMS** *m/z* (APCI): calcd. for C<sub>14</sub>H<sub>15</sub>BrF<sub>3</sub>O<sub>2</sub> [M+H]<sup>+</sup> : 351.0202; found: 351.0209.

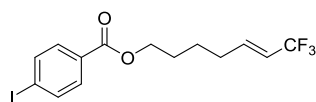

**2k: 7,7,7-trifluorohept-5-en-1-yl 4-iodobenzoate.** Prepared according to the general procedure. Reaction was run using **1k** (99.0 mg, 0.3 mmol), NIS (135 mg, 0.6 mmol), AgOAc (60.1 mg, 0.36 mmol), Me<sub>3</sub>SiCF<sub>3</sub> (180  $\mu$ L, 1.2 mmol), NaOAc (98.4 mg, 1.2 mmol) and DMSO (3.0 mL). The *E/Z* ratio (93:7) was determined by <sup>19</sup>F NMR of the crude mixture with benzotrifluoride as the internal standard. The product was purified by flash column chromatography on silica gel (hexane/EtOAc) and obtained a colorless oil (0.25 mmol, 99.1 mg, 83 %, *E/Z* = 92:8), *R*<sub>f</sub> = 0.60 (hexane : EtOAc = 5 : 1). E isomer: **<sup>1</sup>H NMR** (400 MHz, CDCl<sub>3</sub>):  $\delta$  7.79 (d, *J* = 8.8 Hz, 2H), 7.72 (d, *J* = 8.8 Hz, 2H), 6.41-6.33 (m, 1H), 5.67-5.59 (m, 1H), 4.31 (t, *J* = 6.4 Hz, 2H), 2.24-2.19 (m, 2H), 1.82-1.75 (m, 2H), 1.62-1.55 (m, 2H) ppm. **<sup>13</sup>C NMR** (101 MHz, CDCl<sub>3</sub>):  $\delta$  166.1, 140.0 (q, *J*<sub>C-F</sub> = 6.5 Hz), 137.8, 131.1, 129.8, 123.1 (q, *J*<sub>C-F</sub> = 270.1 Hz), 119.0 (q, *J*<sub>C-F</sub> = 33.3 Hz), 100.8, 64.8, 31.1, 28.2, 24.6 ppm. **<sup>19</sup>F NMR** (376 MHz, CDCl<sub>3</sub>):  $\delta$

E isomer: -64.85 (s, 3F), Z isomer: -58.92 (s, 3F) ppm. **HRMS** *m/z* (APCI): calcd. for C<sub>14</sub>H<sub>15</sub>F<sub>3</sub>IO<sub>2</sub> [M+H]<sup>+</sup>: 399.0063; found: 399.0067.

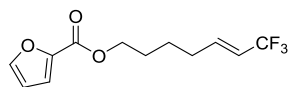

**2l: 7,7,7-trifluorohept-5-en-1-yl furan-2-carboxylate.** Prepared according to the general procedure. Reaction was run using **1l** (58.2 mg, 0.3 mmol), NIS (135 mg, 0.6 mmol), AgOAc (60.1 mg, 0.36 mmol), Me<sub>3</sub>SiCF<sub>3</sub> (180  $\mu$ L, 1.2 mmol), NaOAc (98.4 mg, 1.2 mmol) and DMSO (3.0 mL). The *E/Z* ratio (93:7) was determined by <sup>19</sup>F NMR of the crude mixture with benzotrifluoride as the internal standard. The product was purified by flash column chromatography on silica gel (hexane/EtOAc) and obtained a colorless oil (0.13 mmol, 33.0 mg, 42 %, *E/Z* = 92:8), *R*<sub>f</sub> = 0.70 (hexane : EtOAc = 5 : 1). E isomer: **<sup>1</sup>H NMR** (400 MHz, CDCl<sub>3</sub>):  $\delta$  7.56 (s, 1H), 7.16 (d, *J* = 3.2 Hz, 1H), 7.72 (dd, *J* = 2.0 Hz, 1H), 6.40-6.32 (m, 1H), 5.67-5.58 (m, 1H), 4.30 (t, *J* = 6.4 Hz, 2H), 2.24-2.18 (m, 2H), 1.80-1.73 (m, 2H), 1.61-1.53 (m, 2H) ppm. **<sup>13</sup>C NMR** (101 MHz, CDCl<sub>3</sub>):  $\delta$  158.8, 146.4, 144.8, 140.1 (q, *J*<sub>C-F</sub> = 6.6 Hz), 123.1 (q, *J*<sub>C-F</sub> = 270.1 Hz), 119.0 (q, *J*<sub>C-F</sub> = 33.4 Hz), 118.0, 111.9, 64.5, 31.0, 28.2, 24.5 ppm. **<sup>19</sup>F NMR** (376 MHz, CDCl<sub>3</sub>):  $\delta$  E isomer: -64.86 (s, 3F), Z isomer: -58.94 (s, 3F) ppm. The spectral data are in full accordance with the literature report.<sup>9</sup>

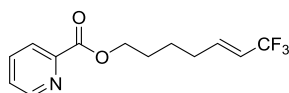

**2m: 7,7,7-trifluorohept-5-en-1-yl picolinate.** Prepared according to the general procedure. Reaction was run using **1m** (61.5 mg, 0.3 mmol), NIS (135 mg, 0.6 mmol), AgOAc (60.1 mg, 0.36 mmol), Me<sub>3</sub>SiCF<sub>3</sub> (180  $\mu$ L, 1.2 mmol), NaOAc (98.4 mg, 1.2 mmol) and DMSO (3.0 mL). The *E/Z* ratio (93:7) was determined by <sup>19</sup>F NMR of the crude mixture with benzotrifluoride as the internal standard. The product was purified by flash column chromatography on silica gel (hexane/EtOAc) and obtained a colorless oil (0.14 mmol, 37.7 mg, 46 %, *E/Z* = 93:7), *R*<sub>f</sub> = 0.30 (hexane : EtOAc = 2 : 1). E isomer: **<sup>1</sup>H NMR** (400 MHz, CDCl<sub>3</sub>):  $\delta$  8.72 (d, *J* = 4.0 Hz, 1H), 8.08 (d, *J* = 7.6 Hz, 1H), 7.81 (t, *J* = 7.8 Hz, 1H), 7.44 (t, *J* = 6.2 Hz, 1H), 6.37-6.29 (m, 1H), 5.64-5.57 (m, 1H), 4.39 (t, *J* = 6.6 Hz, 2H), 2.18-2.15 (m, 2H), 1.85-1.78 (m, 2H), 1.60-1.53 (m, 2H) ppm. **<sup>13</sup>C NMR** (101 MHz, CDCl<sub>3</sub>):  $\delta$  165.3, 149.9, 148.1, 140.0 (q, *J*<sub>C-F</sub> = 6.5 Hz), 137.1, 127.0, 125.2, 123.0 (q, *J*<sub>C-F</sub> = 270.2 Hz), 118.9 (q, *J*<sub>C-F</sub> = 33.4 Hz), 65.5, 31.0, 28.1, 24.4 ppm. **<sup>19</sup>F NMR** (376 MHz, CDCl<sub>3</sub>):  $\delta$  E isomer: -64.84 (s, 3F), Z isomer: -58.92 (s, 3F) ppm. **HRMS** *m/z* (APCI): calcd. for C<sub>13</sub>H<sub>15</sub>F<sub>3</sub>NO<sub>2</sub> [M+H]<sup>+</sup>: 274.1049; found: 274.1047.

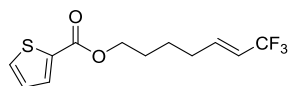

**2n: 7,7,7-trifluorohept-5-en-1-yl thiophene-2-carboxylate.** Prepared according to the general procedure. Reaction was run using **1n** (63.0 mg, 0.3 mmol), NIS (135 mg, 0.6 mmol), AgOAc (60.1 mg, 0.36 mmol), Me<sub>3</sub>SiCF<sub>3</sub> (180  $\mu$ L, 1.2 mmol), NaOAc (98.4 mg, 1.2 mmol) and DMSO (3.0 mL). The *E/Z* ratio (93:7) was determined by <sup>19</sup>F NMR of the crude mixture with benzotrifluoride as the internal standard. The product was purified by flash column chromatography on silica gel (hexane/EtOAc) and obtained a colorless oil (0.25 mmol, 68.4 mg, 82 %, *E/Z* = 91:9), *R*<sub>f</sub> = 0.60 (hexane : EtOAc = 5 : 1). E

<sup>9</sup> Parsons, A. T.; Senecal, T. D.; Buchwald, S. L. *Angew. Chem., Int. Ed.* **2012**, *51*, 2947.

isomer: **<sup>1</sup>H NMR** (400 MHz, CDCl<sub>3</sub>): δ 7.80 (dd, *J* = 3.6 Hz, *J* = 1.2 Hz, 1H), 7.56 (dd, *J* = 4.8 Hz, *J* = 1.2 Hz, 1H), 7.11 (t, *J* = 4.4 Hz, 1H), 6.42-6.35 (m, 1H), 5.69-5.60 (m, 1H), 4.31 (t, *J* = 6.4 Hz, 2H), 2.24-2.21 (m, 2H), 1.82-1.75 (m, 2H), 1.64-1.56 (m, 2H) ppm. **<sup>13</sup>C NMR** (101 MHz, CDCl<sub>3</sub>): δ 162.3, 140.1 (q, *J*<sub>C-F</sub> = 6.6 Hz), 133.9, 133.5, 132.4, 127.8, 123.1 (q, *J*<sub>C-F</sub> = 270.2 Hz), 118.9 (q, *J*<sub>C-F</sub> = 33.3 Hz), 64.7, 31.0, 28.2, 24.5 ppm. **<sup>19</sup>F NMR** (376 MHz, CDCl<sub>3</sub>): δ E isomer: -64.85 (s, 3F), Z isomer: -58.93 (s, 3F) ppm. **HRMS** *m/z* (APCI): calcd. for C<sub>12</sub>H<sub>14</sub>F<sub>3</sub>O<sub>2</sub>S [M+H]<sup>+</sup>: 279.0661; found: 279.0664.

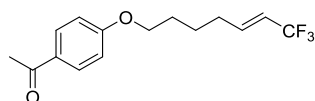

**2o: 1-(4-((7,7,7-trifluorohept-5-en-1-yl)oxy)phenyl)ethan-1-one.** Prepared according to the general procedure. Reaction was run using **1o** (65.4 mg, 0.3 mmol), NIS (135 mg, 0.6 mmol), AgOAc (75.2 mg, 0.45 mmol), Me<sub>3</sub>SiCF<sub>3</sub> (180 μL, 1.2 mmol), NaOAc (98.4 mg, 1.2 mmol) and DMSO (3.0 mL). The *E/Z* ratio (92:8) was determined by <sup>19</sup>F NMR of the crude mixture with benzotrifluoride as the internal standard. The product was purified by flash column chromatography on silica gel (hexane/EtOAc) and obtained a colorless oil (0.20 mmol, 57.5 mg, 67 %, *E/Z* = 93:7), *R*<sub>f</sub> = 0.30 (hexane : EtOAc = 5 : 1). E isomer: **<sup>1</sup>H NMR** (500 MHz, CDCl<sub>3</sub>): δ 7.92 (d, *J* = 8.5 Hz, 2H), 6.91 (d, *J* = 8.5 Hz, 2H), 6.41-6.39 (m, 1H), 5.67-5.63 (m, 1H), 4.03 (t, *J* = 6.0 Hz, 2H), 2.55 (s, 3H), 2.26-2.23 (m, 2H), 1.85-1.81 (m, 2H), 1.68-1.64 (m, 2H) ppm. **<sup>13</sup>C NMR** (126 MHz, CDCl<sub>3</sub>): δ 196.9, 163.0, 140.2 (q, *J*<sub>C-F</sub> = 6.4 Hz), 130.7, 130.4, 123.1 (q, *J*<sub>C-F</sub> = 269.6 Hz), 119.0 (q, *J*<sub>C-F</sub> = 33.3 Hz), 114.2, 67.8, 31.2, 28.6, 26.5, 24.7 ppm. **<sup>19</sup>F NMR** (470 MHz, CDCl<sub>3</sub>): δ E isomer: -64.84 (m, 3F), Z isomer: -58.91 (d, *J* = 8.5, 3F) ppm. **HRMS** *m/z* (APCI): calcd. for C<sub>15</sub>H<sub>18</sub>F<sub>3</sub>O<sub>2</sub> [M+H]<sup>+</sup>: 287.1253; found: 287.1254.

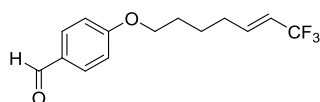

**2p: 4-((7,7,7-trifluorohept-5-en-1-yl)oxy)benzaldehyde.** Prepared according to the general procedure. Reaction was run using **1p** (61.2 mg, 0.3 mmol), NIS (135 mg, 0.6 mmol), AgOAc (75.2 mg, 0.45 mmol), Me<sub>3</sub>SiCF<sub>3</sub> (180 μL, 1.2 mmol), NaOAc (98.4 mg, 1.2 mmol) and DMSO (3.0 mL). The *E/Z* ratio (93:7) was determined by <sup>19</sup>F NMR of the crude mixture with benzotrifluoride as the internal standard. The product was purified by flash column chromatography on silica gel (hexane/EtOAc) and obtained a colorless oil (0.18 mmol, 49.0 mg, 60 %, *E/Z* = 92:8), *R*<sub>f</sub> = 0.30 (hexane : EtOAc = 5 : 1). E isomer: **<sup>1</sup>H NMR** (400 MHz, CDCl<sub>3</sub>): δ 9.86 (s, 1H), 7.81 (d, *J* = 8.8 Hz, 2H), 6.97 (d, *J* = 8.8 Hz, 2H), 6.42-6.35 (m, 1H), 5.68-5.60 (m, 1H), 4.04 (t, *J* = 6.2 Hz, 2H), 2.30-2.23 (m, 2H), 1.87-1.80 (m, 2H), 1.68-1.60 (m, 2H) ppm. **<sup>13</sup>C NMR** (101 MHz, CDCl<sub>3</sub>): δ 190.9, 164.1, 140.1 (q, *J*<sub>C-F</sub> = 6.6 Hz), 132.1, 130.0, 123.1 (q, *J*<sub>C-F</sub> = 270.1 Hz), 118.9 (q, *J*<sub>C-F</sub> = 33.3 Hz), 114.8, 67.9, 31.1, 28.5, 24.6 ppm. **<sup>19</sup>F NMR** (376 MHz, CDCl<sub>3</sub>): δ E isomer: -64.84 (s, 3F), Z isomer: -58.90 (s, 3F) ppm. **HRMS** *m/z* (APCI): calcd. for C<sub>14</sub>H<sub>16</sub>F<sub>3</sub>O<sub>2</sub> [M+H]<sup>+</sup>: 273.1097; found: 273.1097.

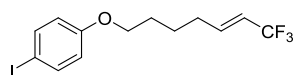

**2q: 1-iodo-4-((7,7,7-trifluorohept-5-en-1-yl)oxy)benzene.** Prepared according to the general procedure. Reaction was run using **1q** (90.6 mg, 0.3 mmol), NIS (135 mg, 0.6 mmol), AgOAc (60.1 mg, 0.36 mmol), Me<sub>3</sub>SiCF<sub>3</sub> (180 μL, 1.2 mmol), NaOAc (98.4 mg, 1.2 mmol) and DMSO (3.0 mL). The *E/Z* ratio (94:6) was determined by <sup>19</sup>F NMR of the crude mixture with benzotrifluoride as the internal standard. The product was purified by flash column chromatography on silica gel (hexane/EtOAc) and obtained a

colorless oil (0.26 mmol, 96.6 mg, 87 %, *E/Z* = 92:8), *R*<sub>f</sub> = 0.60 (hexane : EtOAc = 5 : 1). E isomer: <sup>1</sup>H NMR (400 MHz, CDCl<sub>3</sub>): δ 7.55 (d, *J* = 8.8 Hz, 2H), 6.68 (d, *J* = 8.8 Hz, 2H), 6.45-6.37 (m, 1H), 5.70-5.61 (m, 1H), 3.93 (t, *J* = 6.2 Hz, 2H), 2.26-2.21 (m, 2H), 1.84-1.77 (m, 2H), 1.67-1.58 (m, 2H) ppm. <sup>13</sup>C NMR (101 MHz, CDCl<sub>3</sub>): δ 158.9, 140.3 (q, *J*<sub>C-F</sub> = 6.6 Hz), 138.3, 123.1 (q, *J*<sub>C-F</sub> = 270.1 Hz), 118.9 (q, *J*<sub>C-F</sub> = 33.3 Hz), 117.0, 82.7, 67.6, 31.2, 28.6, 24.6 ppm. <sup>19</sup>F NMR (376 MHz, CDCl<sub>3</sub>): δ E isomer: -64.83 (s, 3F), Z isomer: -58.92 (s, 3F) ppm. HRMS *m/z* (APCI): calcd. for C<sub>13</sub>H<sub>14</sub>F<sub>3</sub>IO [M]<sup>+</sup> : 370.0036; found: 370.0034.

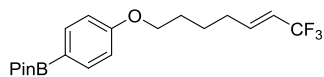

**2r: 4,4,5,5-tetramethyl-2-(4-((7,7,7-trifluorohept-5-en-1-yl)oxy)phenyl)-1,3,2-dioxaborolane.**

Prepared according to the general procedure. Reaction was run using **1r** (90.6 mg, 0.3 mmol), NIS (135 mg, 0.6 mmol), AgOAc (60.1 mg, 0.36 mmol), Me<sub>3</sub>SiCF<sub>3</sub> (180 μL, 1.2 mmol), NaOAc (98.4 mg, 1.2 mmol) and DMSO (3.0 mL). The *E/Z* ratio (96:4) was determined by <sup>19</sup>F NMR of the crude mixture with benzotrifluoride as the internal standard. The product was purified by preparative TLC (hexane/EtOAc) and obtained a colorless oil (0.17 mmol, 61.05 mg, 55 %, *E/Z* = 93:7), *R*<sub>f</sub> = 0.30 (hexane : EtOAc = 10 : 1). E isomer: <sup>1</sup>H NMR (400 MHz, CDCl<sub>3</sub>): δ 7.75 (d, *J* = 8.4 Hz, 2H), 6.88 (d, *J* = 8.4 Hz, 2H), 6.44-6.36 (m, 1H), 5.68-5.60 (m, 1H), 4.00 (t, *J* = 6.2 Hz, 2H), 2.26-2.21 (m, 2H), 1.85-1.78 (m, 2H), 1.68-1.61 (m, 2H), 1.34 (s, 12H) ppm. <sup>13</sup>C NMR (101 MHz, CDCl<sub>3</sub>): δ 161.6, 140.3 (q, *J*<sub>C-F</sub> = 6.5 Hz), 136.7, 123.2 (q, *J*<sub>C-F</sub> = 270.1 Hz), 118.9 (q, *J*<sub>C-F</sub> = 33.4 Hz), 113.9, 83.7, 67.3, 31.2, 28.7, 25.0, 24.7 ppm. <sup>19</sup>F NMR (376 MHz, CDCl<sub>3</sub>): δ E isomer: -64.84 (s, 3F), Z isomer: -58.93 (s, 3F) ppm. HRMS *m/z* (APCI): calcd. for C<sub>19</sub>H<sub>27</sub>BF<sub>3</sub>O<sub>3</sub> [M+H]<sup>+</sup> : 371.2003; found: 371.2003.

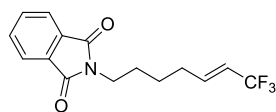

**2s: 2-(7,7,7-trifluorohept-5-en-1-yl)isoindoline-1,3-dione.** Prepared according to the general procedure. Reaction was run using **1q** (68.7 mg, 0.3 mmol), NIS (135 mg, 0.6 mmol), AgOAc (60.1 mg, 0.36 mmol), Me<sub>3</sub>SiCF<sub>3</sub> (180 μL, 1.2 mmol), NaOAc (98.4 mg, 1.2 mmol) and DMSO (3.0 mL). The *E/Z* ratio (93:7) was determined by <sup>19</sup>F NMR of the crude mixture with benzotrifluoride as the internal standard. The product was purified by flash column chromatography on silica gel (hexane/EtOAc) and obtained a colorless oil (0.13 mmol, 38.4 mg, 43 %, *E/Z* = 93:7), *R*<sub>f</sub> = 0.40 (hexane : EtOAc = 5 : 1). E isomer: <sup>1</sup>H NMR (500 MHz, CDCl<sub>3</sub>): δ 7.83-7.82 (m, 2H), 7.71-7.69 (m, 2H), 6.36-6.31 (m, 1H), 5.62-5.58 (m, 1H), 3.69 (t, *J* = 7.0 Hz, 2H), 2.20-2.18 (m, 2H), 1.73-1.67 (m, 2H), 1.51-1.47 (m, 2H) ppm. <sup>13</sup>C NMR (126 MHz, CDCl<sub>3</sub>): δ 168.5, 140.0 (q, *J*<sub>C-F</sub> = 6.6 Hz), 134.1, 132.2, 123.3 123.2 (q, *J*<sub>C-F</sub> = 269.8 Hz), 118.9 (q, *J*<sub>C-F</sub> = 33.3 Hz), 37.6, 31.0, 28.1, 25.3 ppm. <sup>19</sup>F NMR (470 MHz, CDCl<sub>3</sub>): δ E isomer: -64.84 (m, 3F), Z isomer: -58.91 (d, *J* = 8.5, 3F) ppm. The spectral data are in full accordance with the literature report.<sup>7</sup>

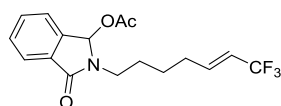

**2t: 3-oxo-2-(7,7,7-trifluorohept-5-en-1-yl)isoindolin-1-yl acetate.** Prepared according to the general procedure. Reaction was run using **1t** (81.9 mg, 0.3 mmol), NIS (135 mg, 0.6 mmol), AgOAc (60.1 mg, 0.36 mmol), Me<sub>3</sub>SiCF<sub>3</sub> (180 μL, 1.2 mmol), NaOAc (98.4 mg, 1.2 mmol) and DMSO (3.0 mL). The *E/Z* ratio (94:6) was determined by <sup>19</sup>F NMR of the crude mixture with benzotrifluoride as the internal

standard. The product was purified by flash column chromatography on silica gel (hexane/EtOAc) and obtained a colorless oil (0.22 mmol, 75.7 mg, 74 %, *E/Z* = 92:8), *R*<sub>f</sub> = 0.30 (hexane : EtOAc = 5 : 1). E isomer: **<sup>1</sup>H NMR** (400 MHz, CDCl<sub>3</sub>): δ 7.79-7.77 (m, 1H), 7.56-7.49 (m, 3H), 6.98 (s, 1H), 6.36-6.29 (m, 1H), 5.64-5.55 (m, 1H), 3.76-3.68 (m, 1H), 3.33-3.26 (m, 1H), 2.20-2.17 (m, 2H), 2.14 (s, 3H), 1.71-1.60 (m, 2H), 1.53-1.44 (m, 2H) ppm. **<sup>13</sup>C NMR** (101 MHz, CDCl<sub>3</sub>): δ 171.2, 168.0, 140.9, 140.1 (q, *J*<sub>C-F</sub> = 6.6 Hz), 132.5, 132.0, 130.4, 123.9, 123.6, 123.1 (q, *J*<sub>C-F</sub> = 270.1 Hz), 118.9 (q, *J*<sub>C-F</sub> = 33.3 Hz), 81.2, 40.0, 31.0, 27.8, 25.2, 21.1 ppm. **<sup>19</sup>F NMR** (376 MHz, CDCl<sub>3</sub>): δ E isomer: -64.82 (s, 3F), Z isomer: -58.87 (s, 3F) ppm. **HRMS** *m/z* (APCI): calcd. for C<sub>17</sub>H<sub>19</sub>F<sub>3</sub>NO<sub>3</sub> [M+H]<sup>+</sup>: 342.1312; found: 342.1317.

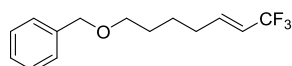

**2u: ((7,7,7-trifluorohept-5-en-1-yl)oxy)methylbenzene.** Prepared according to the general procedure. Reaction was run using **1u** (57.0 mg, 0.3 mmol), NIS (135 mg, 0.6 mmol), AgOAc (60.1 mg, 0.36 mmol), Me<sub>3</sub>SiCF<sub>3</sub> (180 μL, 1.2 mmol), NaOAc (98.4 mg, 1.2 mmol) and DMSO (3.0 mL). The *E/Z* ratio (94:6) was determined by <sup>19</sup>F NMR of the crude mixture with benzotrifluoride as the internal standard. The product was purified by flash column chromatography on silica gel (hexane/EtOAc) and obtained a colorless oil (0.19 mmol, 49.5 mg, 64 %, *E/Z* = 92:8), *R*<sub>f</sub> = 0.60 (hexane : EtOAc = 8 : 1). E isomer: **<sup>1</sup>H NMR** (400 MHz, CDCl<sub>3</sub>): δ 7.39-7.26 (m, 5H), 6.43-6.35 (m, 1H), 5.67-5.58 (m, 1H), 4.52 (s, 2H), 3.50 (t, *J* = 6.2 Hz, 2H), 2.22-2.15 (m, 2H), 1.70-1.63 (m, 2H), 1.60-1.54 (m, 2H) ppm. **<sup>13</sup>C NMR** (101 MHz, CDCl<sub>3</sub>): δ 140.6 (q, *J*<sub>C-F</sub> = 6.6 Hz), 138.6, 128.5, 127.8, 127.7, 123.2 (q, *J*<sub>C-F</sub> = 270.0 Hz), 118.7 (q, *J*<sub>C-F</sub> = 33.2 Hz), 73.1, 70.0, 31.3, 29.3, 24.8 ppm. **<sup>19</sup>F NMR** (376 MHz, CDCl<sub>3</sub>): δ E isomer: -64.83 (s, 3F), Z isomer: -58.94 (s, 3F) ppm. The spectral data are in full accordance with the literature report.<sup>10</sup>

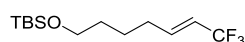

**2v: tert-butyldimethyl((7,7,7-trifluorohept-5-en-1-yl)oxy)silane.** Prepared according to the general procedure. Reaction was run using **1v** (64.2 mg, 0.3 mmol), NIS (135 mg, 0.6 mmol), AgOAc (60.1 mg, 0.36 mmol), Me<sub>3</sub>SiCF<sub>3</sub> (180 μL, 1.2 mmol), NaOAc (98.4 mg, 1.2 mmol) and DMSO (3.0 mL). The *E/Z* ratio (92:8) was determined by <sup>19</sup>F NMR of the crude mixture with benzotrifluoride as the internal standard. The product was purified by flash column chromatography on silica gel (hexane/EtOAc) and obtained a colorless oil (0.19 mmol, 52.3 mg, 62 %, *E/Z* = 93:7), *R*<sub>f</sub> = 0.30 (hexane). E isomer: **<sup>1</sup>H NMR** (400 MHz, CDCl<sub>3</sub>): δ 6.41-6.34 (m, 1H), 5.65-5.57 (m, 1H), 3.62 (t, *J* = 6.0 Hz, 2H), 2.19-2.17 (m, 2H), 1.54-1.49 (m, 2H), 0.90 (s, 9H), 0.05 (s, 6H) ppm. **<sup>13</sup>C NMR** (101 MHz, CDCl<sub>3</sub>): δ 140.7 (q, *J*<sub>C-F</sub> = 6.6 Hz), 123.3 (q, *J*<sub>C-F</sub> = 270.0 Hz), 118.6 (q, *J*<sub>C-F</sub> = 33.3 Hz), 62.9, 32.2, 31.4, 26.1, 24.5, 18.5, -5.2 ppm. **<sup>19</sup>F NMR** (376 MHz, CDCl<sub>3</sub>): δ E isomer: -64.85 (s, 3F), Z isomer: -58.98 (s, 3F) ppm. The spectral data are in full accordance with the literature report.<sup>7</sup>

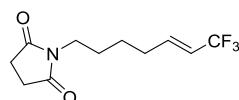

**2w: 1-(7,7,7-trifluorohept-5-en-1-yl)pyrrolidine-2,5-dione.** Prepared according to the general procedure. Reaction was run using **1w** (76.2 mg, 0.3 mmol), NIS (135 mg, 0.6 mmol), AgOAc (60.1 mg, 0.36 mmol), Me<sub>3</sub>SiCF<sub>3</sub> (180 μL, 1.2 mmol), NaOAc (98.4 mg, 1.2 mmol) and DMSO (3.0 mL). The *E/Z* ratio (92:8) was determined by <sup>19</sup>F NMR of the crude mixture with benzotrifluoride as the internal standard. The product was purified by flash column chromatography on silica gel (hexane/EtOAc) and



obtained a colorless oil (0.18 mmol, 44.8 mg, 60 %,  $E/Z = 93:7$ ),  $R_f = 0.30$  (hexane : EtOAc = 2 : 1). E isomer:  $^1\text{H NMR}$  (400 MHz,  $\text{CDCl}_3$ ):  $\delta$  6.35-6.27 (m, 1H), 5.63-5.54 (m, 1H), 3.48 (t,  $J = 7.2$  Hz, 2H), 2.68 (s, 4H), 2.17-2.14 (m, 2H), 1.60-1.53 (m, 2H), 1.45-1.36 (m, 2H) ppm.  $^{13}\text{C NMR}$  (101 MHz,  $\text{CDCl}_3$ ):  $\delta$  177.4, 140.0 (q,  $J_{\text{C-F}} = 6.6$  Hz), 123.0 (q,  $J_{\text{C-F}} = 270.2$  Hz), 118.9 (q,  $J_{\text{C-F}} = 33.4$  Hz), 38.4, 30.9, 28.2, 27.2, 25.2 ppm.  $^{19}\text{F NMR}$  (376 MHz,  $\text{CDCl}_3$ ):  $\delta$  E isomer: -64.84 (s, 3F), Z isomer: -58.90 (s, 3F) ppm. **HRMS**  $m/z$  (APCI): calcd. for  $\text{C}_{11}\text{H}_{15}\text{F}_3\text{NO}_2$   $[\text{M}+\text{H}]^+$  : 250.1049; found: 250.1046.

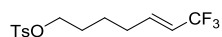

**2w': (E)-7,7,7-trifluorohept-5-en-1-yl 4-methylbenzenesulfonate.** Prepared according to the general procedure. Reaction was run using **1w** (76.2 mg, 0.3 mmol), NIS (135 mg, 0.6 mmol), AgOAc (60.1 mg, 0.36 mmol),  $\text{Me}_3\text{SiCF}_3$  (180  $\mu\text{L}$ , 1.2 mmol), NaOAc (98.4 mg, 1.2 mmol) and DMSO (3.0 mL). The  $E/Z$  ratio (91:9) was determined by  $^{19}\text{F NMR}$  of the crude mixture with benzotrifluoride as the internal standard. The product was purified by flash column chromatography on silica gel (hexane/EtOAc) and obtained a colorless oil (0.045 mmol, 14.5 mg, 15 %,  $E/Z = 90:10$ ),  $R_f = 0.40$  (hexane : EtOAc = 8 : 1). E isomer:  $^1\text{H NMR}$  (400 MHz,  $\text{CDCl}_3$ ):  $\delta$  7.78 (d,  $J = 8.0$  Hz, 2H), 7.35 (d,  $J = 8.0$  Hz, 2H), 6.32-6.24 (m, 1H), 5.60-5.53 (m, 1H), 4.03 (t,  $J = 6.2$  Hz, 2H), 2.44 (s, 3H), 2.13-2.08 (m, 2H), 1.69-1.62 (m, 2H), 1.51-1.43 (m, 2H) ppm.  $^{13}\text{C NMR}$  (101 MHz,  $\text{CDCl}_3$ ):  $\delta$  145.0, 139.7 (q,  $J_{\text{C-F}} = 6.6$  Hz), 133.1, 130.0, 128.0, 123.0 (q,  $J_{\text{C-F}} = 270.1$  Hz), 119.1 (q,  $J_{\text{C-F}} = 33.4$  Hz), 70.1, 30.7, 28.3, 24.0, 21.7 ppm.  $^{19}\text{F NMR}$  (376 MHz,  $\text{CDCl}_3$ ):  $\delta$  E isomer: -64.90 (s, 3F), Z isomer: -58.95 (s, 3F) ppm. The spectral data are in full accordance with the literature report.<sup>11</sup>

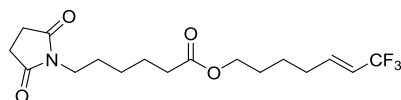

**2x: 7,7,7-trifluorohept-5-en-1-yl 6-(2,5-dioxopyrrolidin-1-yl)hexanoate.** Prepared according to the general procedure. Reaction was run using **1x** (82.8 mg, 0.3 mmol), NIS (135 mg, 0.6 mmol), AgOAc (60.1 mg, 0.36 mmol),  $\text{Me}_3\text{SiCF}_3$  (180  $\mu\text{L}$ , 1.2 mmol), NaOAc (98.4 mg, 1.2 mmol) and DMSO (3.0 mL). The  $E/Z$  ratio (91:9) was determined by  $^{19}\text{F NMR}$  of the crude mixture with benzotrifluoride as the internal standard. The product was purified by flash column chromatography on silica gel (hexane/EtOAc) and obtained a colorless oil (0.23 mmol, 85.0 mg, 78 %,  $E/Z = 92:8$ ),  $R_f = 0.30$  (hexane : EtOAc = 2 : 1). E isomer:  $^1\text{H NMR}$  (400 MHz,  $\text{CDCl}_3$ ):  $\delta$  6.33-6.26 (m, 1H), 5.59-5.53 (m, 1H), 3.99 (t,  $J = 6.6$  Hz, 2H), 3.41 (t,  $J = 7.4$  Hz, 2H), 2.62 (s, 4H), 2.22 (t,  $J = 7.4$  Hz, 2H), 2.15-2.12 (m, 2H), 1.60-1.42 (m, 8H), 1.28-1.22 (m, 2H) ppm.  $^{13}\text{C NMR}$  (101 MHz,  $\text{CDCl}_3$ ):  $\delta$  177.3, 173.4, 140.1 (q,  $J_{\text{C-F}} = 6.5$  Hz), 123.0 (q,  $J_{\text{C-F}} = 270.1$  Hz), 118.7 (q,  $J_{\text{C-F}} = 33.4$  Hz), 63.8, 38.5, 33.9, 30.9, 28.1, 28.1, 28.0, 27.3, 26.3, 24.4 ppm.  $^{19}\text{F NMR}$  (376 MHz,  $\text{CDCl}_3$ ):  $\delta$  E isomer: -64.85 (s, 3F), Z isomer: -58.94 (s, 3F) ppm. **HRMS**  $m/z$  (APCI): calcd. for  $\text{C}_{17}\text{H}_{24}\text{F}_3\text{NO}_4$   $[\text{M}+\text{H}]^+$  : 364.1730; found: 364.1735.

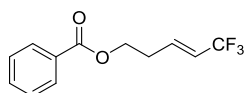

**2y: 5,5,5-trifluoropent-3-en-1-yl benzoate.** Prepared according to the general procedure. Reaction was run using **1y** (52.8 mg, 0.3 mmol), NIS (135 mg, 0.6 mmol), AgOAc (60.1 mg, 0.36 mmol),  $\text{Me}_3\text{SiCF}_3$  (180  $\mu\text{L}$ , 1.2 mmol), NaOAc (98.4 mg, 1.2 mmol) and DMSO (3.0 mL). The  $E/Z$  ratio (90:10) was determined by  $^{19}\text{F NMR}$  of the crude mixture with benzotrifluoride as the internal standard. The product

11 Xu, J.; Fu, Y.; Luo, D.-F.; Jiang, Y.-Y.; Xiao, B.; Liu, Z.-J.; Gong, T.-J.; Liu, L. *J. Am. Chem. Soc.* **2011**, *133*, 15300.

was purified by flash column chromatography on silica gel (hexane/EtOAc) and obtained a colorless oil (0.19 mmol, 46.8 mg, 64 %, *E/Z* = 90:10),  $R_f$  = 0.40 (hexane : EtOAc = 8 : 1). E isomer: **<sup>1</sup>H NMR** (400 MHz, CDCl<sub>3</sub>): δ 8.02 (d, *J* = 8.4 Hz, 2H), 7.57 (t, *J* = 7.4 Hz, 1H), 7.45 (t, *J* = 7.8 Hz, 2H), 6.50-6.42 (m, 1H), 5.83-5.74 (m, 1H), 4.43 (t, *J* = 6.4 Hz, 2H), 2.67-2.61 (m, 2H) ppm. **<sup>13</sup>C NMR** (101 MHz, CDCl<sub>3</sub>): δ 166.5, 136.3 (q,  $J_{C-F}$  = 6.7 Hz), 133.3, 129.7, 128.6, 128.5, 125.5 (q,  $J_{C-F}$  = 270.3 Hz), 121.1 (q,  $J_{C-F}$  = 33.7 Hz), 62.7, 31.1 ppm. **<sup>19</sup>F NMR** (376 MHz, CDCl<sub>3</sub>): δ E isomer: -65.23 (s, 3F), Z isomer: -59.18 (s, 3F) ppm. **HRMS** *m/z* (APCI): calcd. for C<sub>12</sub>H<sub>12</sub>F<sub>3</sub>O<sub>2</sub> [M+H]<sup>+</sup> : 245.0784; found: 245.0781.

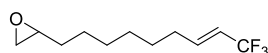

**2z: 2-(9,9,9-trifluoronon-7-en-1-yl)oxirane.** Prepared according to the general procedure. Reaction was run using **1z** (46.2 mg, 0.3 mmol), NIS (135 mg, 0.6 mmol), AgOAc (60.1 mg, 0.36 mmol), Me<sub>3</sub>SiCF<sub>3</sub> (180 μL, 1.2 mol), NaOAc (98.4 mg, 1.2 mmol) and DMSO (3.0 mL). The *E/Z* ratio (93:7) was determined by <sup>19</sup>F NMR of the crude mixture with benzotrifluoride as the internal standard. The product was purified by flash column chromatography on silica gel (hexane/EtOAc) and obtained a colorless oil (0.22 mmol, 48.0 mg, 72 %, *E/Z* = 93:7),  $R_f$  = 0.70 (hexane : EtOAc = 5 : 1). E isomer: **<sup>1</sup>H NMR** (400 MHz, CDCl<sub>3</sub>): δ 6.40-6.31 (m, 1H), 5.63-5.54 (m, 1H), 2.90-2.86 (m, 1H), 2.72 (t, *J* = 4.6 Hz, 1H), 2.45-2.43 (m, 1H), 2.14-2.10 (m, 2H), 1.53-1.39 (m, 6H), 1.36-1.31 (m, 4H) ppm. **<sup>13</sup>C NMR** (101 MHz, CDCl<sub>3</sub>): δ 140.8 (q,  $J_{C-F}$  = 6.6 Hz), 123.2 (q,  $J_{C-F}$  = 270.1 Hz), 118.4 (q,  $J_{C-F}$  = 33.2 Hz), 52.4, 47.1, 32.5, 31.5, 29.2, 29.0, 27.9, 26.0 ppm. **<sup>19</sup>F NMR** (376 MHz, CDCl<sub>3</sub>): δ E isomer: -64.88 (s, 3F), Z isomer: -58.99 (s, 3F) ppm. The spectral data are in full accordance with the literature report.<sup>12</sup>

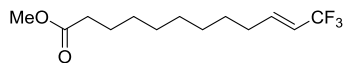

**2aa: methyl-12,12,12-trifluorododec-10-enoate.** Prepared according to the general procedure. Reaction was run using **1aa** (59.4 mg, 0.3 mmol), NIS (135 mg, 0.6 mmol), AgOAc (60.1 mg, 0.36 mmol), Me<sub>3</sub>SiCF<sub>3</sub> (180 μL, 1.2 mol), NaOAc (98.4 mg, 1.2 mmol) and DMSO (3.0 mL). The *E/Z* ratio (94:6) was determined by <sup>19</sup>F NMR of the crude mixture with benzotrifluoride as the internal standard. The product was purified by flash column chromatography on silica gel (hexane/EtOAc) and obtained a colorless oil (0.23 mmol, 60.6 mg, 76 %, *E/Z* = 92:8),  $R_f$  = 0.70 (hexane : EtOAc = 5 : 1). E isomer: **<sup>1</sup>H NMR** (400 MHz, CDCl<sub>3</sub>): δ 6.40-6.32 (m, 1H), 5.63-5.56 (m, 1H), 3.66 (s, 3H), 2.30 (t, *J* = 7.6 Hz, 2H), 2.15-2.12 (m, 2H), 1.63-1.59 (m, 2H), 1.44-1.40 (m, 2H), 1.33-1.25 (m, 8H) ppm. **<sup>13</sup>C NMR** (101 MHz, CDCl<sub>3</sub>): δ 174.4, 140.9 (q,  $J_{C-F}$  = 6.6 Hz), 123.3 (q,  $J_{C-F}$  = 270.0 Hz), 118.4 (q,  $J_{C-F}$  = 33.2 Hz), 51.6, 34.2, 31.5, 29.3, 29.2, 29.2, 29.1, 28.0, 25.0 ppm. **<sup>19</sup>F NMR** (376 MHz, CDCl<sub>3</sub>): δ E isomer: -64.82 (s, 3F), Z isomer: -58.96 (s, 3F) ppm. **HRMS** *m/z* (APCI): calcd. for C<sub>13</sub>H<sub>22</sub>F<sub>3</sub>O<sub>2</sub> [M+H]<sup>+</sup> : 267.1566; found: 267.1570.

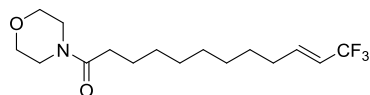

**2ab: 12,12,12-trifluoro-1-morpholinododec-10-en-1-one.** Prepared according to the general procedure. Reaction was run using **1ab** (75.9 mg, 0.3 mmol), NIS (135 mg, 0.6 mmol), AgOAc (60.1 mg, 0.36 mmol), Me<sub>3</sub>SiCF<sub>3</sub> (180 μL, 1.2 mol), NaOAc (98.4 mg, 1.2 mmol) and DMSO (3.0 mL). The *E/Z* ratio (92:8) was determined by <sup>19</sup>F NMR of the crude mixture with benzotrifluoride as the internal standard.

The product was purified by flash column chromatography on silica gel (hexane/EtOAc) and obtained a colorless oil (0.20 mmol, 64.5 mg, 67 %, *E/Z* = 92:8),  $R_f$  = 0.30 (hexane : EtOAc = 1 : 1). E isomer: **<sup>1</sup>H NMR** (500 MHz, CDCl<sub>3</sub>): δ 6.36-6.31 (m, 1H), 5.59-5.54 (m, 1H), 3.66-3.62 (m, 4H), 3.59-3.57 (m, 2H), 3.45-3.40 (m, 2H), 2.27 (t, *J* = 7.5 Hz, 2H), 2.14-2.10 (m, 2H), 1.63-1.59 (m, 2H), 1.44-1.38 (m, 2H), 1.33-1.21 (m, 8H) ppm. **<sup>13</sup>C NMR** (126 MHz, CDCl<sub>3</sub>): δ 171.9, 140.9 (q,  $J_{C-F}$  = 6.6 Hz), 123.2 (q,  $J_{C-F}$  = 269.5 Hz), 118.3 (q,  $J_{C-F}$  = 33.1 Hz), 67.0, 66.7, 46.1, 41.9, 33.1, 31.5, 29.4, 29.3, 29.2, 29.0, 28.0, 25.2 ppm. **<sup>19</sup>F NMR** (470 MHz, CDCl<sub>3</sub>): δ E isomer: -64.80 (m, 3F), Z isomer: -58.95 (d, *J* = 8.5, 3F) ppm. **HRMS** *m/z* (APCI): calcd. for C<sub>16</sub>H<sub>27</sub>F<sub>3</sub>NO<sub>2</sub> [M+H]<sup>+</sup> : 322.1988; found: 322.1983.

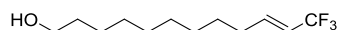

**2ac: 12,12,12-trifluorododec-10-en-1-ol.** Prepared according to the general procedure. Reaction was run using **1ac** (51.0 mg, 0.3 mmol), NIS (135 mg, 0.6 mmol), AgOAc (60.1 mg, 0.36 mmol), Me<sub>3</sub>SiCF<sub>3</sub> (180 μL, 1.2 mol), NaOAc (98.4 mg, 1.2 mmol) and DMSO (3.0 mL). The *E/Z* ratio (92:8) was determined by <sup>19</sup>F NMR of the crude mixture with benzotrifluoride as the internal standard. The product was purified by flash column chromatography on silica gel (hexane/EtOAc) and obtained a colorless oil (0.24 mmol, 57.0 mg, 80 %, *E/Z* = 92:8),  $R_f$  = 0.40 (hexane : EtOAc = 2 : 1). E isomer: **<sup>1</sup>H NMR** (400 MHz, CDCl<sub>3</sub>): δ 6.39-6.31 (m, 1H), 5.62-5.53 (m, 1H), 3.61 (t, *J* = 6.6 Hz, 2H), 2.14-2.10 (m, 2H), 1.79 (s, 1H), 1.58-1.51 (m, 2H), 1.43-1.37 (m, 2H), 1.34-1.24 (m, 10H) ppm. **<sup>13</sup>C NMR** (101 MHz, CDCl<sub>3</sub>): δ 140.9 (q,  $J_{C-F}$  = 6.6 Hz), 123.2 (q,  $J_{C-F}$  = 269.9 Hz), 118.4 (q,  $J_{C-F}$  = 33.2 Hz), 63.1, 32.8, 31.5, 29.6, 29.5, 29.4, 29.1, 28.0, 25.8 ppm. **<sup>19</sup>F NMR** (376 MHz, CDCl<sub>3</sub>): δ E isomer: -64.81 (s, 3F), Z isomer: -58.95 (s, 3F) ppm. The spectral data are in full accordance with the literature report.<sup>13</sup>

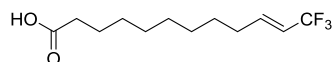

**2ad: 12,12,12-trifluorododec-10-enoic acid.** Prepared according to the general procedure. Reaction was run using **1ad** (55.2 mg, 0.3 mmol), NIS (135 mg, 0.6 mmol), AgOAc (60.1 mg, 0.36 mmol), Me<sub>3</sub>SiCF<sub>3</sub> (180 μL, 1.2 mol), NaOAc (98.4 mg, 1.2 mmol) and DMSO (3.0 mL). The *E/Z* ratio (92:8) was determined by <sup>19</sup>F NMR of the crude mixture with benzotrifluoride as the internal standard. The product was purified by flash column chromatography on silica gel (hexane/EtOAc) and obtained a colorless oil (0.21 mmol, 53.7 mg, 71 %, *E/Z* = 92:8),  $R_f$  = 0.40 (hexane : EtOAc = 2 : 1). E isomer: **<sup>1</sup>H NMR** (500 MHz, CDCl<sub>3</sub>): δ 6.40-6.34 (m, 1H), 5.63-5.56 (m, 1H), 2.35 (t, *J* = 7.5 Hz, 2H), 2.14-2.12 (m, 2H), 1.66-1.60 (m, 2H), 1.45-1.40 (m, 2H), 1.39-1.26 (m, 8H) ppm. **<sup>13</sup>C NMR** (126 MHz, CDCl<sub>3</sub>): δ 180.5, 140.9 (q,  $J_{C-F}$  = 6.6 Hz), 123.3 (q,  $J_{C-F}$  = 269.4 Hz), 118.5 (q,  $J_{C-F}$  = 33.3 Hz), 34.2, 31.6, 29.3, 29.2, 29.1, 29.0, 28.0, 24.7 ppm. **<sup>19</sup>F NMR** (470 MHz, CDCl<sub>3</sub>): δ E isomer: -64.81 (m, 3F), Z isomer: -58.90 (d, *J* = 8.5, 3F) ppm. **HRMS** *m/z* (APCI): calcd. for C<sub>12</sub>H<sub>20</sub>F<sub>3</sub>O<sub>2</sub> [M+H]<sup>+</sup> : 253.1410; found: 253.1409.

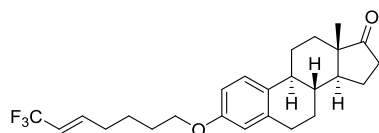

**2ae: (8R,9S,13S,14S)-13-methyl-3-((7,7,7-trifluorohept-5-en-1-yl)oxy)6,7,8,9,11,12,13,14,15,16-decahydro-17H-cyclopenta[a]phenanthren-17-one.** Prepared according to the general procedure. Reaction was run using **1ae** (105.6 mg, 0.3 mmol), NIS (135 mg, 0.6 mmol), AgOAc (75.2 mg, 0.45 mmol), Me<sub>3</sub>SiCF<sub>3</sub> (180 μL, 1.2 mol), NaOAc (98.4 mg, 1.2 mmol) and DMSO (3.0 mL). The *E/Z* ratio

<sup>13</sup> Wu, X.; Chu, L.; Qing, F.-L. *Angew. Chem., Int. Ed.* **2013**, *52*, 2198.

(94:6) was determined by  $^{19}\text{F}$  NMR of the crude mixture with benzotrifluoride as the internal standard. The product was purified by flash column chromatography on silica gel (hexane/EtOAc) and obtained a colorless oil (0.14 mmol, 58.0 mg, 46 %,  $E/Z = 92:8$ , 51.0 mg **1ae** was recovered, 94 % brsm yield),  $R_f = 0.30$  (hexane : EtOAc = 8 : 1). E isomer:  $^1\text{H}$  NMR (500 MHz,  $\text{CDCl}_3$ ):  $\delta$  7.20 (d,  $J = 8.5$  Hz, 1H), 6.71 (d,  $J = 8.0$  Hz, 1H), 6.65 (s, 1H), 6.42-6.39 (m, 1H), 5.67-5.62 (m, 1H), 3.96 (t,  $J = 6.0$  Hz, 2H), 2.92-2.89 (m, 2H), 2.51 (dd,  $J = 9.3$  Hz, 2H), 2.41-2.38 (m, 1H), 2.30-2.21 (m, 2H), 2.18-2.11 (m, 1H), 2.09-2.00 (m, 2H), 1.96 (d,  $J = 10.5$  Hz, 1H), 1.83-1.78 (m, 2H), 1.68-1.56 (m, 4H), 1.54-1.40 (m, 4H), 0.91 (s, 3H) ppm.  $^{13}\text{C}$  NMR (101 MHz,  $\text{CDCl}_3$ ):  $\delta$  221.0, 157.0, 140.4 (q,  $J_{\text{C-F}} = 6.6$  Hz), 137.8, 132.1, 126.4, 123.1 (q,  $J_{\text{C-F}} = 270.3$  Hz), 118.8 (q,  $J_{\text{C-F}} = 33.2$  Hz), 114.6, 112.1, 67.4, 50.5, 48.1, 44.1, 38.4, 35.9, 31.7, 31.2, 29.7, 28.7, 26.6, 26.0, 24.7, 21.7, 13.9 ppm.  $^{19}\text{F}$  NMR (470 MHz,  $\text{CDCl}_3$ ):  $\delta$  E isomer: -64.84 (m, 3F), Z isomer: -58.95 (d,  $J = 8.5$ , 3F) ppm. HRMS  $m/z$  (APCI): calcd. for  $\text{C}_{25}\text{H}_{32}\text{F}_3\text{O}_2$   $[\text{M}+\text{H}]^+$ : 421.2349; found: 421.2347.

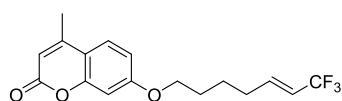

**2af: 4-methyl-7-((7,7,7-trifluorohept-5-en-1-yl)oxy)-2H-chromen-2-one.** Prepared according to the general procedure. Reaction was run using **1af** (77.4 mg, 0.3 mmol), NIS (135 mg, 0.6 mmol), AgOAc (75.2 mg, 0.45 mmol),  $\text{Me}_3\text{SiCF}_3$  (180  $\mu\text{L}$ , 1.2 mol), NaOAc (98.4 mg, 1.2 mmol) and DMSO (3.0 mL). The  $E/Z$  ratio (93:7) was determined by  $^{19}\text{F}$  NMR of the crude mixture with benzotrifluoride as the internal standard. The product was purified by flash column chromatography on silica gel (hexane/EtOAc) and obtained a colorless oil (0.21 mmol, 68.5 mg, 70 %,  $E/Z = 94:6$ ),  $R_f = 0.30$  (hexane : EtOAc = 5 : 1). E isomer:  $^1\text{H}$  NMR (500 MHz,  $\text{CDCl}_3$ ):  $\delta$  7.45 (d,  $J = 8.5$  Hz, 1H), 6.81 (d,  $J = 8.5$  Hz, 1H), 6.74 (s, 1H), 6.39-6.36 (m, 1H), 6.08 (s, 1H), 5.67-5.61 (m, 1H), 3.99 (t,  $J = 6.3$  Hz, 2H), 2.35 (s, 3H), 2.25-2.20 (m, 2H), 1.85-1.79 (m, 2H), 1.66-1.60 (m, 2H) ppm.  $^{13}\text{C}$  NMR (126 MHz,  $\text{CDCl}_3$ ):  $\delta$  162.0, 161.3, 155.3, 152.7, 140.1 (q,  $J_{\text{C-F}} = 6.6$  Hz), 125.6, 123.1 (q,  $J_{\text{C-F}} = 269.5$  Hz), 118.9 (q,  $J_{\text{C-F}} = 33.3$  Hz), 113.6, 112.6, 111.9, 101.3, 68.1, 31.1, 28.4, 24.5, 18.7 (q,  $J_{\text{C-F}} = 2.4$  Hz) ppm.  $^{19}\text{F}$  NMR (376 MHz,  $\text{CDCl}_3$ ):  $\delta$  E isomer: -64.84 (s, 3F), Z isomer: -58.91 (s, 3F) ppm. HRMS  $m/z$  (APCI): calcd. for  $\text{C}_{17}\text{H}_{18}\text{F}_3\text{O}_3$   $[\text{M}+\text{H}]^+$ : 327.1201; found: 327.1203.

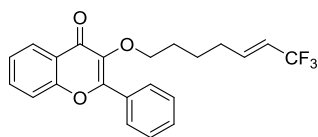

**2ag: 4-methyl-7-((7,7,7-trifluorohept-5-en-1-yl)oxy)-2H-chromen-2-one.** Prepared according to the general procedure. Reaction was run using **1ag** (96.0 mg, 0.3 mmol), NIS (135 mg, 0.6 mmol), AgOAc (75.2 mg, 0.45 mmol),  $\text{Me}_3\text{SiCF}_3$  (180  $\mu\text{L}$ , 1.2 mol), NaOAc (98.4 mg, 1.2 mmol) and DMSO (3.0 mL). The  $E/Z$  ratio (93:7) was determined by  $^{19}\text{F}$  NMR of the crude mixture with benzotrifluoride as the internal standard. The product was purified by flash column chromatography on silica gel (hexane/EtOAc) and obtained a colorless oil (0.28 mmol, 107.1 mg, 92%,  $E/Z = 92:8$ ),  $R_f = 0.60$  (hexane : EtOAc = 5 : 1). E isomer:  $^1\text{H}$  NMR (400 MHz,  $\text{CDCl}_3$ ):  $\delta$  8.23 (d,  $J = 8.0$  Hz, 1H), 8.06-8.03 (m, 2H), 7.63 (t,  $J = 7.8$  Hz, 1H), 7.50-7.47 (m, 4H), 7.35 (t,  $J = 7.4$  Hz, 1H), 6.33-6.25 (m, 1H), 5.58-5.49 (m, 1H), 4.04 (t,  $J = 6.2$  Hz, 2H), 2.13-2.07 (m, 2H), 1.72-1.65 (m, 2H), 1.54-1.47 (m, 2H) ppm.  $^{13}\text{C}$  NMR (126 MHz,  $\text{CDCl}_3$ ):  $\delta$  175.2, 156.0, 155.3, 140.5, 140.4 (q,  $J_{\text{C-F}} = 6.4$  Hz), 133.5, 131.0, 130.7, 128.7, 128.4, 125.8, 124.7, 124.2, 123.1 (q,  $J_{\text{C-F}} = 269.5$  Hz), 118.5 (q,  $J_{\text{C-F}} = 33.3$  Hz), 118.0, 72.1, 30.9, 29.3, 24.3 ppm.  $^{19}\text{F}$  NMR

(376 MHz, CDCl<sub>3</sub>):  $\delta$  E isomer: -64.82 (s, 3F), Z isomer: -58.94 (s, 3F) ppm. **HRMS**  $m/z$  (APCI): calcd. for C<sub>22</sub>H<sub>20</sub>F<sub>3</sub>O<sub>3</sub> [M+H]<sup>+</sup> : 389.1357; found: 389.1359.

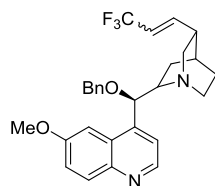

**1ah:** (1*S*,4*S*,5*S*)-2-((*R*)-(benzyloxy)(6-methoxyquinolin-4-yl)methyl)-5-(3,3,3-trifluoroprop-1-en-1-yl)quinuclidine. Prepared according to the general procedure. Reaction was run using **1ah** (124.2 mg, 0.3 mmol), NIS (135 mg, 0.6 mmol), AgOAc (75.2 mg, 0.45 mmol), Me<sub>3</sub>SiCF<sub>3</sub> (180  $\mu$ L, 1.2 mol), NaOAc (98.4 mg, 1.2 mmol) and DMSO (3.0 mL). The *E/Z* ratio (63:37) was determined by <sup>19</sup>F NMR of the crude mixture with benzonitrile as the internal standard. The product was purified by preparative TLC and obtained a yellow oil (0.16 mmol, 78.1 mg, 54%, *E/Z* isomer can be separated by preparative TLC to afford pure compound respectively), *R*<sub>f</sub> = 0.50 (CH<sub>2</sub>Cl<sub>2</sub> : MeOH = 20 : 1).

E isomer: **<sup>1</sup>H NMR** (400 MHz, CDCl<sub>3</sub>):  $\delta$  8.78 (d, *J* = 4.4 Hz, 1H), 8.06 (d, *J* = 9.2 Hz, 1H), 7.60 (s, 1H), 7.52 (d, *J* = 4.0 Hz, 1H), 7.43 (d, *J* = 2.4 Hz, 1H), 7.10 (d, *J* = 2.4 Hz, 1H), 7.39-7.32 (m, 4H), 6.23-6.17 (m, 1H), 5.67-5.59 (m, 1H), 4.58-4.49 (m, 2H), 4.07 (s, 3H), 3.82 (s, 1H), 3.41-3.32 (m, 2H), 3.08-2.82 (m, 2H), 2.74-2.57 (m, 2H), 2.24-1.90 (m, 3H), 1.82-1.67 (m, 1H), 1.57 (t, *J* = 10.8 Hz, 1H) ppm. **<sup>13</sup>C NMR** (101 MHz, CDCl<sub>3</sub>):  $\delta$  158.9, 147.3, 144.9, 142.3 (m), 140.2 (m), 137.2, 132.0, 128.8, 128.3, 127.9, 127.2, 123.0, 122.5 (q, *J*<sub>C-F</sub> = 6.4 Hz), 120.5 (m), 118.7, 101.1, 71.6, 60.1, 57.1, 55.1, 43.3, 36.9, 29.8, 27.2, 25.7, 20.5 ppm. **<sup>19</sup>F NMR** (376 MHz, CDCl<sub>3</sub>):  $\delta$  -64.53 (s, 3F) ppm. **HRMS**  $m/z$  (APCI): calcd. for C<sub>28</sub>H<sub>30</sub>F<sub>3</sub>N<sub>2</sub>O<sub>2</sub> [M+H]<sup>+</sup> : 483.2254; found: 483.2252.

Z isomer: **<sup>1</sup>H NMR** (400 MHz, CDCl<sub>3</sub>):  $\delta$  8.76 (d, *J* = 4.0 Hz, 1H), 8.05 (d, *J* = 9.2 Hz, 1H), 7.52 (d, *J* = 3.6 Hz, 2H), 7.41-7.28 (m, 6H), 5.87 (t, *J* = 10.8 Hz, 1H), 5.58-5.53 (m, 1H), 4.55-4.48 (m, 2H), 4.01 (s, 3H), 3.71-3.58 (m, 2H), 3.34-3.25 (m, 2H), 3.02-2.80 (m, 2H), 2.74-2.62 (m, 1H), 2.10-1.81 (m, 3H), 1.66-1.59 (m, 2H) ppm. **<sup>13</sup>C NMR** (101 MHz, CDCl<sub>3</sub>):  $\delta$  158.6, 147.5, 144.8, 143.6 (m), 142.9 (m), 137.4, 132.0, 128.7, 128.1, 127.8, 127.3, 122.8 (q, *J*<sub>C-F</sub> = 270.7 Hz), 122.6, 119.8 (m), 118.6, 101.1, 71.5, 60.3, 56.8, 56.7, 43.2, 34.0, 29.8, 27.2, 26.2, 20.8 ppm. **<sup>19</sup>F NMR** (376 MHz, CDCl<sub>3</sub>):  $\delta$  -58.73 (s, 3F) ppm. **HRMS**  $m/z$  (APCI): calcd. for C<sub>28</sub>H<sub>30</sub>F<sub>3</sub>N<sub>2</sub>O<sub>2</sub> [M+H]<sup>+</sup> : 483.2254; found: 483.2253.

**Spectrum:**

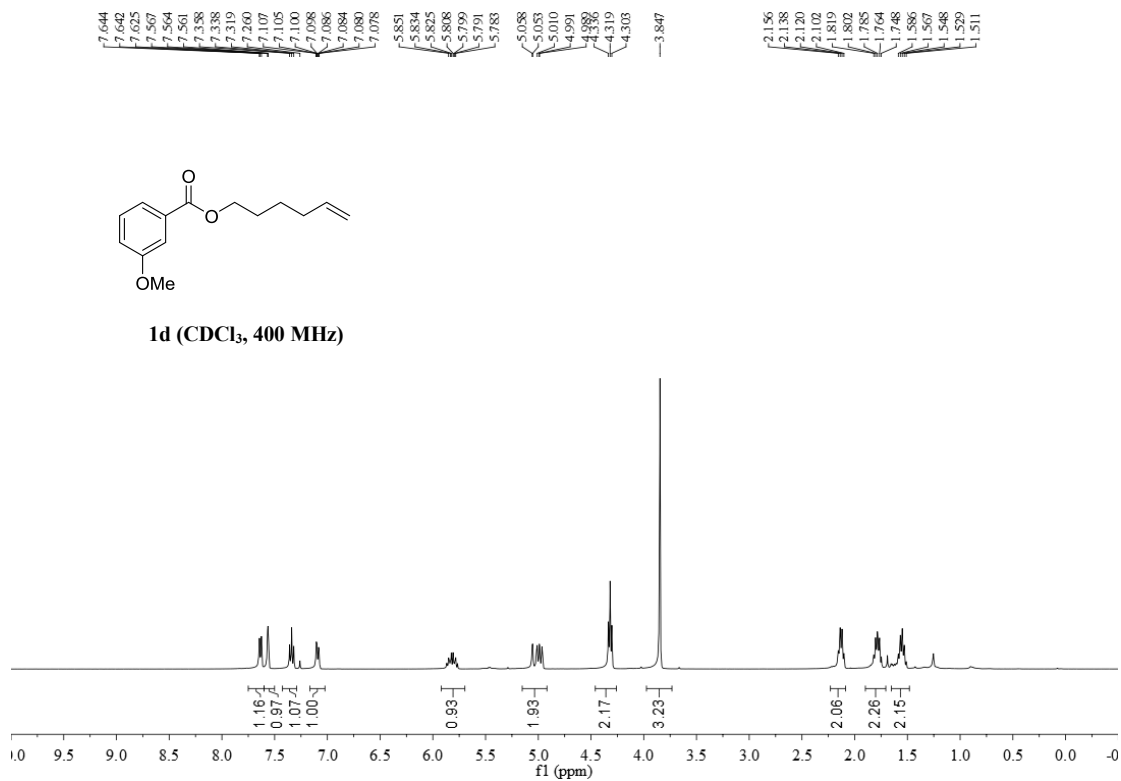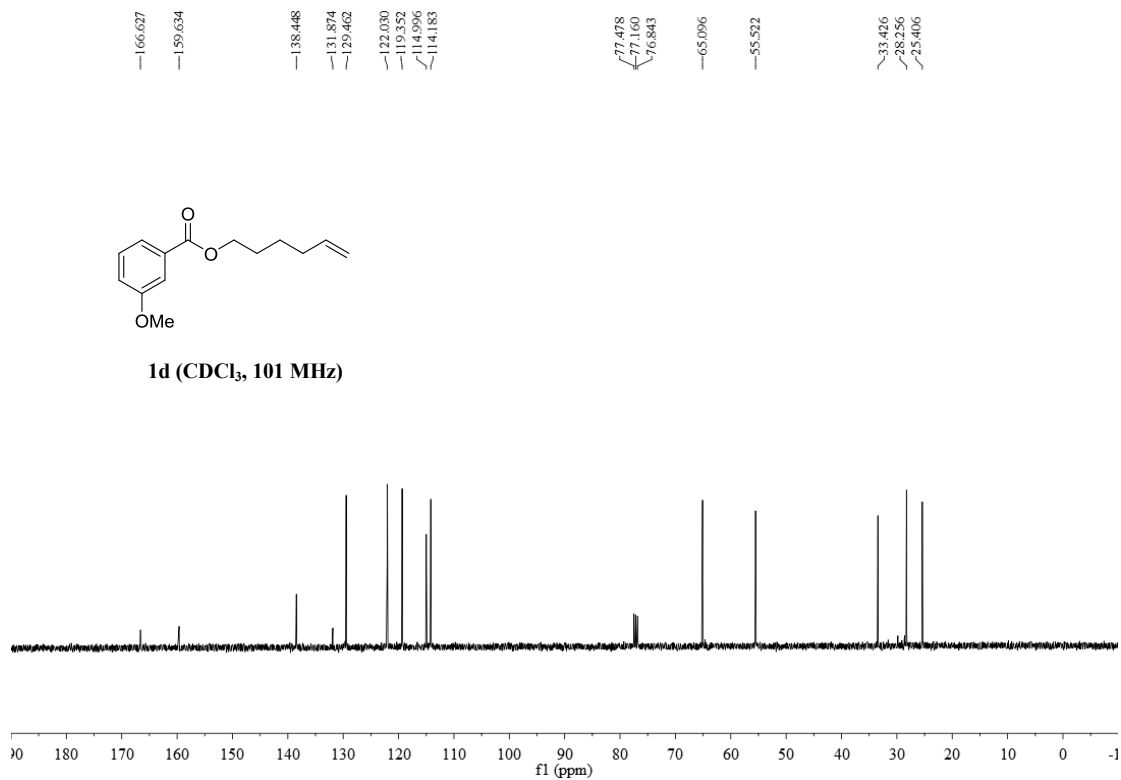

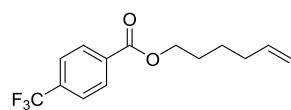

**1f (CDCl<sub>3</sub>, 400 MHz)**

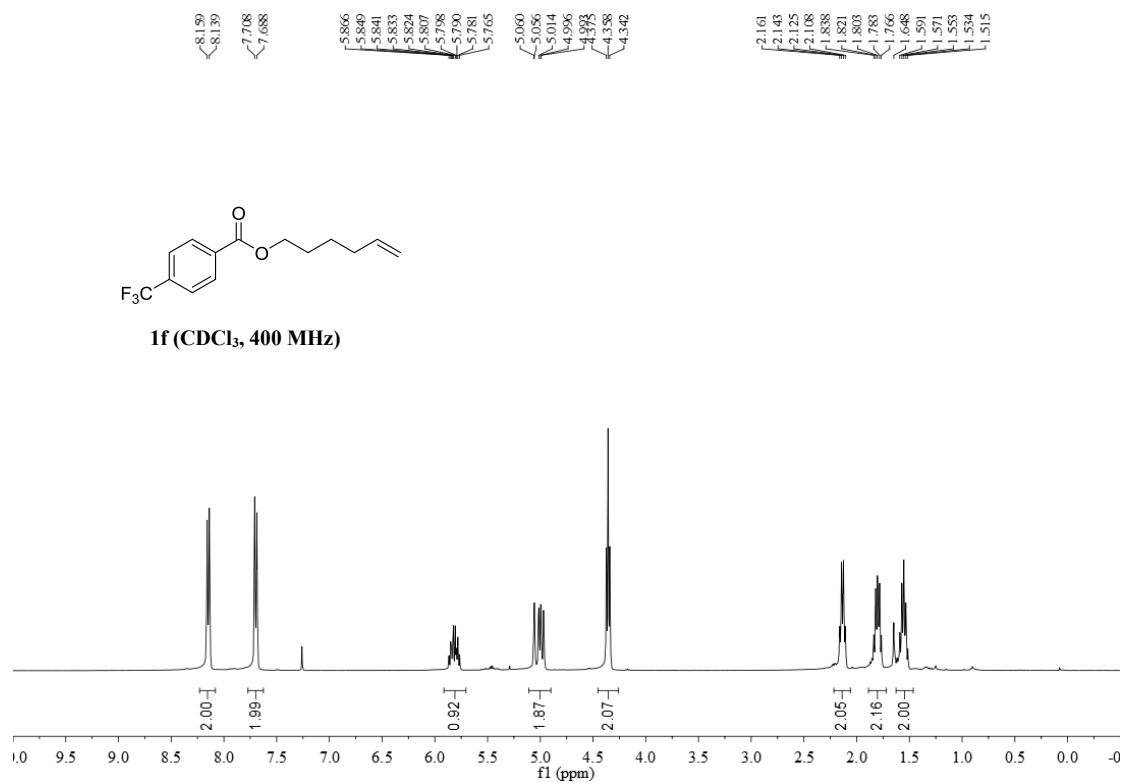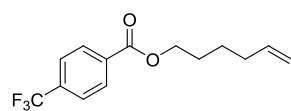

**1f (CDCl<sub>3</sub>, 376 MHz)**

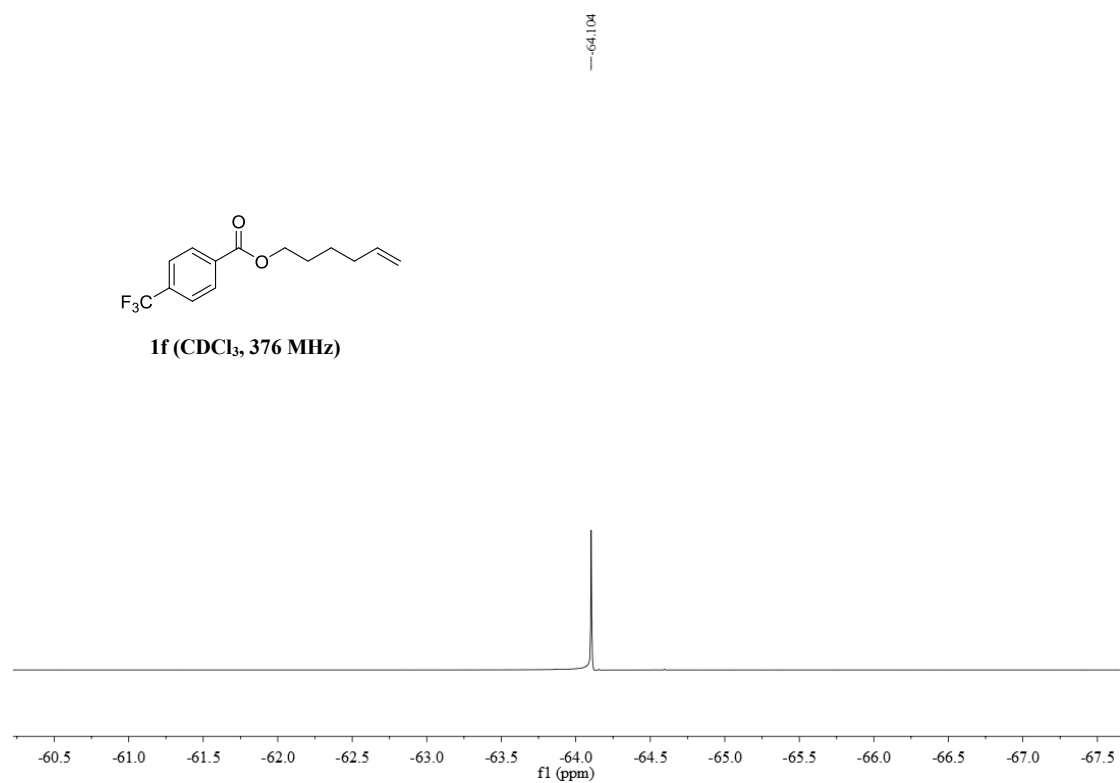

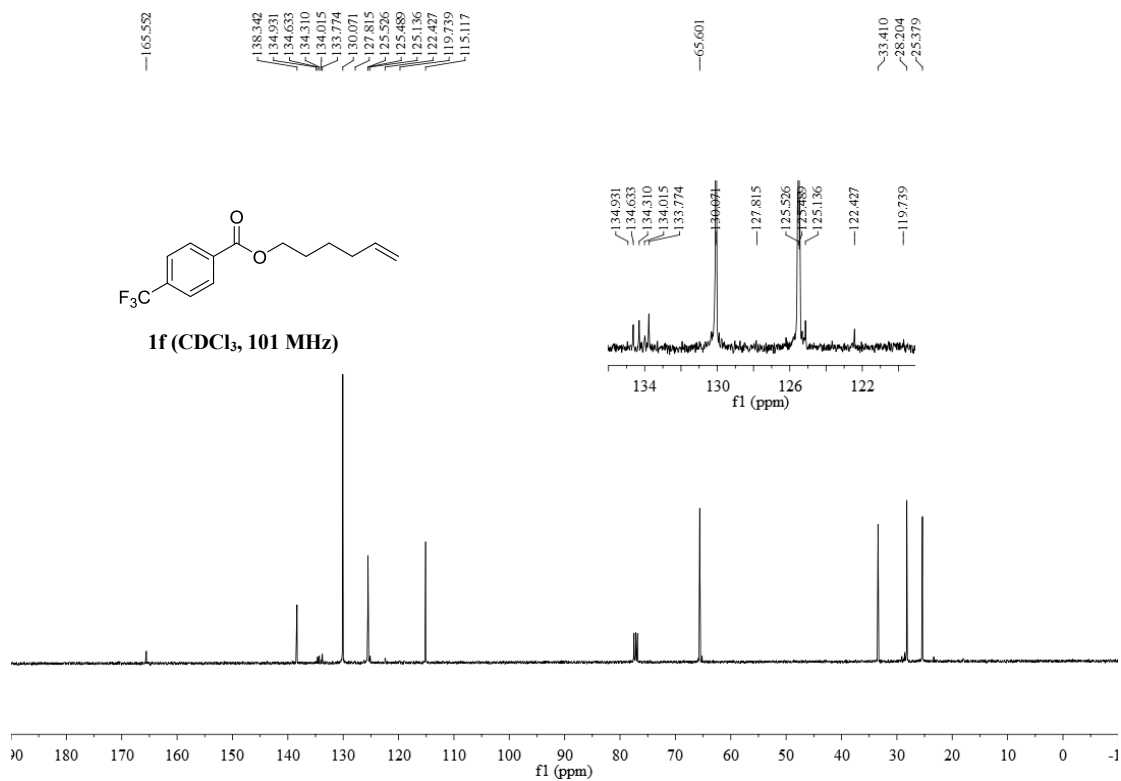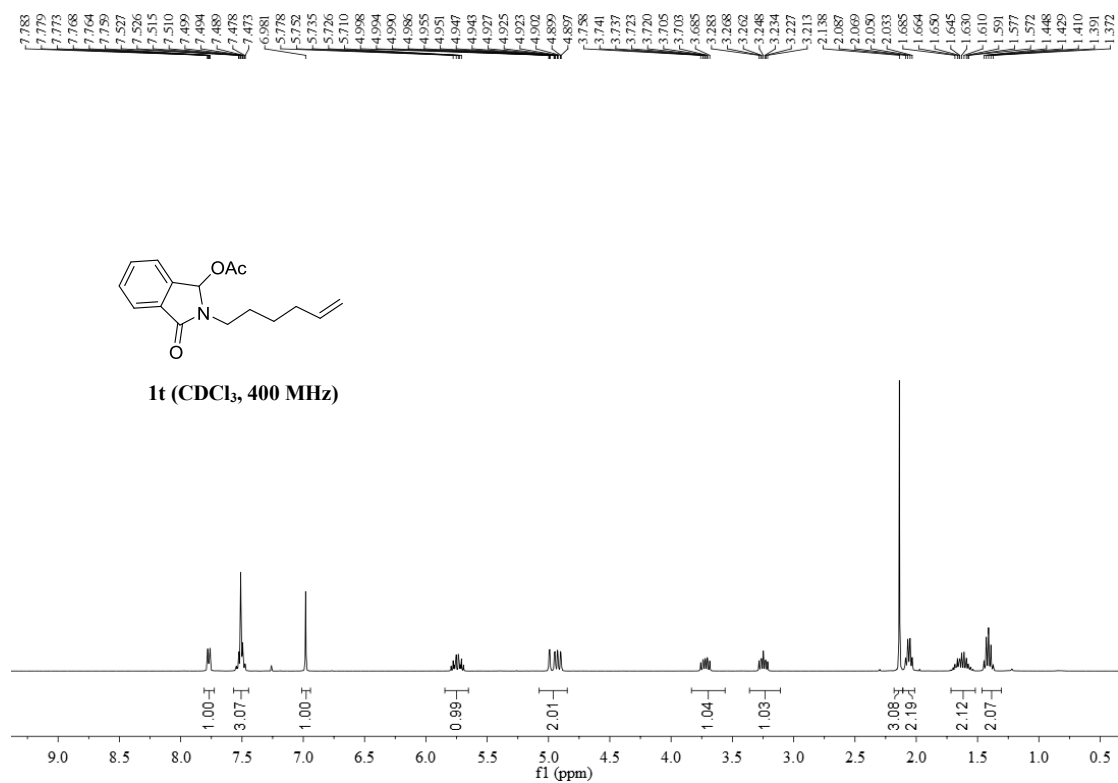



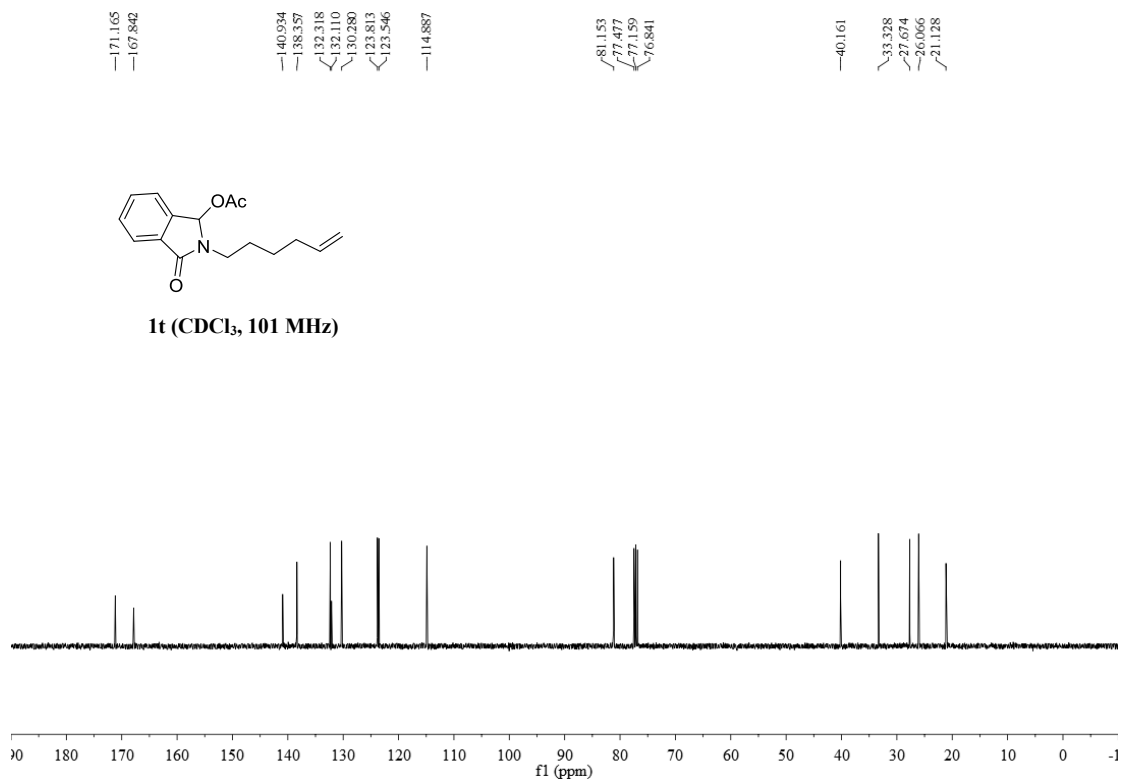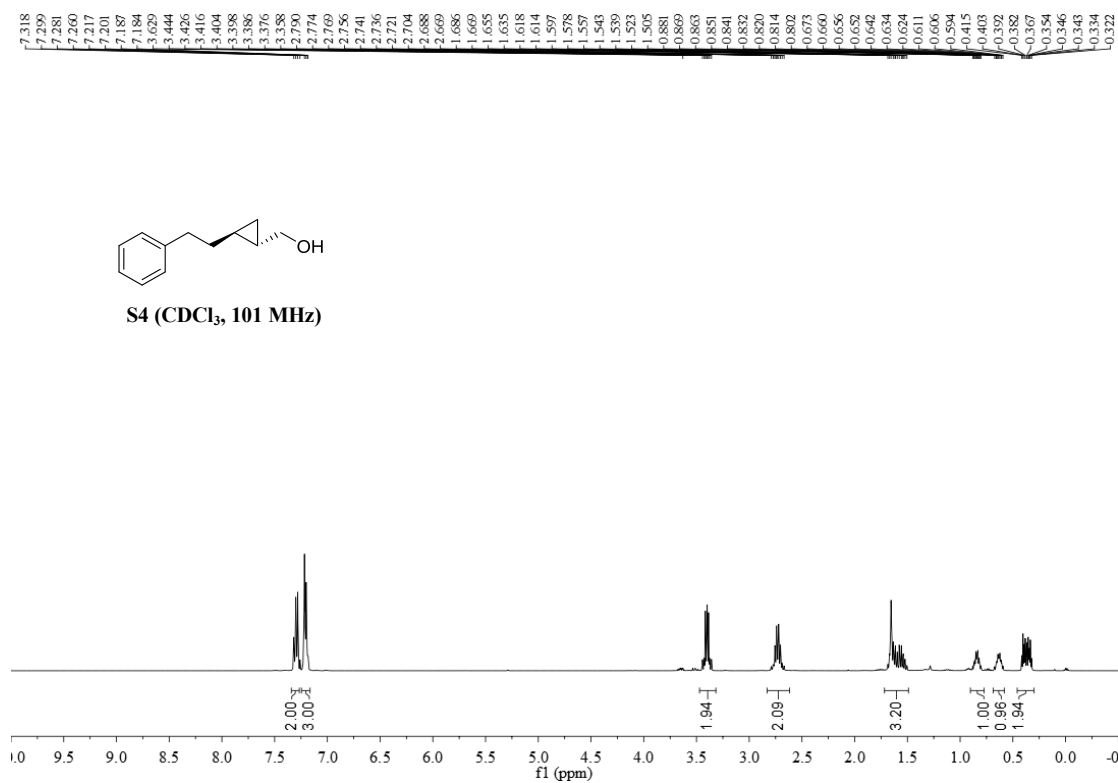

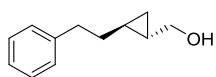

S4 (CDCl<sub>3</sub>, 101 MHz)

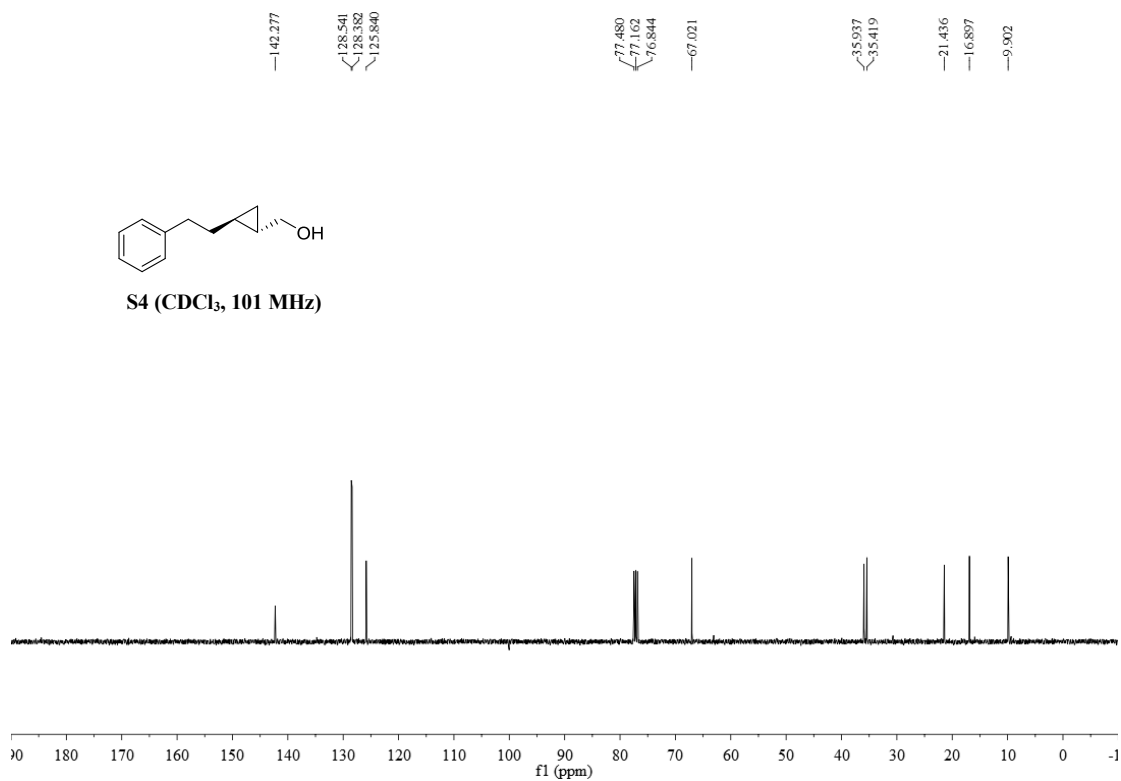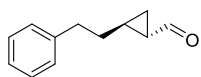

S5 (CDCl<sub>3</sub>, 400 MHz)

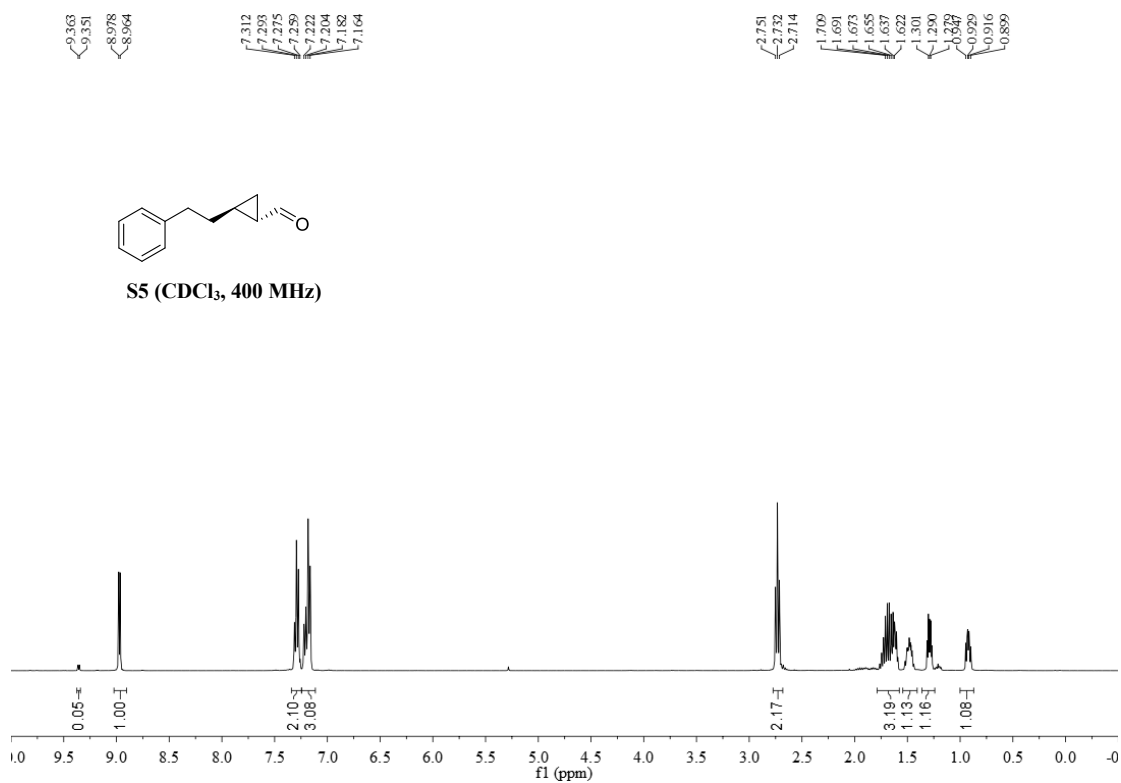

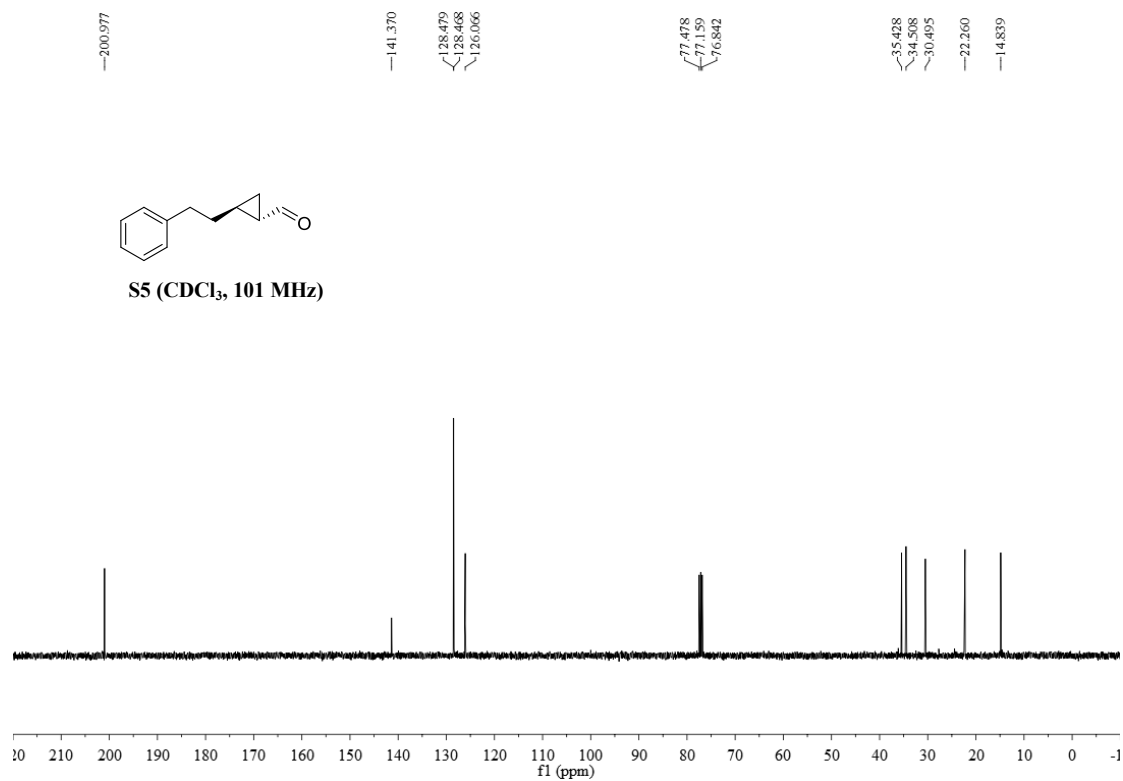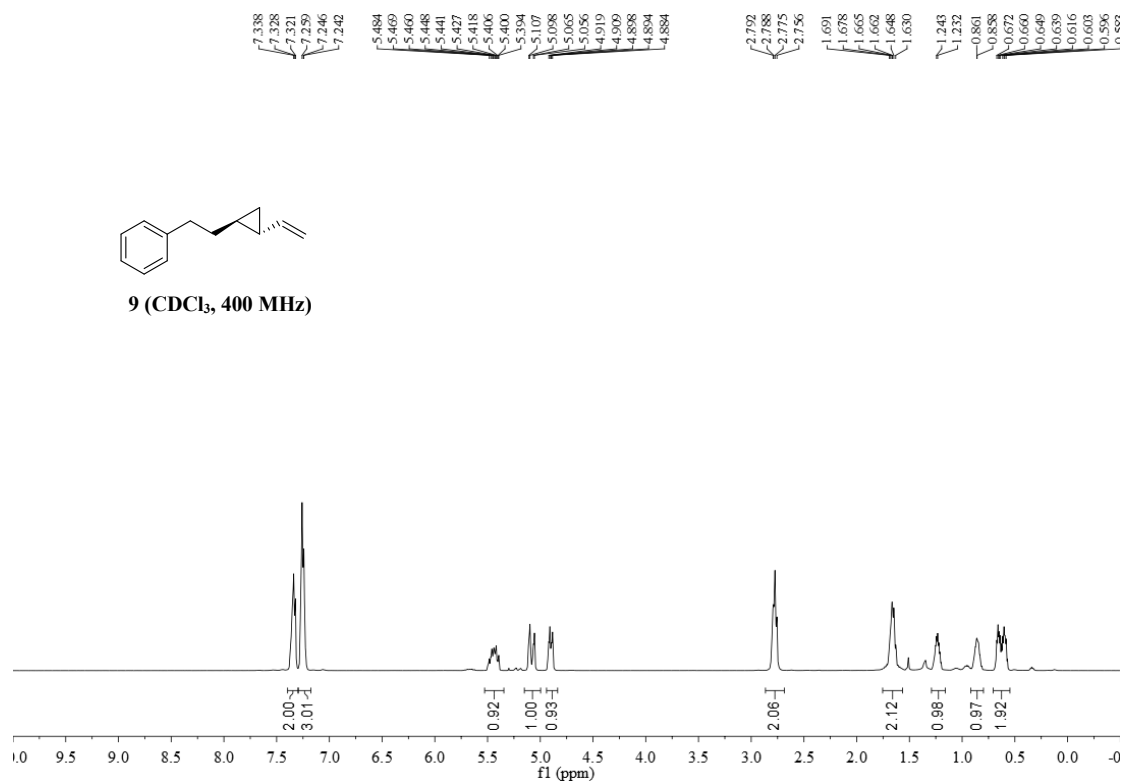

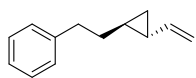

**9** (CDCl<sub>3</sub>, 101 MHz)

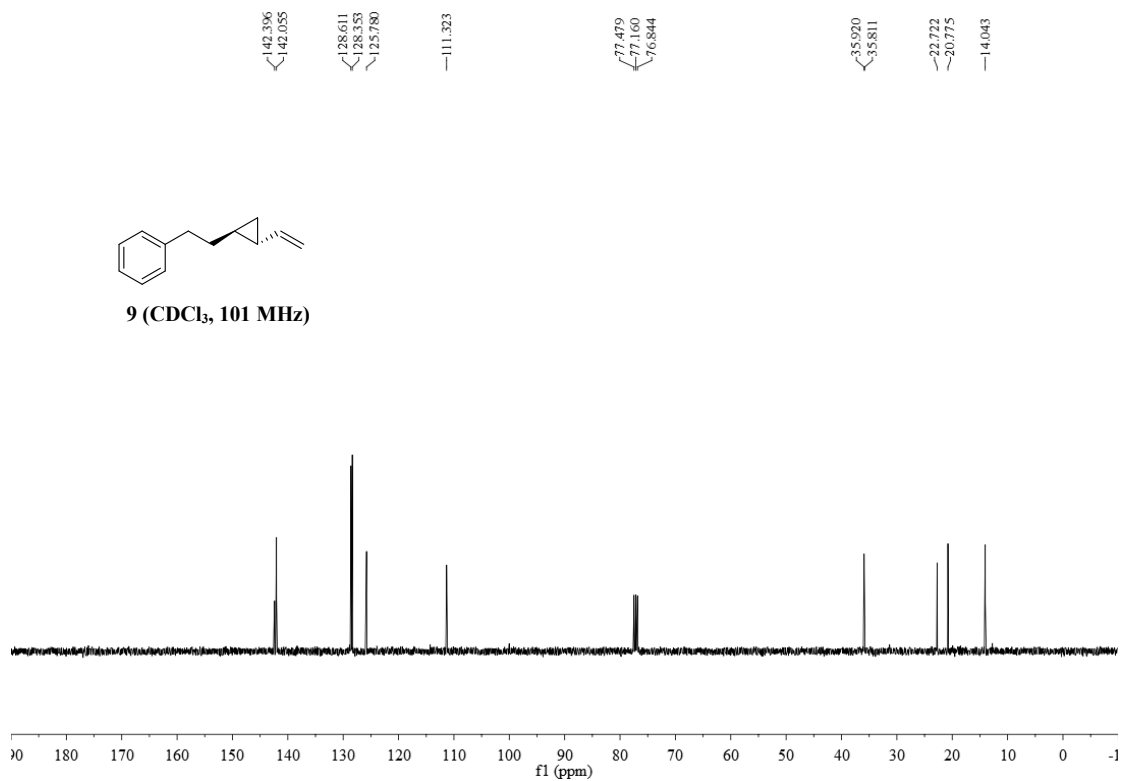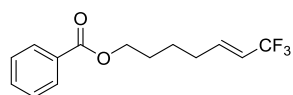

**2a** (CDCl<sub>3</sub>, 400 MHz)

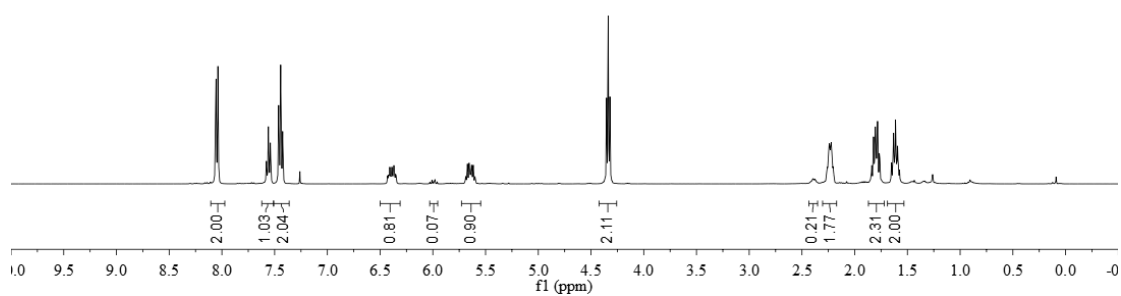

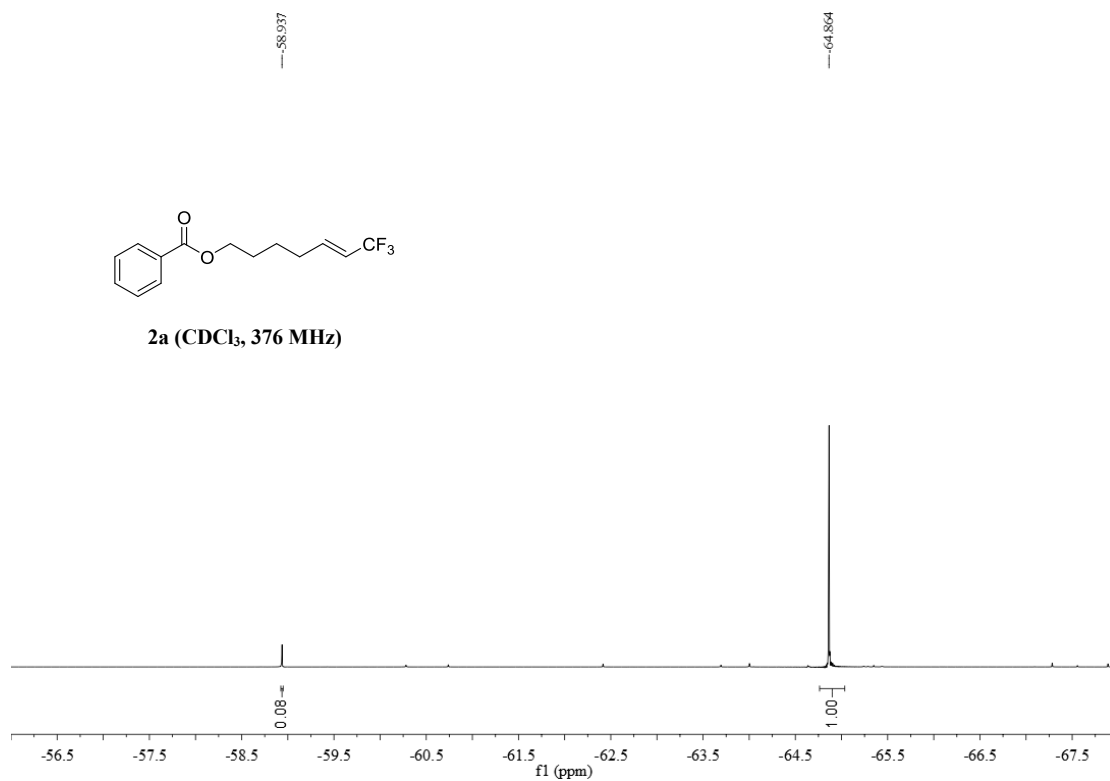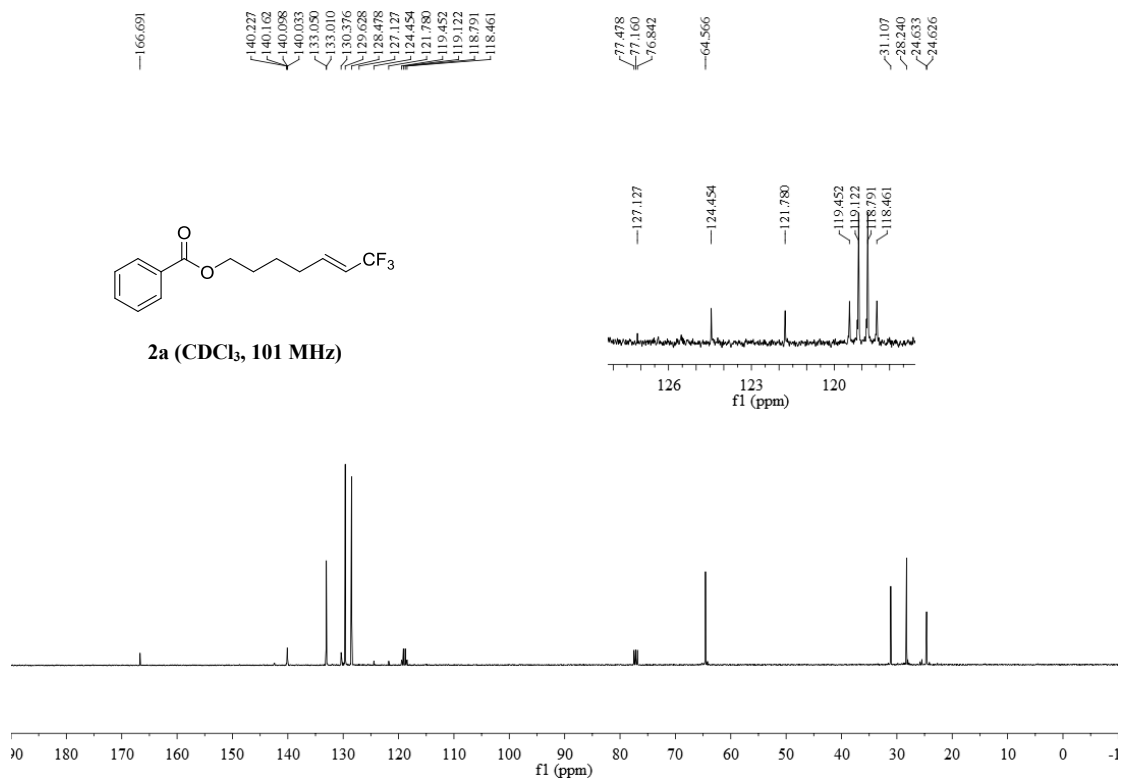

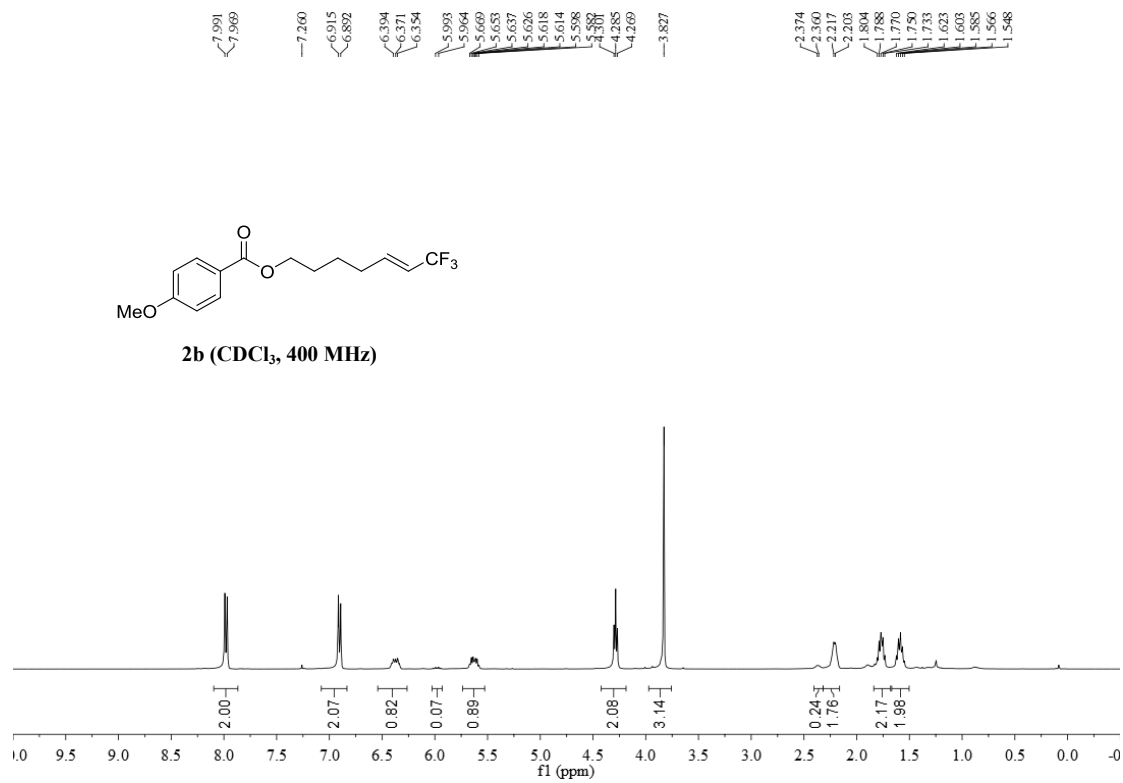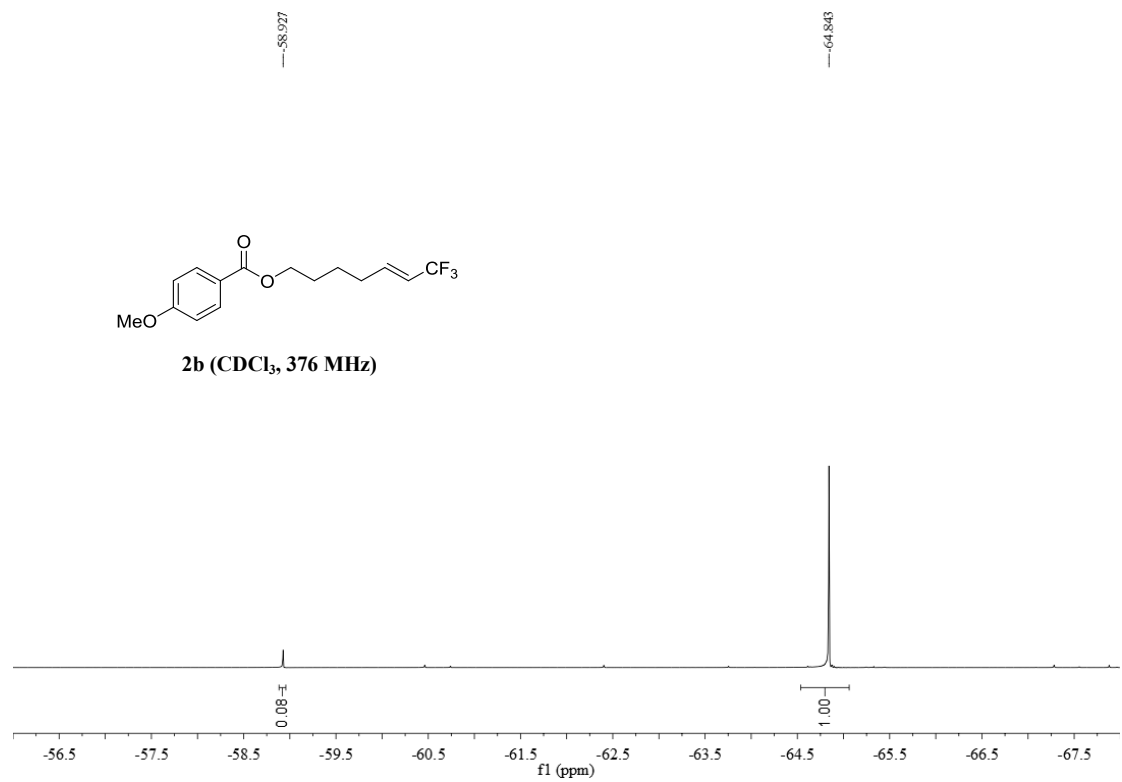

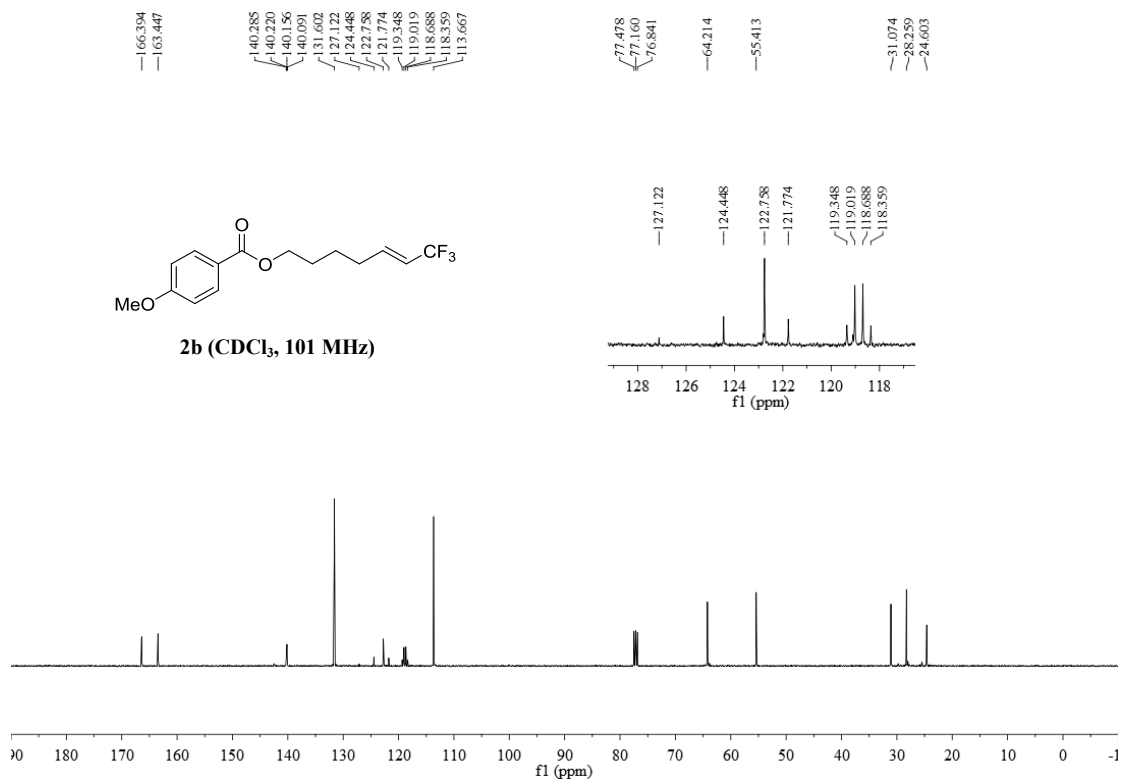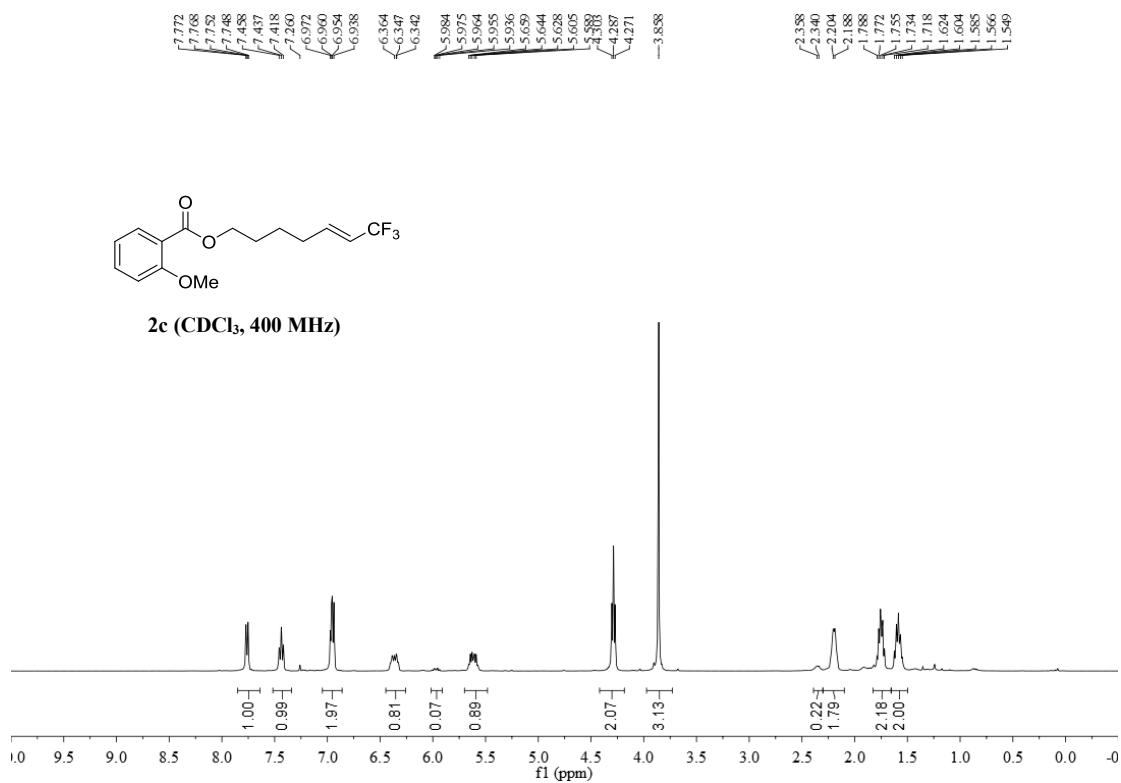

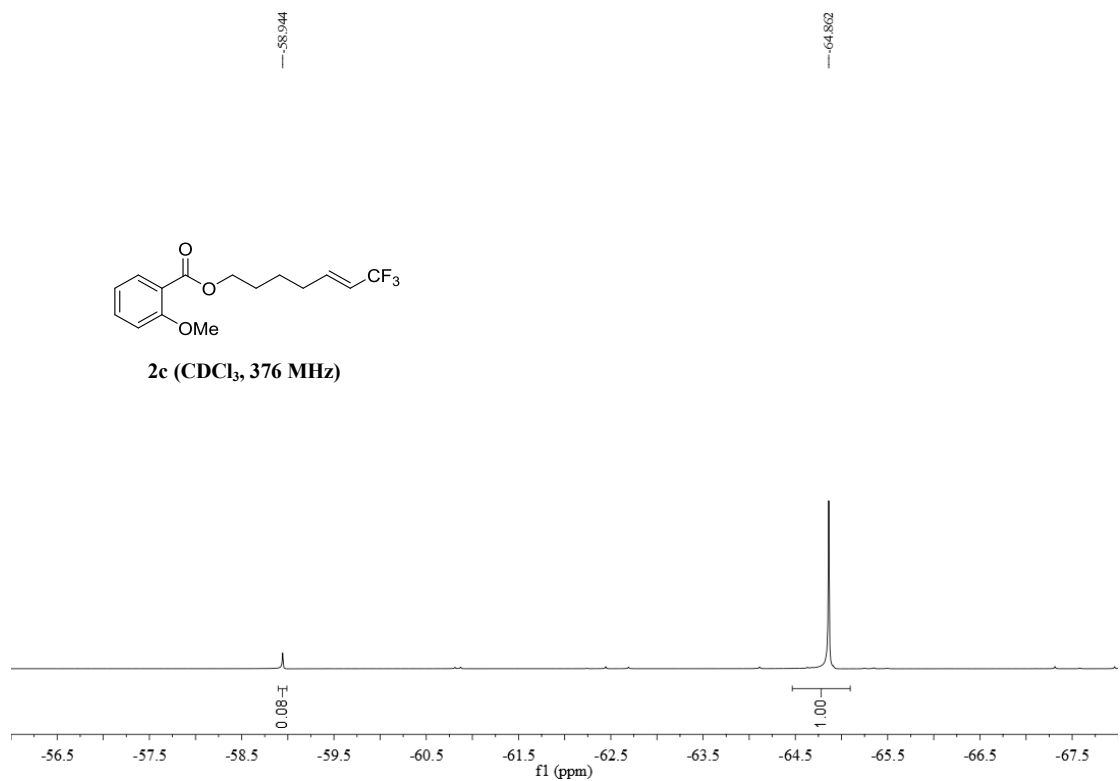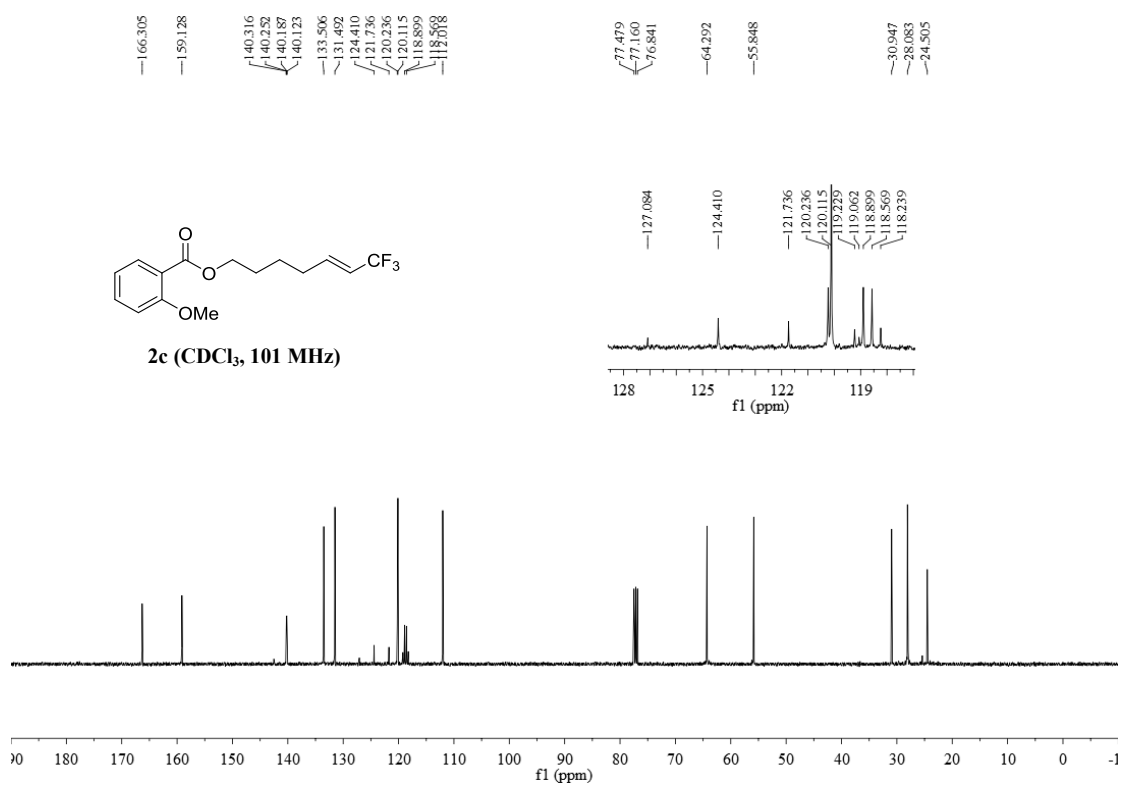



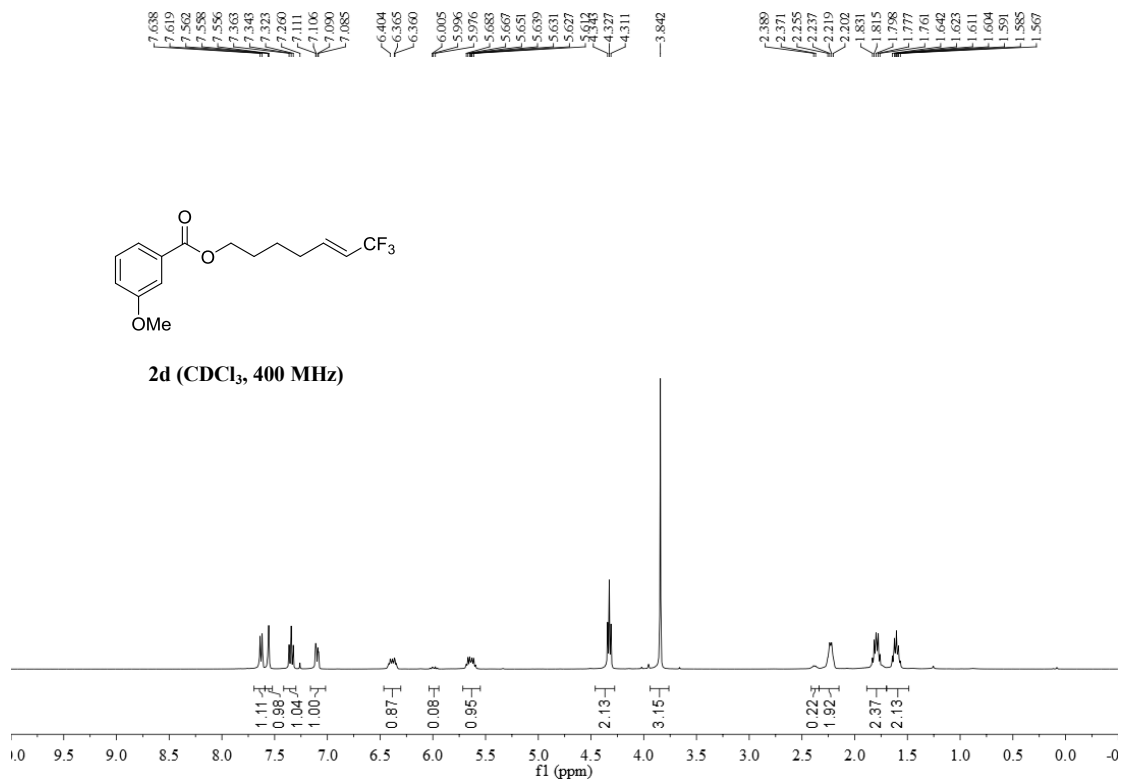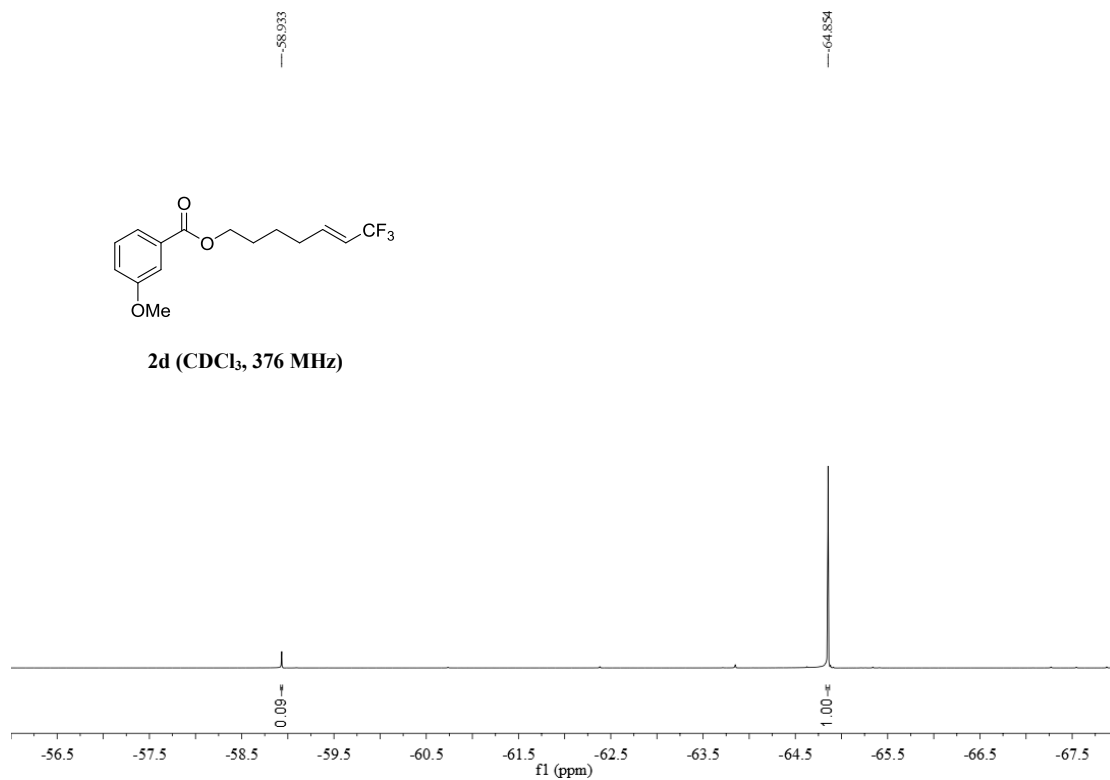

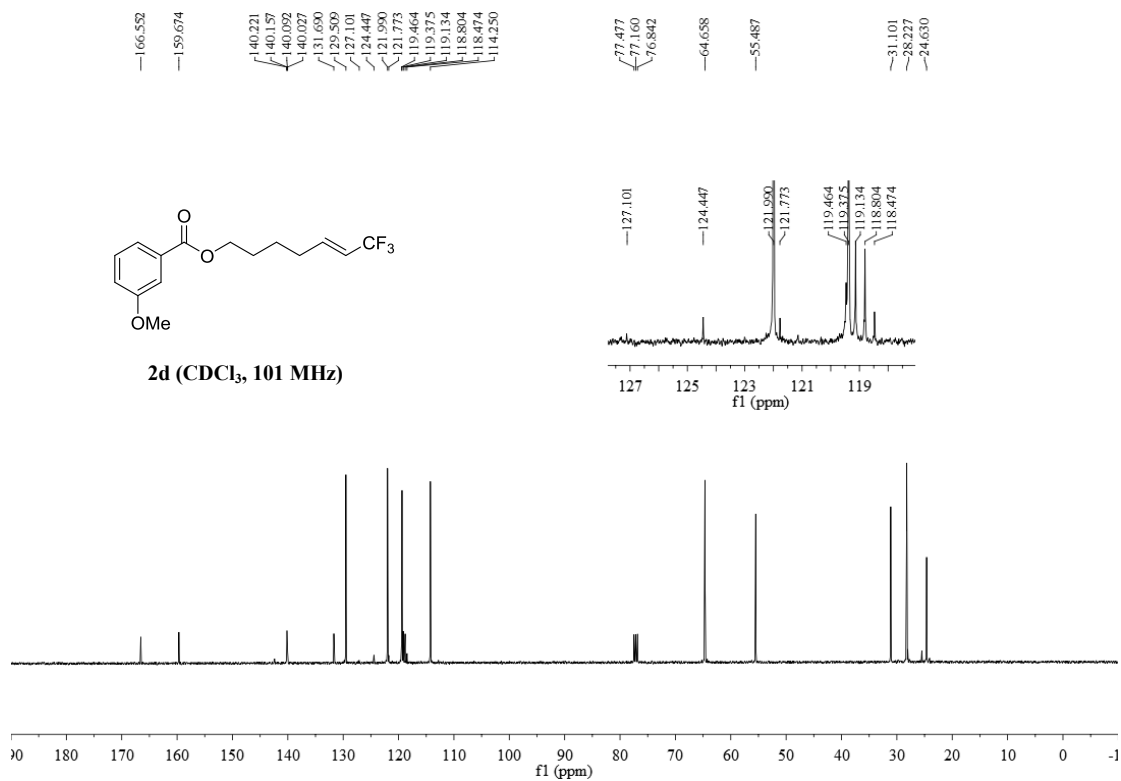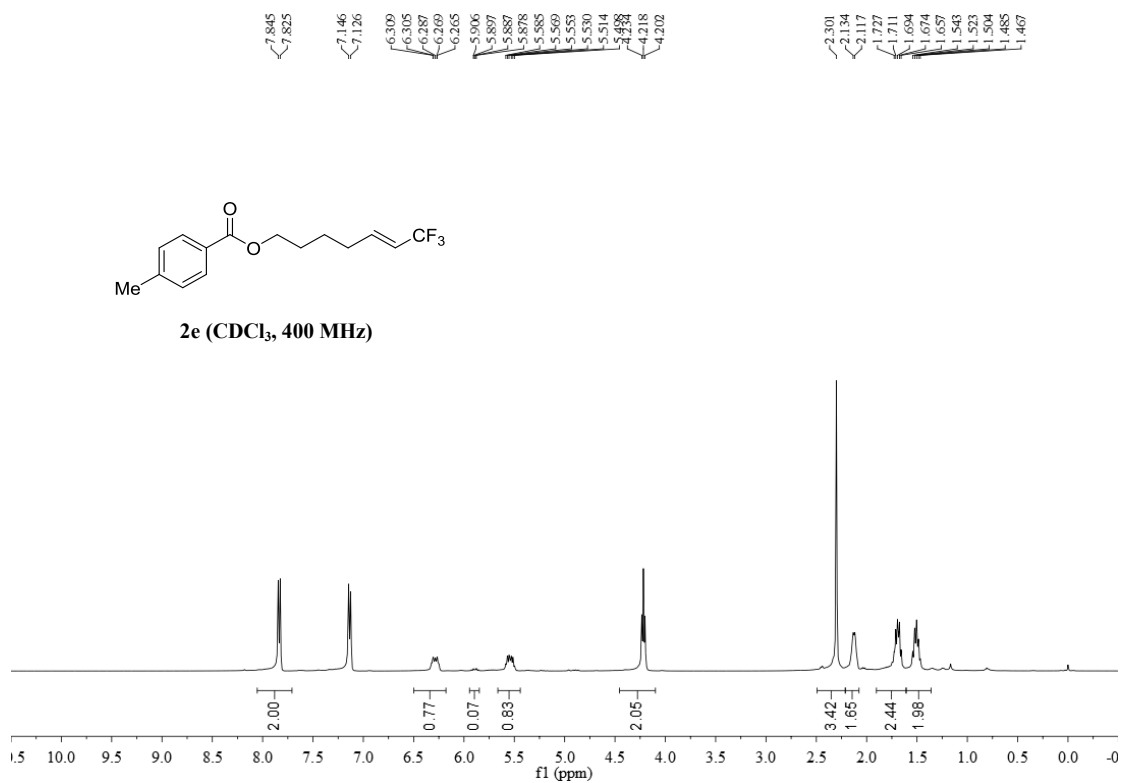

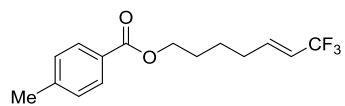

2e (CDCl<sub>3</sub>, 376 MHz)

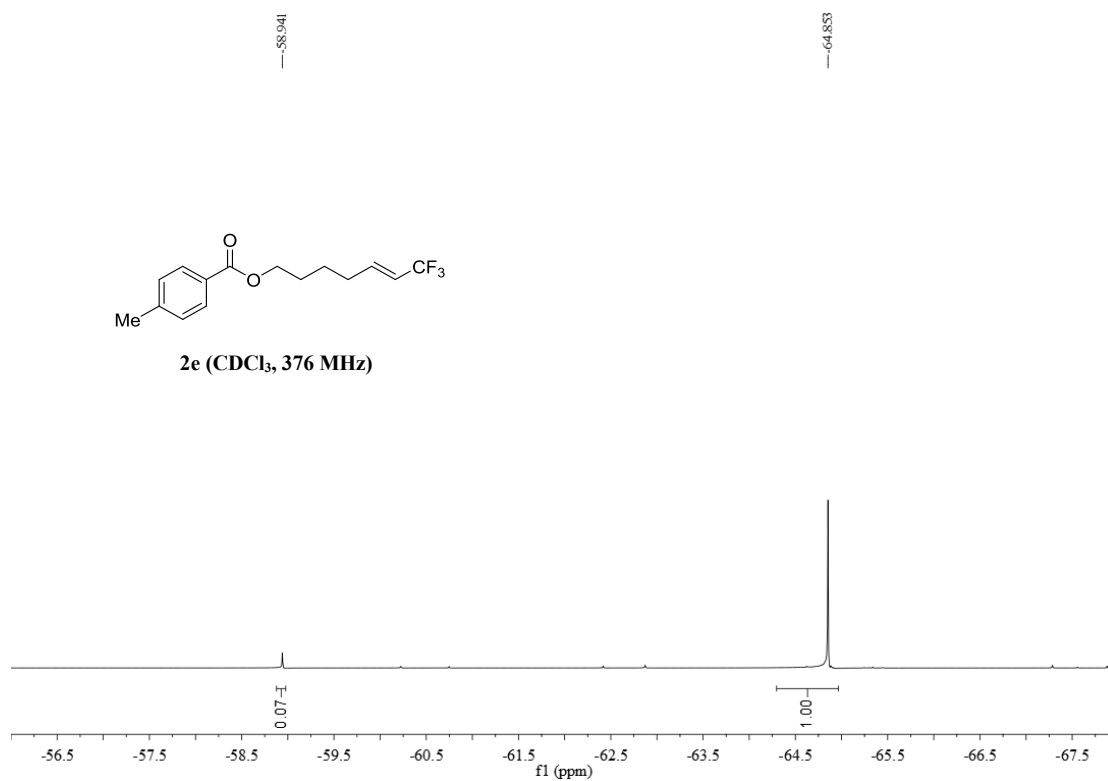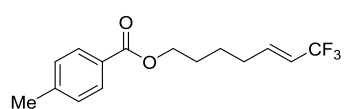

2e (CDCl<sub>3</sub>, 101 MHz)

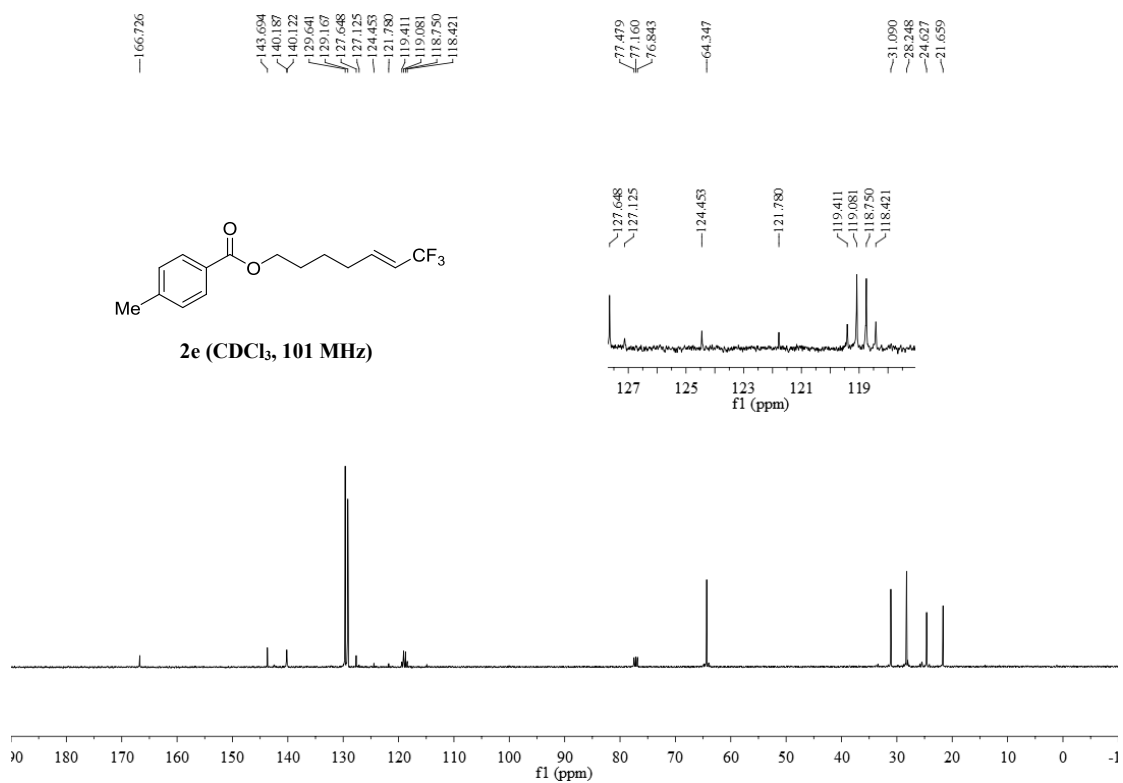

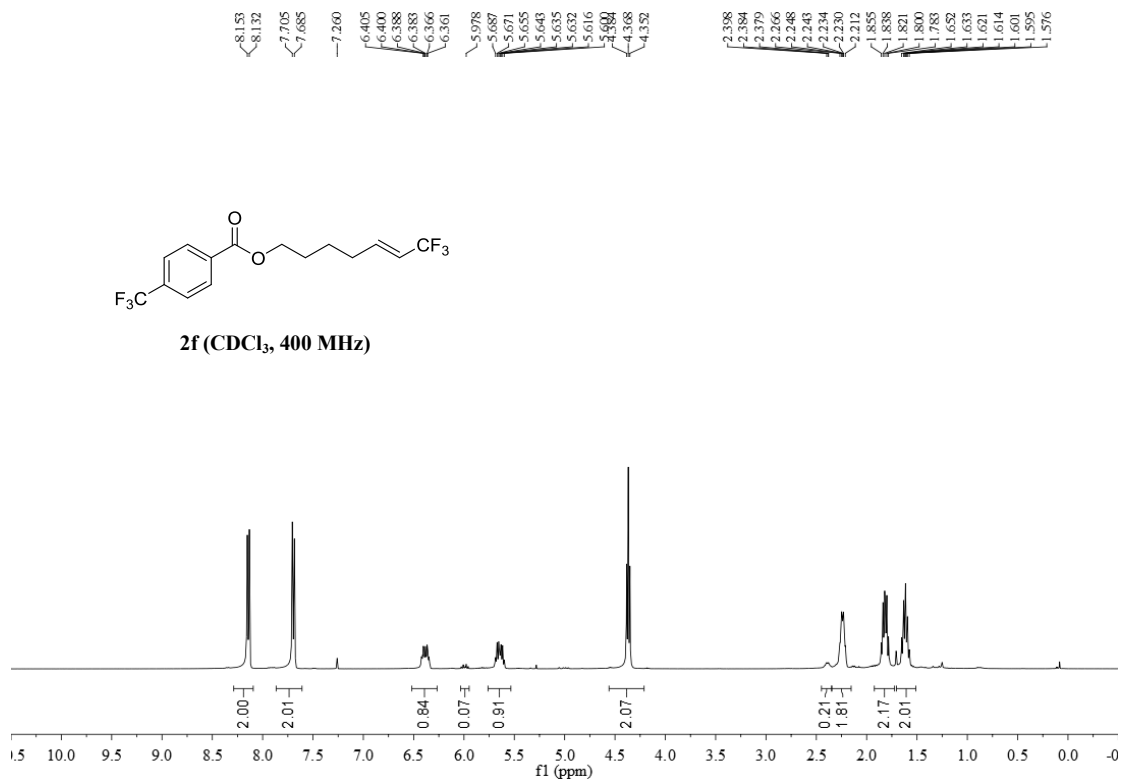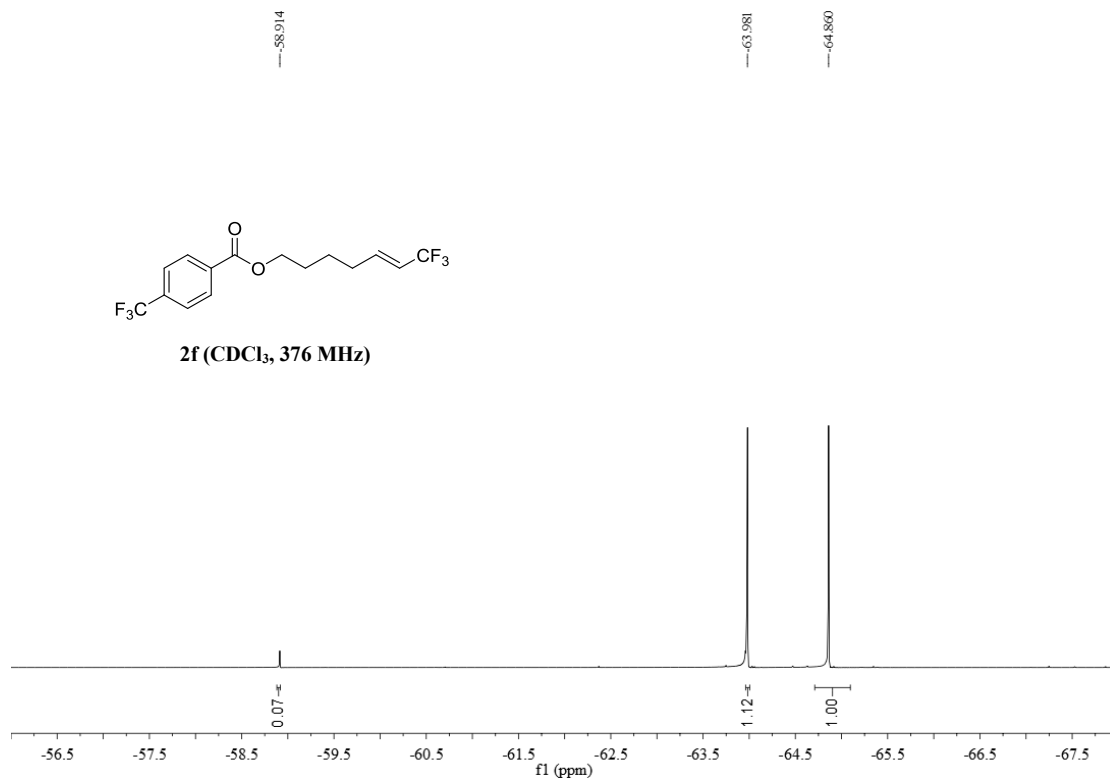

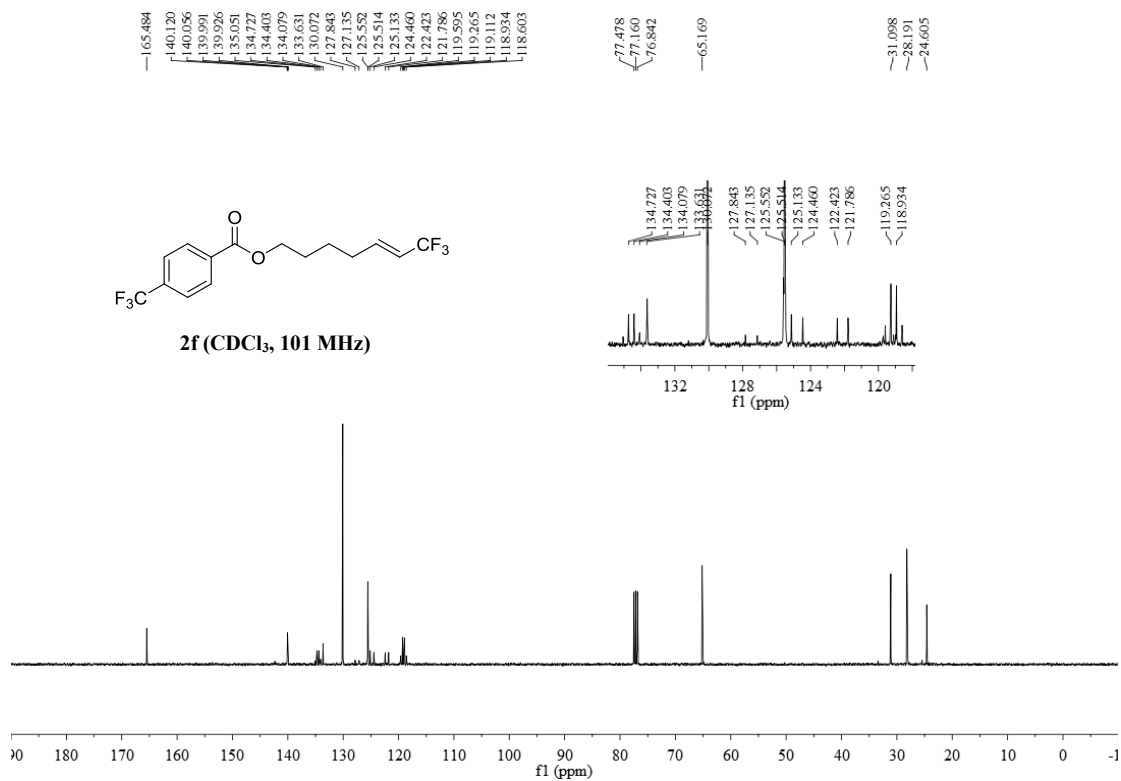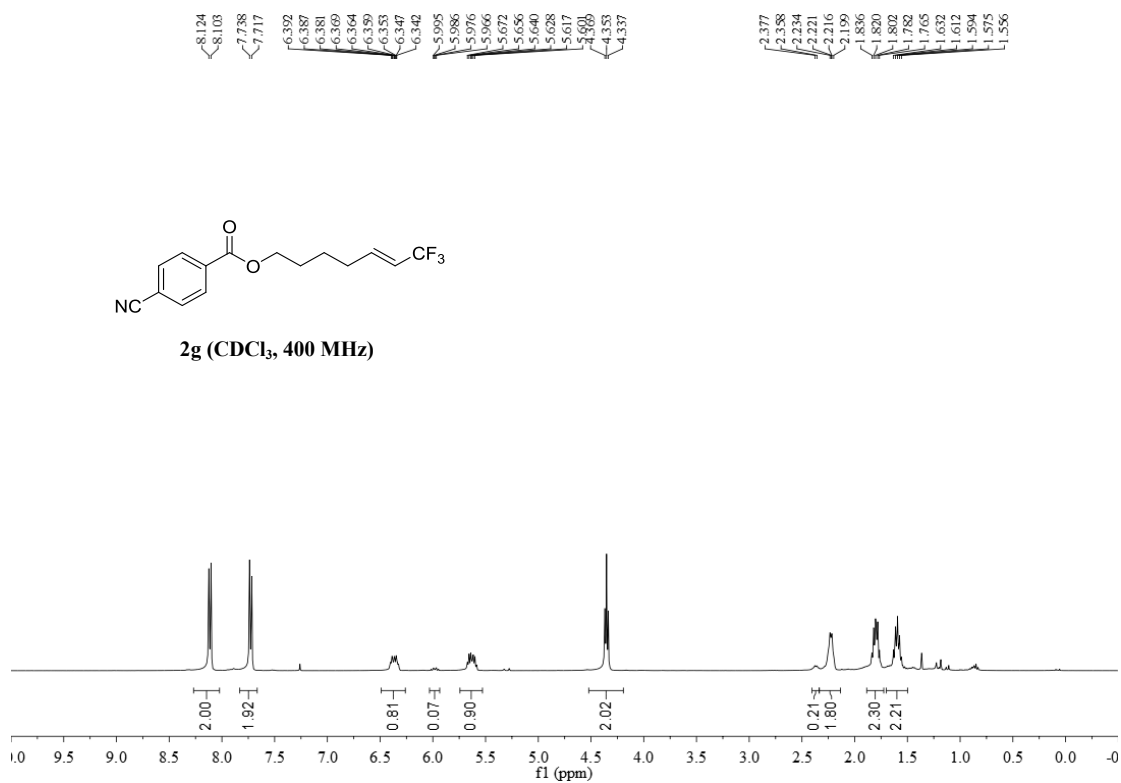

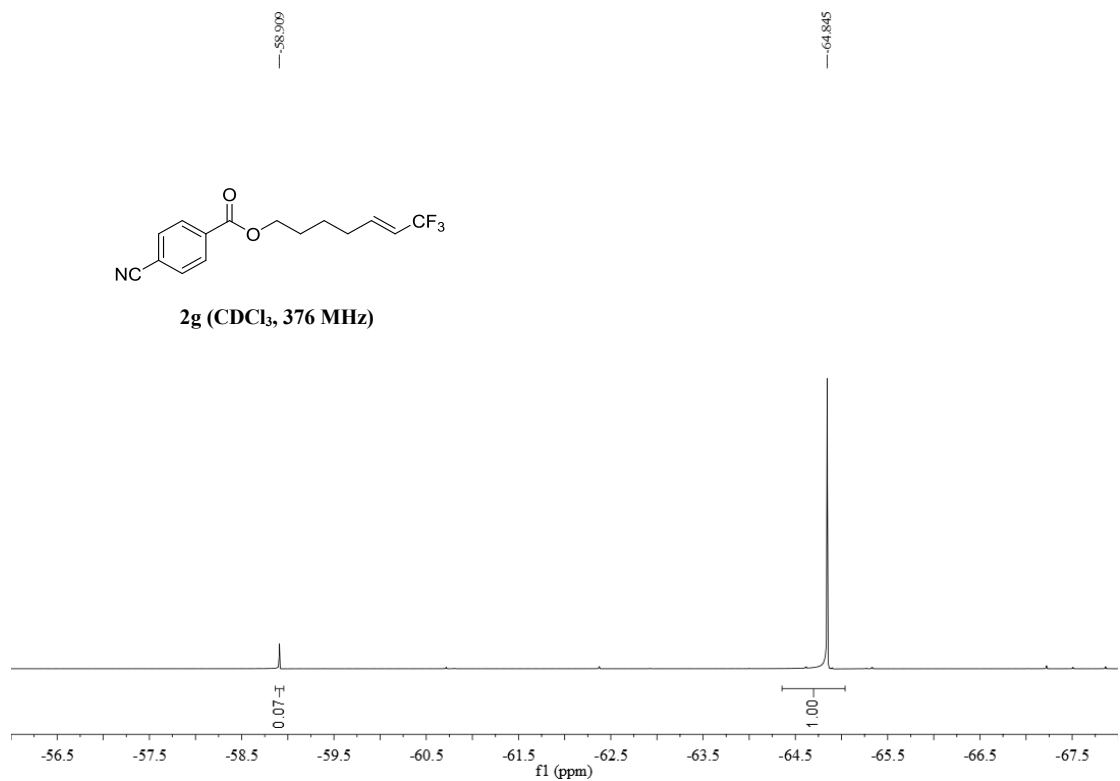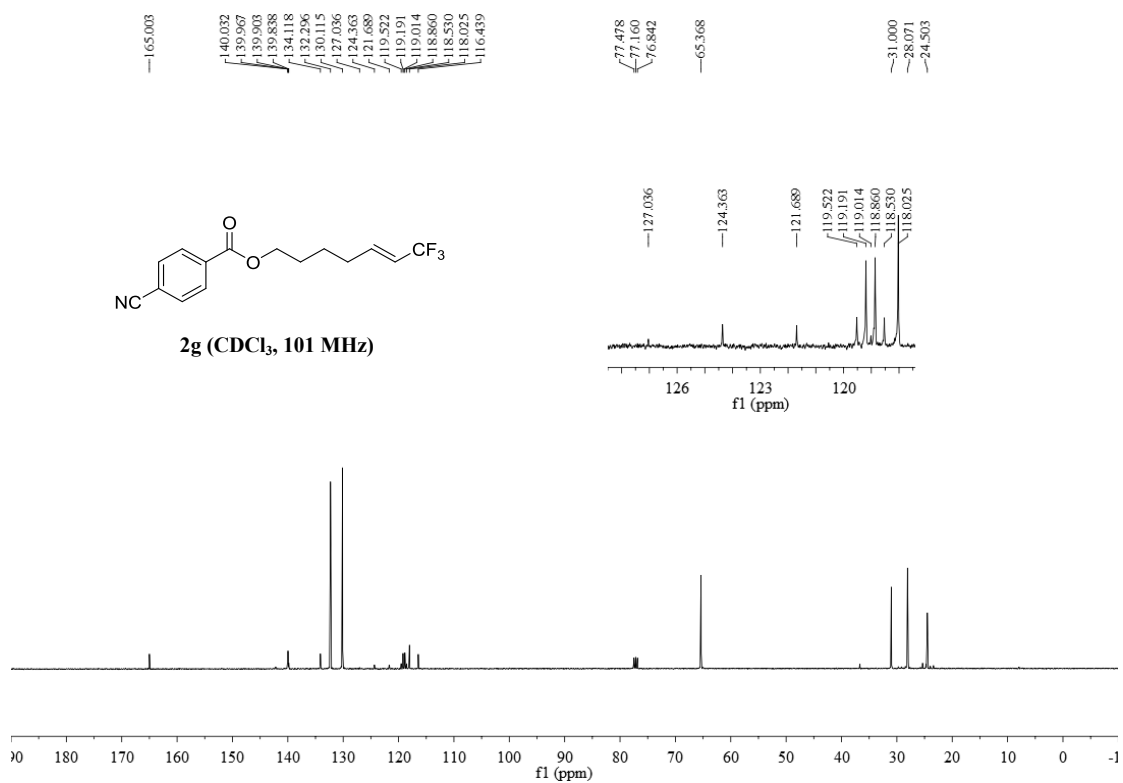

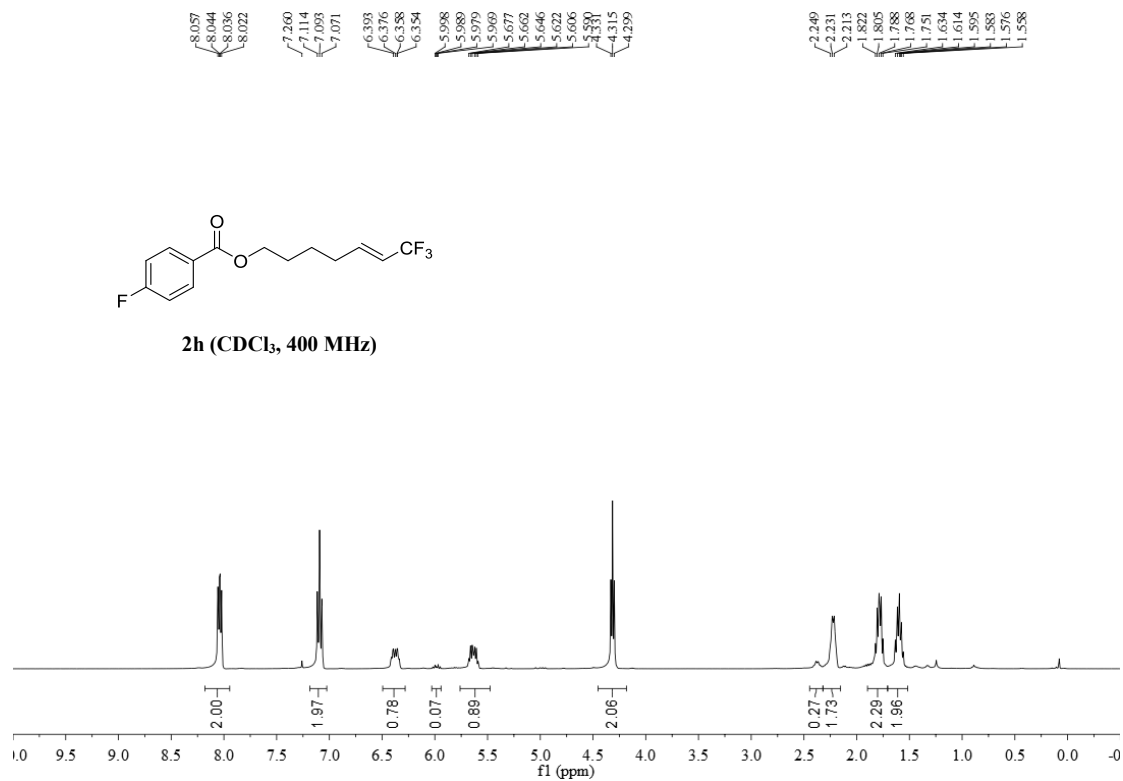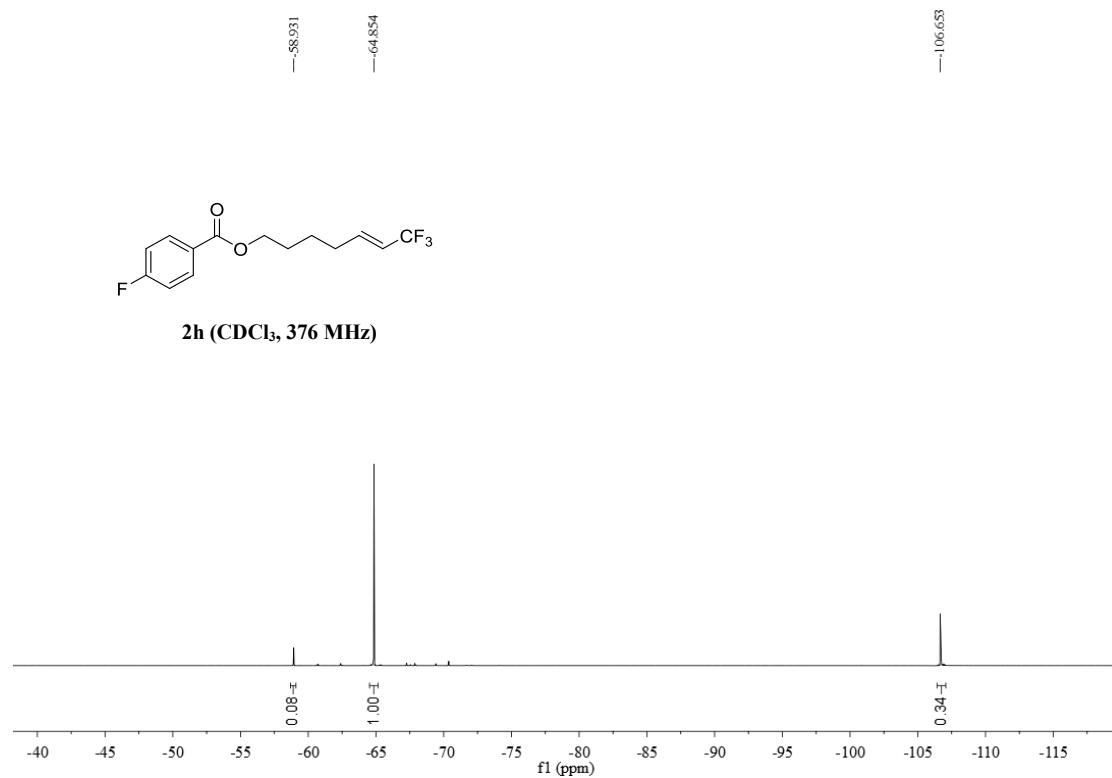

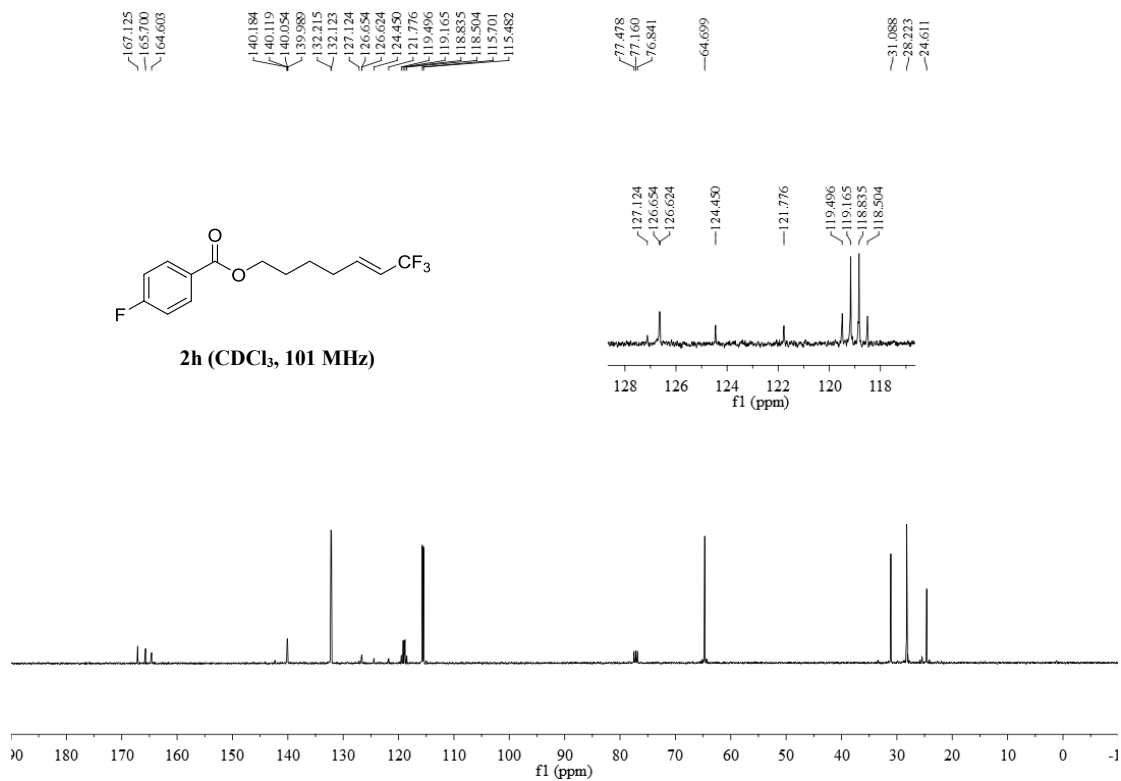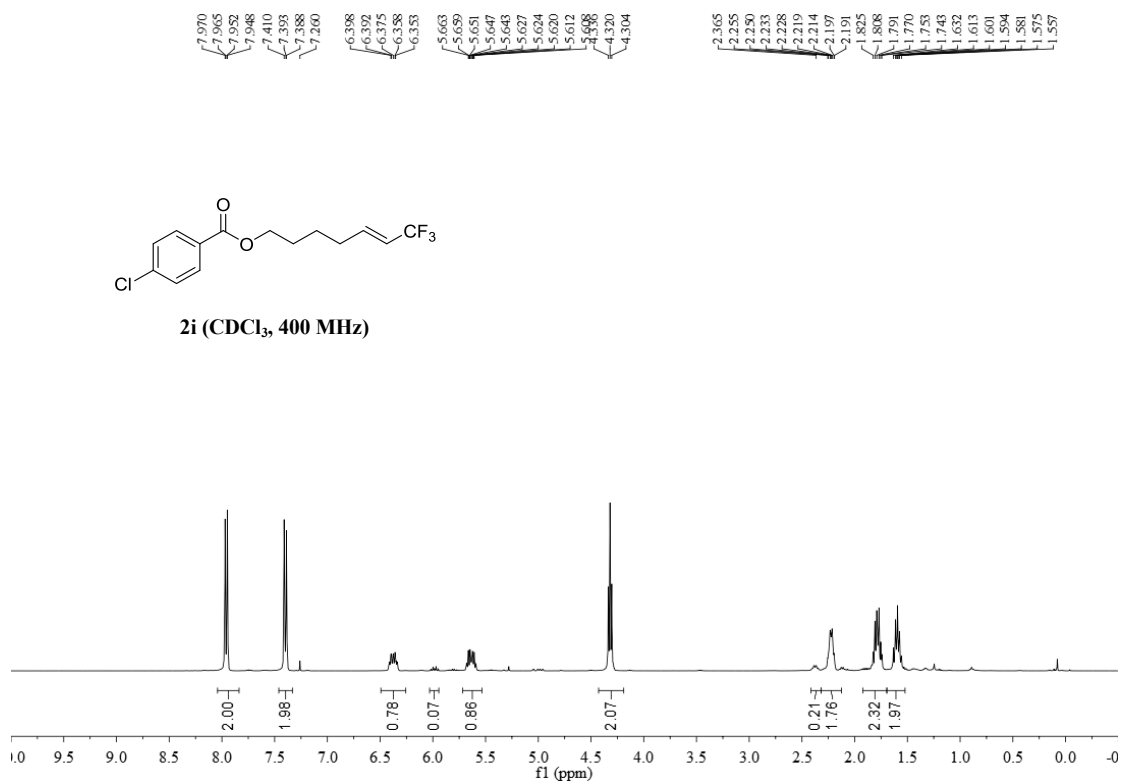



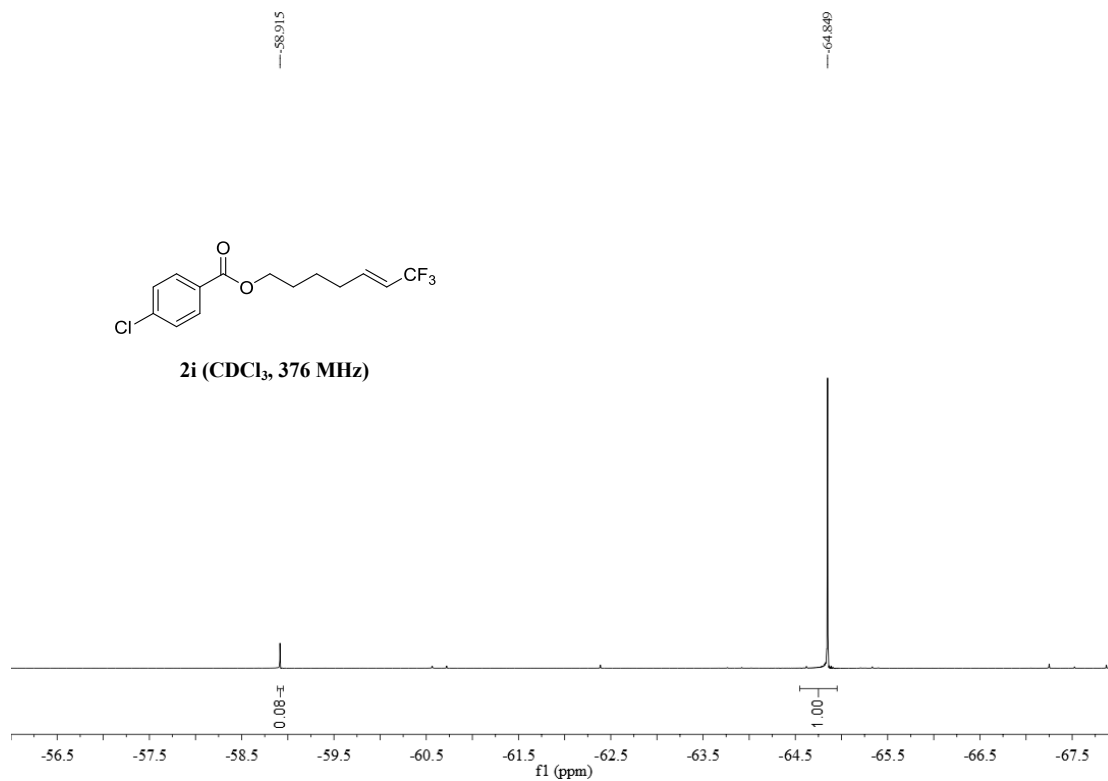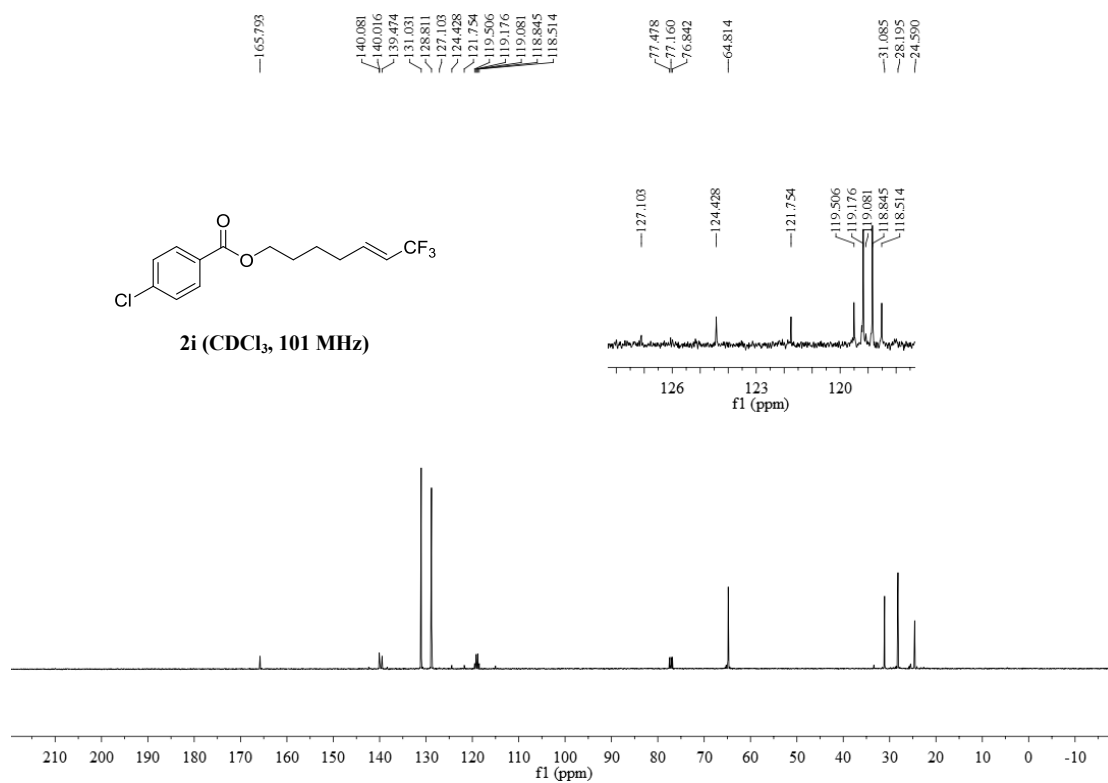

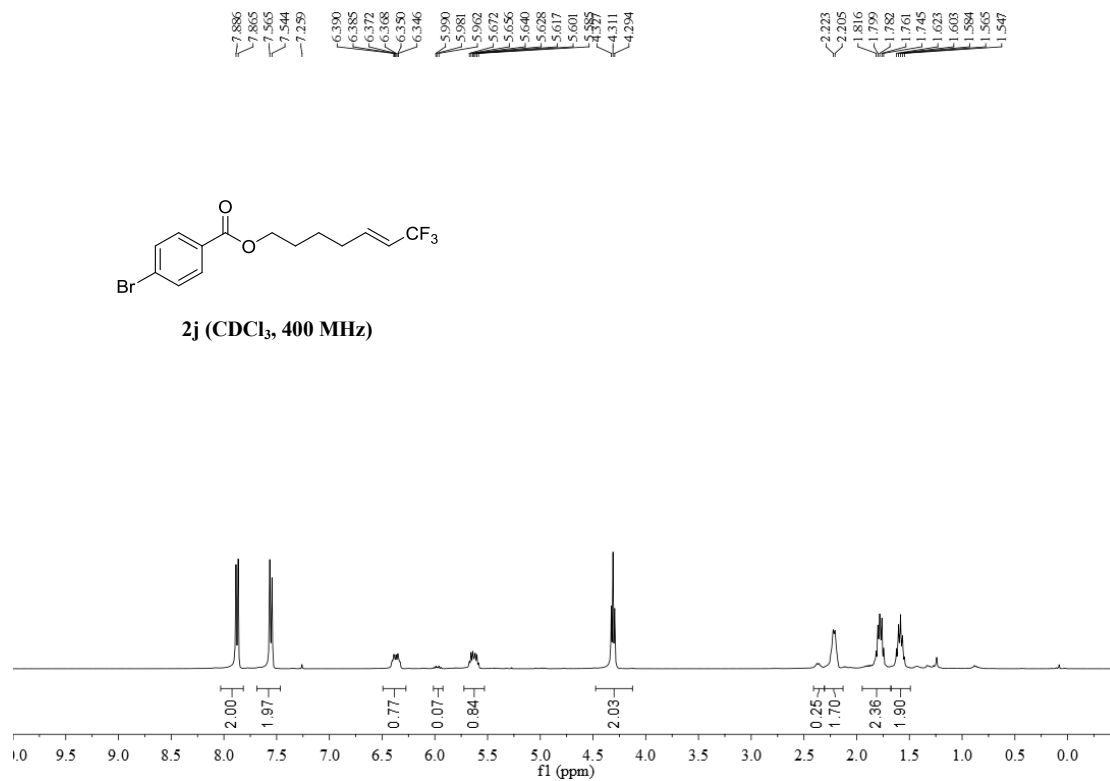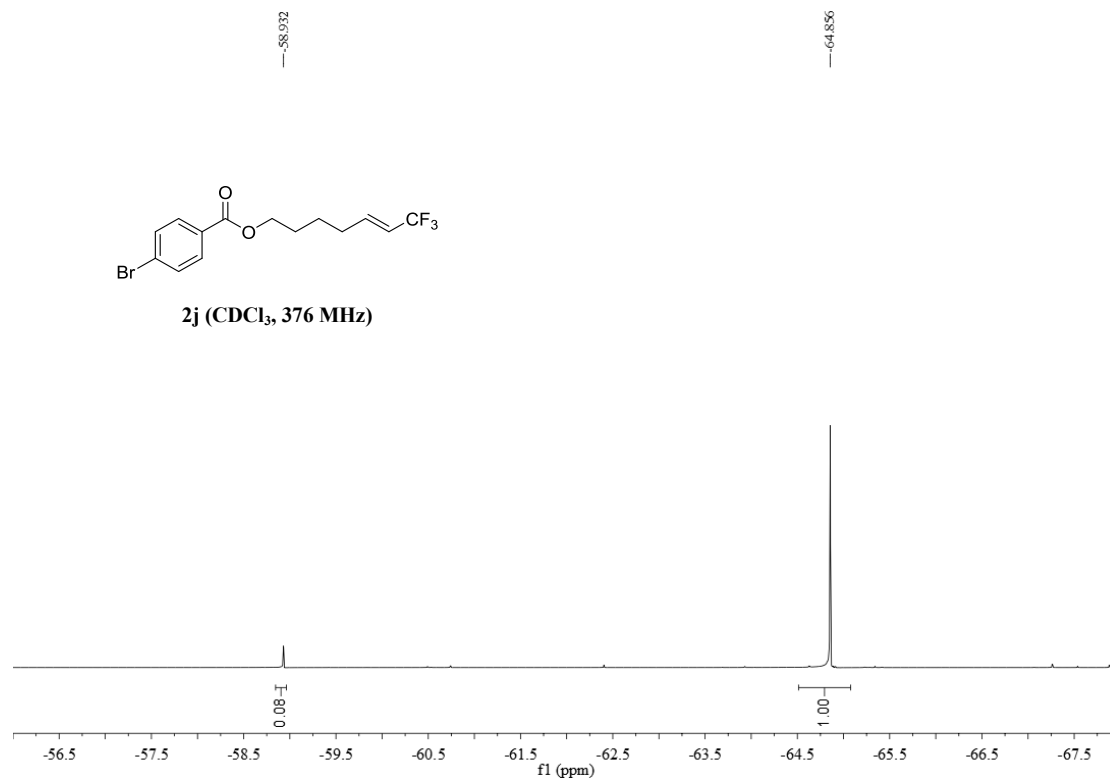

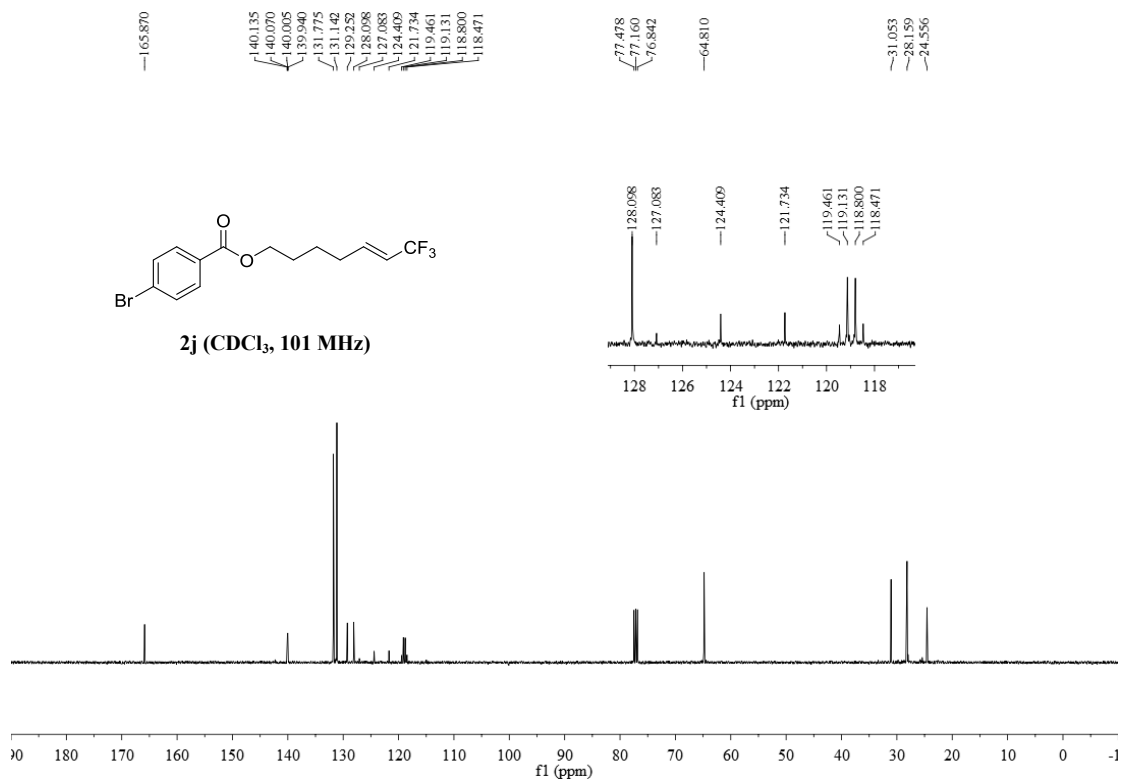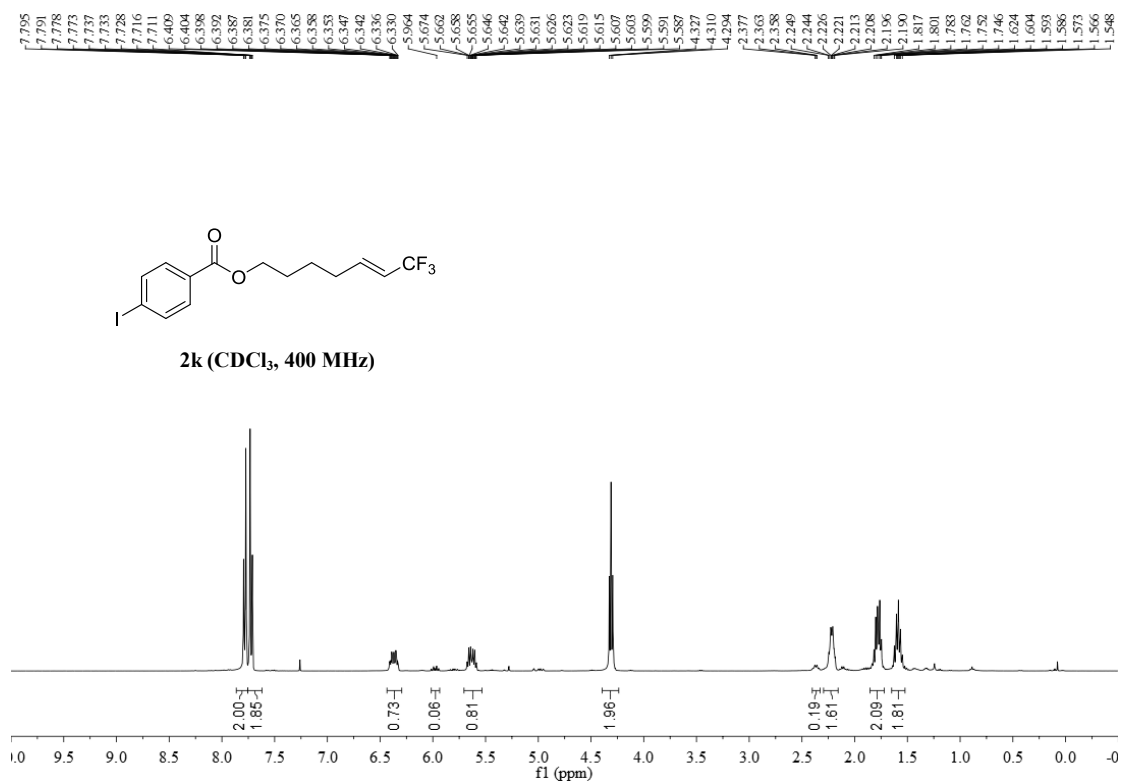

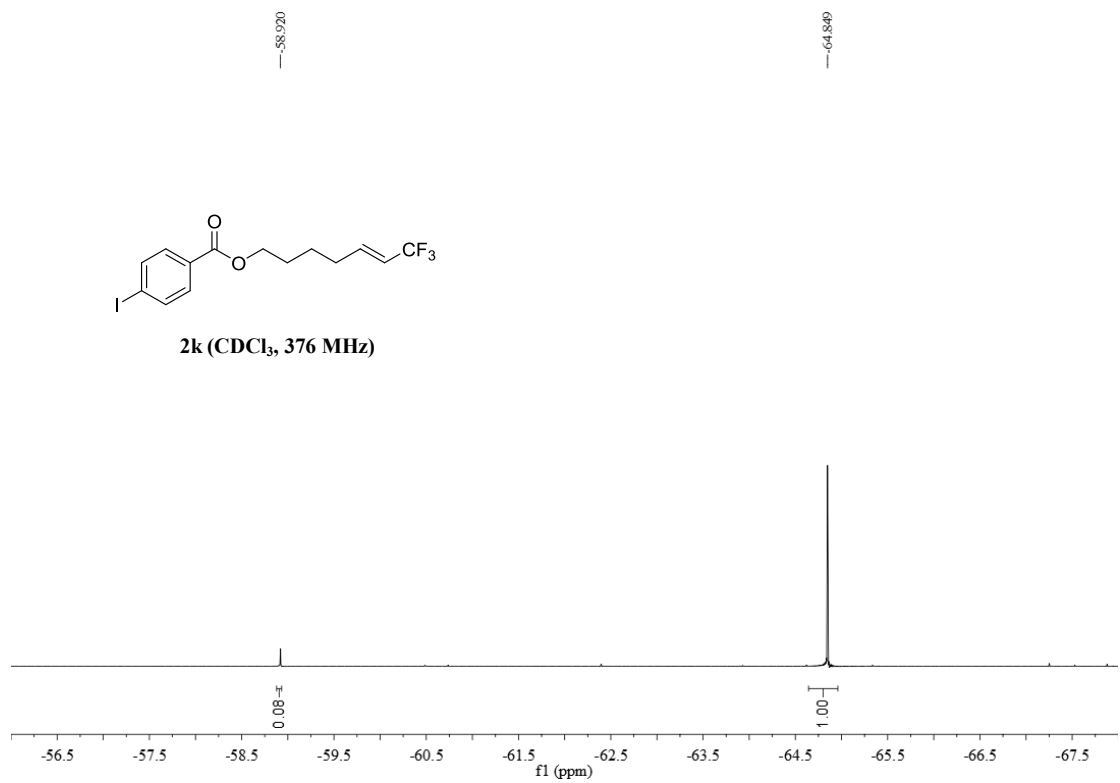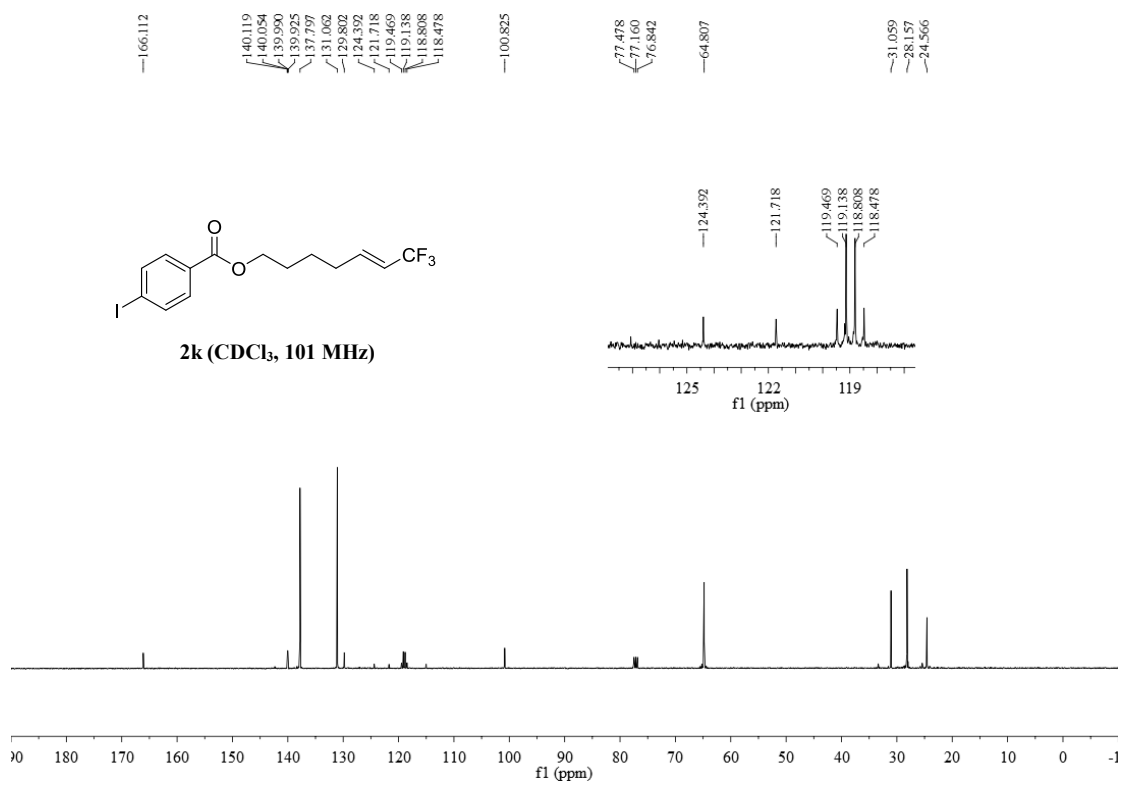

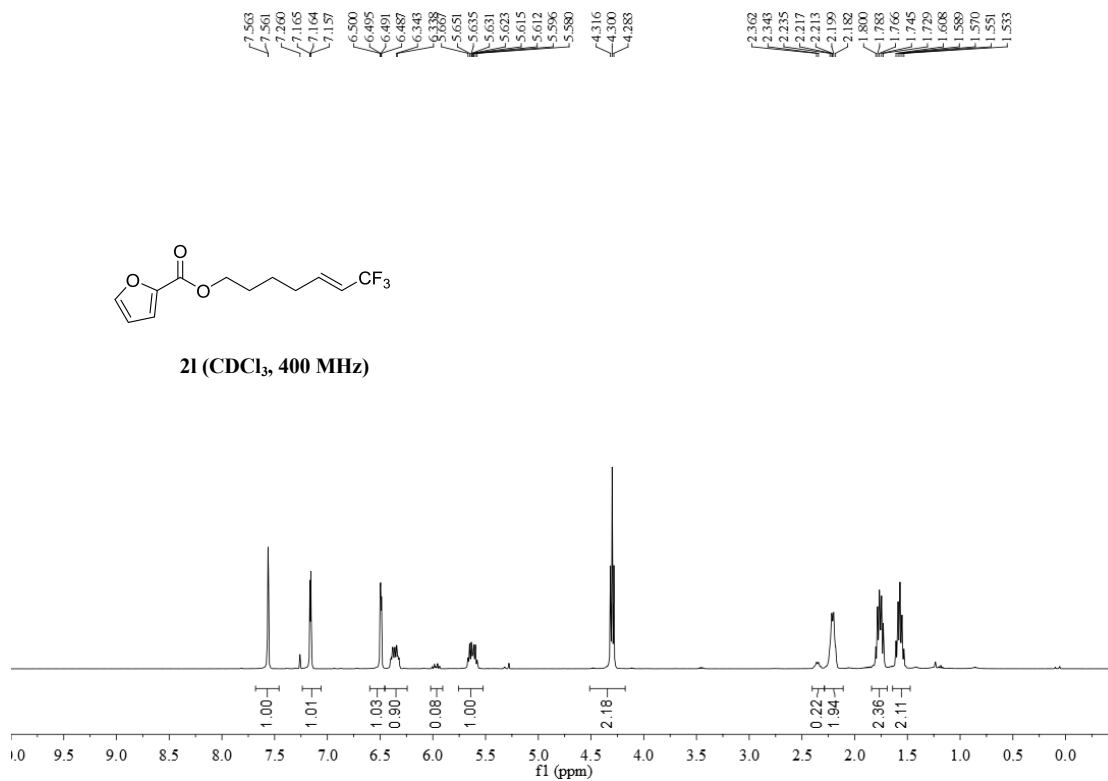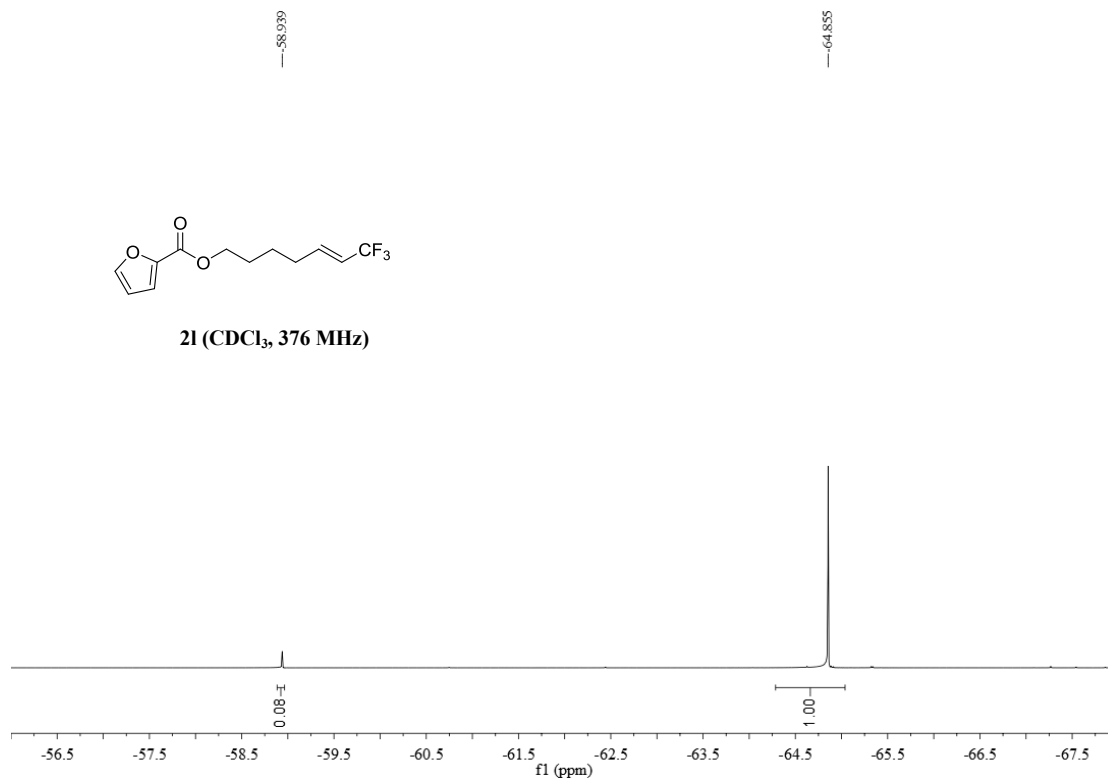

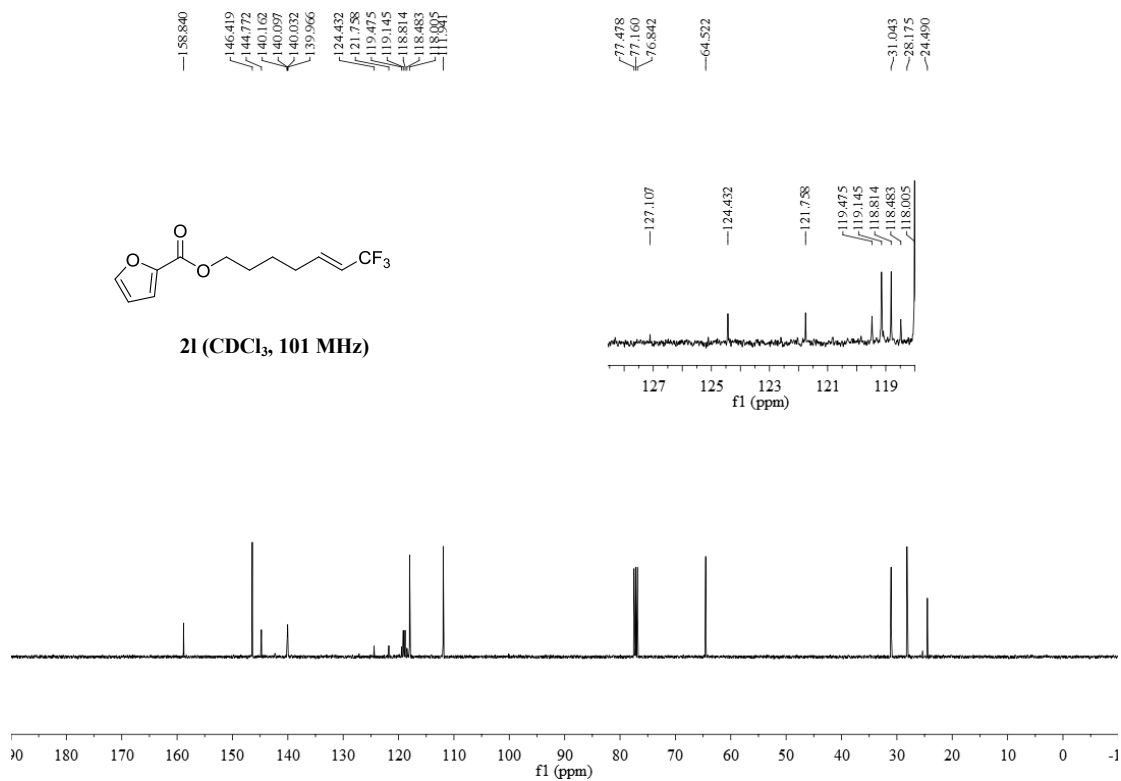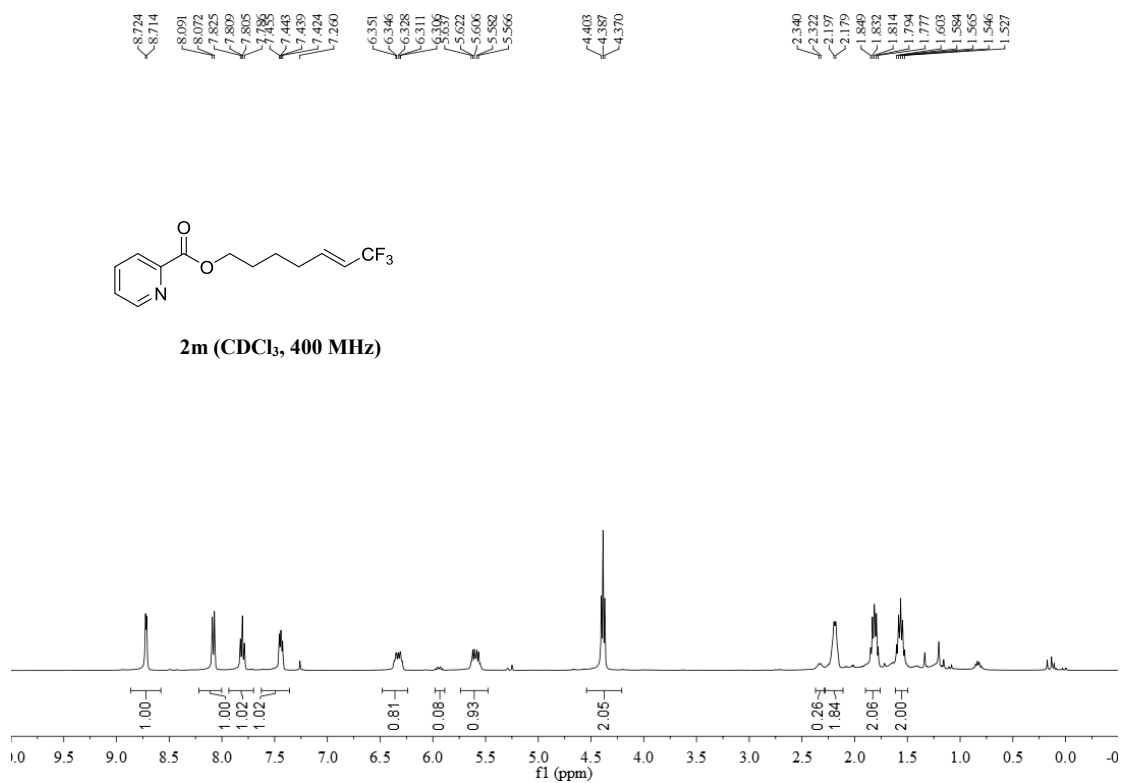

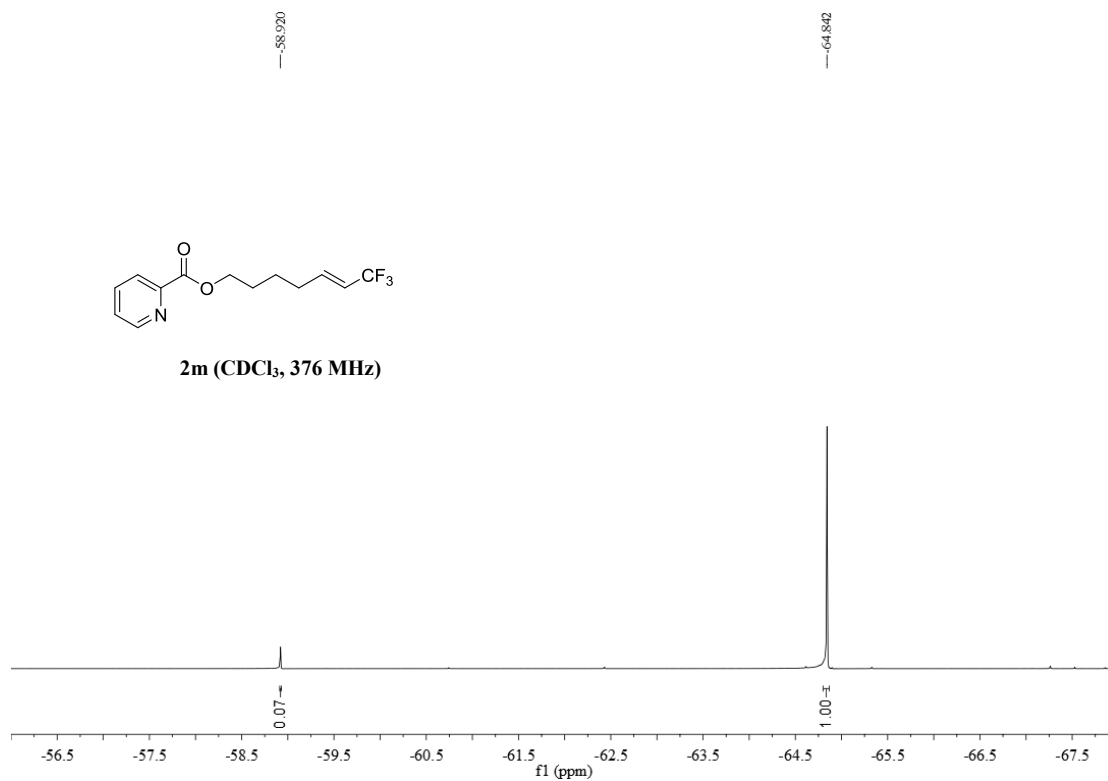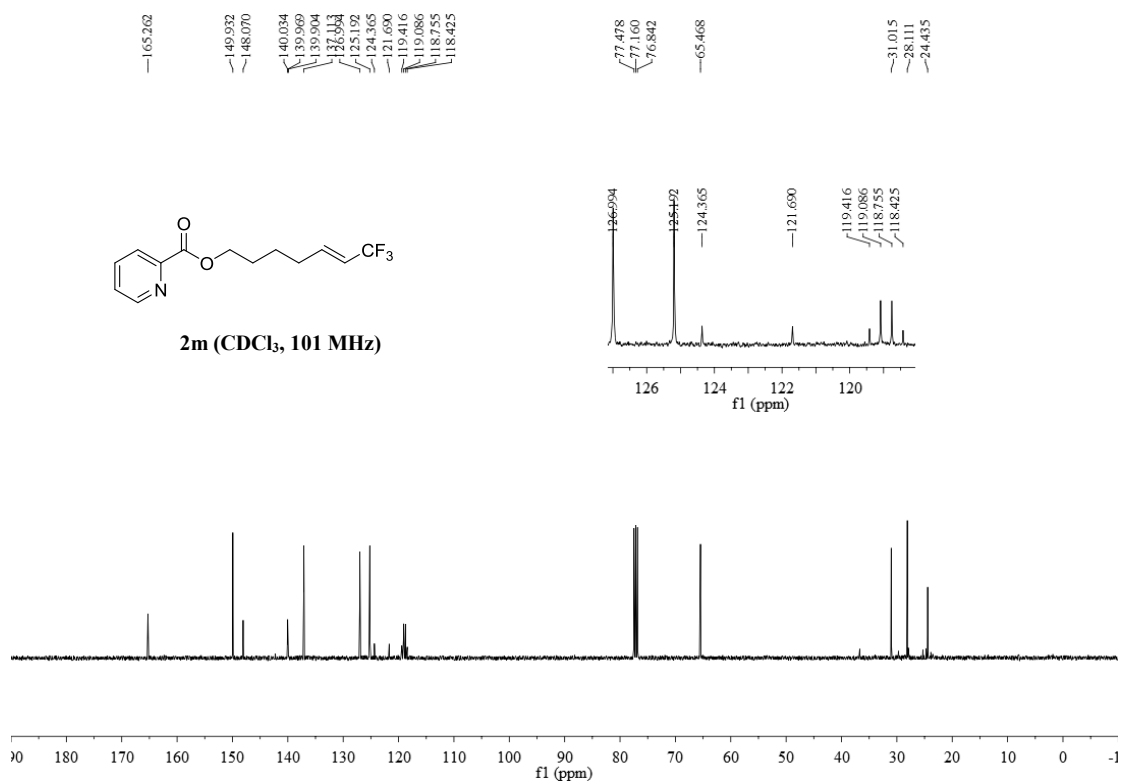

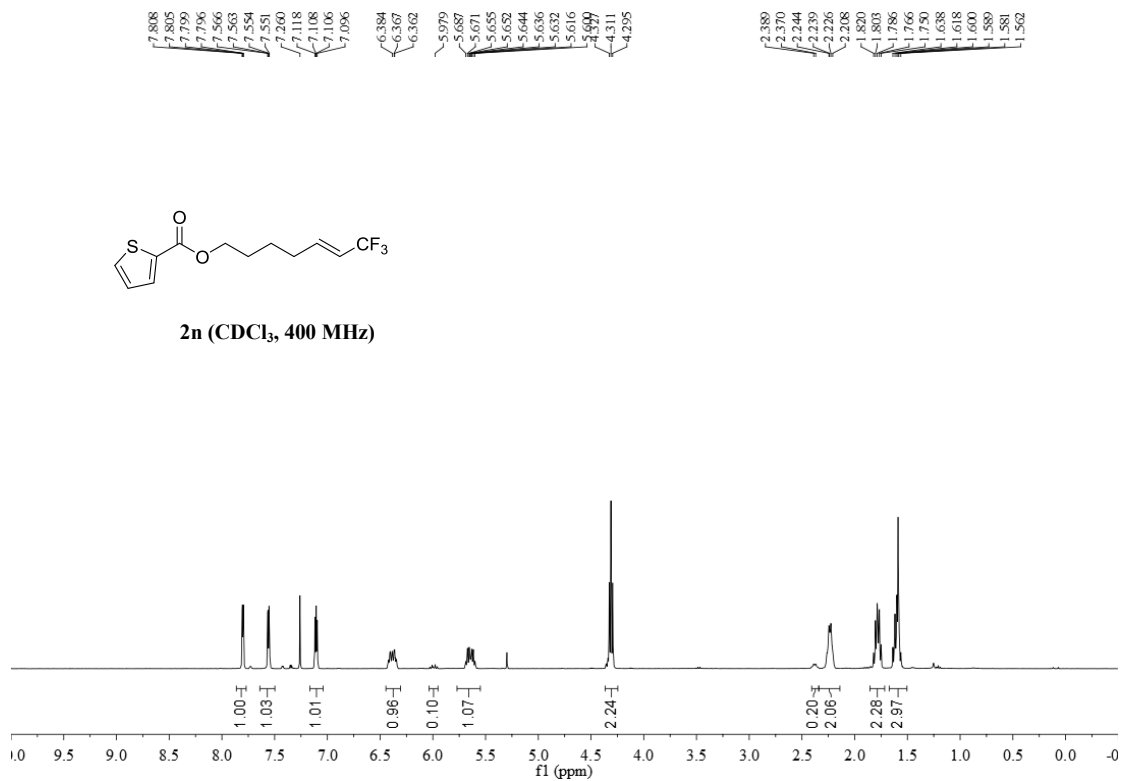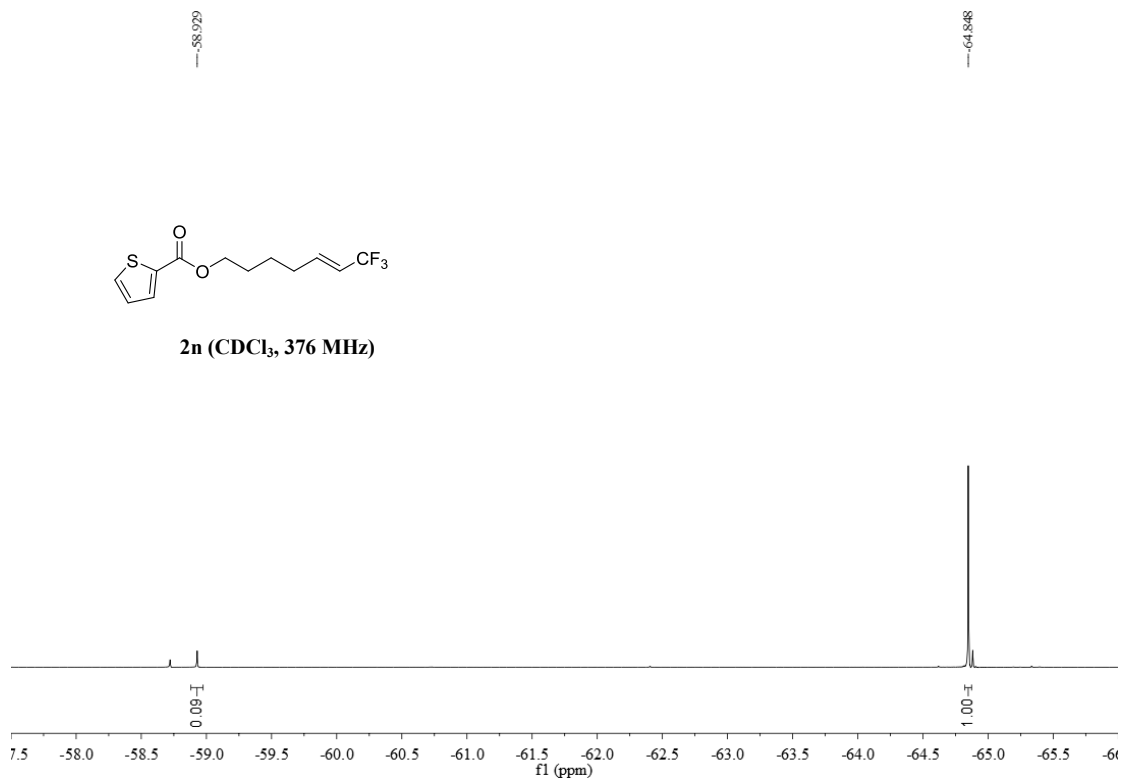



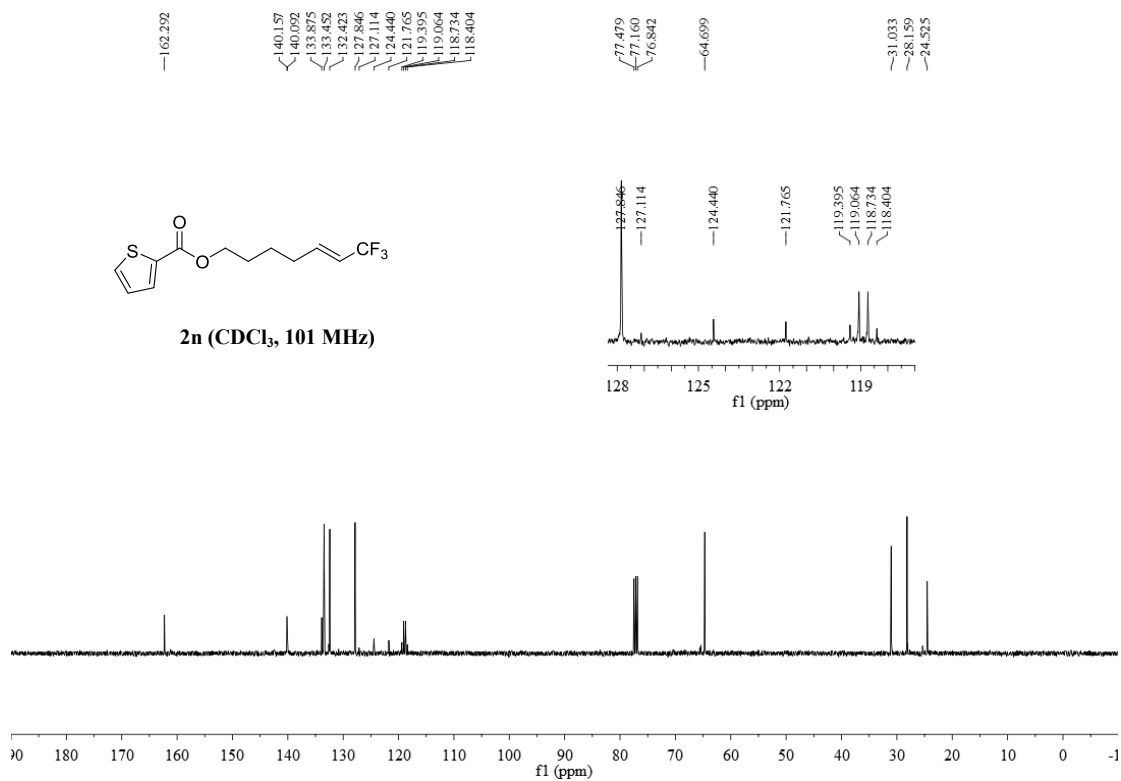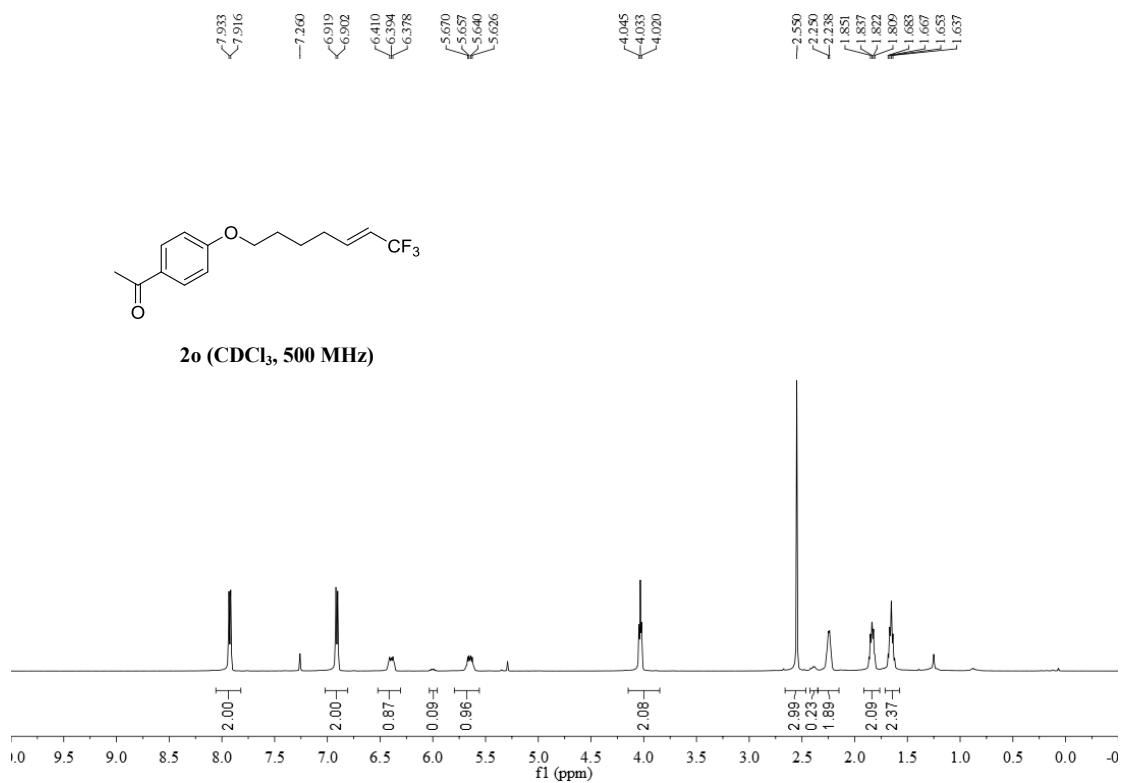

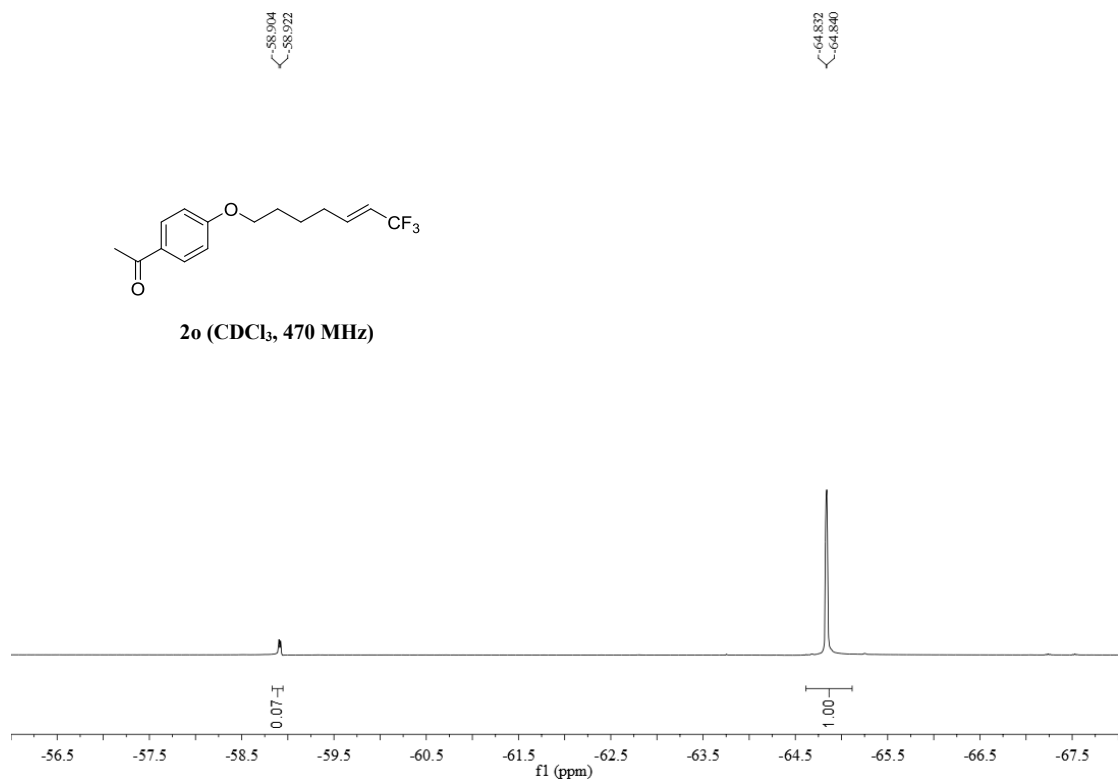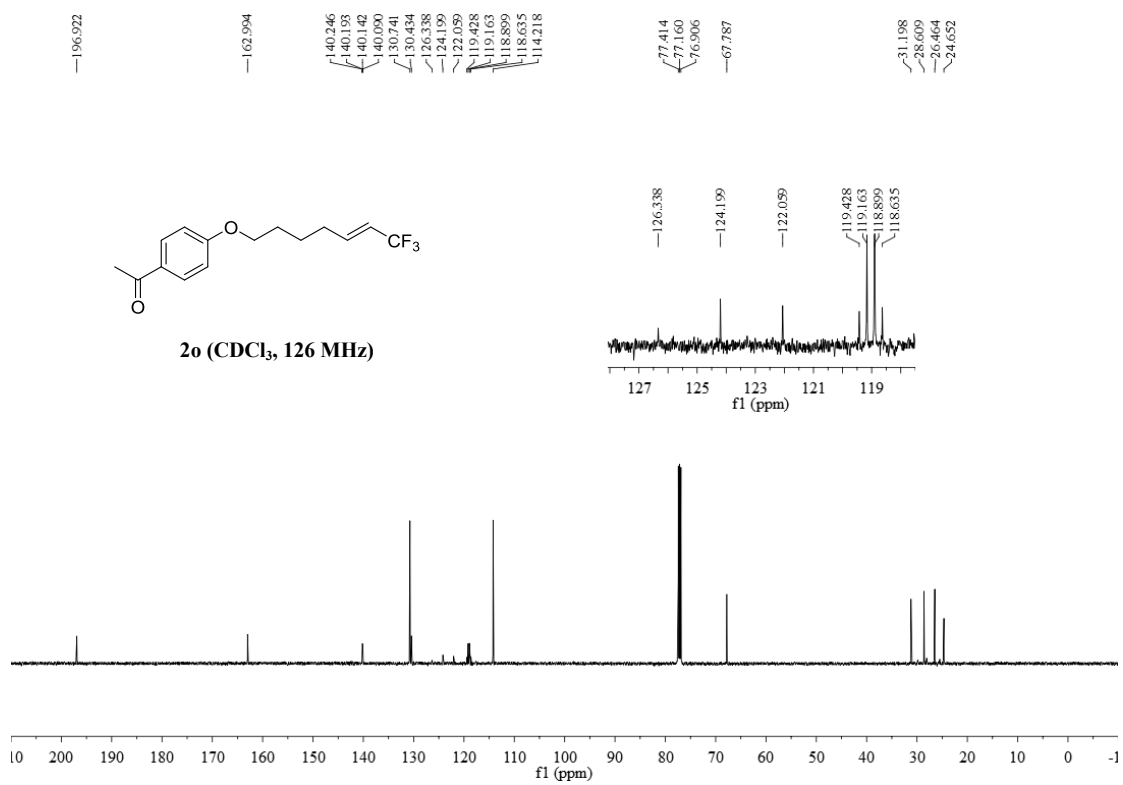

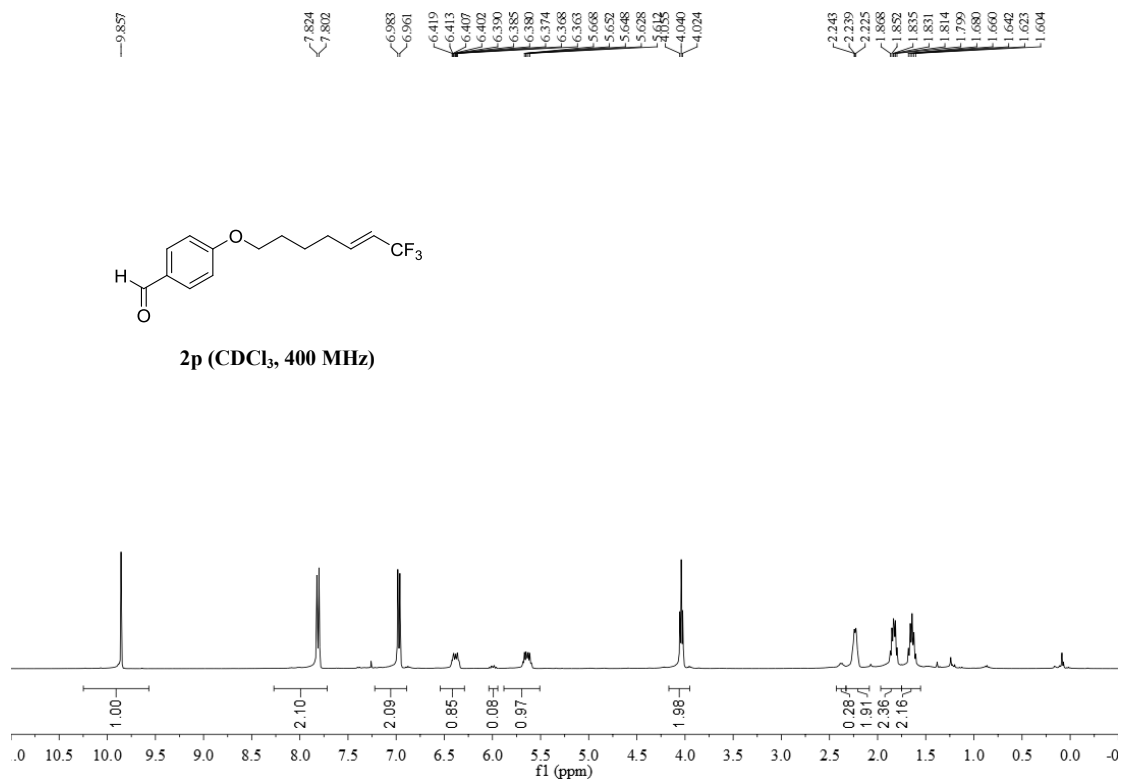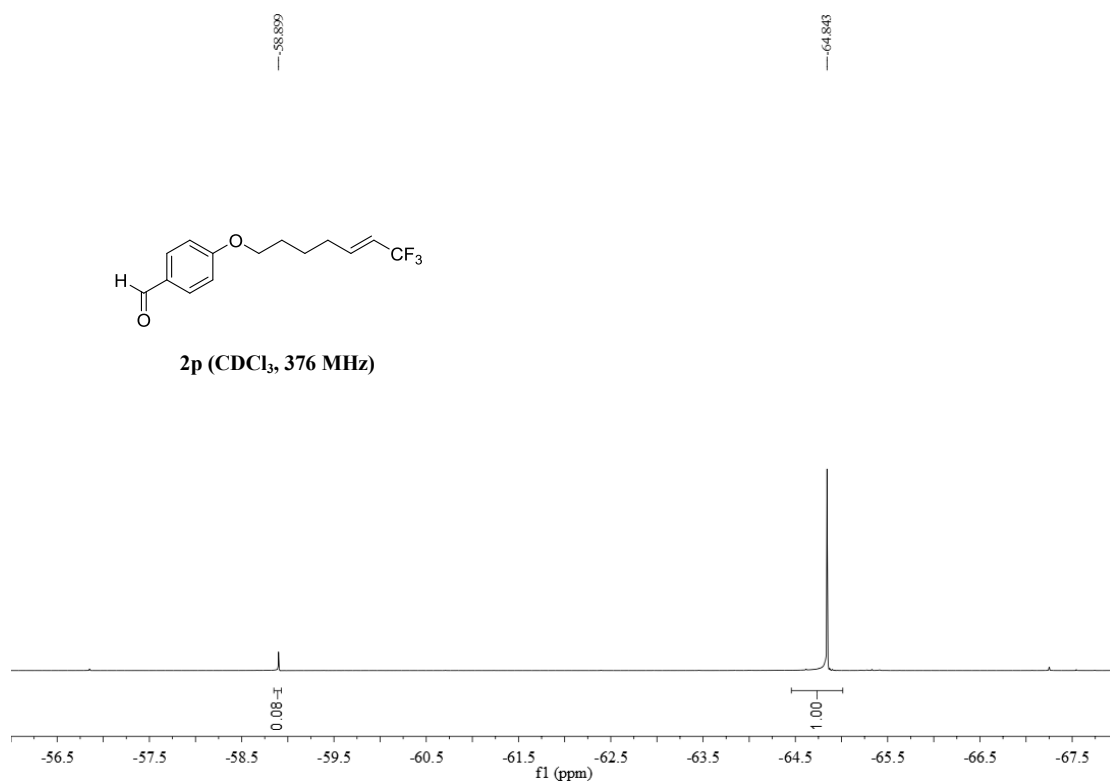

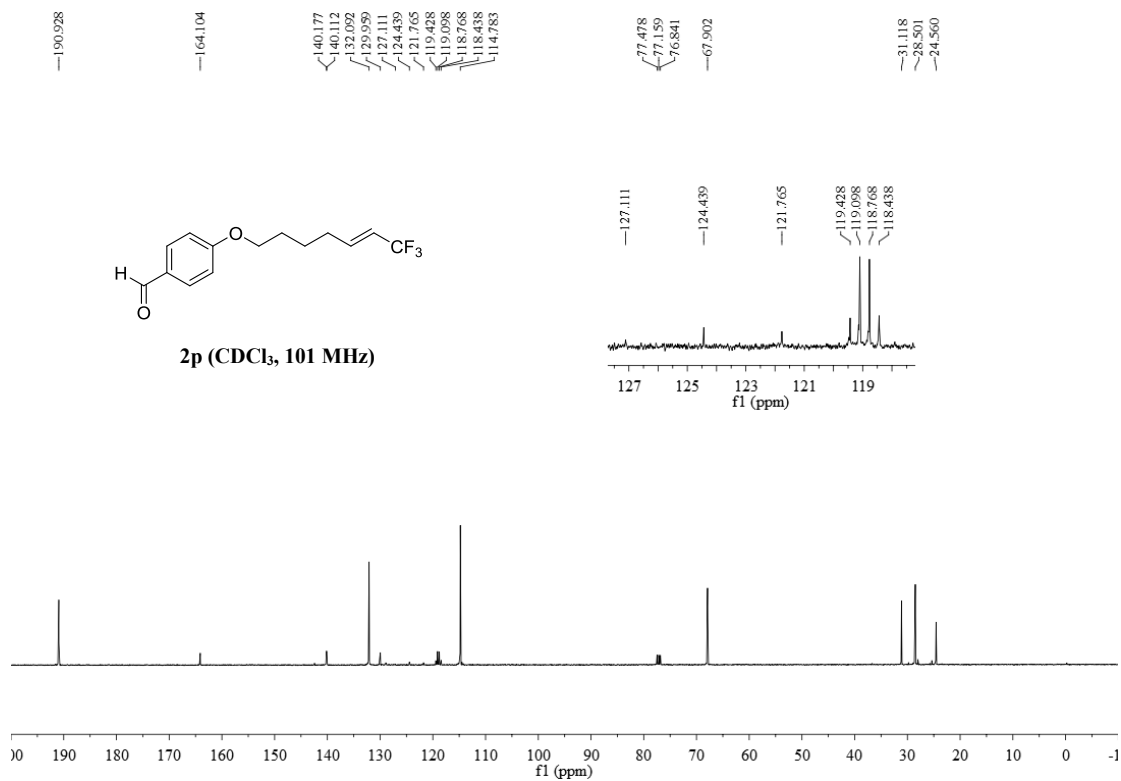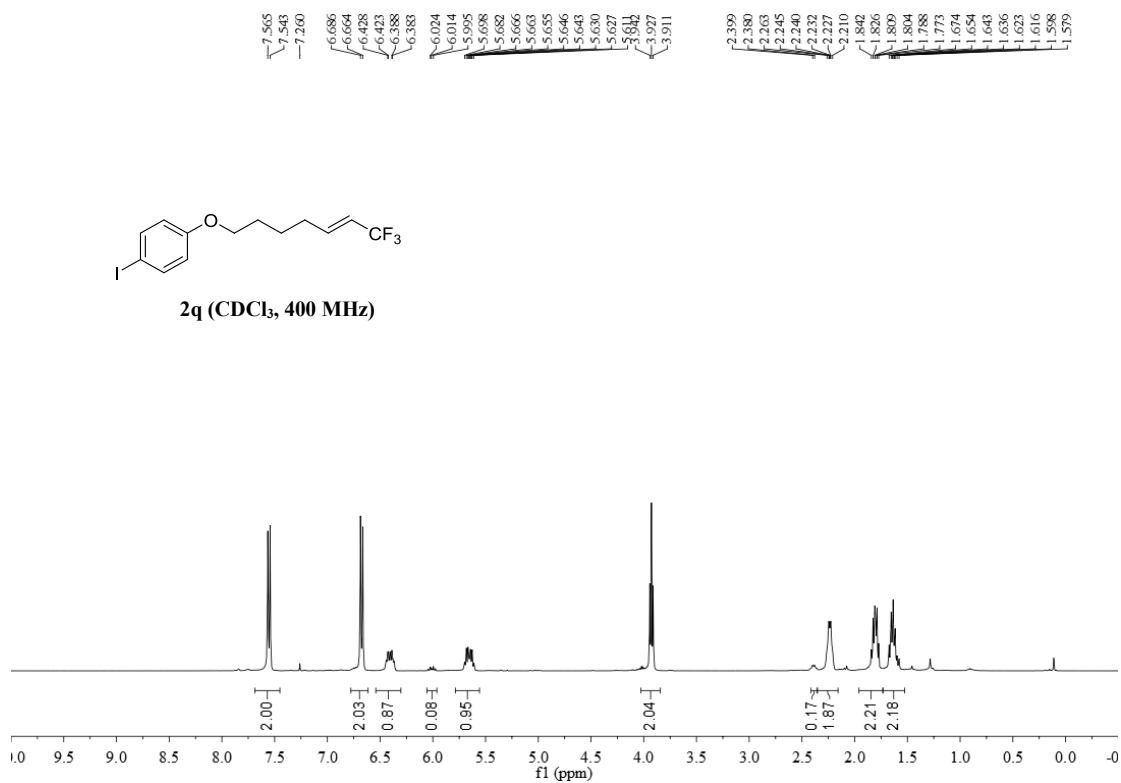

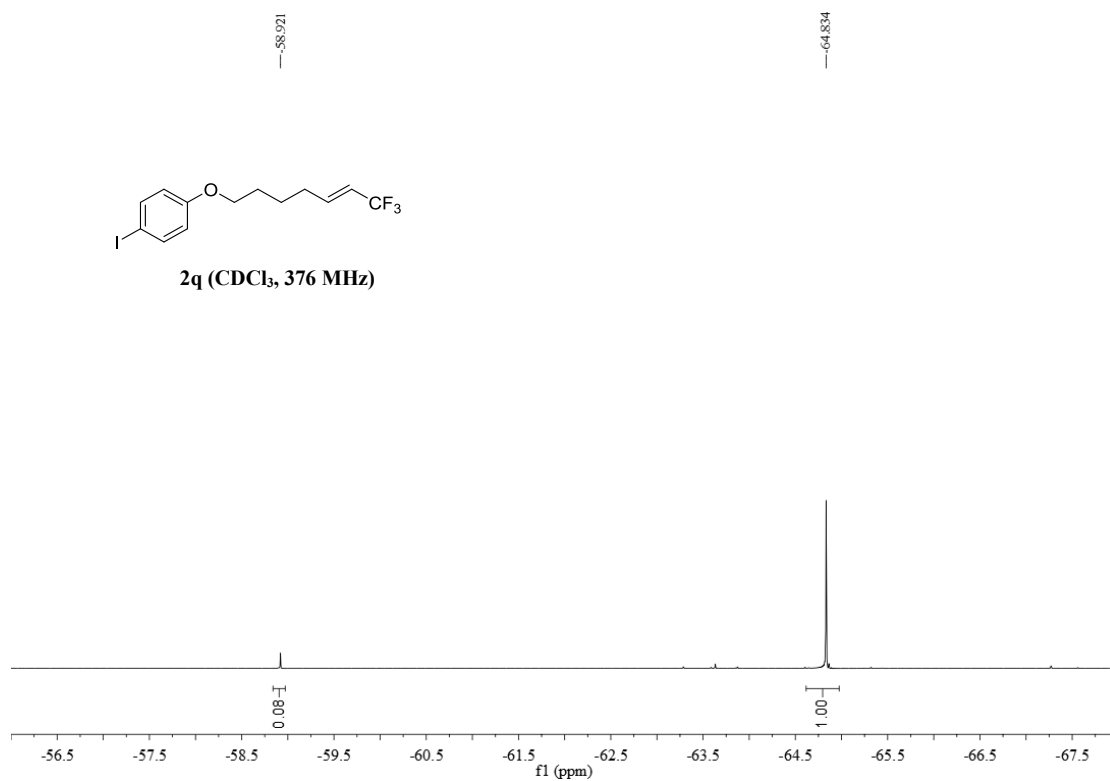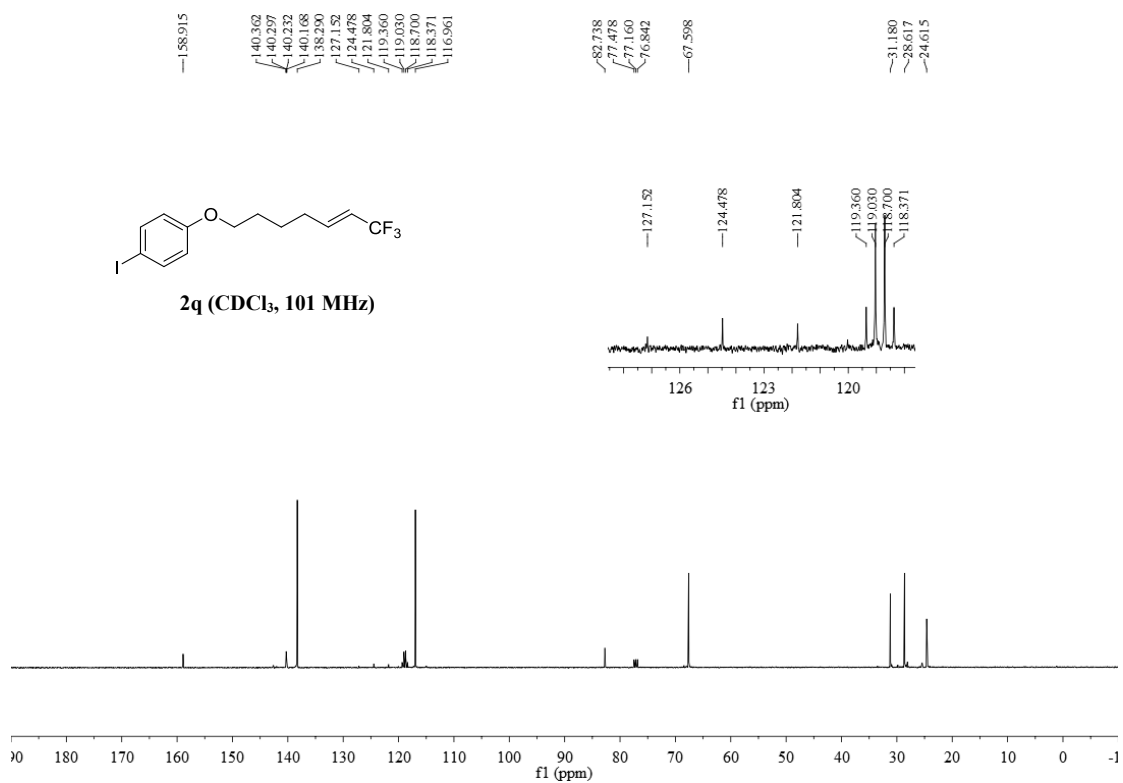

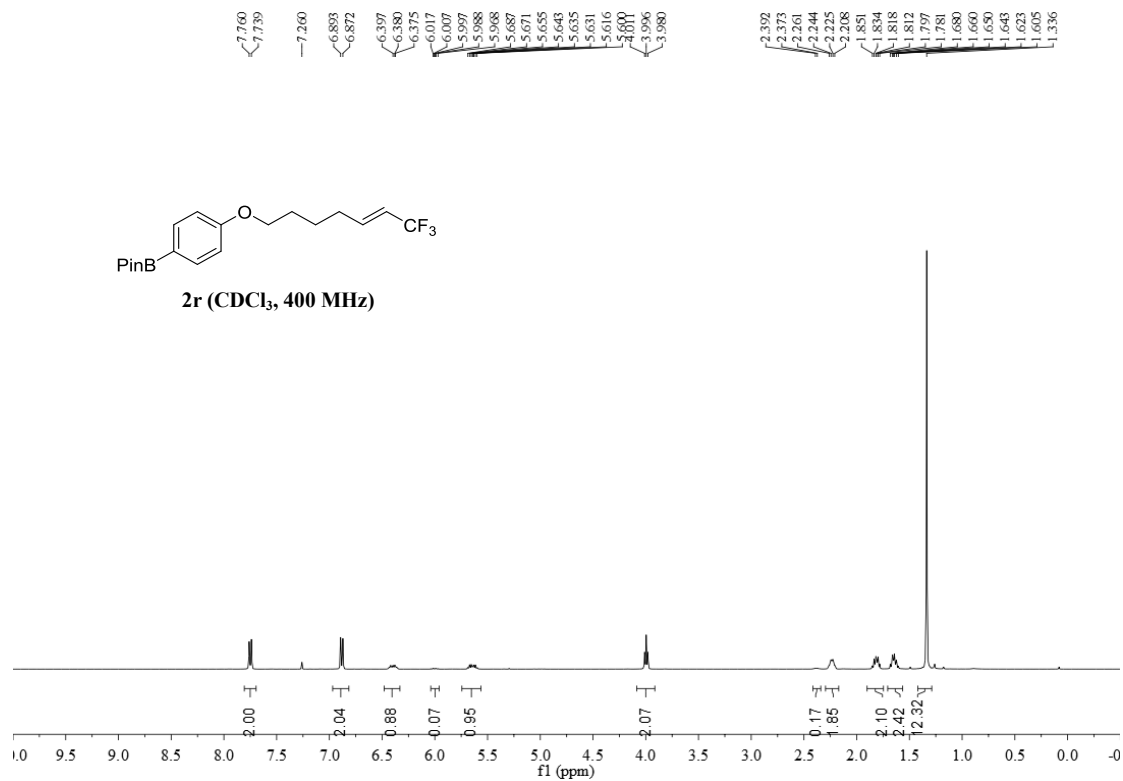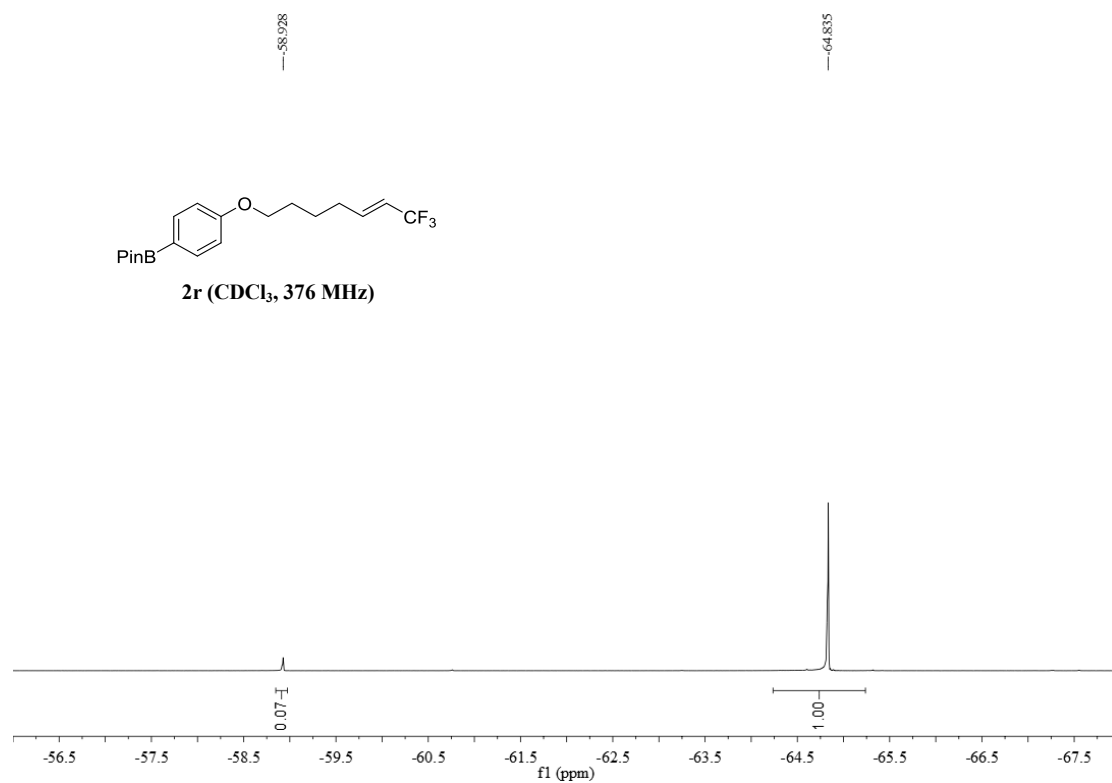

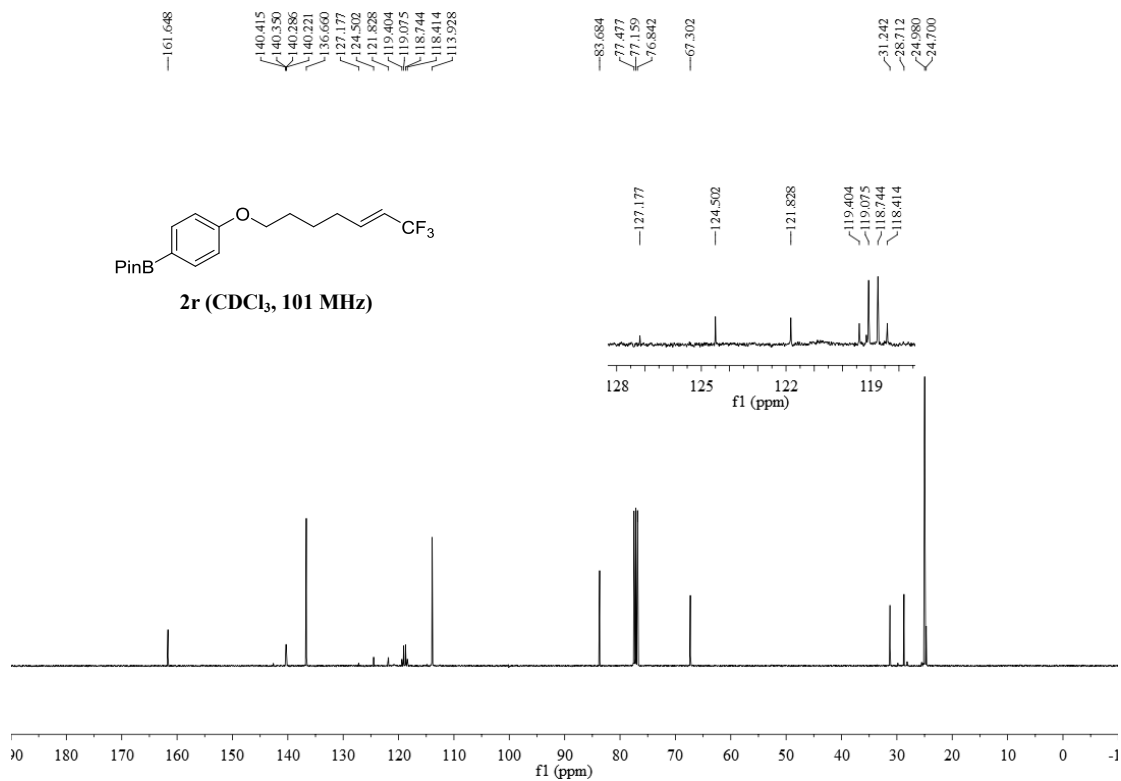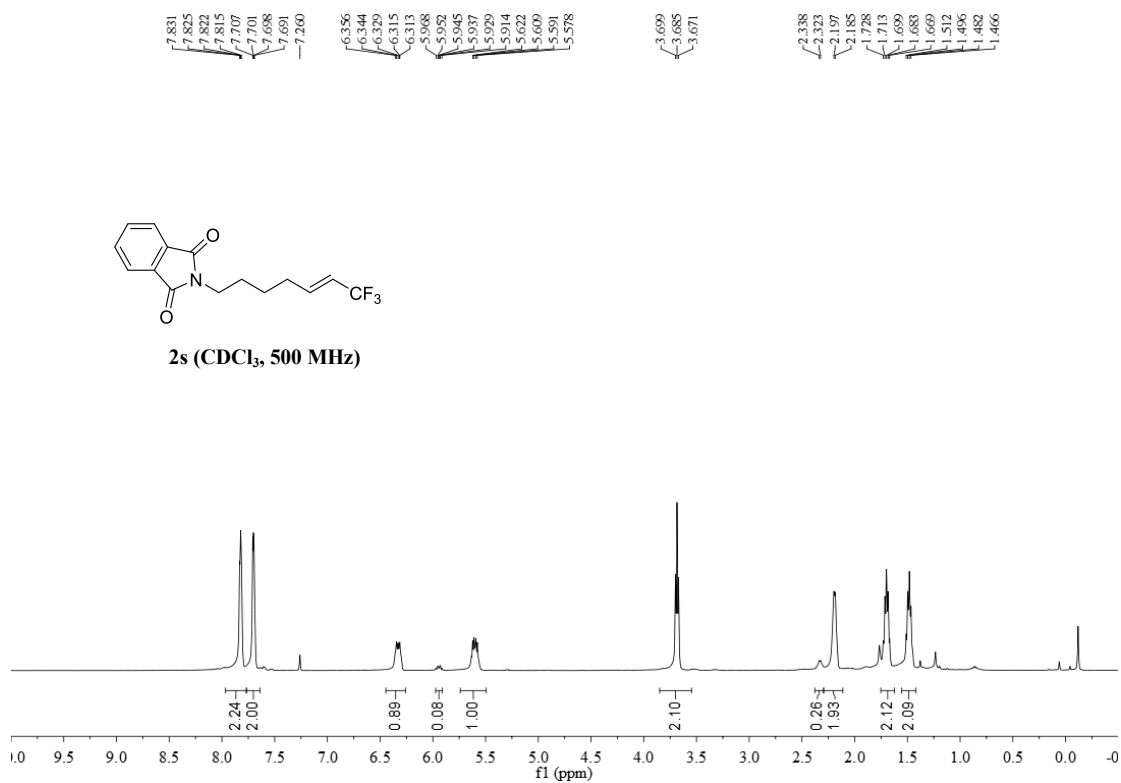

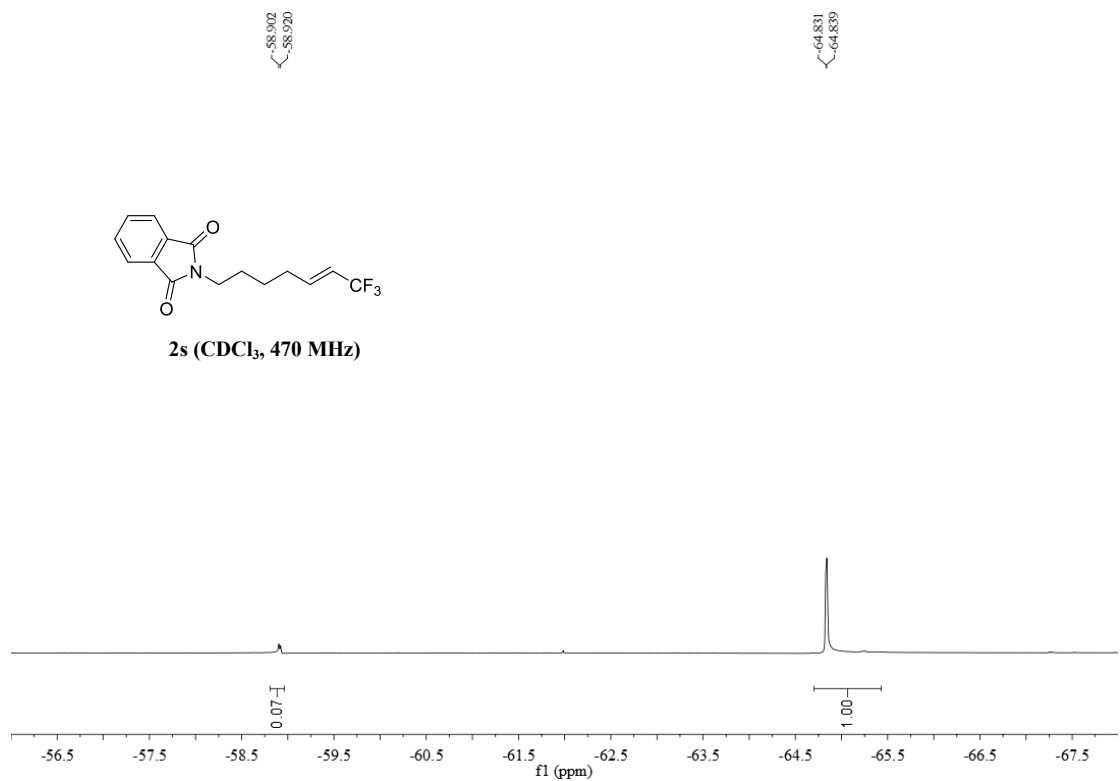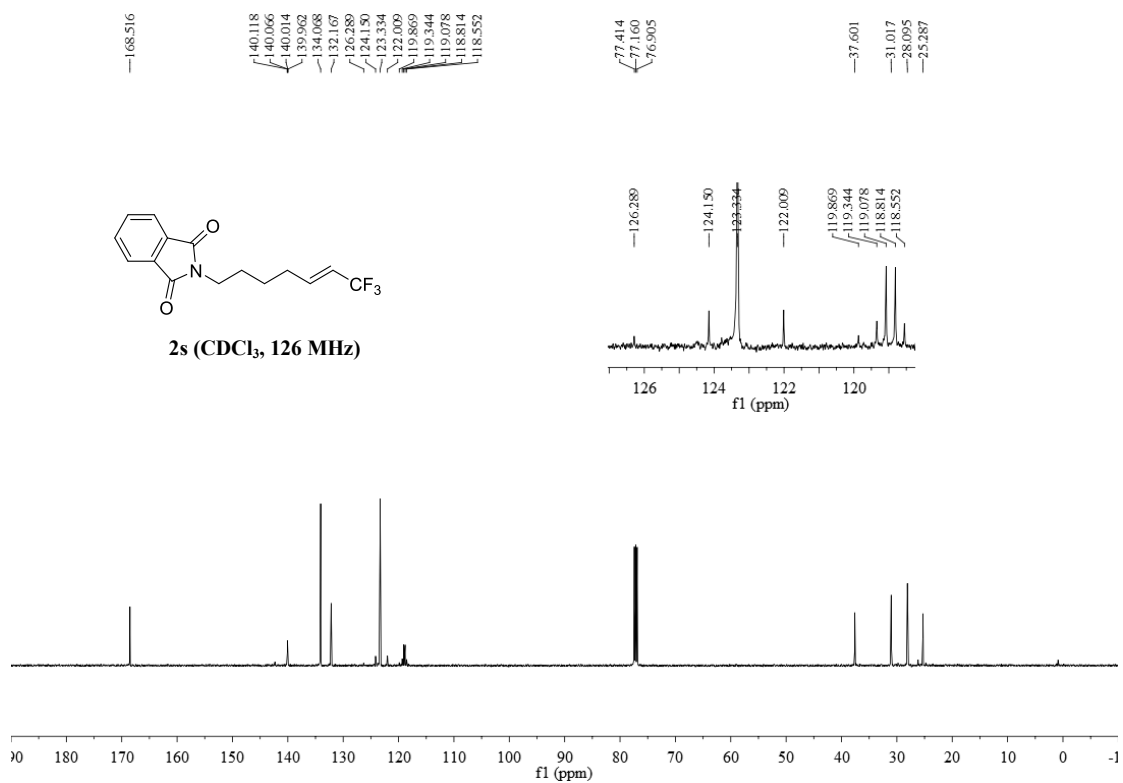



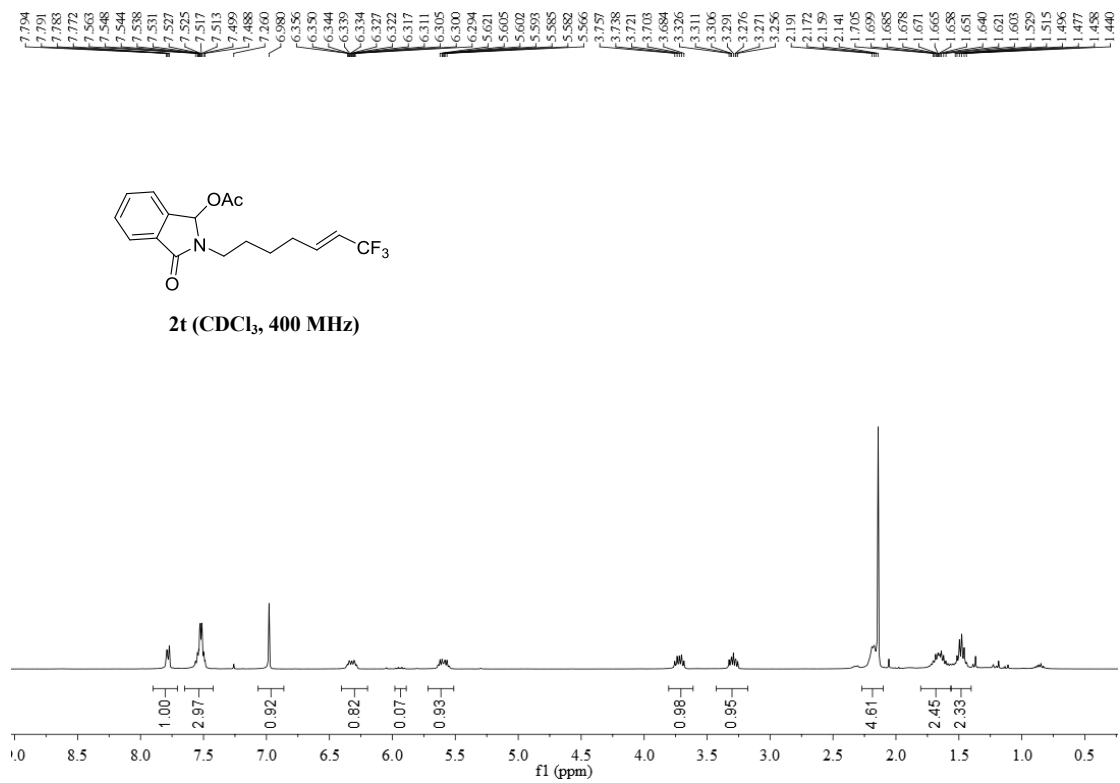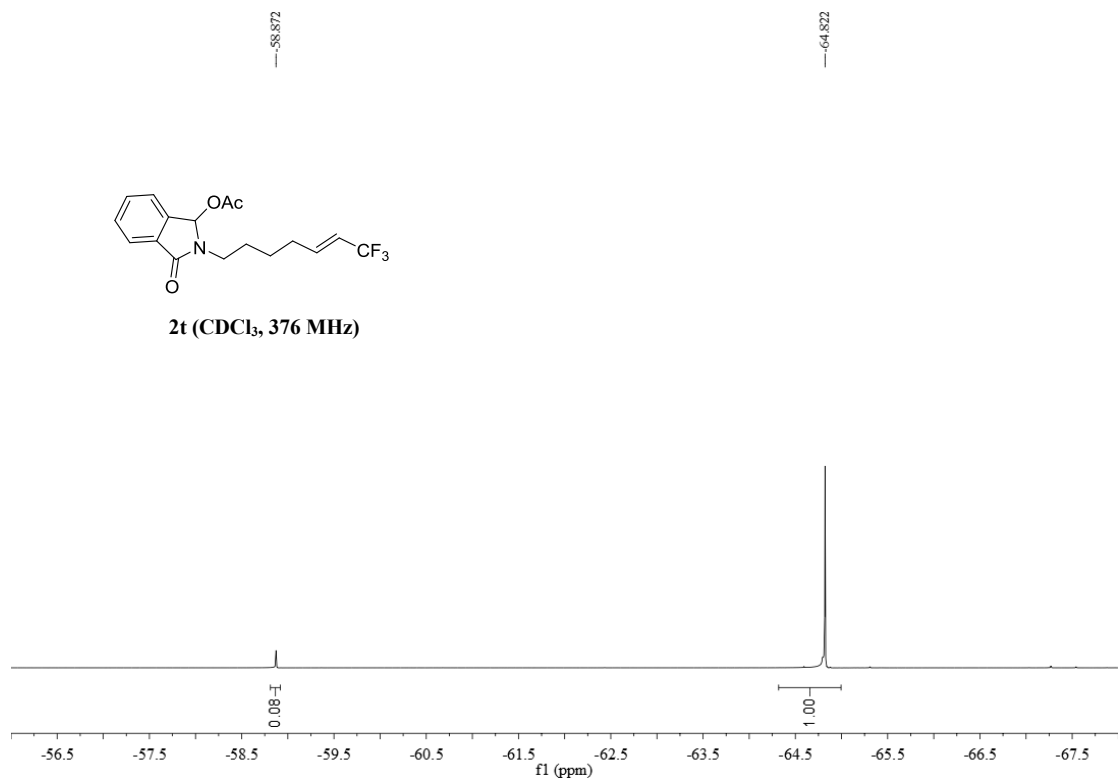

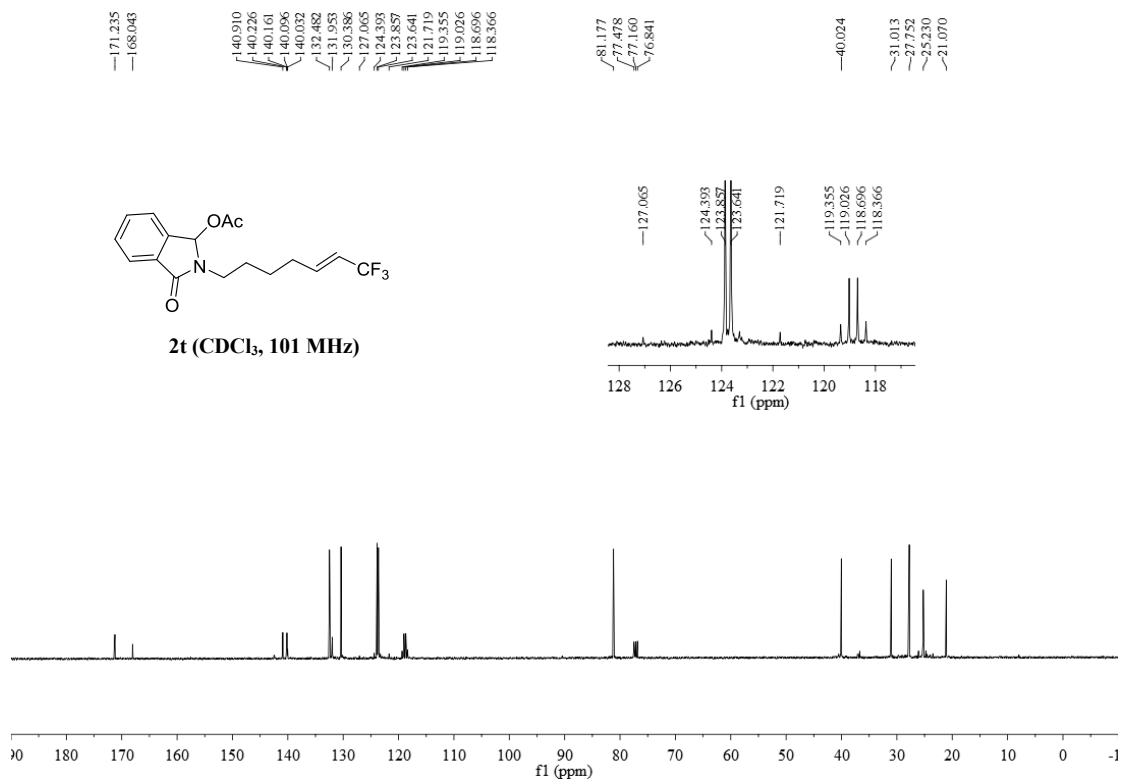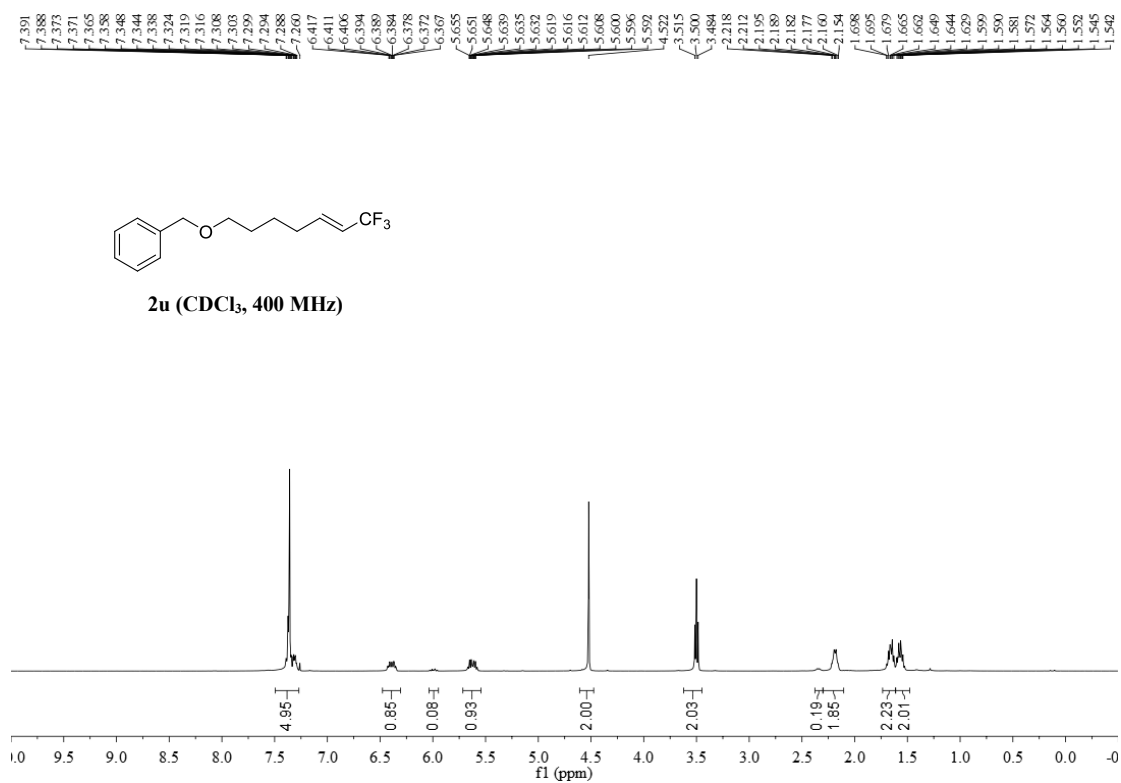

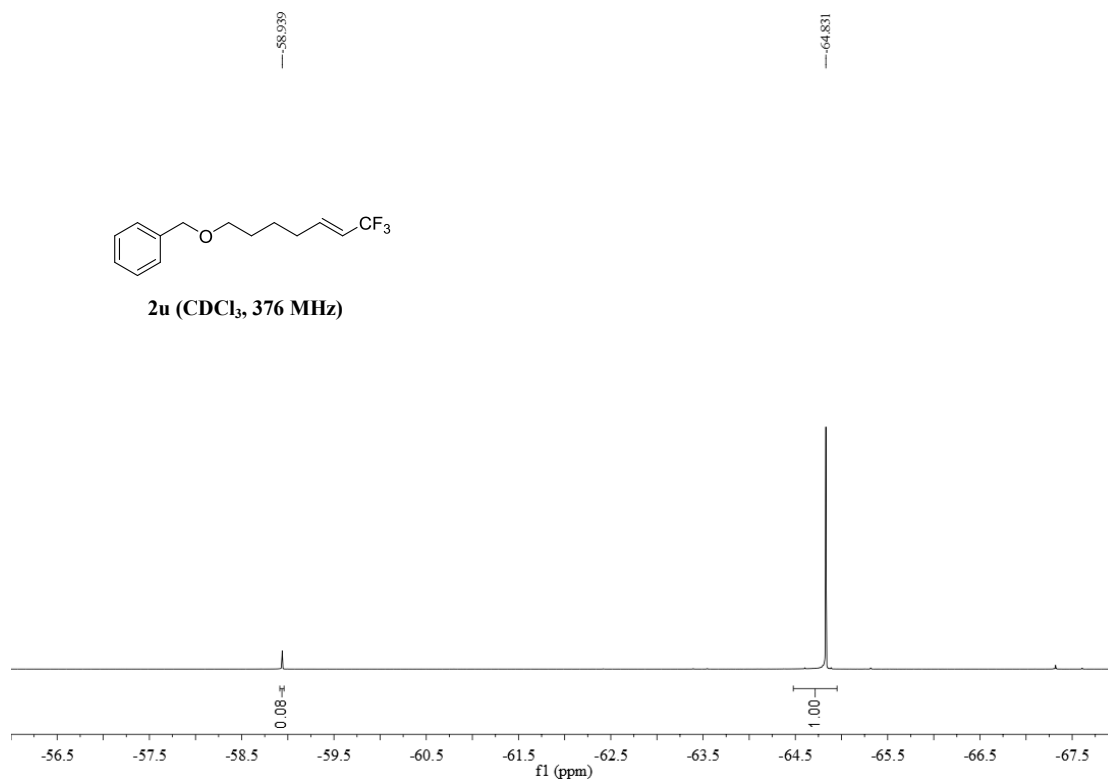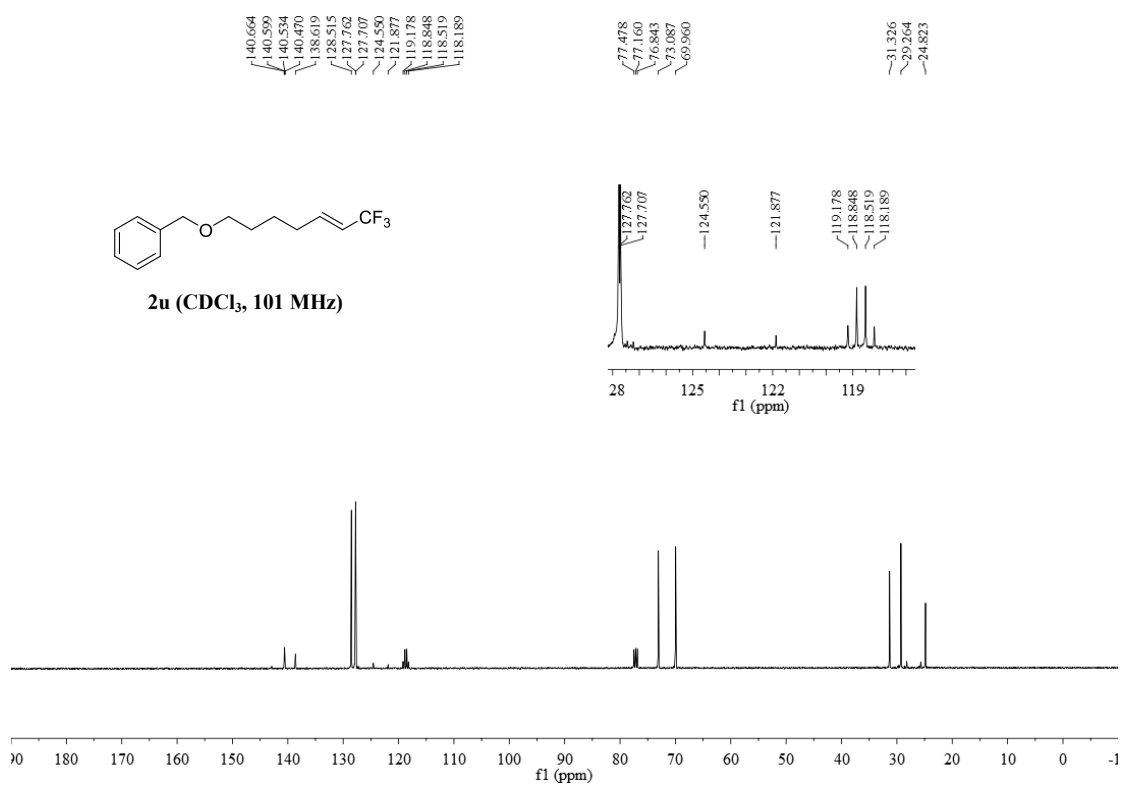

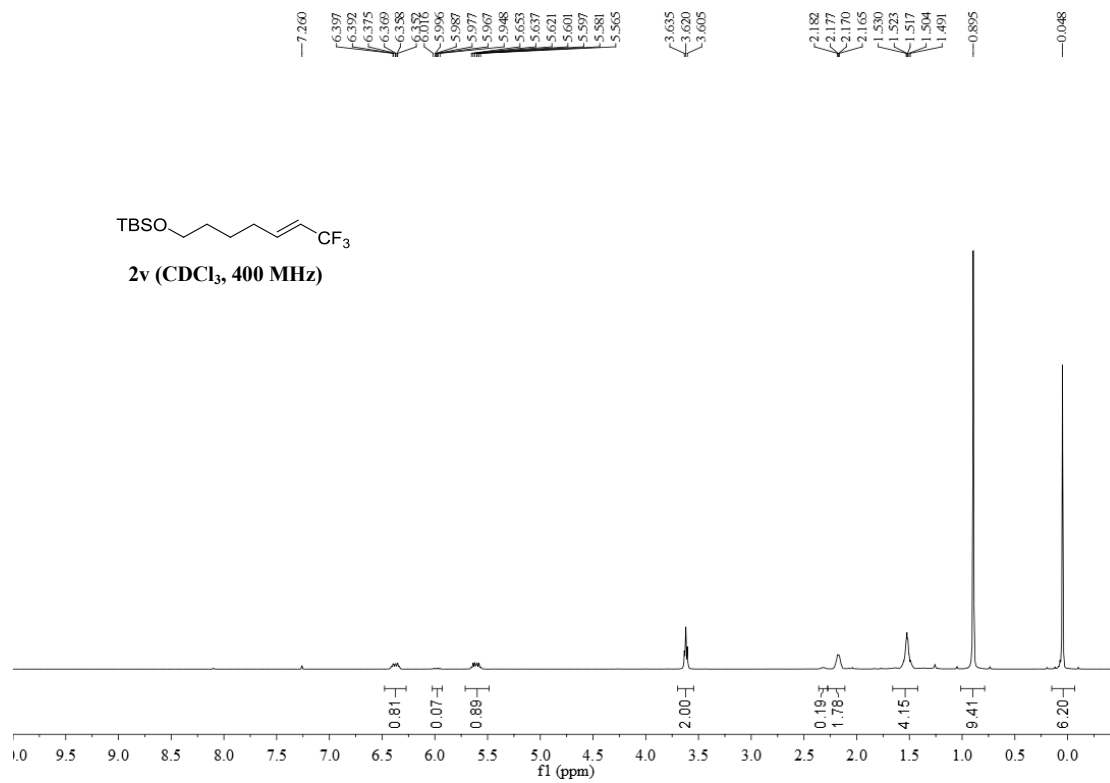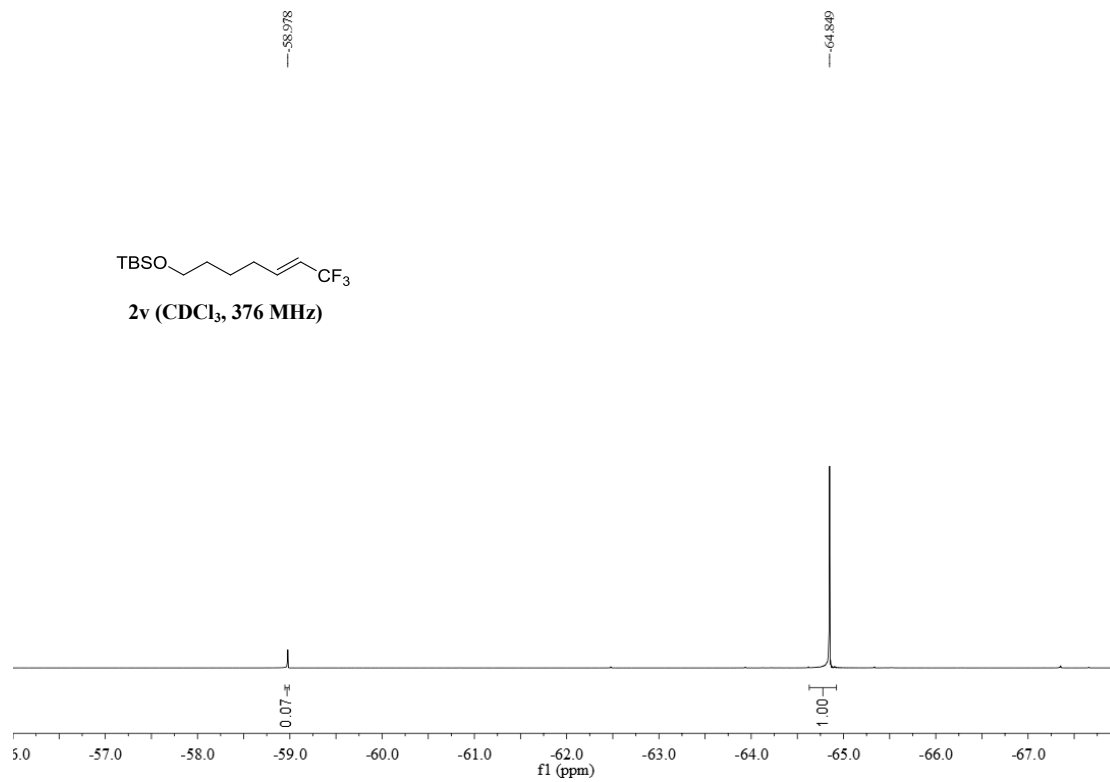

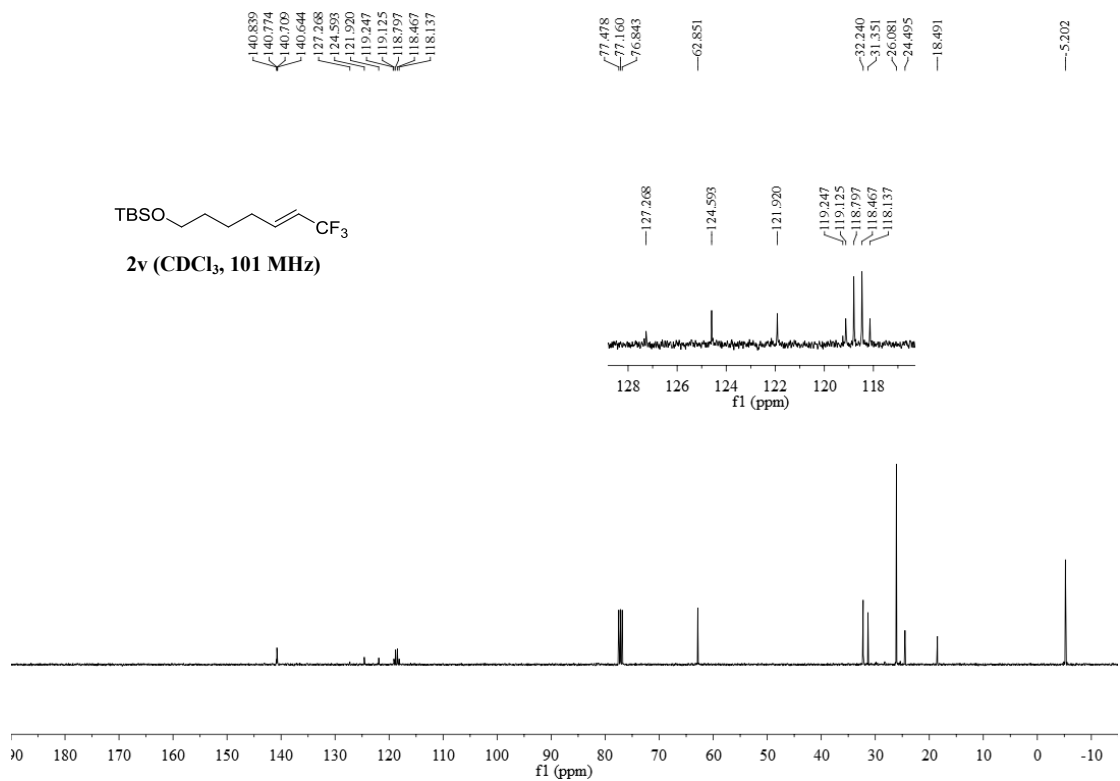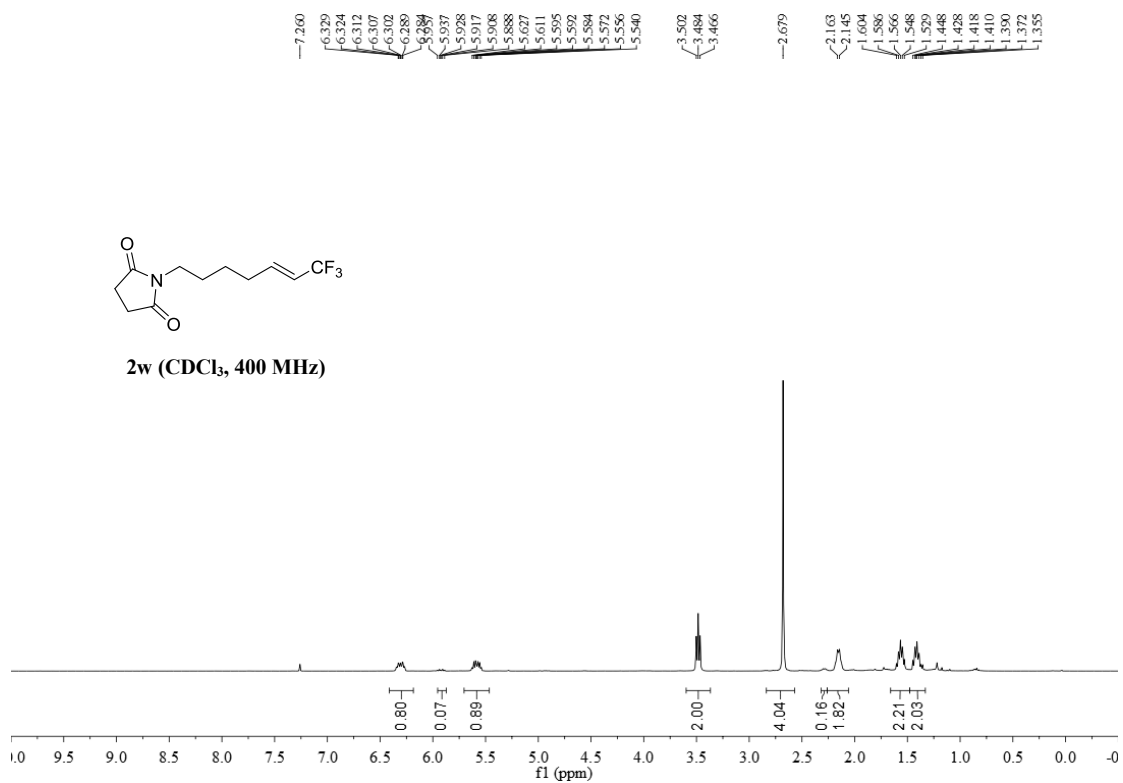

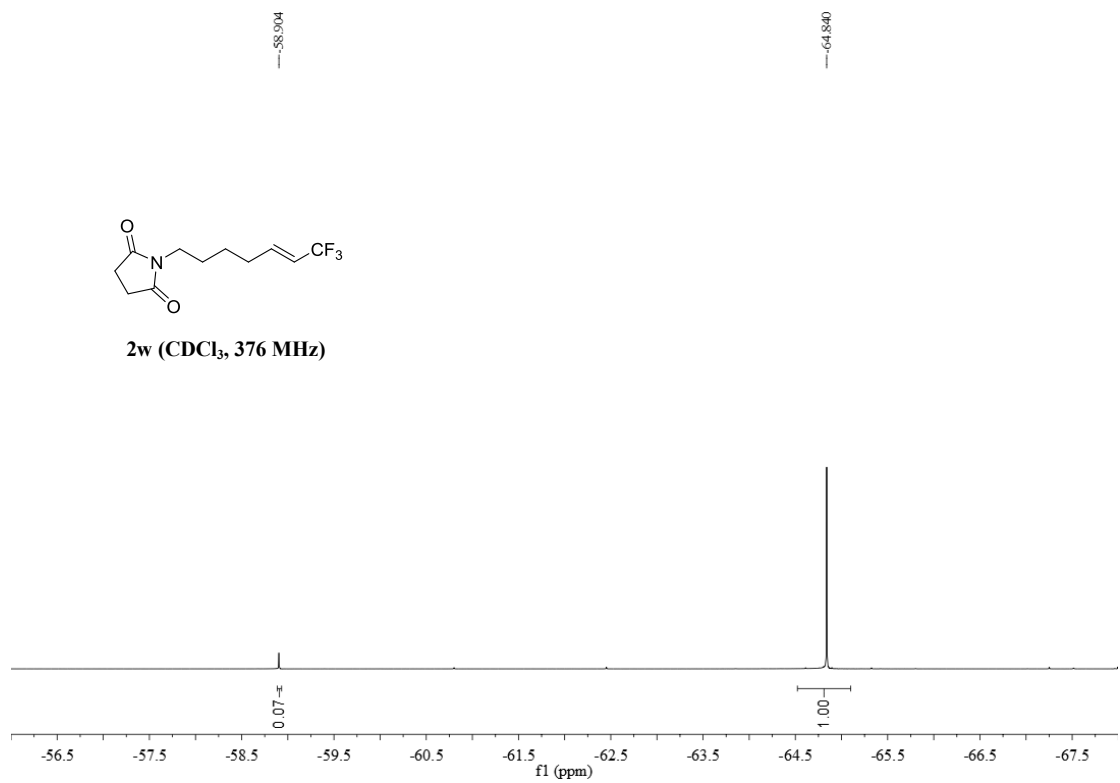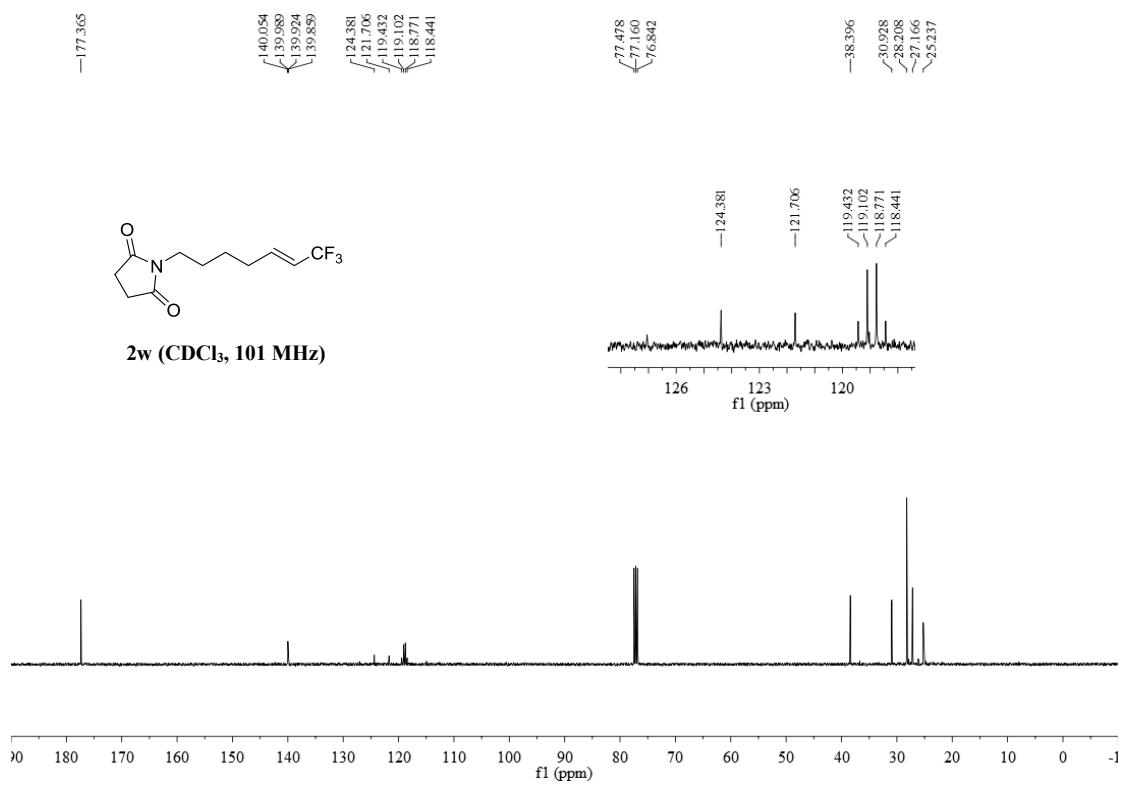

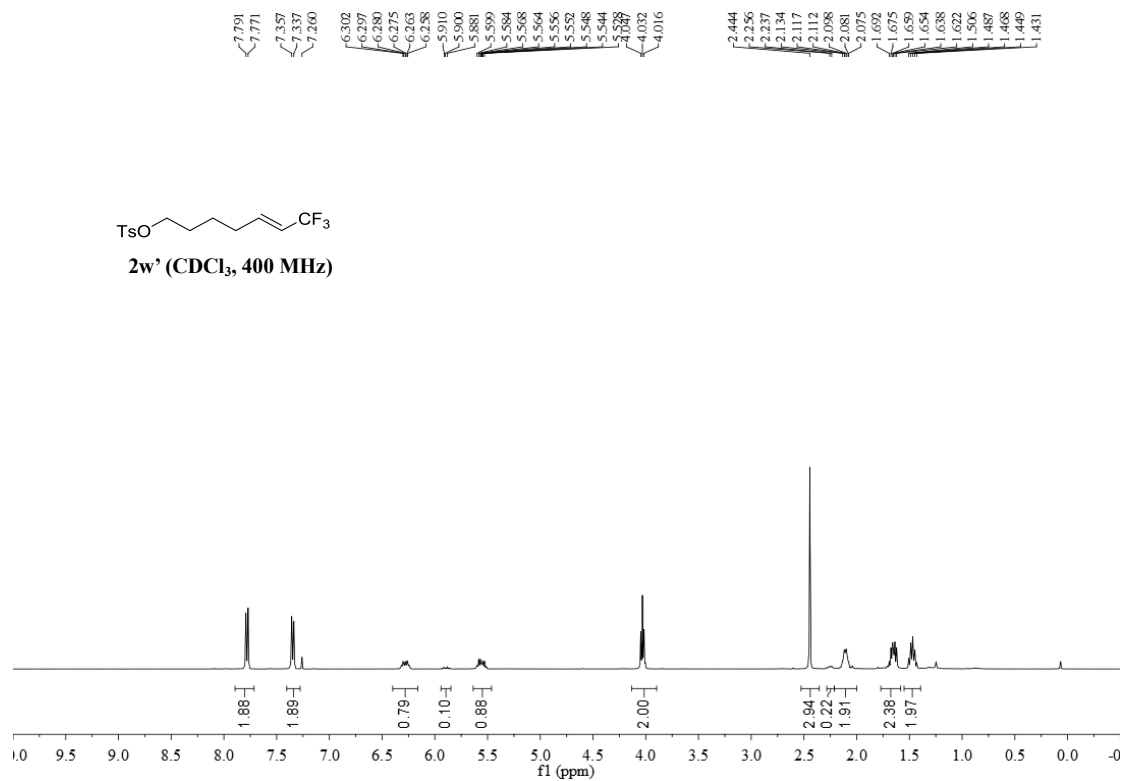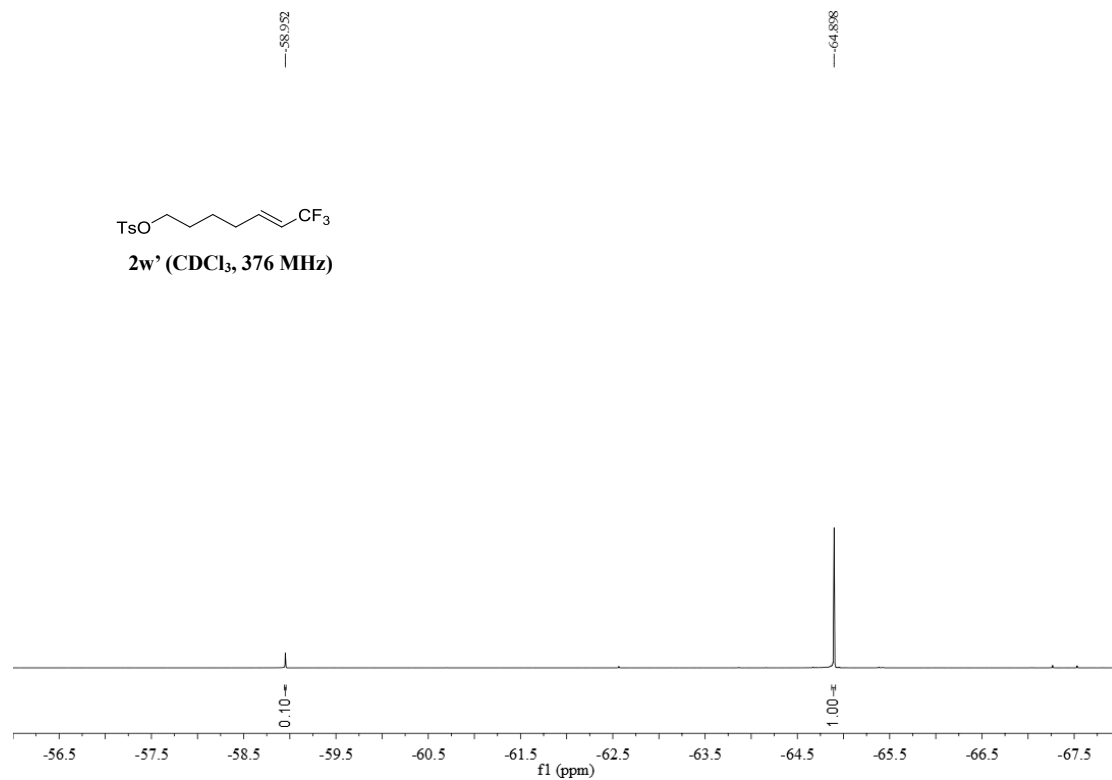

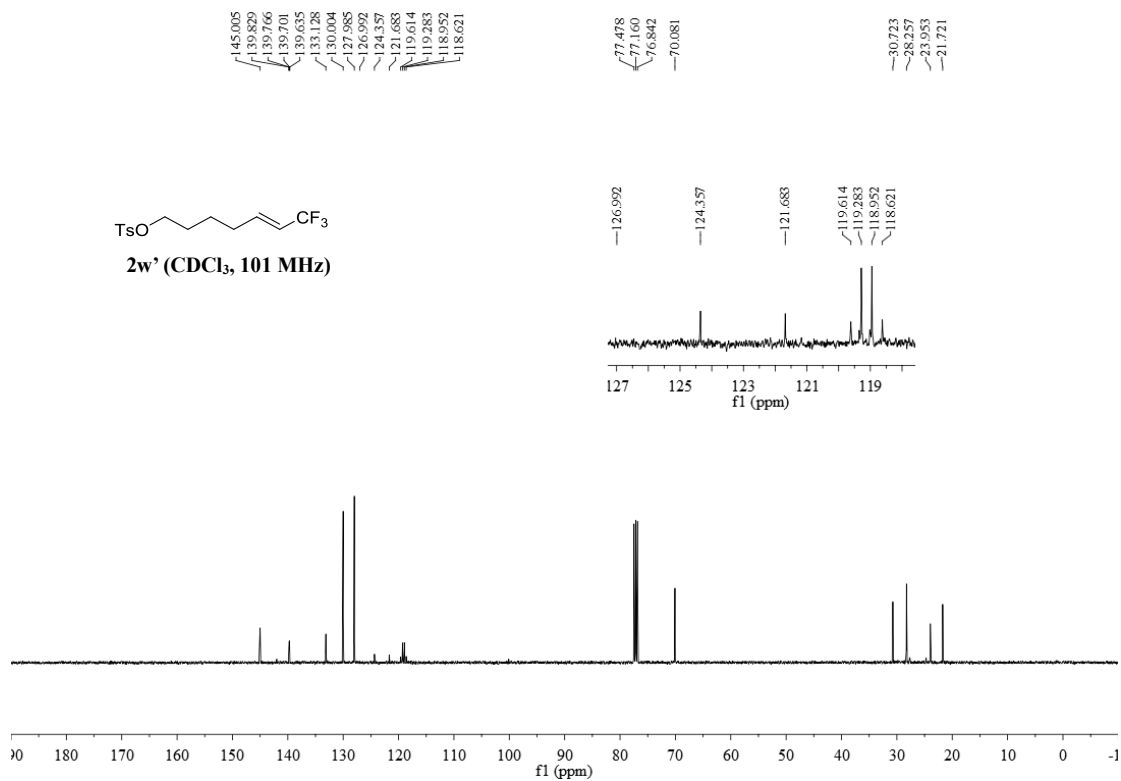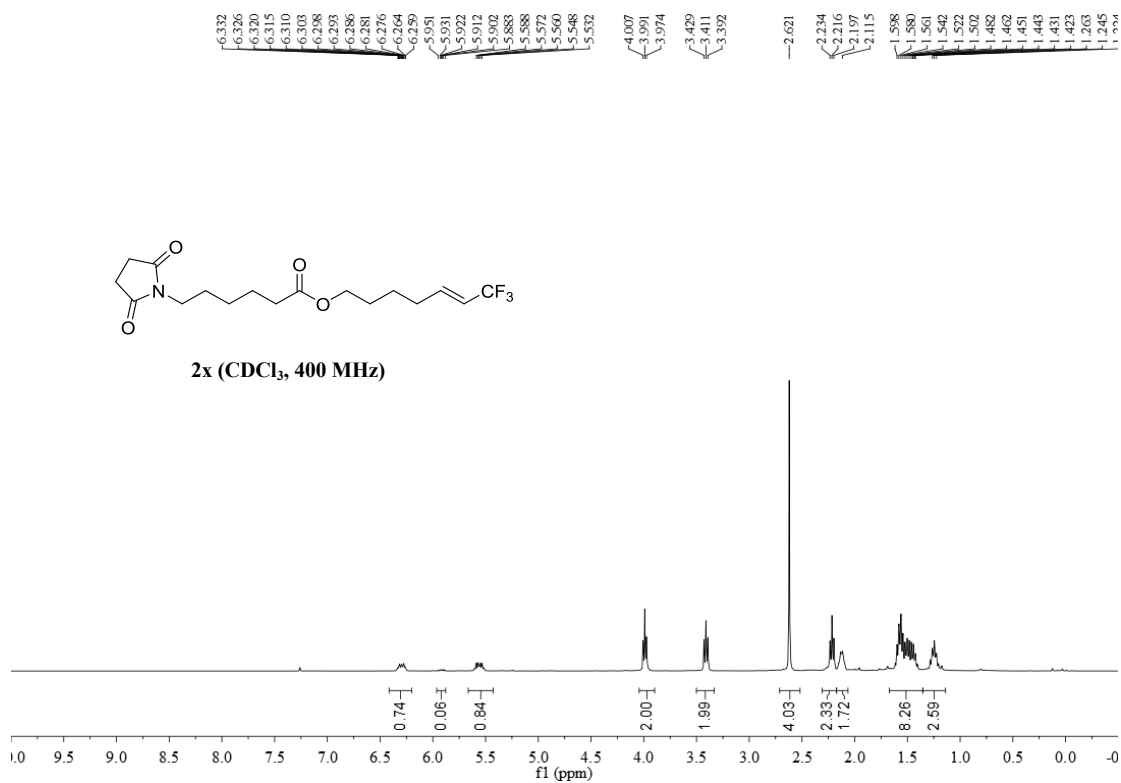



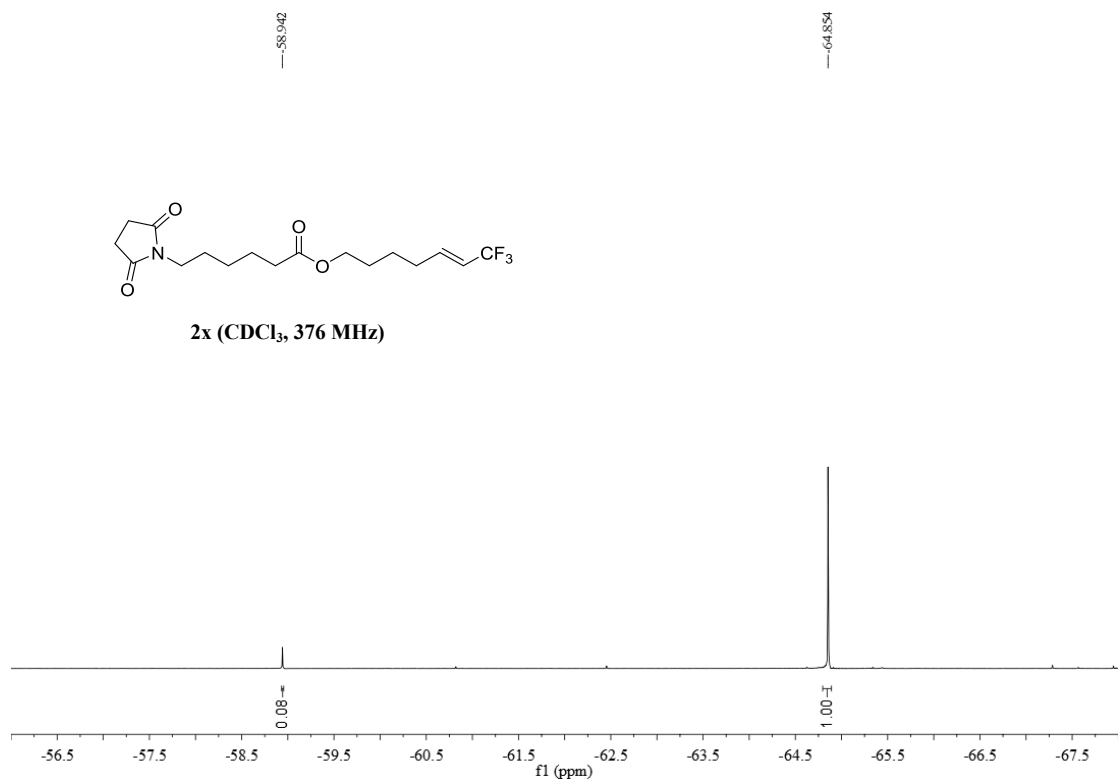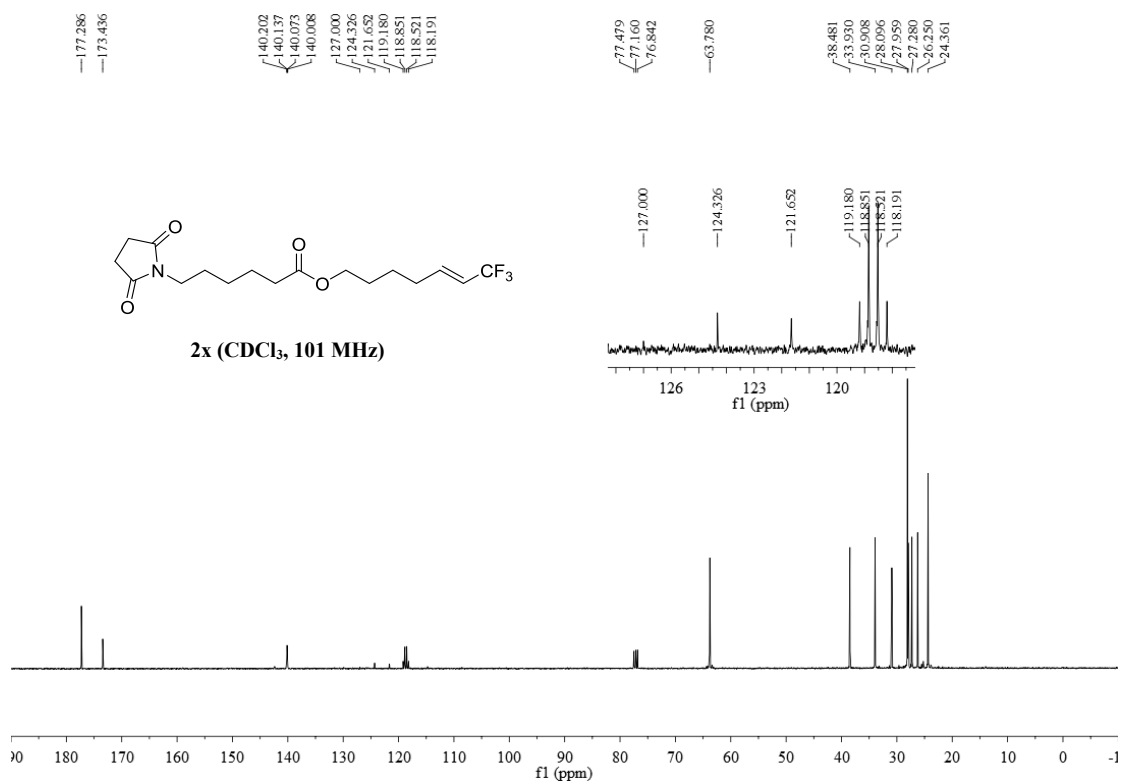

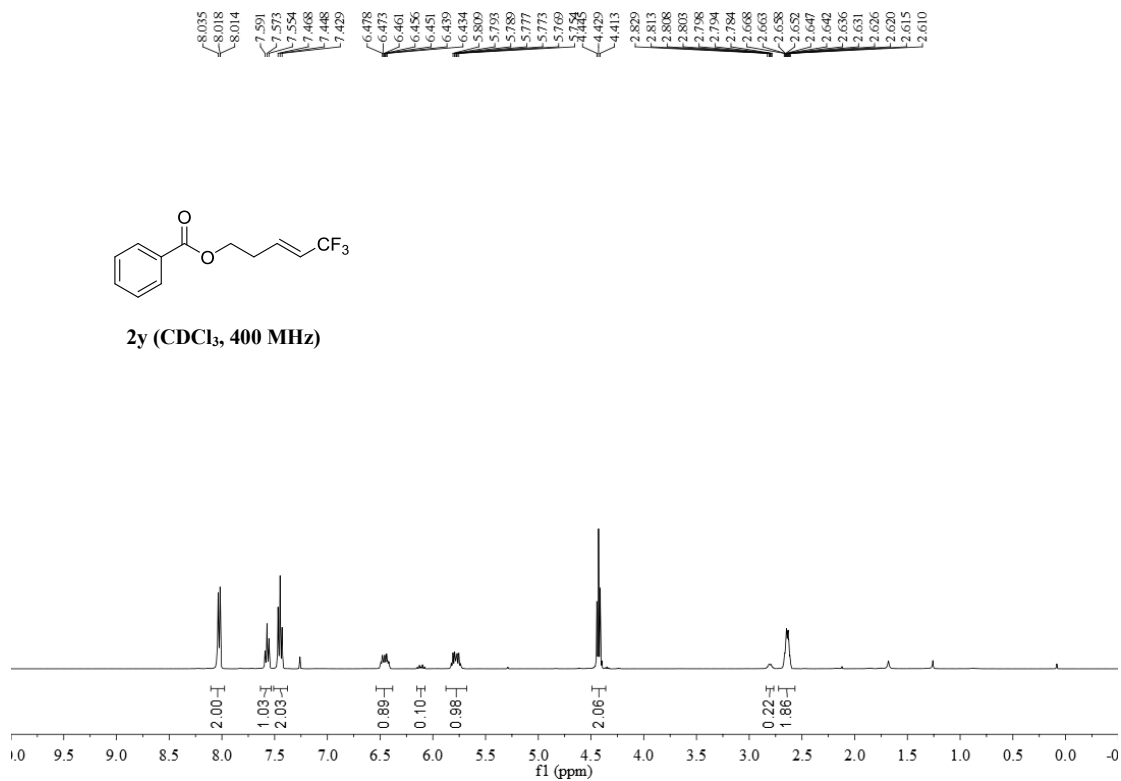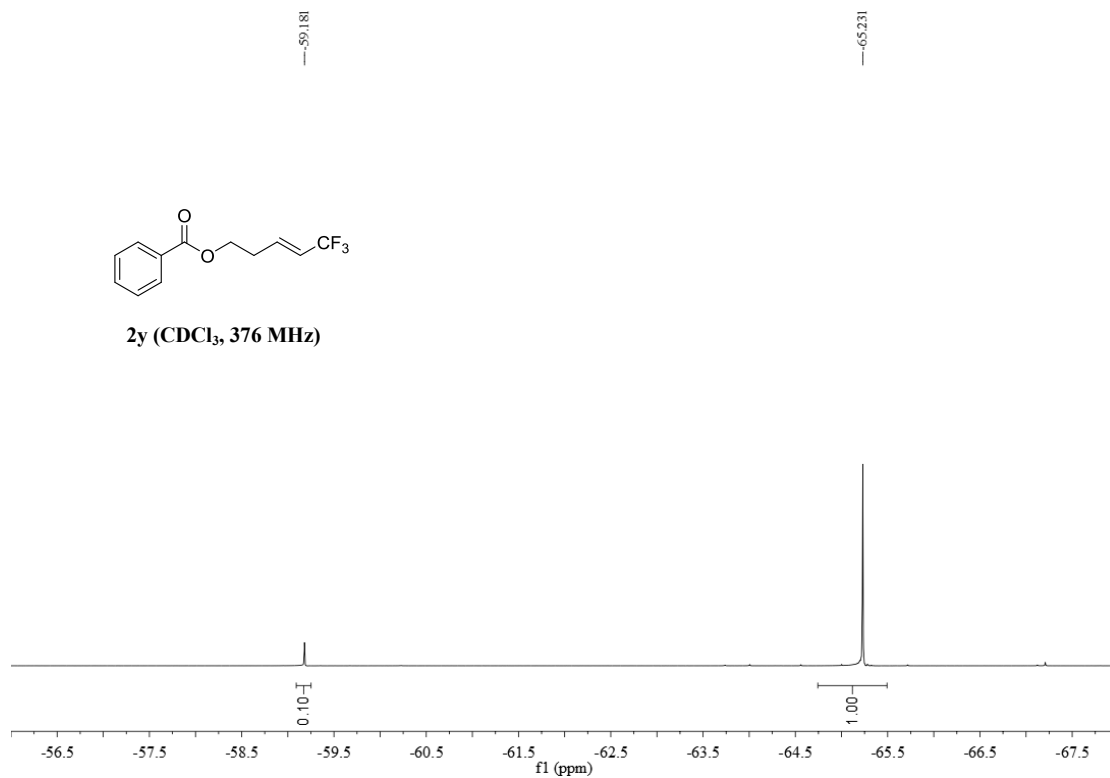

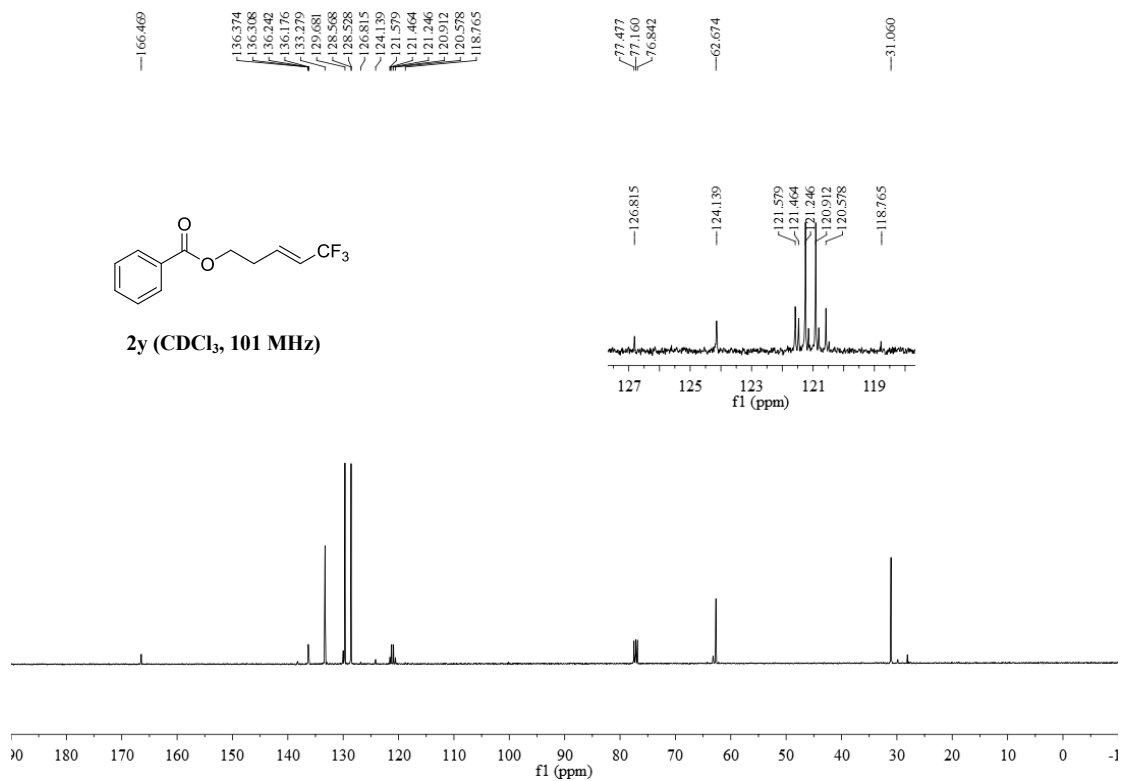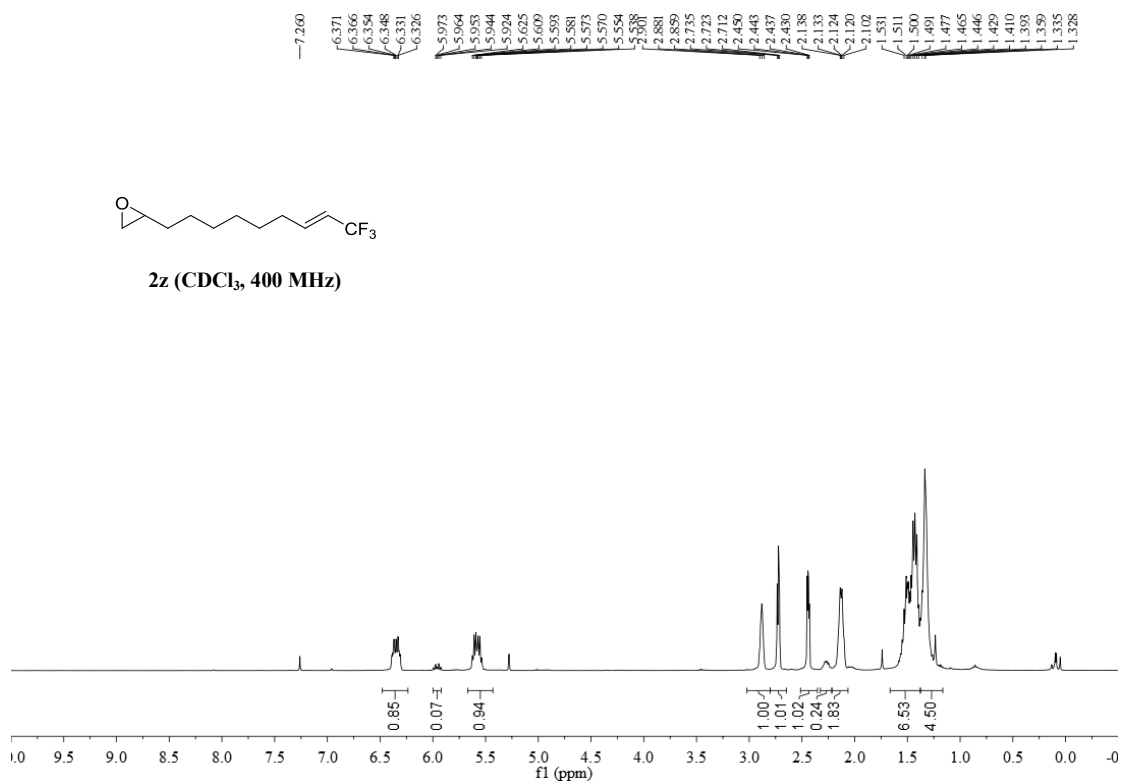

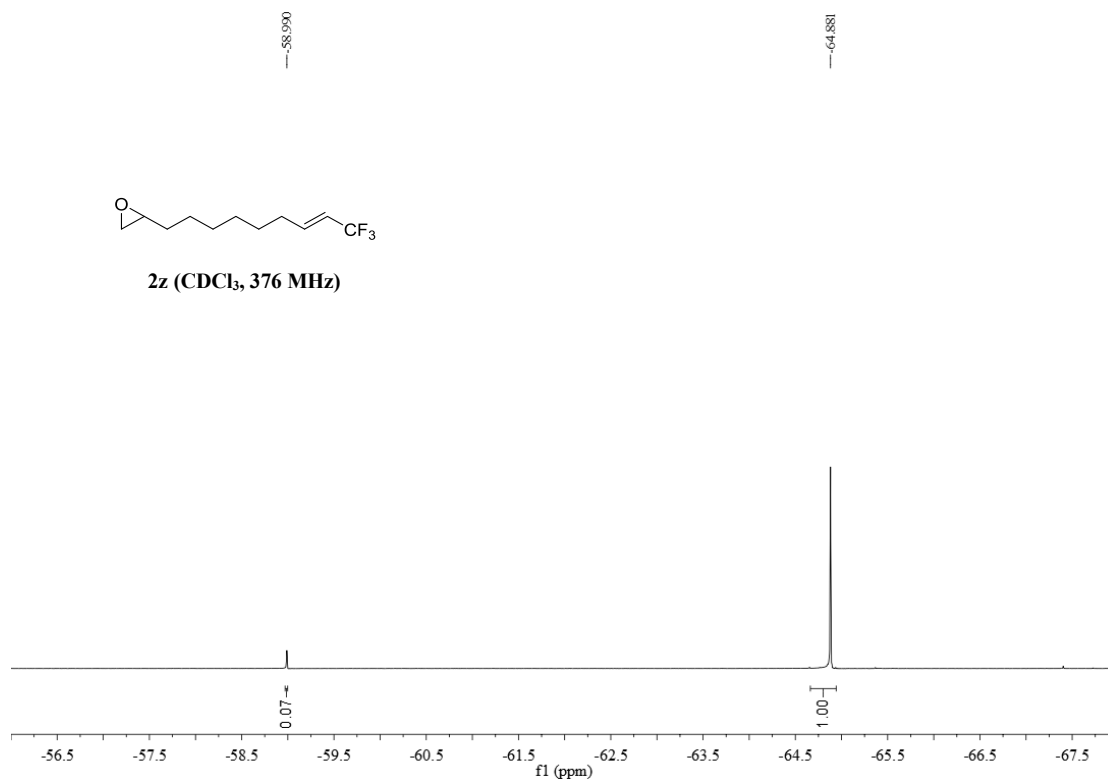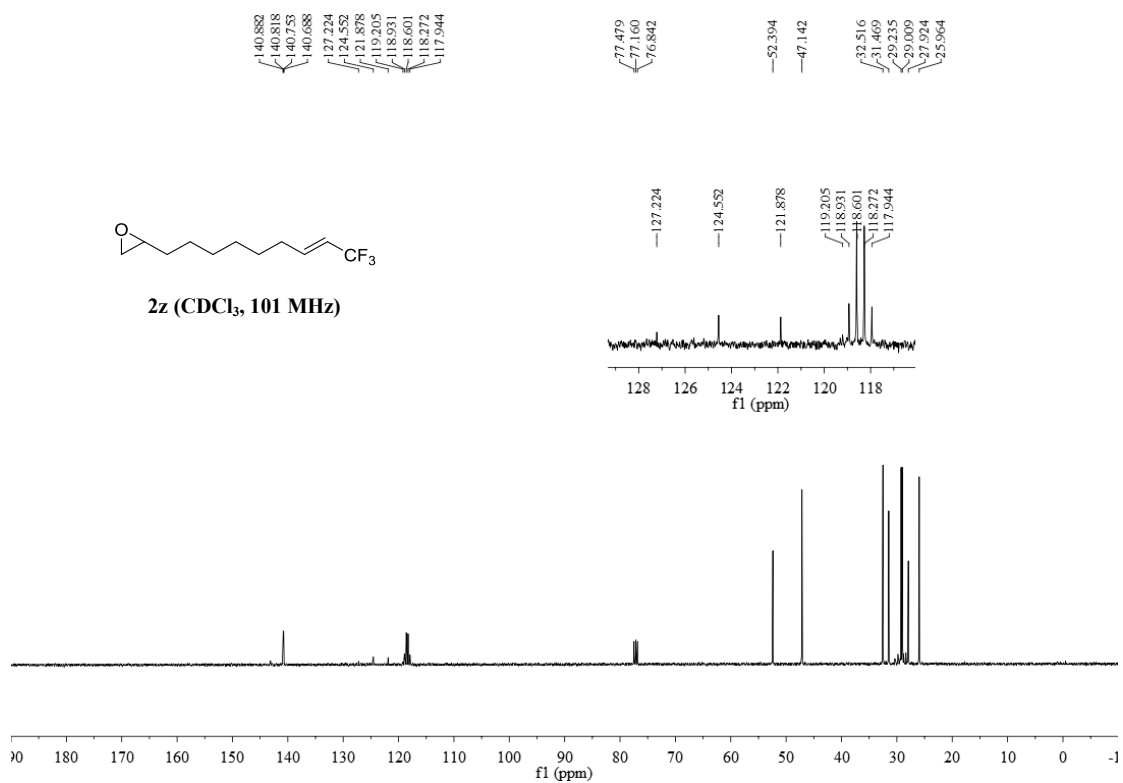

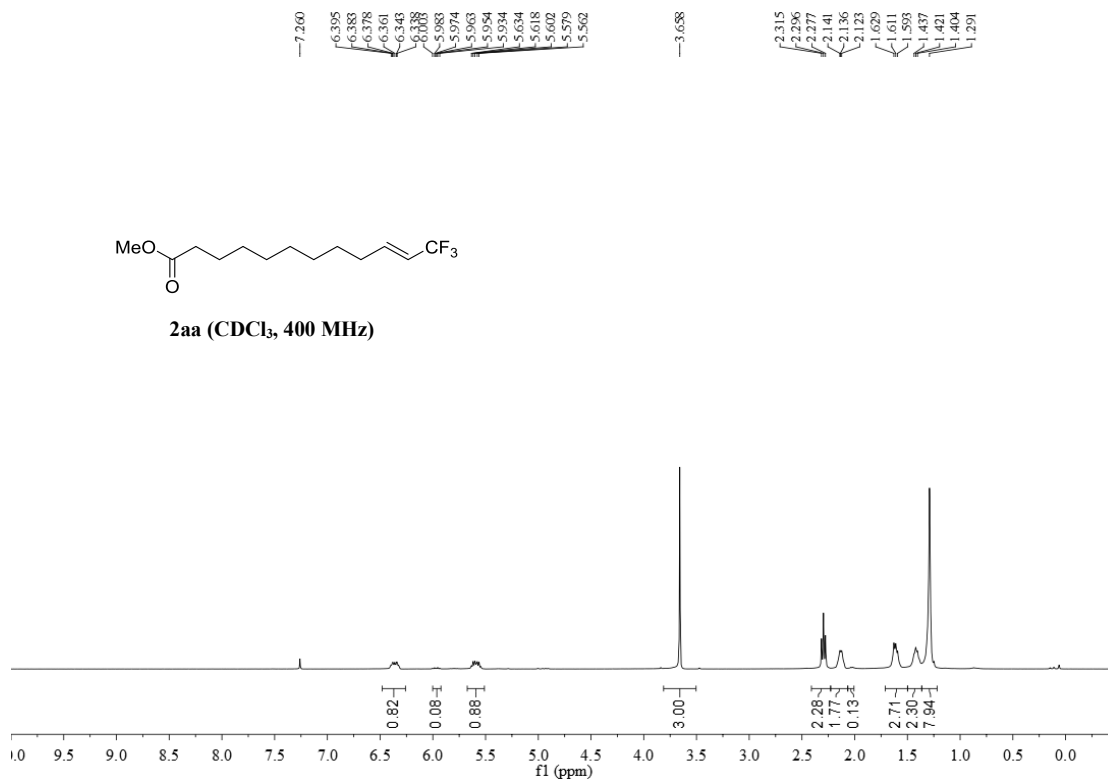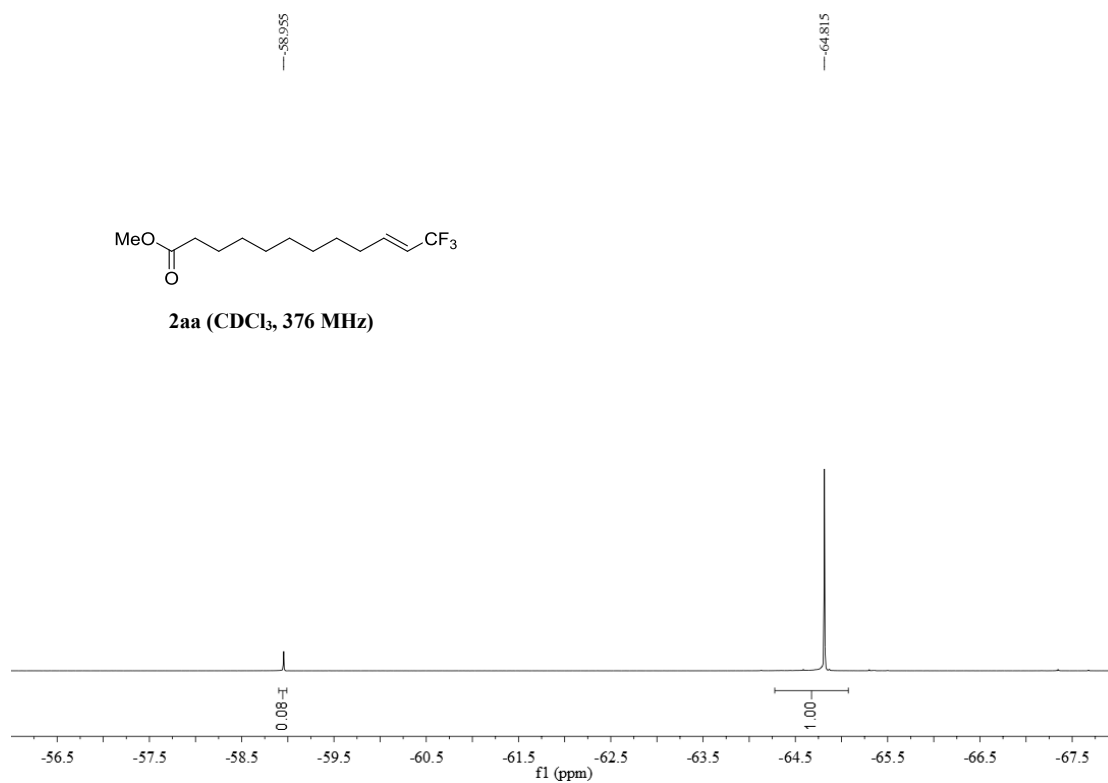

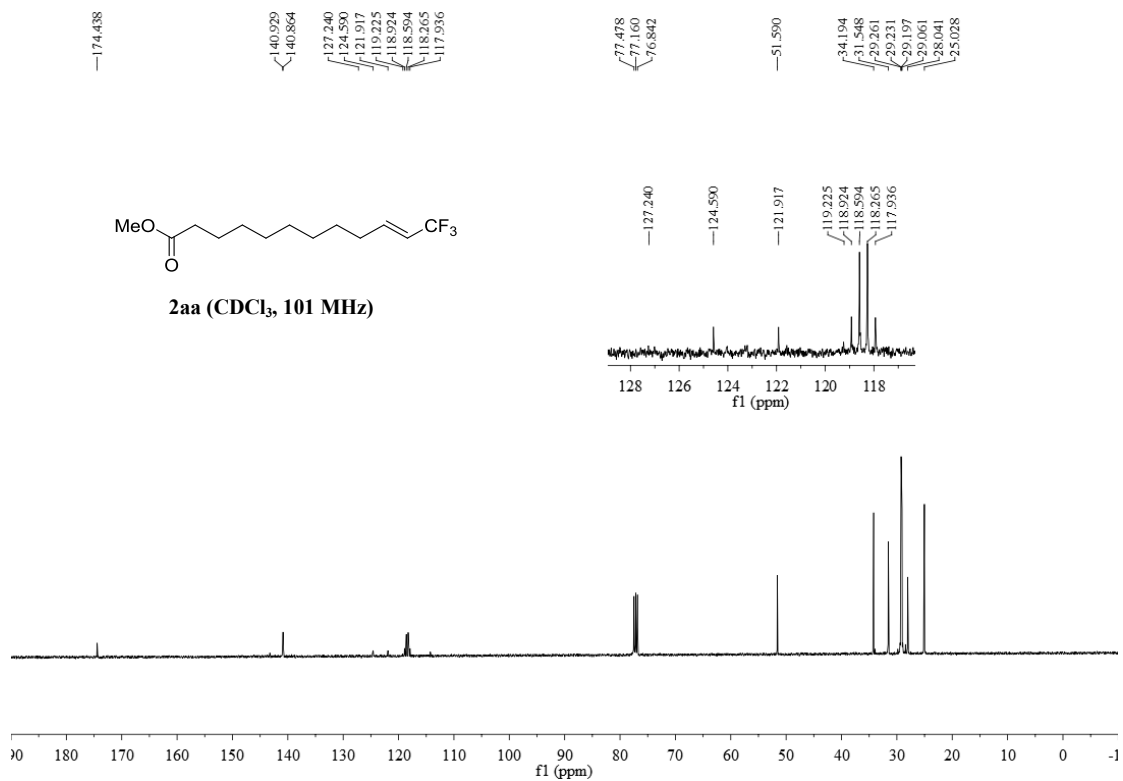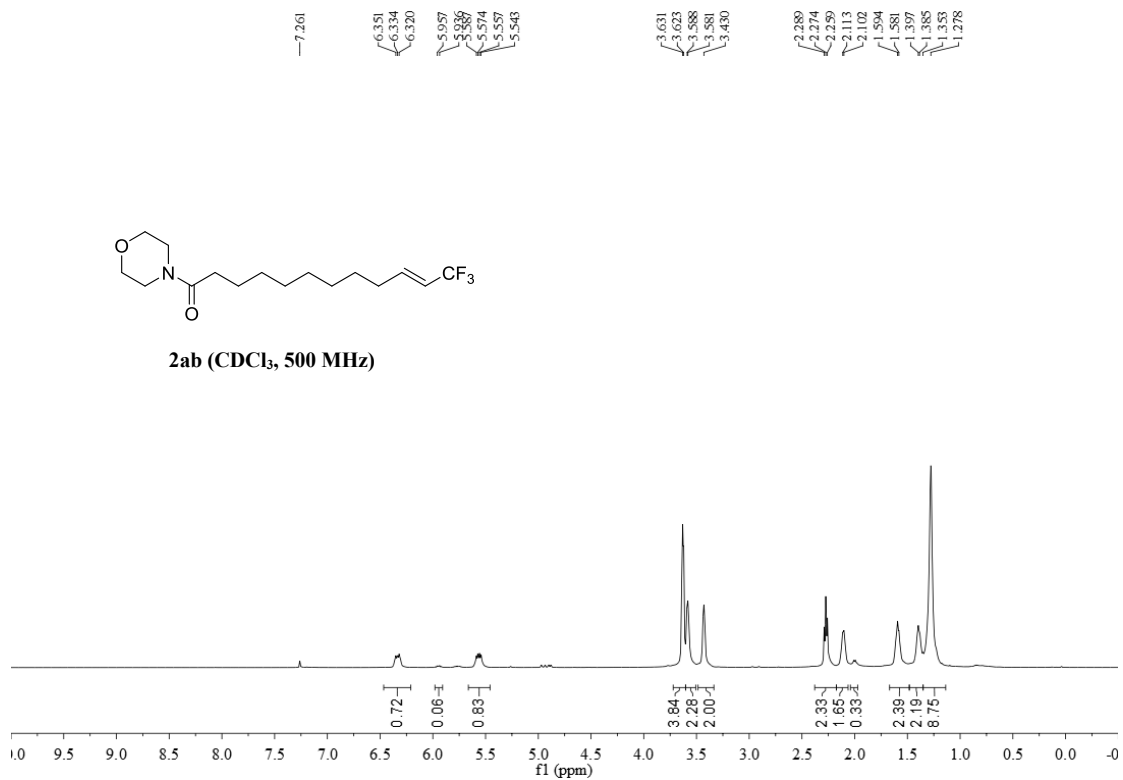

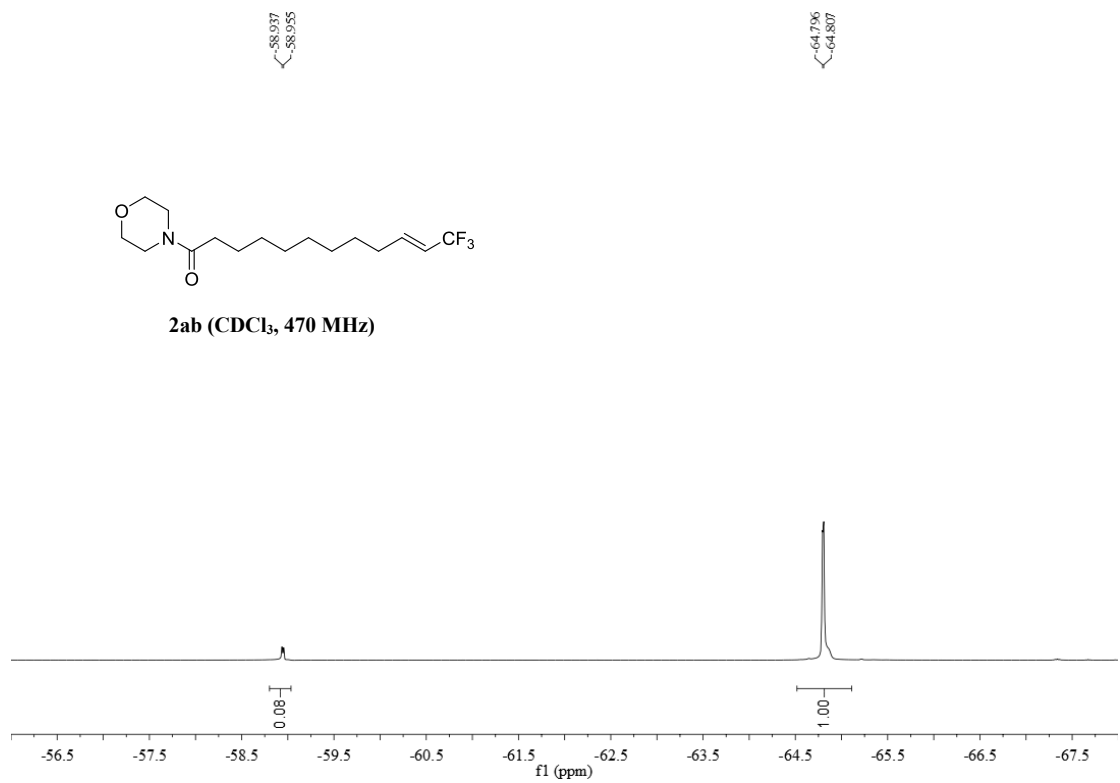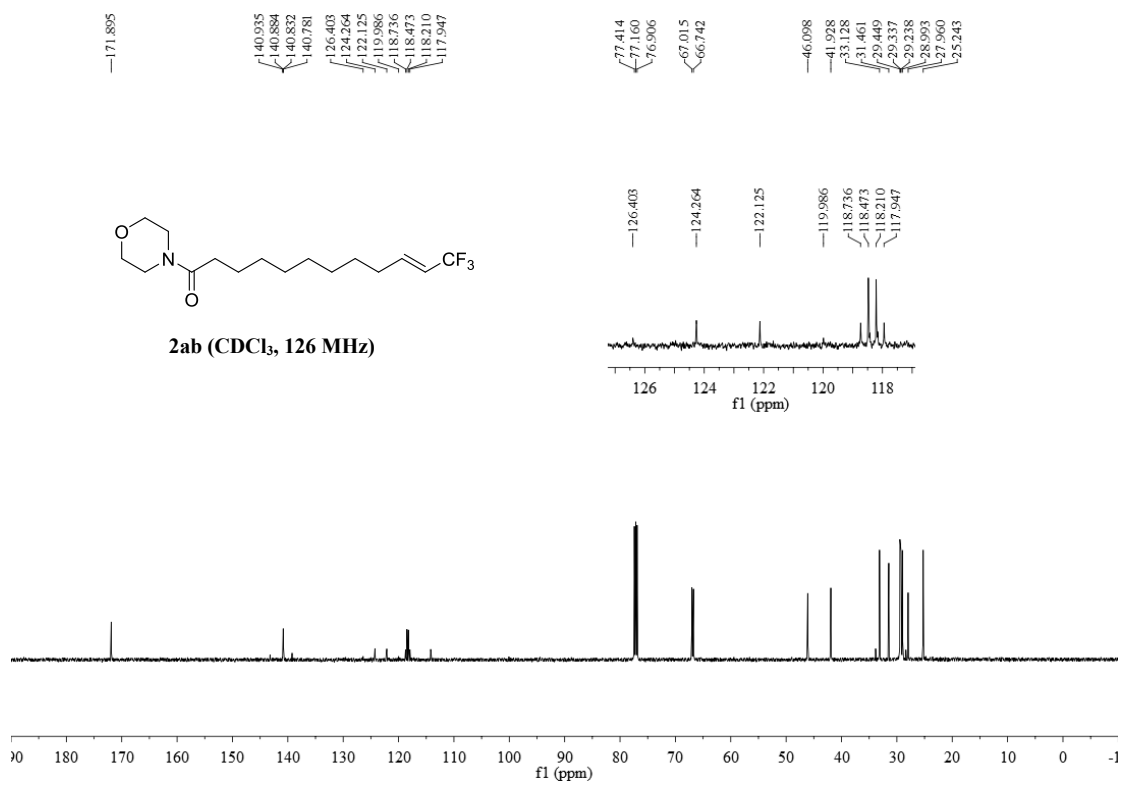

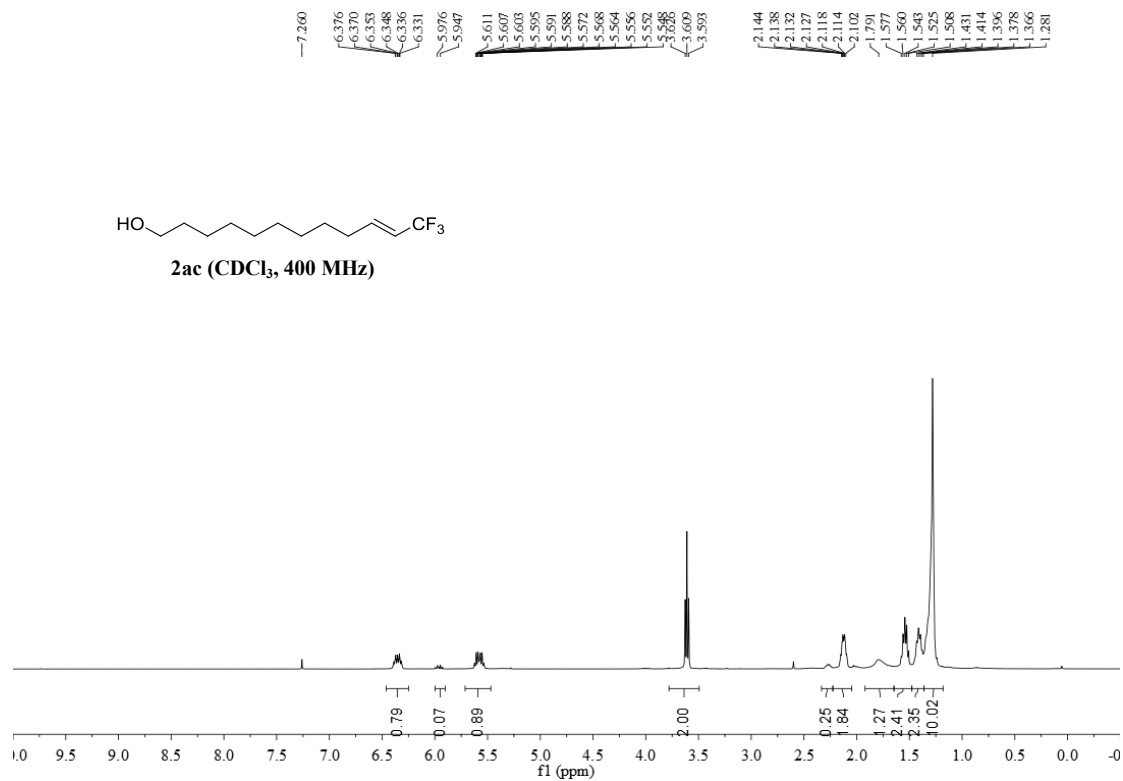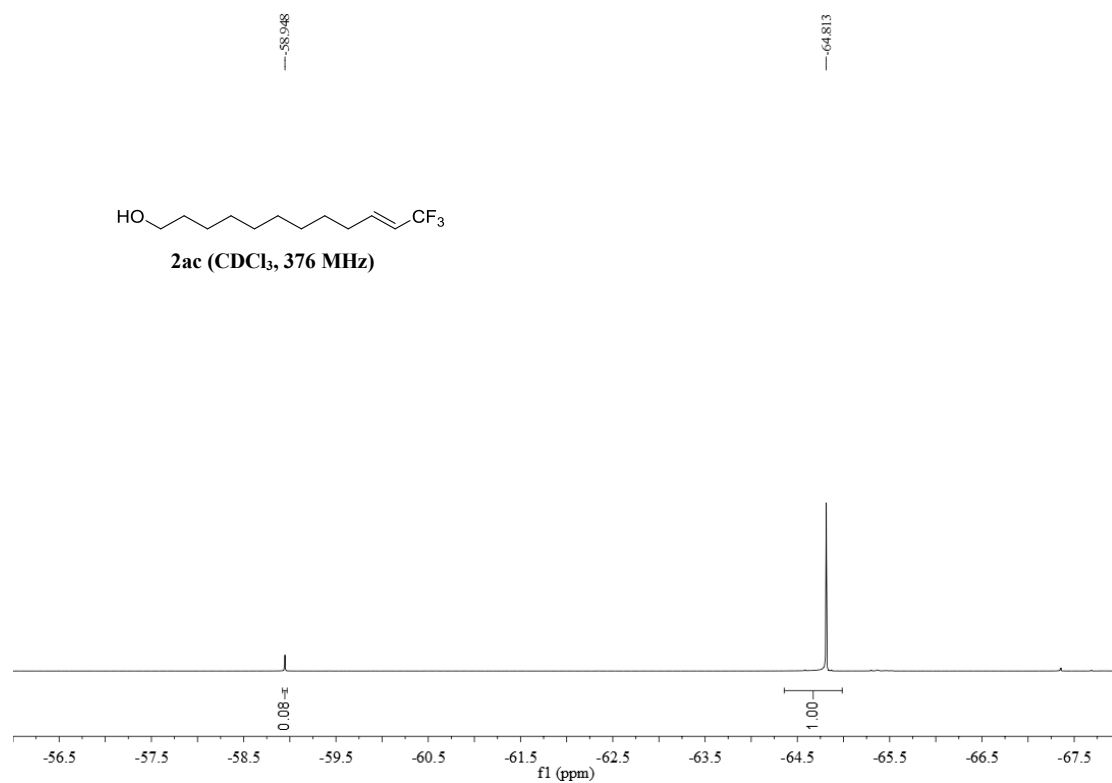



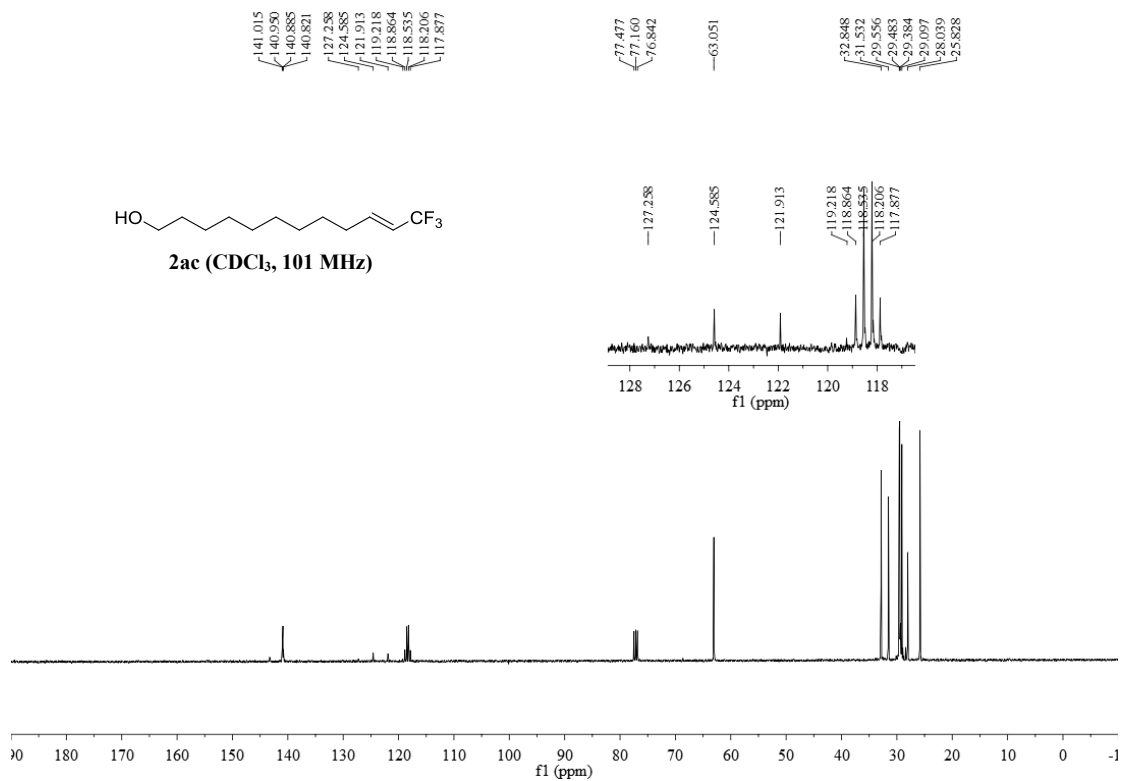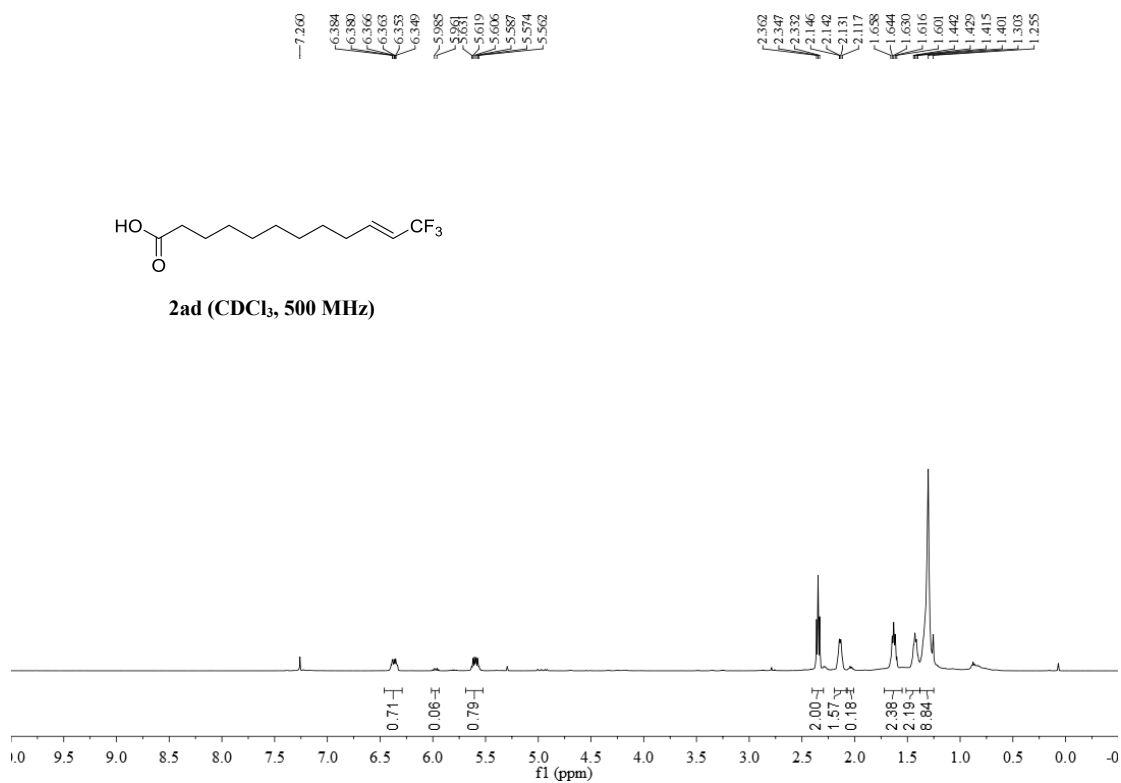

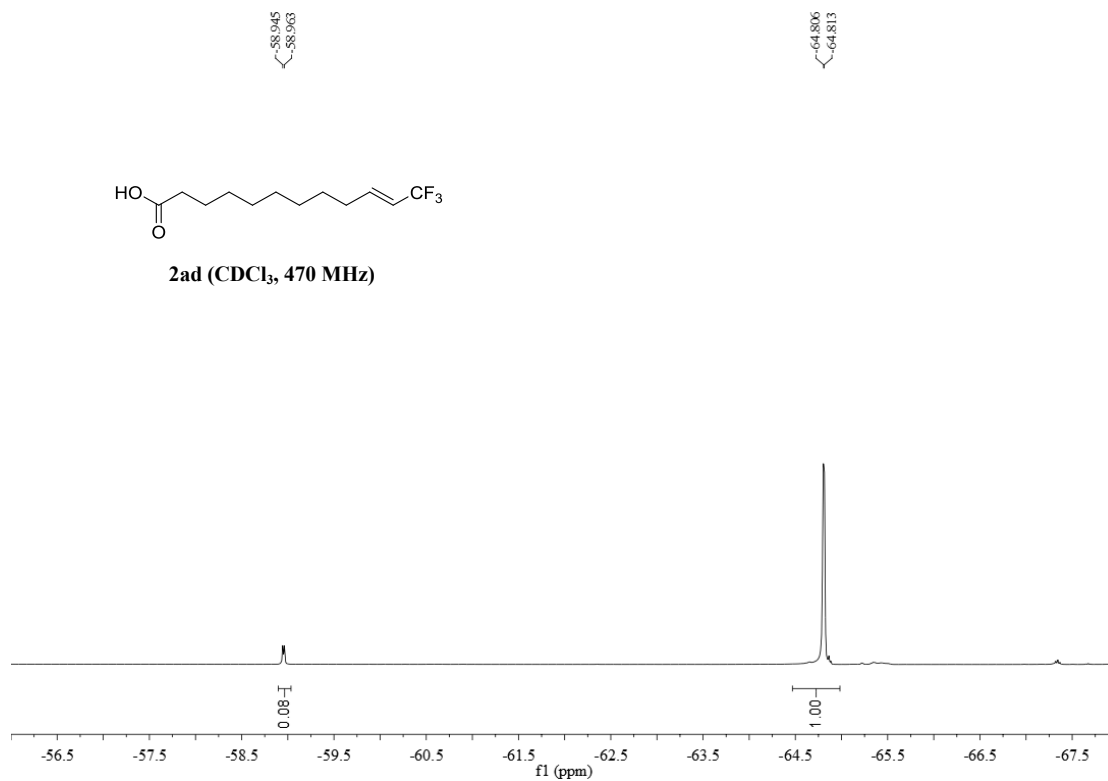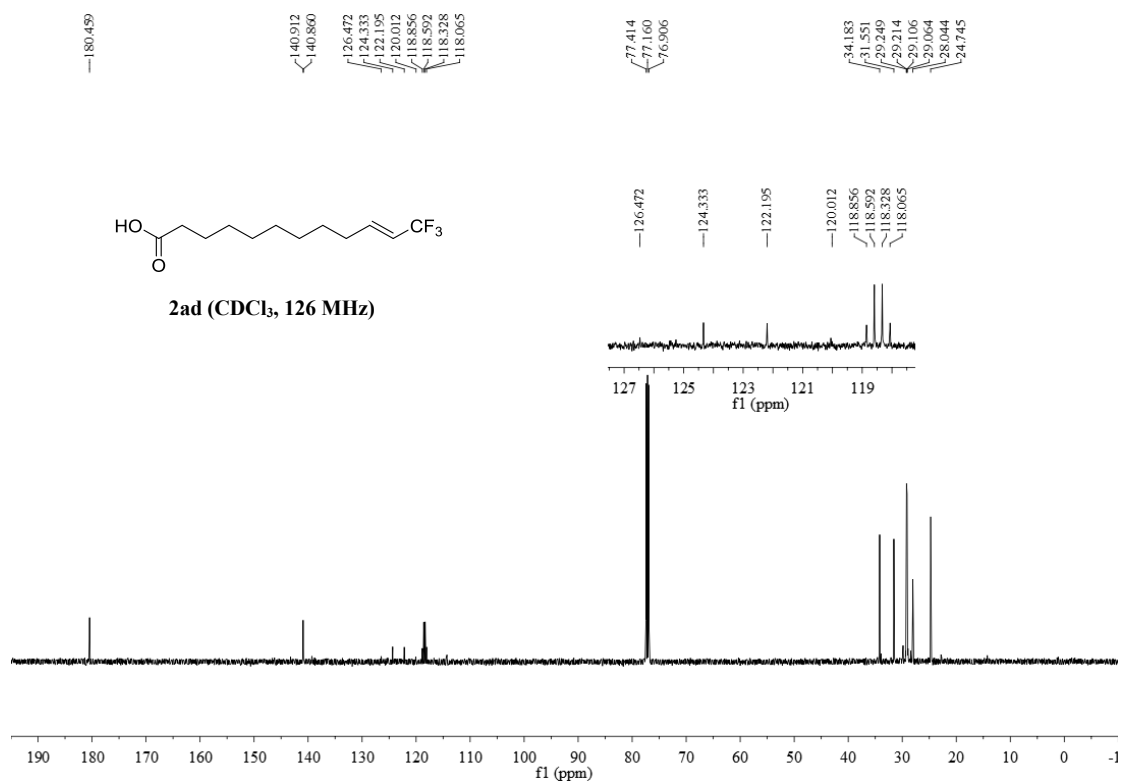

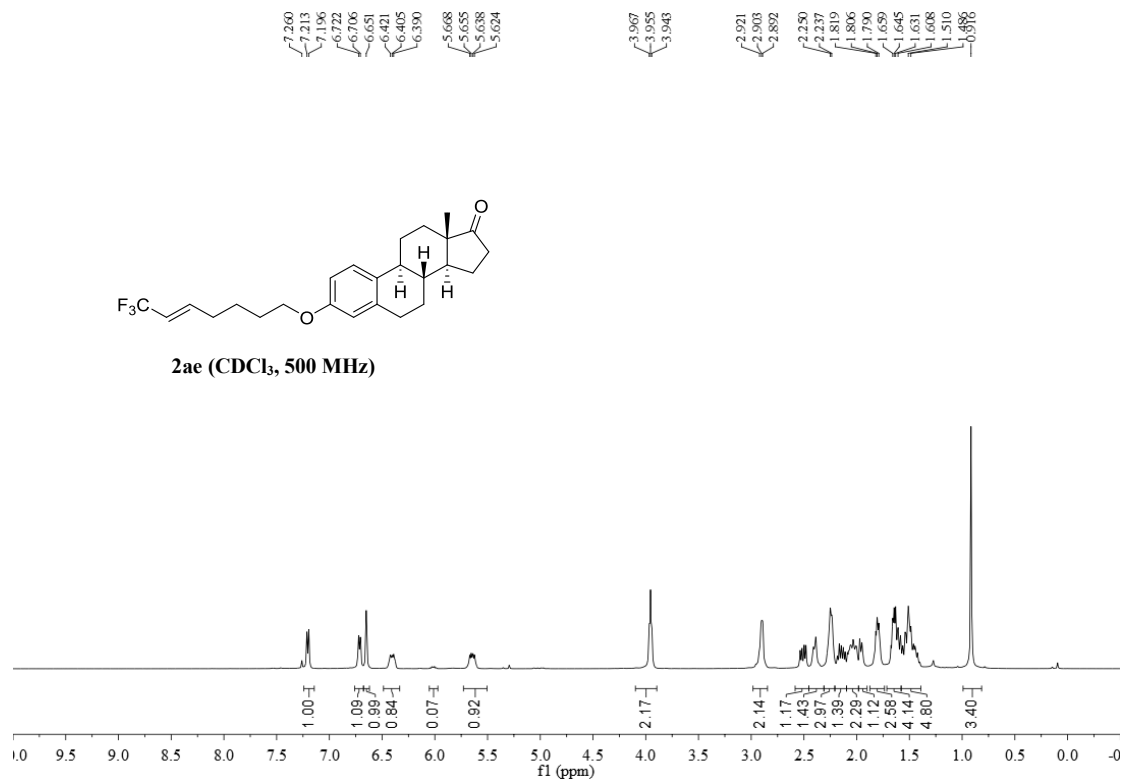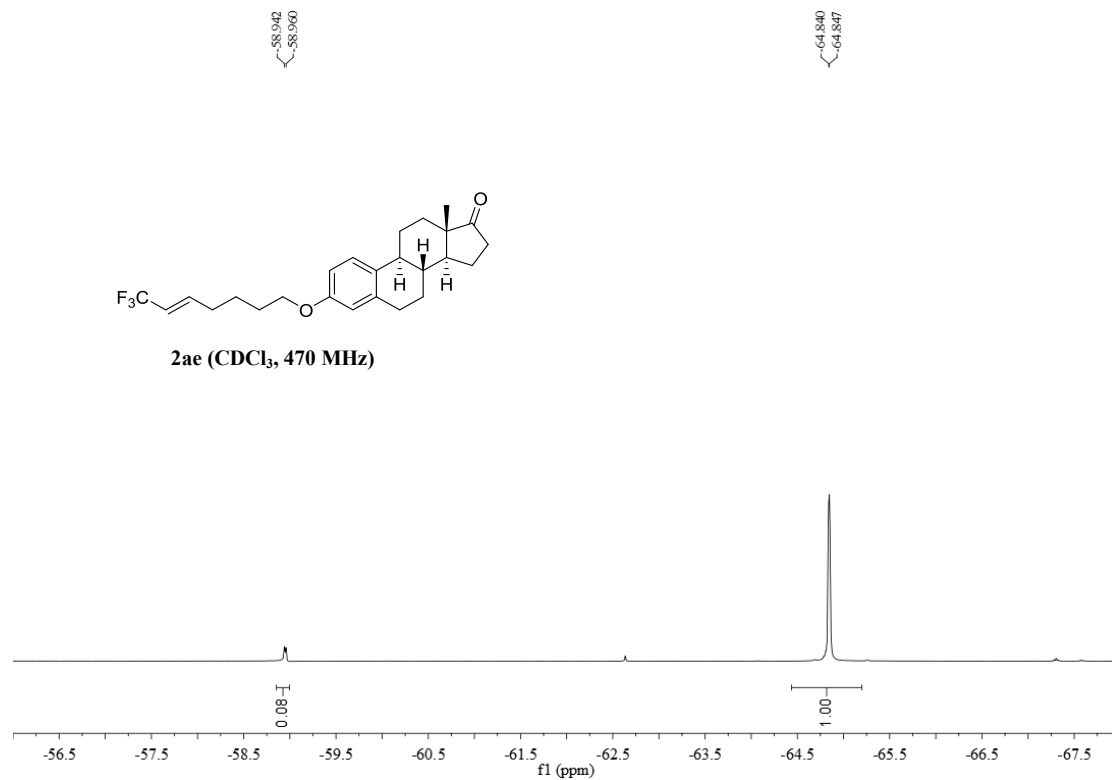

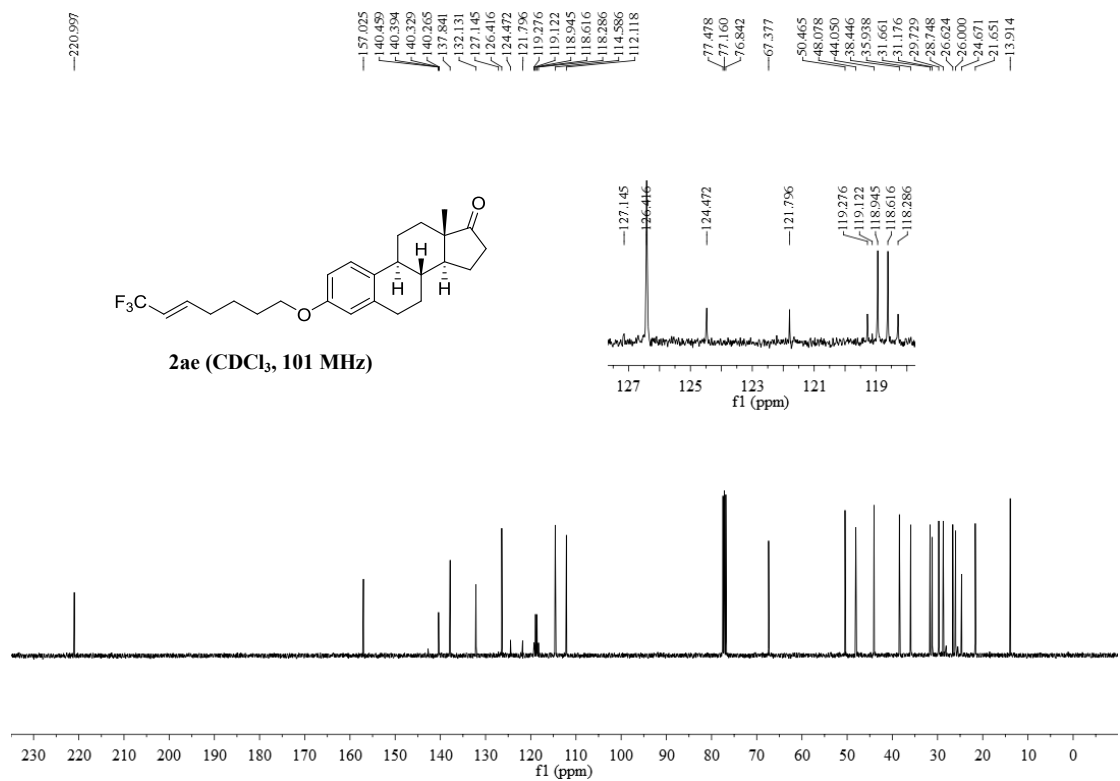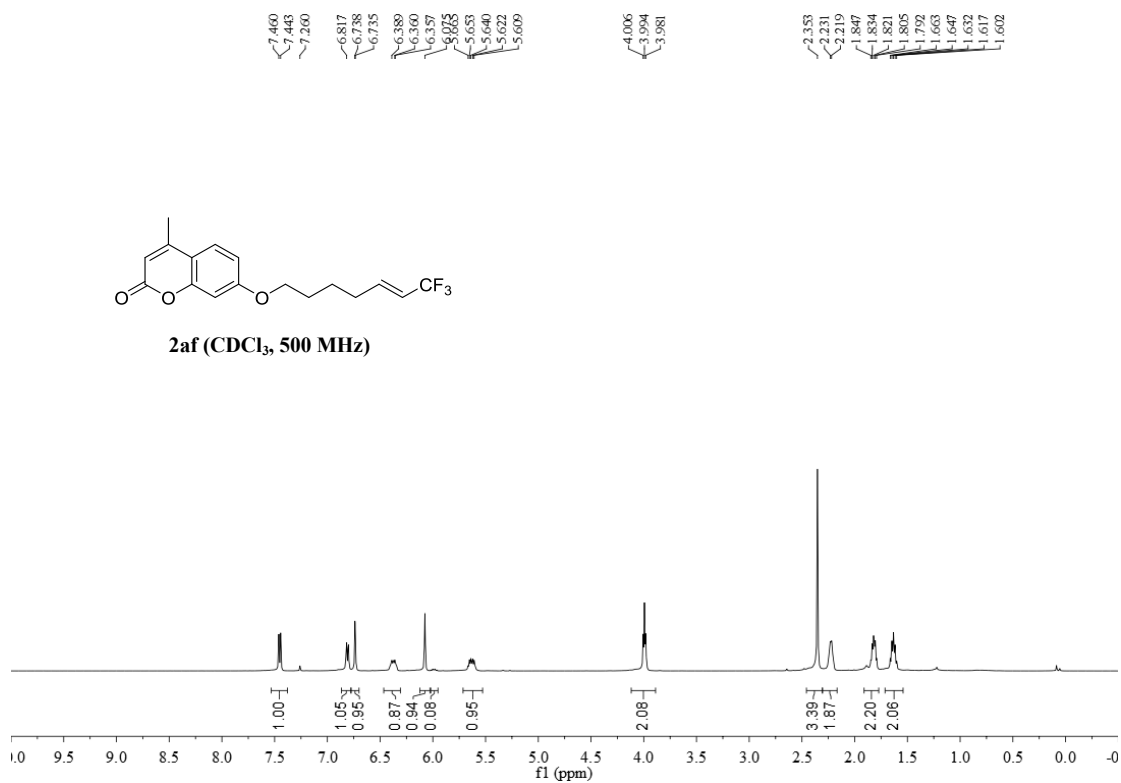

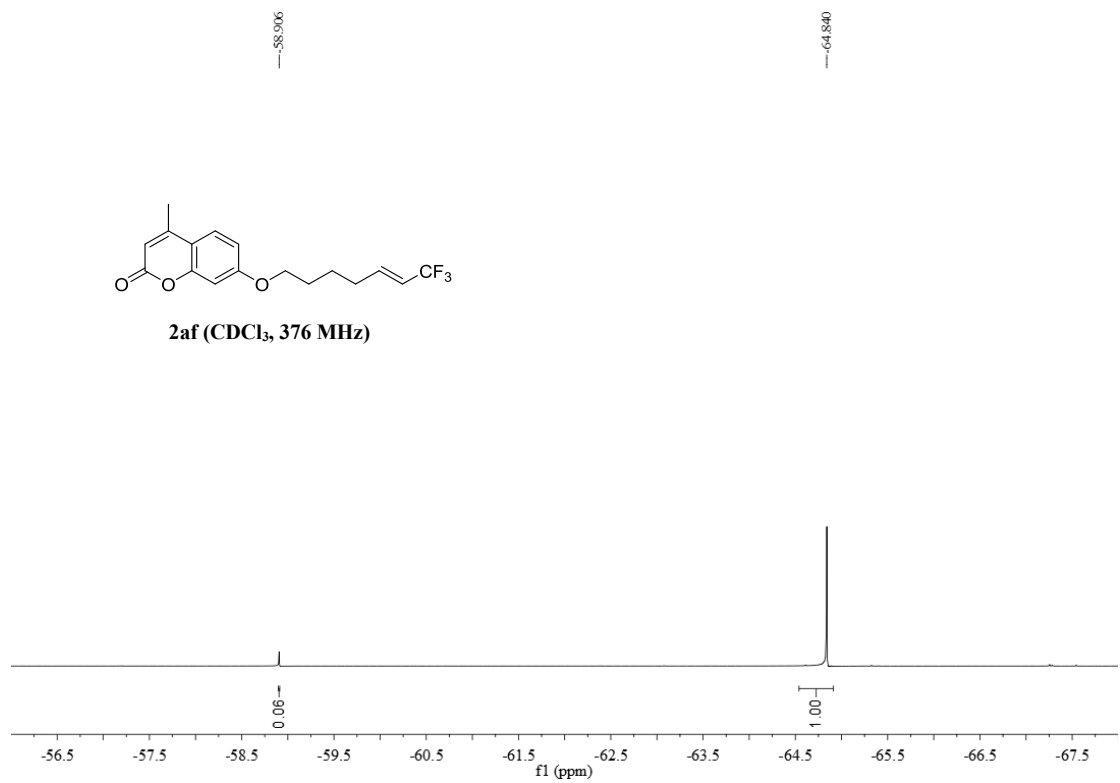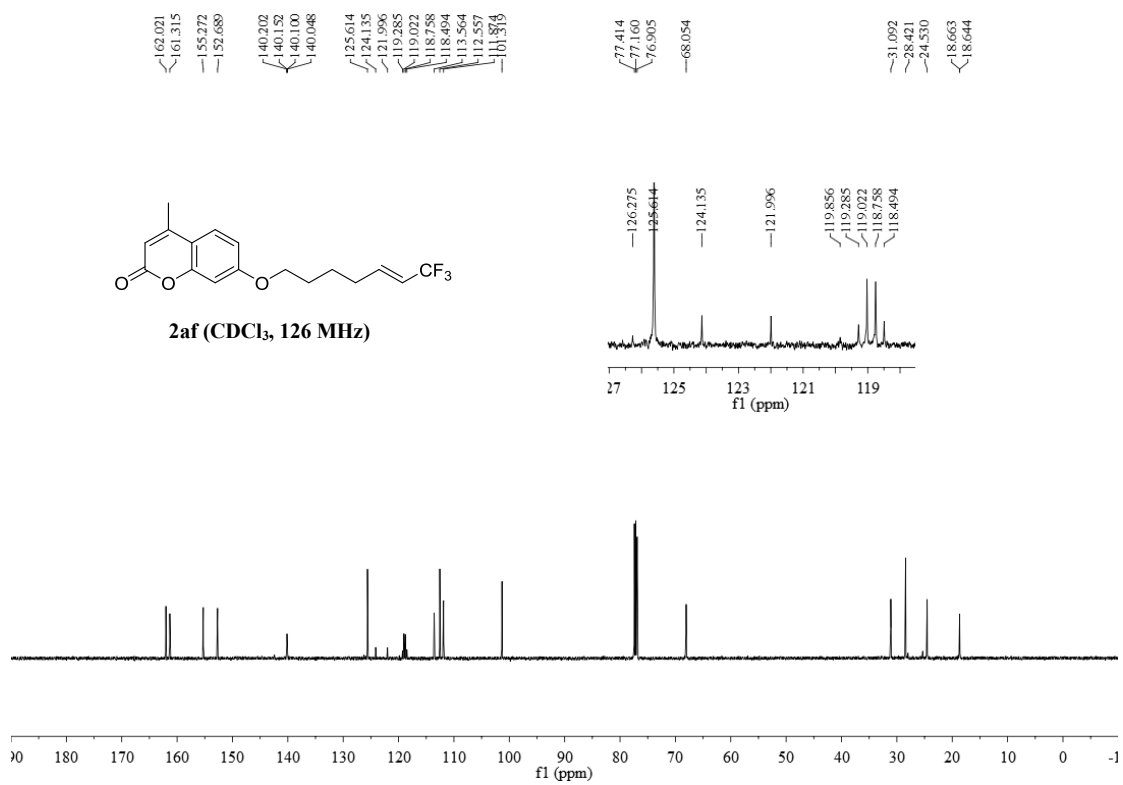

8.237  
8.234  
8.217  
8.214  
8.062  
8.051  
8.048  
8.042  
8.038  
8.033  
8.029  
8.027  
7.649  
7.635  
7.631  
7.628  
7.614  
7.610  
7.501  
7.486  
7.477  
7.473  
7.470  
7.374  
7.372  
7.354  
7.337  
7.334  
7.260  
6.327  
6.322  
6.316  
6.310  
6.305  
6.300  
6.293  
6.288  
6.283  
6.277  
6.271  
6.266  
6.261  
6.254  
6.249  
5.561  
5.545  
5.541  
5.533  
5.525  
5.521  
5.505  
4.037  
4.022  
2.126  
2.108  
2.090  
2.072  
1.719  
1.703  
1.687  
1.666  
1.650  
1.542  
1.522  
1.504  
1.484  
1.466

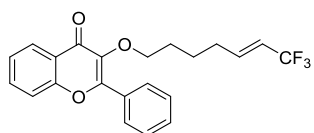

**2ag** (CDCl<sub>3</sub>, 400 MHz)

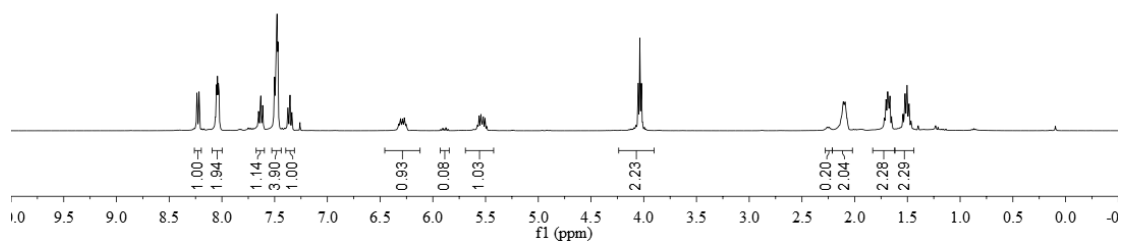

—58.944

—64.820

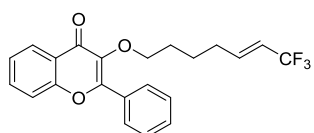

**2ag** (CDCl<sub>3</sub>, 376 MHz)

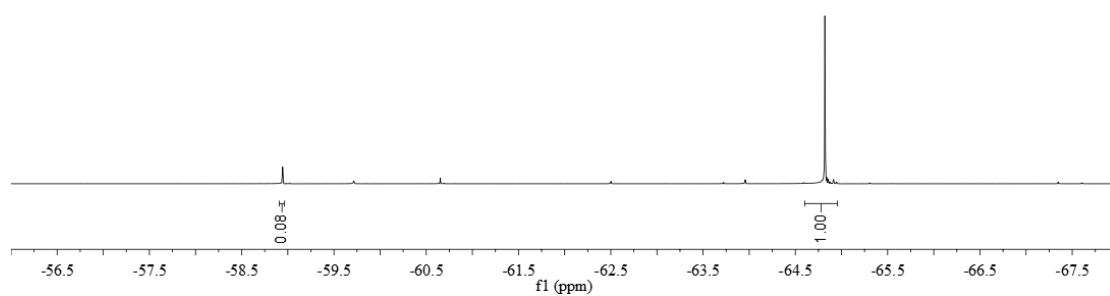

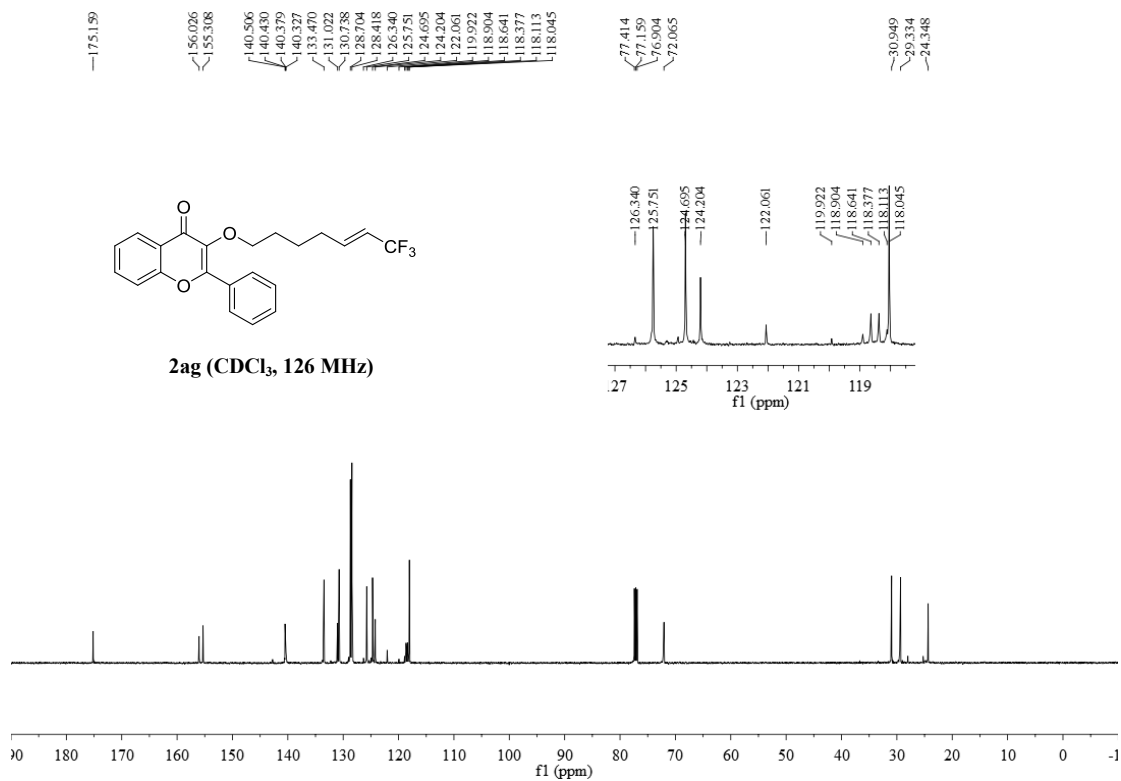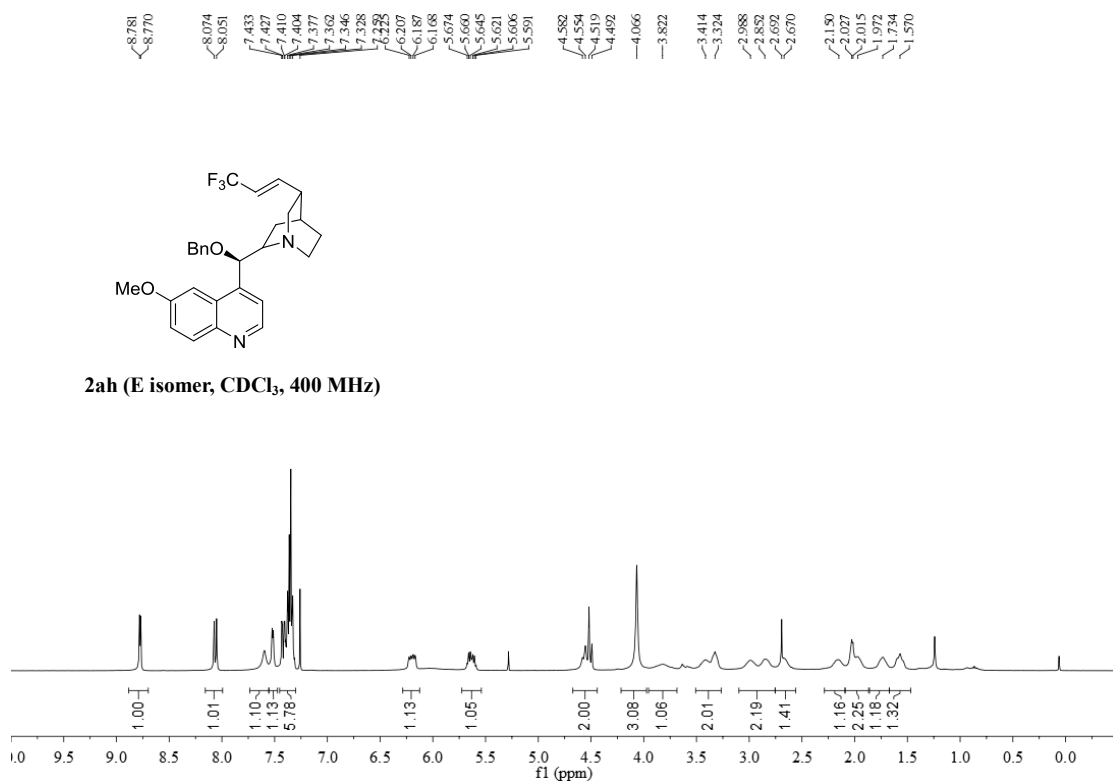

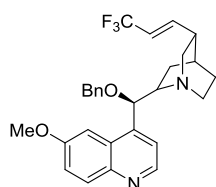

**2ah (E isomer, CDCl<sub>3</sub>, 376 MHz)**

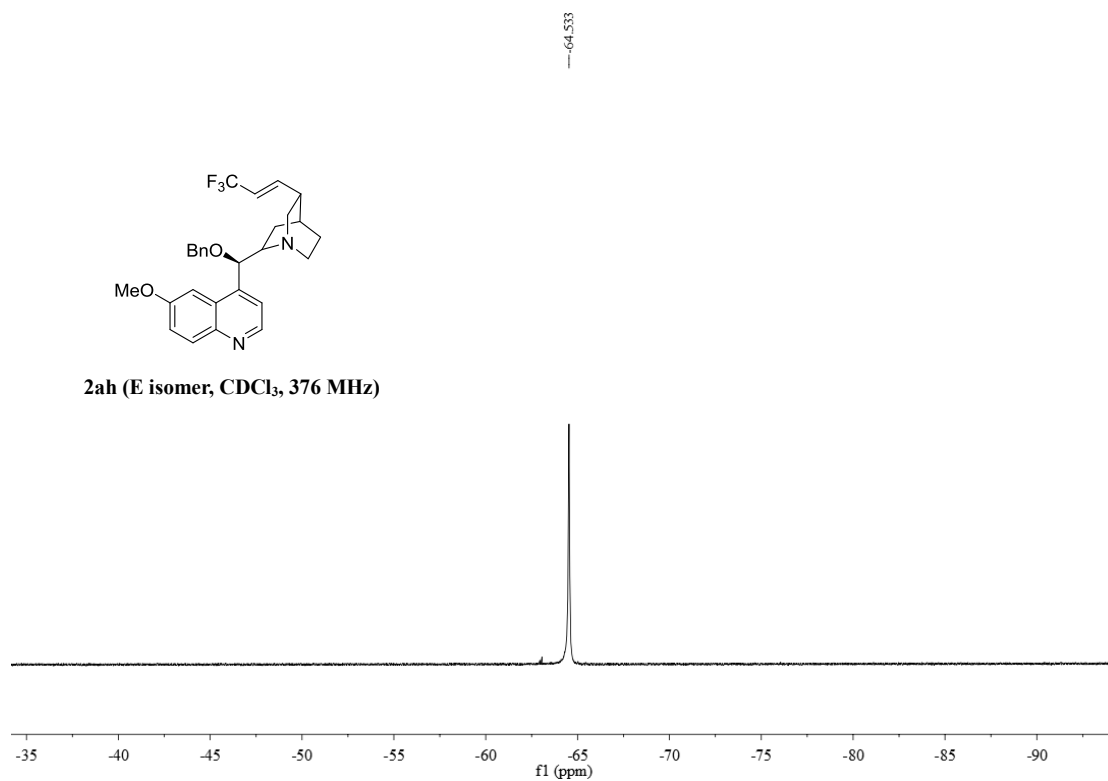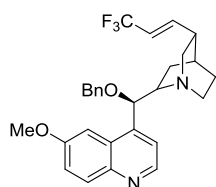

**2ah (E isomer, CDCl<sub>3</sub>, 101 MHz)**

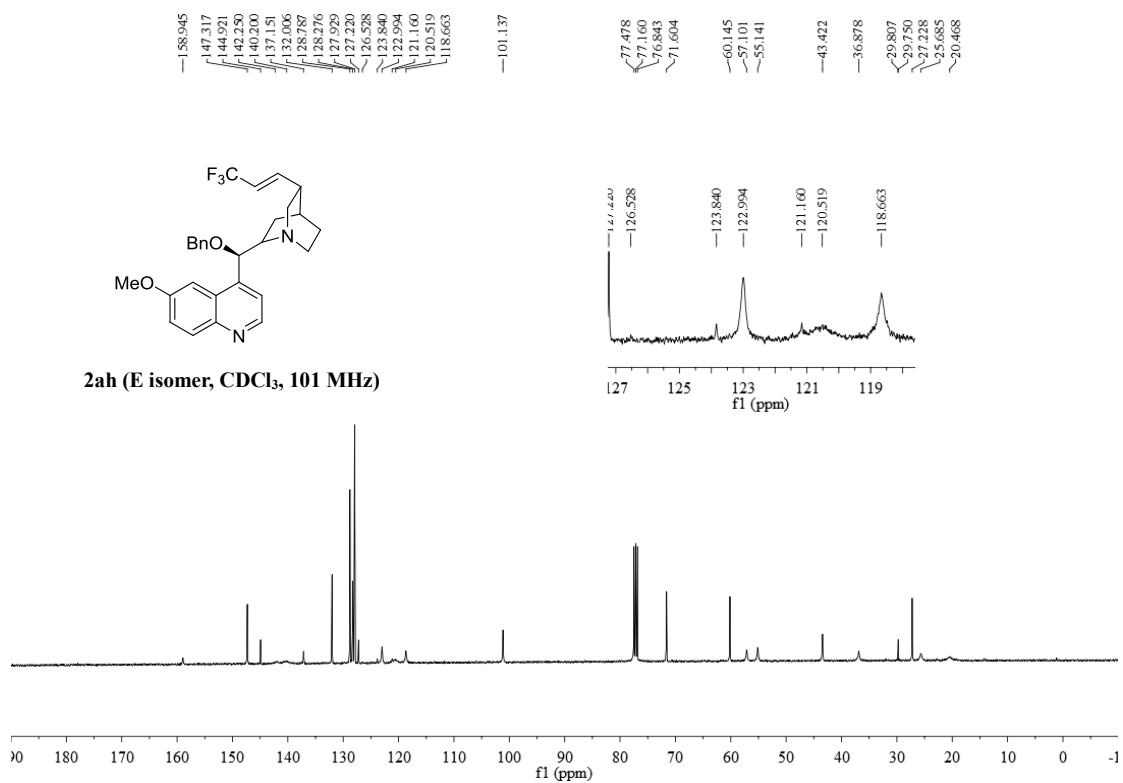



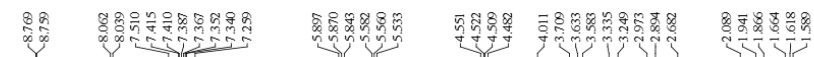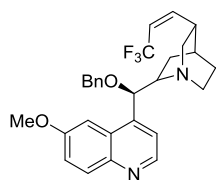

**2ah (Z isomer, CDCl<sub>3</sub>, 400 MHz)**

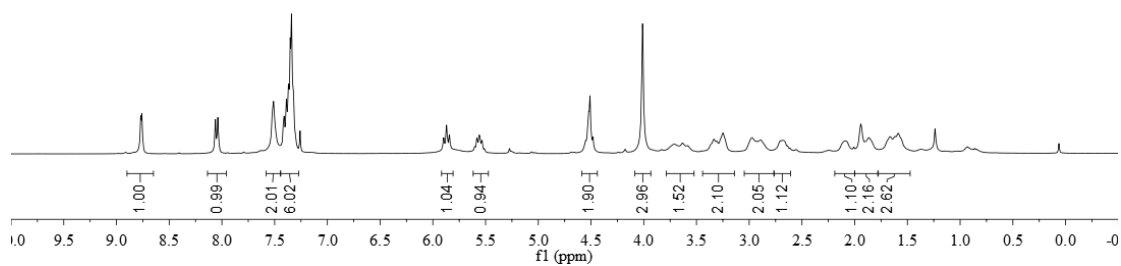

—58.729

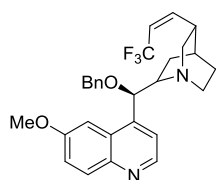

**2ah (Z isomer, CDCl<sub>3</sub>, 376 MHz)**

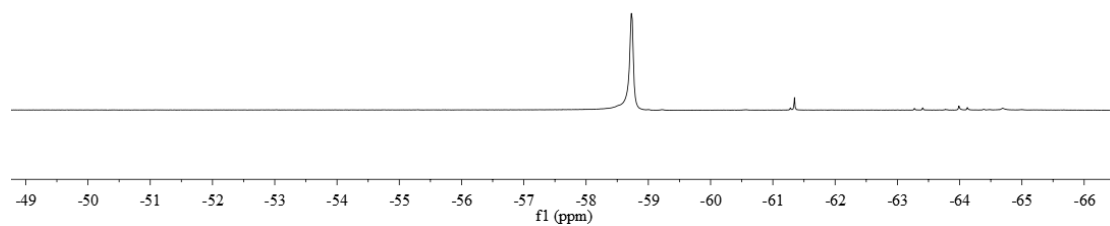

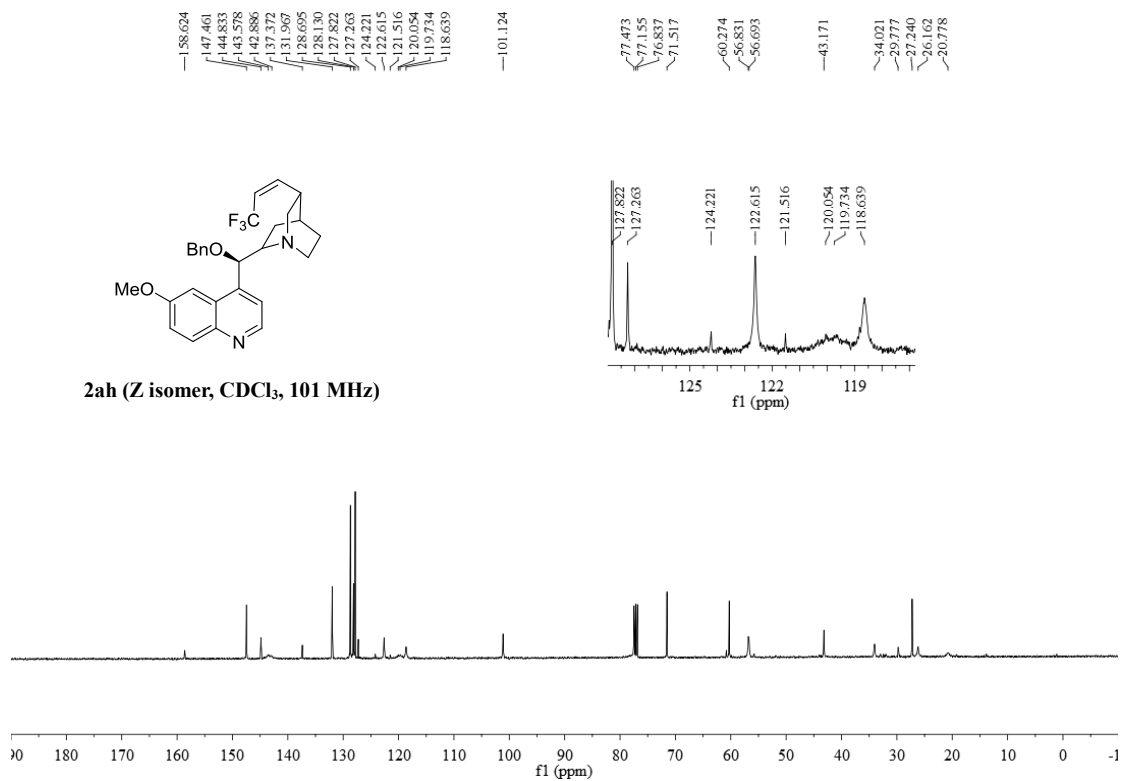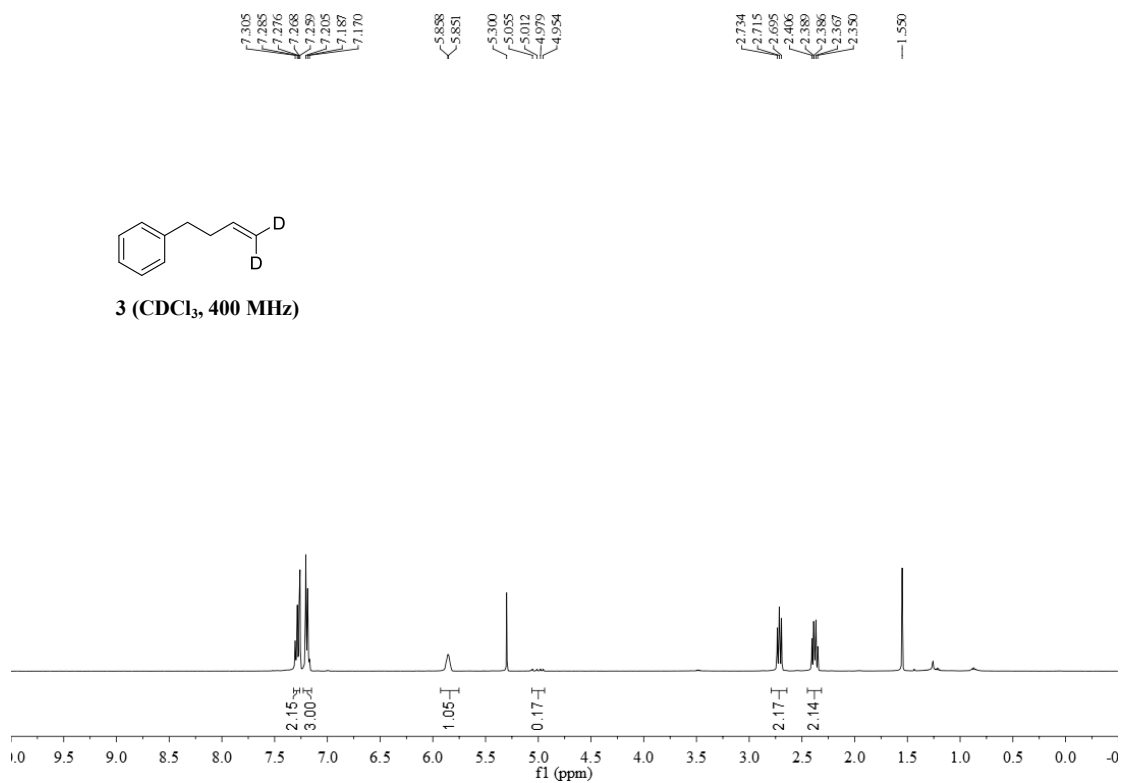

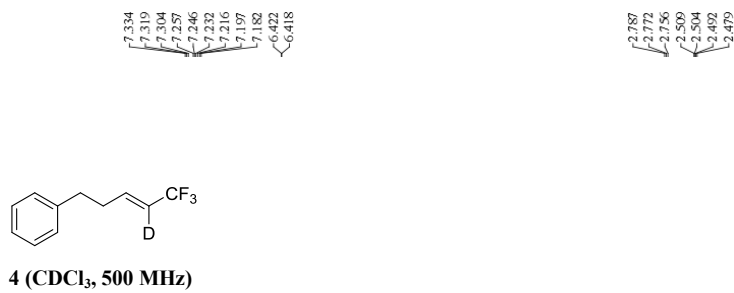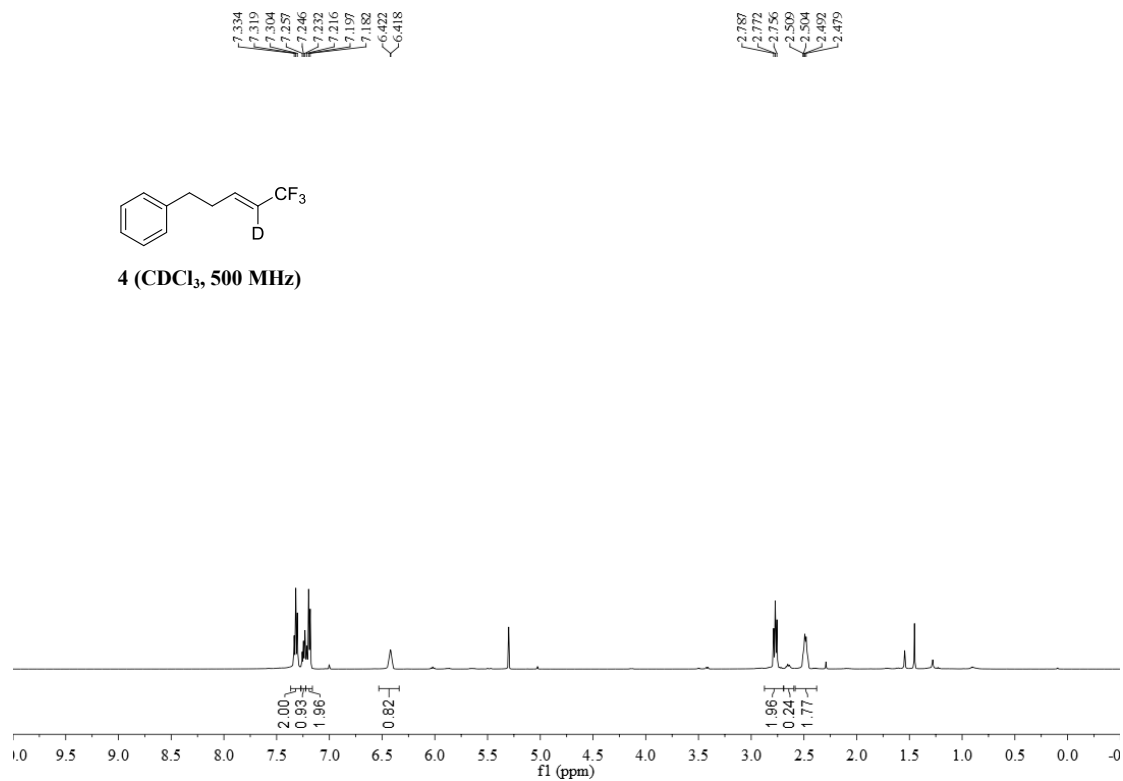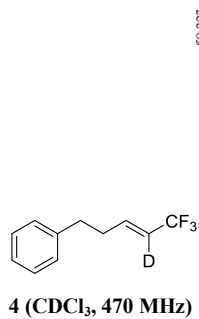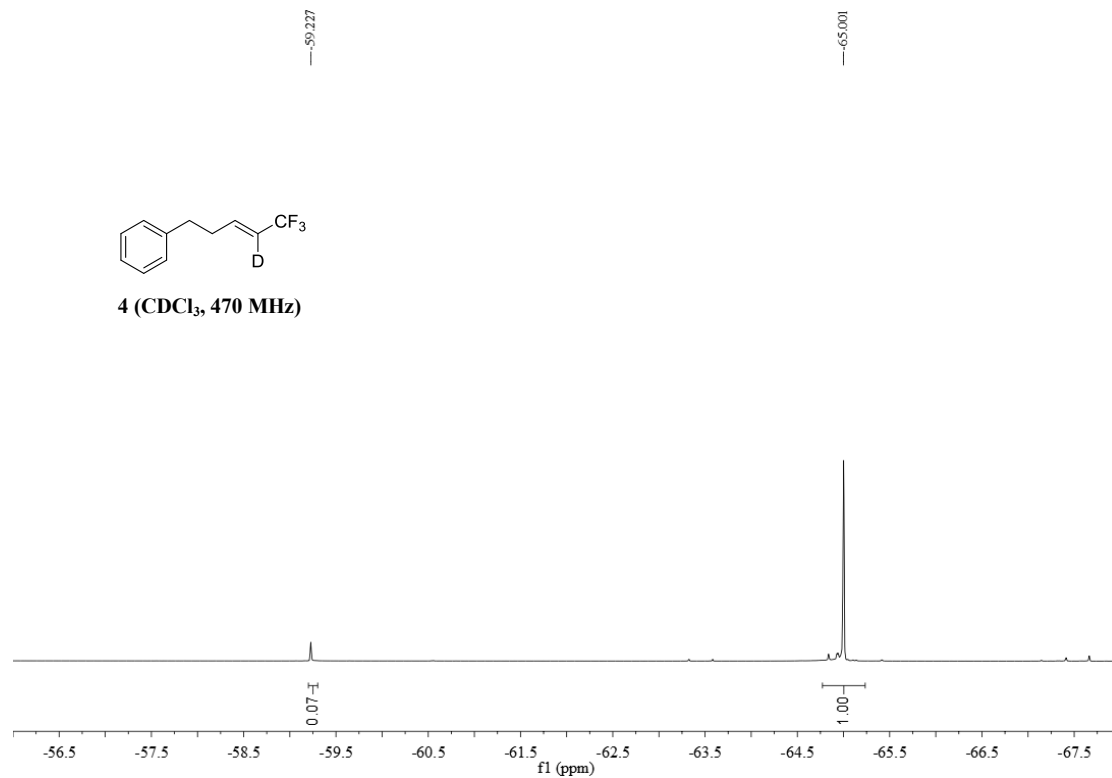

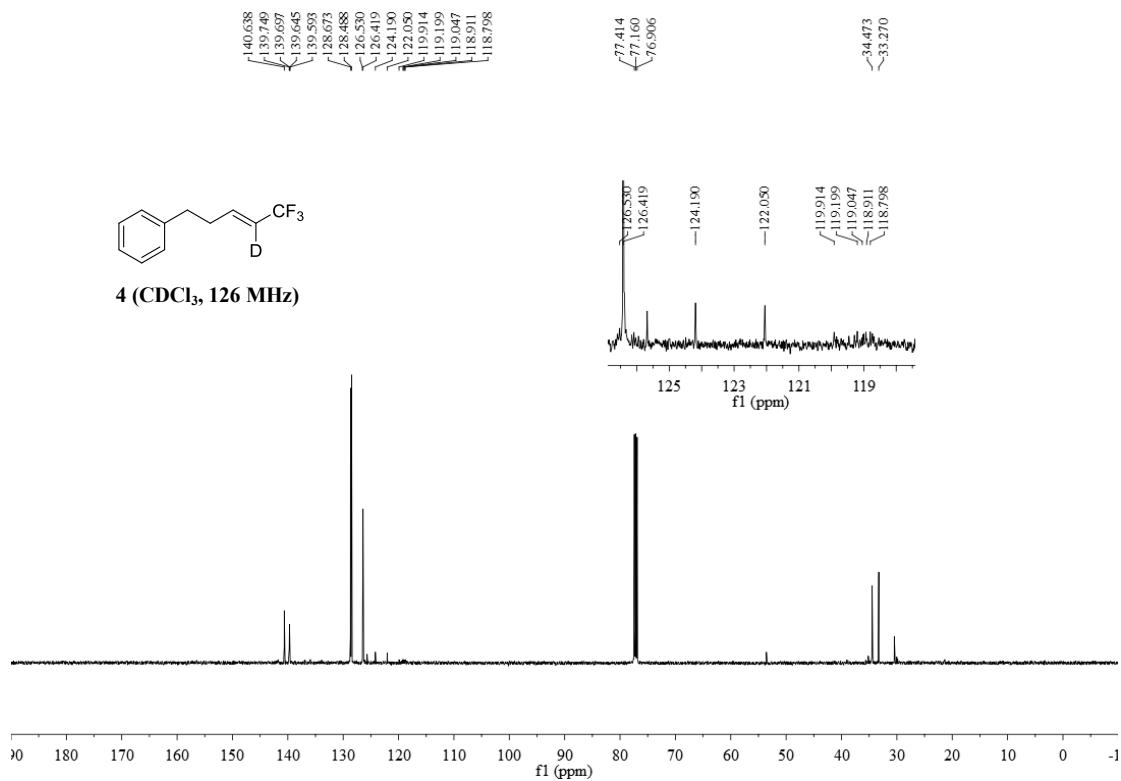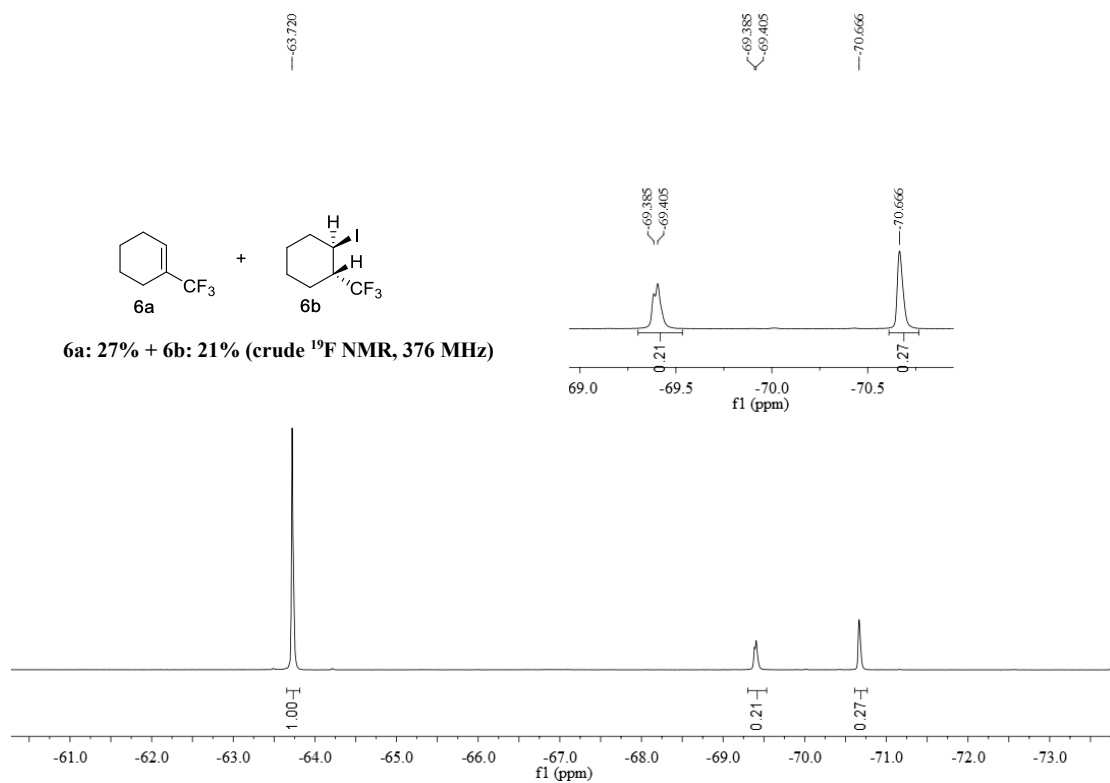

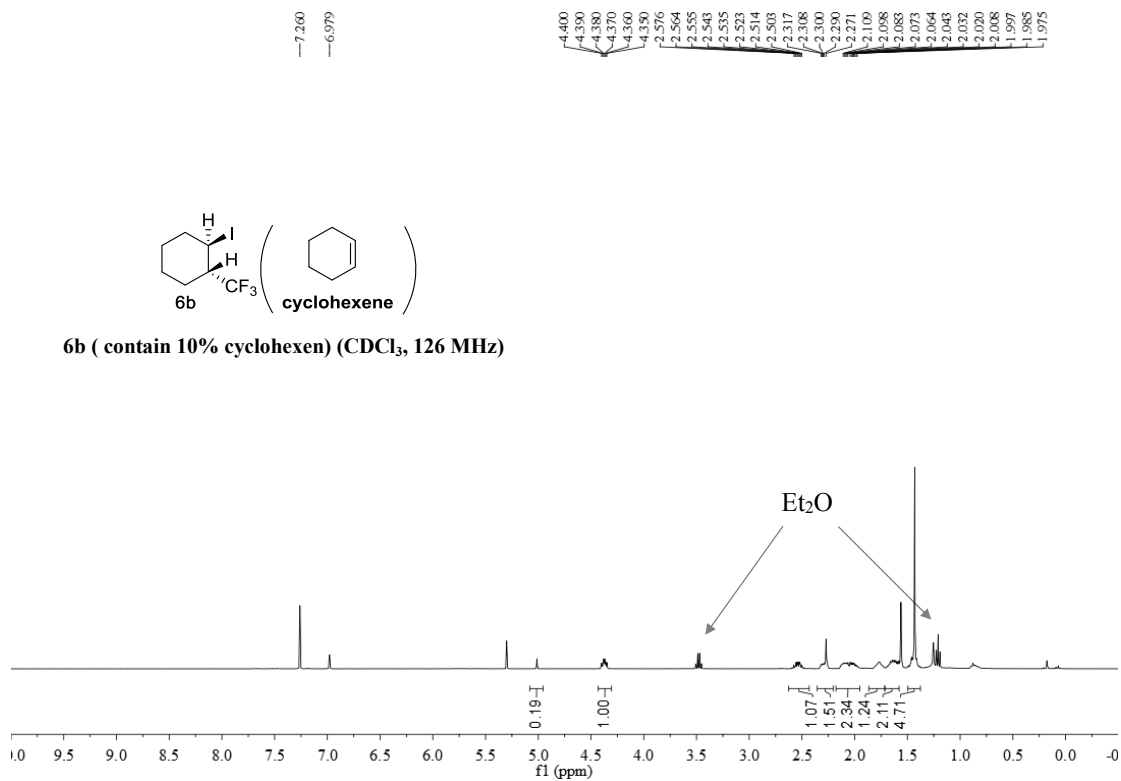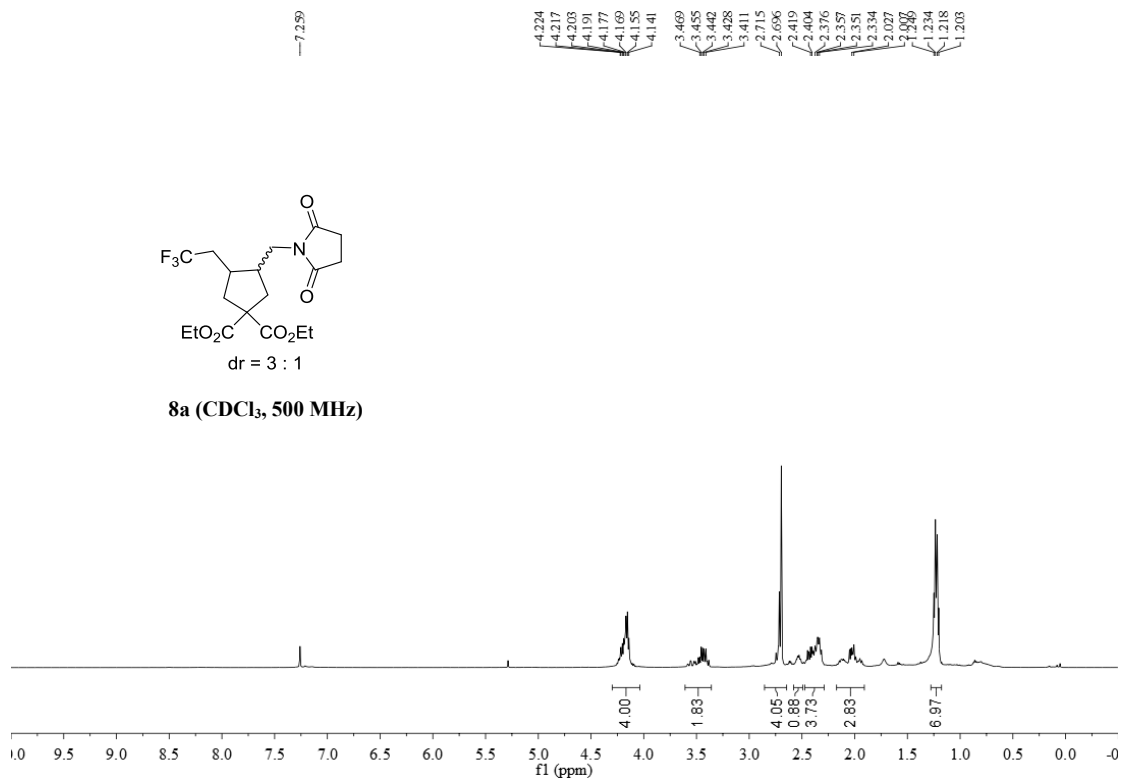

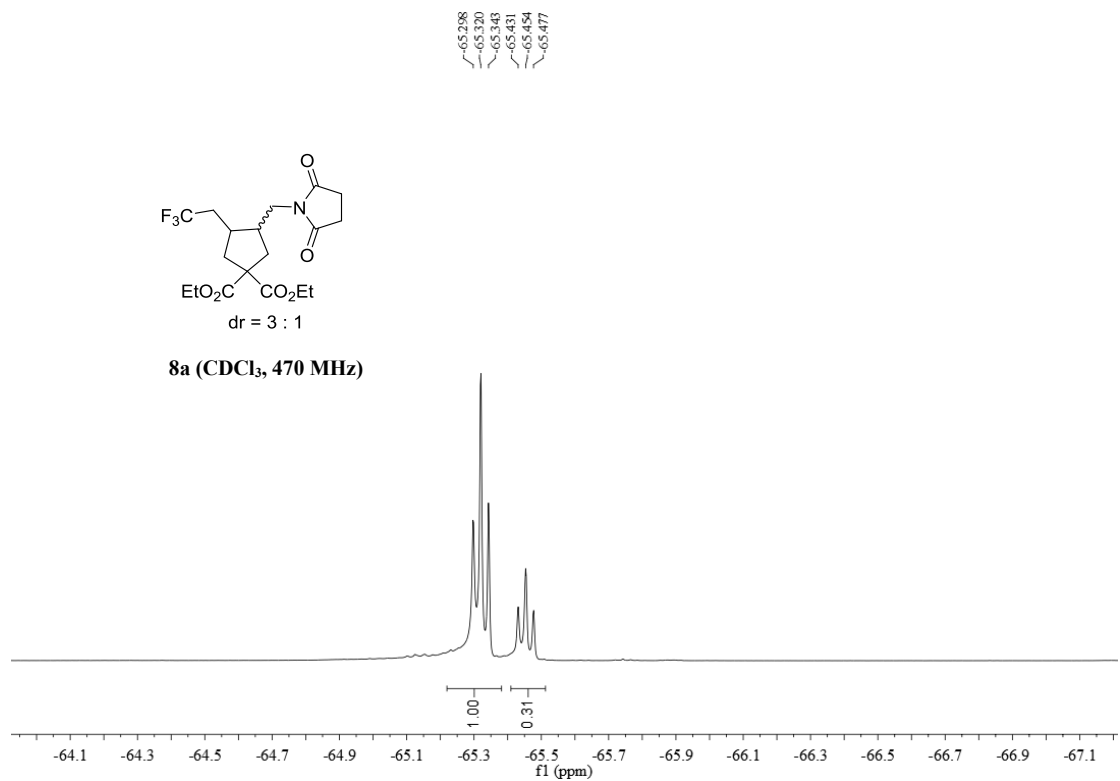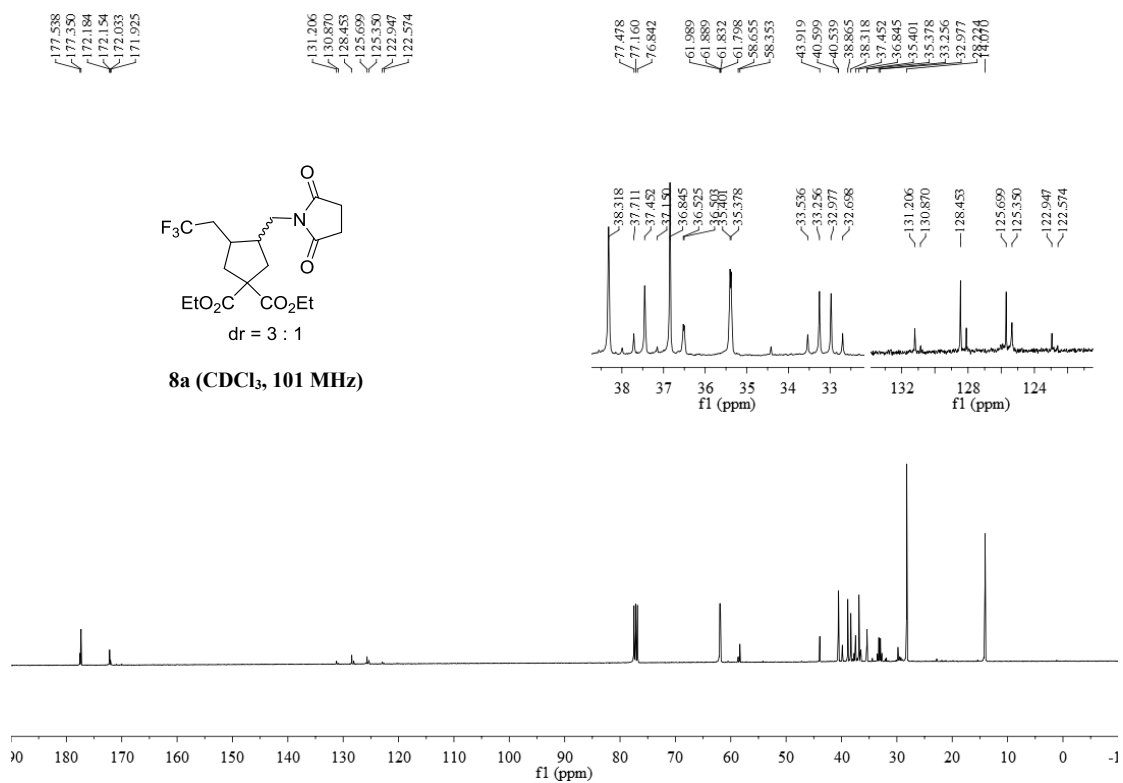

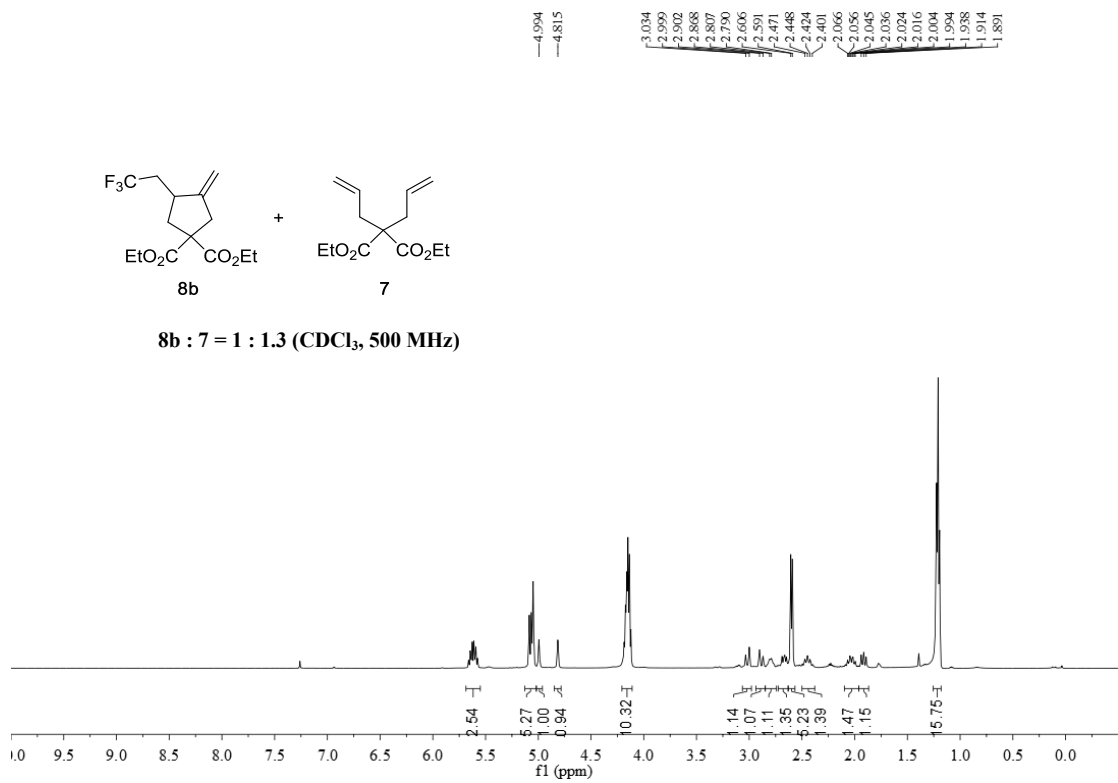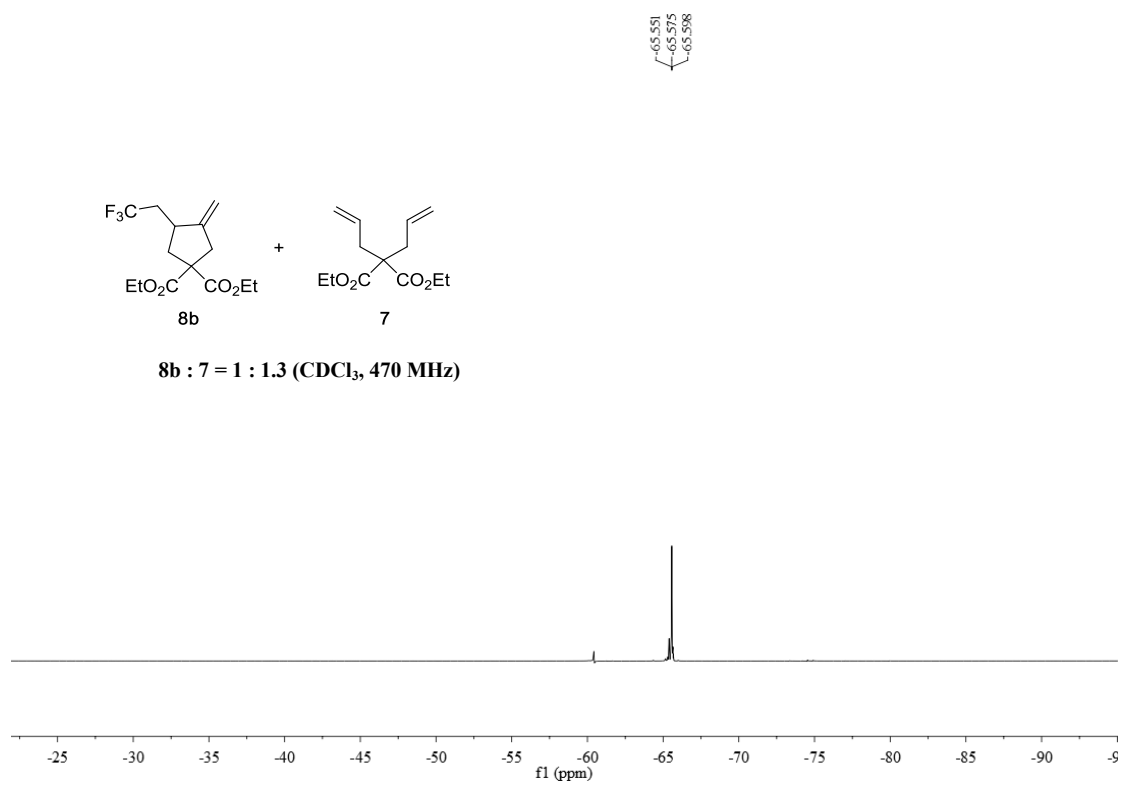

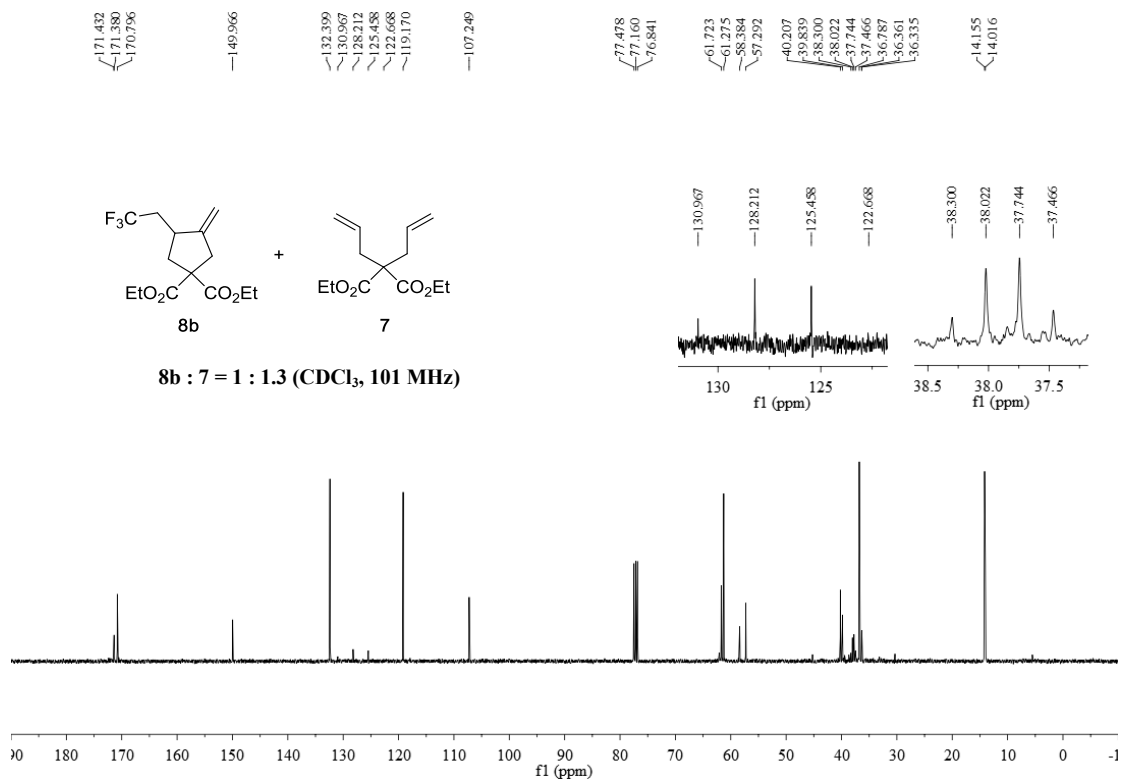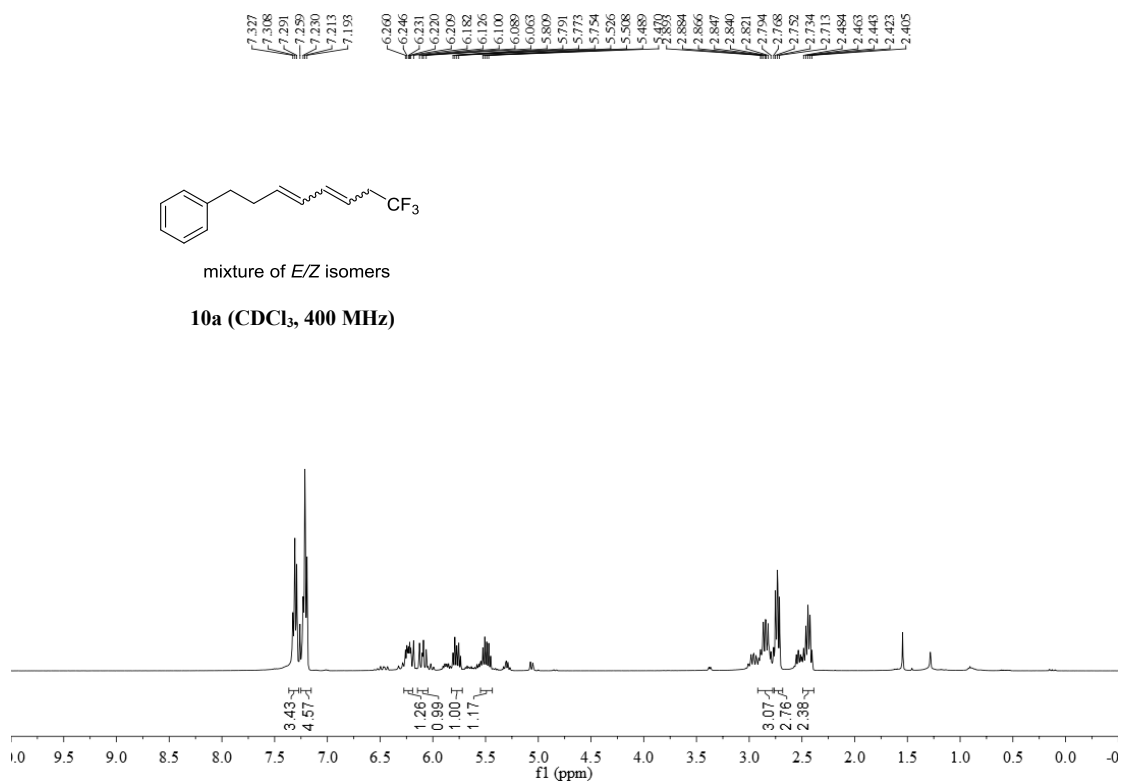



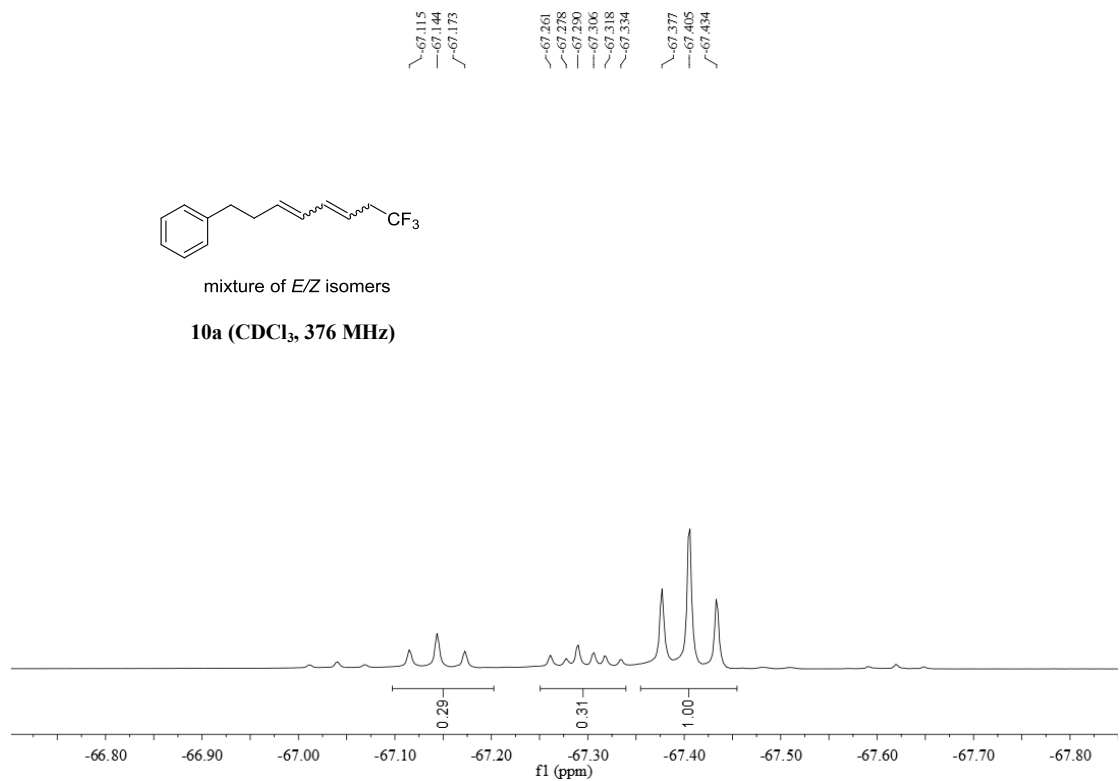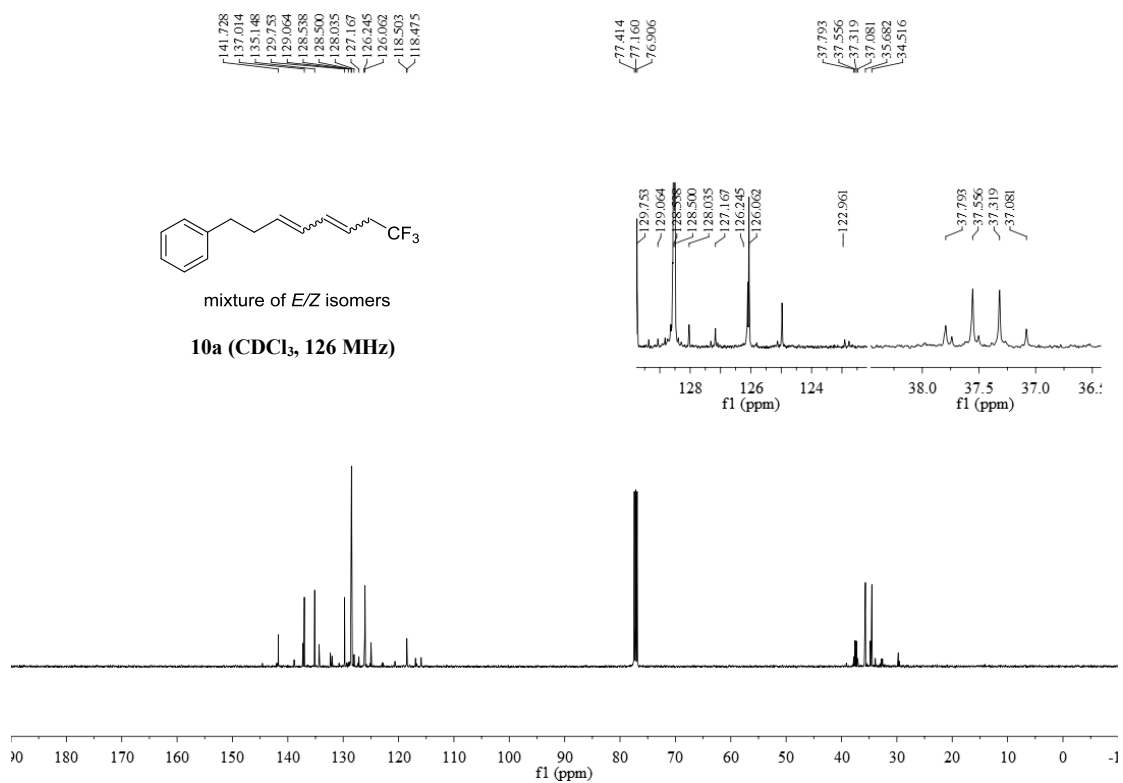

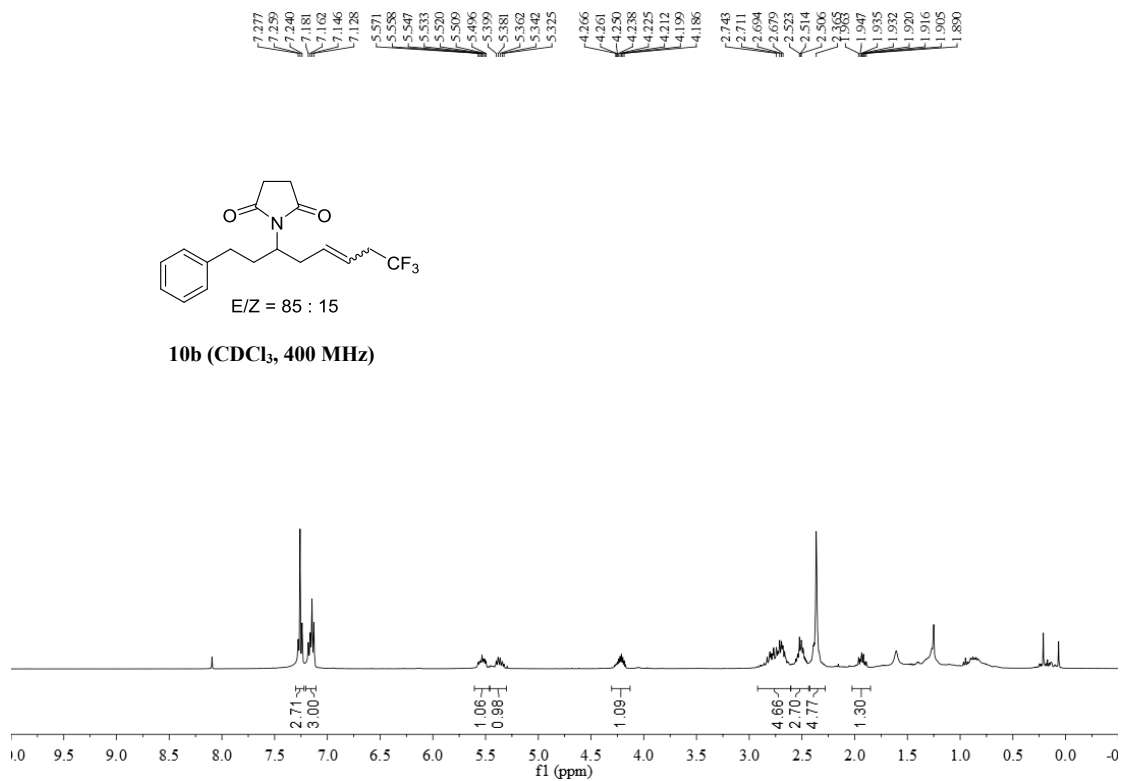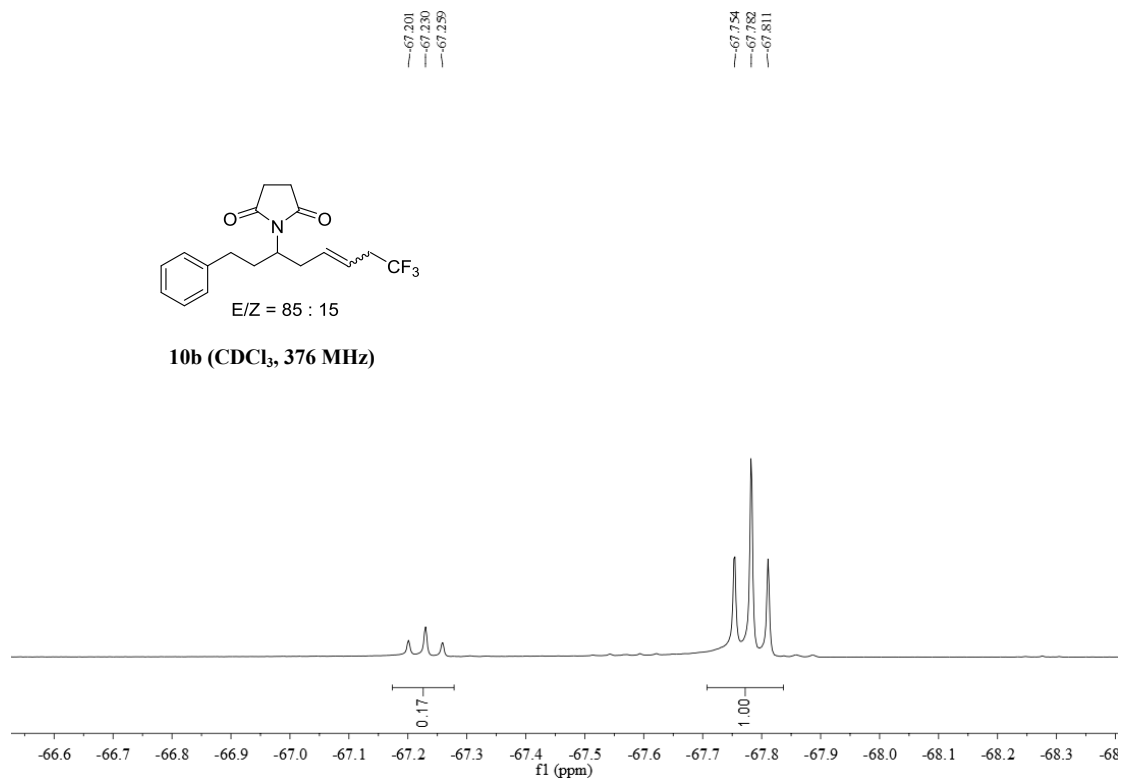

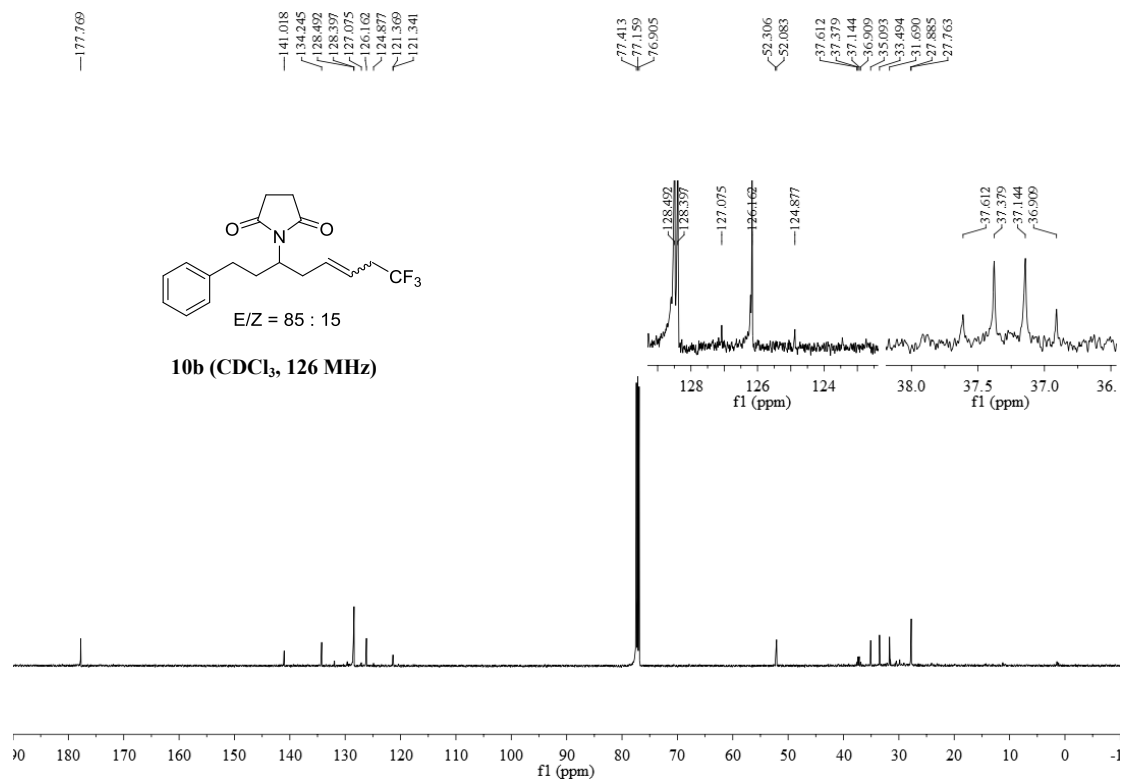

Supplement: Supplementary file 1 [file 14400632]
